# Supplementary material for: Novel SNP markers for flowering and seed quality traits in faba bean (Vicia faba L.): characterization and GWAS of a diversity panel
Source: Front Plant Sci. 2024 Mar 6;15:1348014. doi: 10.3389/fpls.2024.1348014 (PMC10950902; doi:10.3389/fpls.2024.1348014)
Supplement: Supplementary file 1 [file DataSheet_1.xlsx]

## Sheet: IDs and passport data
ID	Accession name	Advancement type	Country of origin	Origin (Breeder, genebank, or reseller)	Additional info
1	II-11-143	Uncertain	Hungary	NGPS Gene bank	https://npgsweb.ars-grin.gov/gringlobal/accessionDetail.aspx?id=1325707
2	Burstinskie 56	Advanced/improved cultivar	Sovjet Union	IPK Gatersleben	https://gbis.ipk-gatersleben.de/gbis2i/faces/pages/detail.jsf?akzessionId=233751
3	cercvi	Traditional cultivar/landrace	Georgia	IPK Gatersleben	https://gbis.ipk-gatersleben.de/gbis2i/faces/pages/detail.jsf?akzessionId=85318
4	Felix	Variety	Holland	IPK Gatersleben	https://gbis.ipk-gatersleben.de/gbis2i/faces/pages/detail.jsf?akzessionId=32756
5	FAB499	Breeding/research material	Morocco	IPK Gatersleben	https://gbis.ipk-gatersleben.de/gbis2i/faces/pages/detail.jsf?akzessionId=59804
6	WKT 06	Cultivated material	Turkey	NGPS Gene bank	https://npgsweb.ars-grin.gov/gringlobal/accessionDetail.aspx?id=1462864
7	8257	Wild material	Kyrgyzstan	NGPS Gene bank	https://npgsweb.ars-grin.gov/gringlobal/accessionDetail.aspx?id=1472694
8	Talia	Vegetable variety	United Kingdom	Novisem	https://www.novisem.nl/all-products/?lang=en
9	FAB 6779	Traditional cultivar/landrace	Peru	IPK Gatersleben	https://gbis.ipk-gatersleben.de/gbis2i/faces/pages/detail.jsf?akzessionId=224942
10	FAB 5138	Breeding/research material	Germany	IPK Gatersleben	https://gbis.ipk-gatersleben.de/gbis2i/faces/pages/detail.jsf?akzessionId=237230
11	PI 343831	Uncertain	Afganistan	NGPS Gene bank	https://npgsweb.ars-grin.gov/gringlobal/AccessionObservation.aspx?id=1256576
12	Puka Pinta	Cultivated material	Peru	NGPS Gene bank	https://npgsweb.ars-grin.gov/gringlobal/accessionDetail.aspx?id=1405529
13	FAB 6164	Traditional cultivar/landrace	Romania	IPK Gatersleben	https://gbis.ipk-gatersleben.de/gbis2i/faces/pages/detail.jsf?akzessionId=242487
14	Express	Variety	United Kingdom	Runåbergs Fröer	https://www.runabergsfroer.se/
15	Mallory	Variety	United Kingdom	NPZ	https://www.npz.de/en/varieties/field-beans/
16	ATC 63770	Cultivated material	China	NGPS Gene bank	https://npgsweb.ars-grin.gov/gringlobal/accessionDetail.aspx?id=1789166
17	Extra precoce	Vegetable variety	Italy	NGPS Gene bank	https://npgsweb.ars-grin.gov/gringlobal/AccessionObservation.aspx?id=1550052
18	Ausra	Advanced/improved cultivar	Lithuania	IPK Gatersleben	https://gbis.ipk-gatersleben.de/gbis2i/faces/pages/detail.jsf?akzessionId=32610
19	Divine	Variety	France	Agri Obtentions	http://www.agriobtentions.com/pulses/field-bean.html
20	Aurora	Variety	Sweden	Svalöf	https://www.nordgen.org/en/our-work/nordgen-plants/seed-and-potato-requests/
21	Green longpod	Advanced/improved cultivar	United Kingdom	IPK Gatersleben	https://gbis.ipk-gatersleben.de/gbis2i/faces/pages/detail.jsf?akzessionId=225306
22	Breustedts Sterntaler	Advanced/improved cultivar	Germany	IPK Gatersleben	https://gbis.ipk-gatersleben.de/gbis2i/faces/pages/detail.jsf?akzessionId=32752
23	FAB 5069 (DNE)	Breeding/research material	Germany	IPK Gatersleben	https://gbis.ipk-gatersleben.de/gbis2i/faces/pages/detail.jsf?akzessionId=251286
24	ATC 63781	Cultivated material	China	NGPS Gene bank	https://npgsweb.ars-grin.gov/gringlobal/accessionDetail.aspx?id=1789177
25	PI 223304	Cultivated material	Afganistan	NGPS Gene bank	https://npgsweb.ars-grin.gov/gringlobal/accessionDetail.aspx?id=1180263
26	Sv 0420	Breeding/research material	Sweden	IPK Gatersleben	https://gbis.ipk-gatersleben.de/gbis2i/faces/pages/detail.jsf?akzessionId=32729
27	Sving	Variety	Sweden	Svalöf	https://www.nordgen.org/en/our-work/nordgen-plants/seed-and-potato-requests/
28	Uladovskie F.	Advanced/improved cultivar	Ukraine	IPK Gatersleben	https://gbis.ipk-gatersleben.de/gbis2i/faces/pages/detail.jsf?akzessionId=32629
29	Latvija	Advanced/improved cultivar	Latvia	IPK Gatersleben	https://gbis.ipk-gatersleben.de/gbis2i/faces/pages/detail.jsf?akzessionId=32727
30	870530-01	Cultivated material	Spain	NGPS Gene bank	https://npgsweb.ars-grin.gov/gringlobal/accessionDetail.aspx?id=1428672
31	Melodie	Variety	France	Agri Obtentions	http://www.agriobtentions.com/pulses/field-bean.html
32	FAB 6517	Traditional cultivar/landrace	Yugoslavia	IPK Gatersleben	https://gbis.ipk-gatersleben.de/gbis2i/faces/pages/detail.jsf?akzessionId=247892
33	Fanfare	Variety	Germany	NPZ	https://www.npz.de/en/varieties/field-beans/
34	FAB 455	Traditional cultivar/landrace	Bulgaria	IPK Gatersleben	https://gbis.ipk-gatersleben.de/gbis2i/faces/pages/detail.jsf?akzessionId=32872
35	Kornberger	Advanced/improved cultivar	Germany	IPK Gatersleben	https://gbis.ipk-gatersleben.de/gbis2i/faces/pages/detail.jsf?akzessionId=32659
36	Medium tick	Advanced/improved cultivar	United Kingdom	NGPS Gene bank	https://npgsweb.ars-grin.gov/gringlobal/AccessionObservation.aspx?id=1278686
37	Ghengis	Variety	Germany	NPZ	https://www.npz.de/en/varieties/field-beans/
38	Haba Comon	Traditional cultivar/landrace	Spain	IPK Gatersleben	https://gbis.ipk-gatersleben.de/gbis2i/faces/pages/detail.jsf?akzessionId=77556
39	Kontu	Variety	Finland	Boreal	https://boreal.fi/sv/sorter/bondbona/
40	Tesoro	Variety	Germany	NPZ	https://www.npz.de/en/varieties/field-beans/
41	M89-34	Cultivated material	Morocco	NGPS Gene bank	https://npgsweb.ars-grin.gov/gringlobal/AccessionObservation.aspx?id=1001496
42	Birgit	Variety	Germany	PH Petersen	https://www.phpetersen.com/en/products/legumes/field-bean/
43	ATC 63751	Cultivated material	China	NGPS Gene bank	https://npgsweb.ars-grin.gov/gringlobal/accessionDetail.aspx?id=1789150
44	Isabell	Variety	Germany	NordGen	https://www.nordgen.org/en/our-work/nordgen-plants/seed-and-potato-requests/
45	Krasnoiarskie m	Advanced/improved cultivar	Russia	IPK Gatersleben	https://gbis.ipk-gatersleben.de/gbis2i/faces/pages/detail.jsf?akzessionId=254177
46	Bakula	Cultivated material	Nepal	NGPS Gene bank	https://npgsweb.ars-grin.gov/gringlobal/accessionDetail.aspx?id=1472712
47	Super Aquadulce	Vegetable variety	Unknown	Runåbergs Fröer	https://www.runabergsfroer.se/
48	B18A	Uncertain	United States	NGPS Gene bank	https://npgsweb.ars-grin.gov/gringlobal/accessionDetail.aspx?id=1278685
49	FAB 6776	Traditional cultivar/landrace	Bolivia	IPK Gatersleben	https://gbis.ipk-gatersleben.de/gbis2i/faces/pages/detail.jsf?akzessionId=260745
50	Dwarf Ö53	Breeding/research material	Sweden	Svalöf	https://www.nordgen.org/en/our-work/nordgen-plants/seed-and-potato-requests/
51	Anuksen Kanta	Traditional cultivar/landrace	Finland	NordGen	https://www.nordgen.org/en/our-work/nordgen-plants/seed-and-potato-requests/
52	PI 390153	Uncertain	Pakistan	NGPS Gene bank	https://npgsweb.ars-grin.gov/gringlobal/accessionDetail.aspx?id=1293101
53	FAB 5911	Traditional cultivar/landrace	Egypt	IPK Gatersleben	https://gbis.ipk-gatersleben.de/gbis2i/faces/pages/detail.jsf?akzessionId=248218
54	Pihronen	Traditional cultivar/landrace	Finland	NordGen	https://www.nordgen.org/en/our-work/nordgen-plants/seed-and-potato-requests/
55	Entry No. 117	Cultivated material	Egypt	NGPS Gene bank	https://npgsweb.ars-grin.gov/gringlobal/accessionDetail.aspx?id=1364093
56	Trumpet	Variety	Germany	NPZ	https://www.npz.de/en/varieties/field-beans/
57	Blase spring bean	Advanced/improved cultivar	United Kingdom	IPK Gatersleben	https://gbis.ipk-gatersleben.de/gbis2i/faces/pages/detail.jsf?akzessionId=260739
58	Tinova	Variety	Germany	JIC Germplasm Resource Unit	https://www.jic.ac.uk/research-impact/germplasm-resource-unit/
59	Russkije cernyje	Advanced/improved cultivar	Russia	IPK Gatersleben	https://gbis.ipk-gatersleben.de/gbis2i/faces/pages/detail.jsf?akzessionId=248486
60	Tina	Variety	Germany	JIC Germplasm Resource Unit	https://www.jic.ac.uk/research-impact/germplasm-resource-unit/
61	B 19	Breeding/research material	Sweden	IPK Gatersleben	https://gbis.ipk-gatersleben.de/gbis2i/faces/pages/detail.jsf?akzessionId=32868
62	Major	Vegetable variety	Poland	IPK Gatersleben	https://gbis.ipk-gatersleben.de/gbis2i/faces/pages/detail.jsf?akzessionId=32631
63	SWING	Advanced/improved cultivar	Sweden	IPK Gatersleben	https://gbis.ipk-gatersleben.de/gbis2i/faces/pages/detail.jsf?akzessionId=235337
64	Oena	Variety	Poland	Danko	https://danko.pl/en/main-page/
65	FAB 6774	Traditional cultivar/landrace	United States	IPK Gatersleben	https://gbis.ipk-gatersleben.de/gbis2i/faces/pages/detail.jsf?akzessionId=239034
66	Banquise	Variety	United Kingdom	Limagrain	https://www.lgseeds.co.uk/crops/pulses/
67	Gloria	Variety	Germany	Saatzucht Gleisdorf GmbH	https://www.saatzuchtgleisdorf.at/
68	FAB 443	Traditional cultivar/landrace	Syria	IPK Gatersleben	https://gbis.ipk-gatersleben.de/gbis2i/faces/pages/detail.jsf?akzessionId=32860
69	Dregers Ackerbohne	Advanced/improved cultivar	Germany	IPK Gatersleben	https://gbis.ipk-gatersleben.de/gbis2i/faces/pages/detail.jsf?akzessionId=32479
70	ATC 65348	Cultivated material	China	NGPS Gene bank	https://npgsweb.ars-grin.gov/gringlobal/accessionDetail.aspx?id=1789185
71	TJK2006:265	Cultivated material	Italy	NGPS Gene bank	https://npgsweb.ars-grin.gov/gringlobal/accessionDetail.aspx?id=1550052
72	Oldambtster	Advanced/improved cultivar	Germany	IPK Gatersleben	https://gbis.ipk-gatersleben.de/gbis2i/faces/pages/detail.jsf?akzessionId=32516
73	Lövånger	Traditional cultivar/landrace	Sweden	NordGen	https://www.nordgen.org/en/our-work/nordgen-plants/seed-and-potato-requests/
74	IQ 220004	Cultivated material	Iraq	NGPS Gene bank	https://npgsweb.ars-grin.gov/gringlobal/accessionDetail.aspx?id=1472695
75	B 12	Breeding/research material	Sweden	IPK Gatersleben	https://gbis.ipk-gatersleben.de/gbis2i/faces/pages/detail.jsf?akzessionId=32867
76	Qing hai 4	Variety	China	IPK Gatersleben	https://gbis.ipk-gatersleben.de/gbis2i/faces/pages/detail.jsf?akzessionId=60069
77	FAB 6144	Traditional cultivar/landrace	Turkey	IPK Gatersleben	https://gbis.ipk-gatersleben.de/gbis2i/faces/pages/detail.jsf?akzessionId=254297
78	Brottby	Traditional cultivar/landrace	Sweden	Nordgen	https://www.nordgen.org/en/our-work/nordgen-plants/seed-and-potato-requests/
79	NADWISLANSKIJ	Variety	Poland	IPK Gatersleben	https://gbis.ipk-gatersleben.de/gbis2i/faces/pages/detail.jsf?akzessionId=224578
80	Krasnojarskie	Advanced/improved cultivar	Sovjet Union	IPK Gatersleben	https://gbis.ipk-gatersleben.de/gbis2i/faces/pages/detail.jsf?akzessionId=32628
81	Dreadnought	Variety	United Kingdom	IPK Gatersleben	https://gbis.ipk-gatersleben.de/gbis2i/faces/pages/detail.jsf?akzessionId=32431
82	Nadwislanski Nr. 10	Advanced/improved cultivar	Poland	IPK Gatersleben	https://gbis.ipk-gatersleben.de/gbis2i/faces/pages/detail.jsf?akzessionId=32742
83	Giant white	Advanced/improved cultivar	United Kingdom	NGPS Gene bank	https://npgsweb.ars-grin.gov/gringlobal/accessionDetail.aspx?id=1364128
84	WJK 22	Wild material	Syria	NGPS Gene bank	https://npgsweb.ars-grin.gov/gringlobal/AccessionObservation.aspx?id=1021771
85	Hangdown	Variety	United Kingdom	IPK Gatersleben	https://gbis.ipk-gatersleben.de/gbis2i/faces/pages/detail.jsf?akzessionId=256686
86	Korunda	Advanced/improved cultivar	Kenya	NGPS Gene bank	https://npgsweb.ars-grin.gov/gringlobal/accessionDetail.aspx?id=1932638
87	320	Cultivated material	Morocco	NGPS Gene bank	https://npgsweb.ars-grin.gov/gringlobal/accessionDetail.aspx?id=1364145
88	Entry No. 111	Cultivated material	Iran	NGPS Gene bank	https://npgsweb.ars-grin.gov/gringlobal/accessionDetail.aspx?id=1364087
89	Fernando	Variety	Poland	Strzelce	https://hr-strzelce.pl/odmiany/bobik/
90	FAB 23	Traditional cultivar/landrace	Greece	IPK Gatersleben	https://gbis.ipk-gatersleben.de/gbis2i/faces/pages/detail.jsf?akzessionId=32448
91	FAB 534	Traditional cultivar/landrace	Poland	IPK Gatersleben	https://gbis.ipk-gatersleben.de/gbis2i/faces/pages/detail.jsf?akzessionId=59839
92	GL Sunrise	Variety	Austria	Saatzucht Gleisdorf GmbH	https://www.saatzuchtgleisdorf.at/
93	Svetlosemjannye	Traditional cultivar/landrace	Russia	IPK Gatersleben	https://gbis.ipk-gatersleben.de/gbis2i/faces/pages/detail.jsf?akzessionId=59830
94	Syria local small	Breeding/research material	Syria	IPK Gatersleben	https://gbis.ipk-gatersleben.de/gbis2i/faces/pages/detail.jsf?akzessionId=252657
95	Gigantic green long pod	Advanced/improved cultivar	United Kingdom	NGPS Gene bank	https://npgsweb.ars-grin.gov/gringlobal/accessionDetail.aspx?id=1364052
96	Solberga	Traditional cultivar/landrace	Sweden	NordGen	https://www.nordgen.org/en/our-work/nordgen-plants/seed-and-potato-requests/
97	BROCAL	Variety	Spain	IPK Gatersleben	https://gbis.ipk-gatersleben.de/gbis2i/faces/pages/detail.jsf?akzessionId=248478
98	Pacae Verde	Advanced/improved cultivar	Peru	IPK Gatersleben	https://gbis.ipk-gatersleben.de/gbis2i/faces/pages/detail.jsf?akzessionId=59813
99	FAB 477	Traditional cultivar/landrace	Etiopia	IPK Gatersleben	https://gbis.ipk-gatersleben.de/gbis2i/faces/pages/detail.jsf?akzessionId=59782
100	Solomon 87002	Advanced/improved cultivar	United states	NGPS Gene bank	https://npgsweb.ars-grin.gov/gringlobal/accessionDetail.aspx?id=1472714
101	ATC 63759	Cultivated material	China	NGPS Gene bank	https://npgsweb.ars-grin.gov/gringlobal/AccessionObservation.aspx?id=1789155
102	ATC 63749	Cultivated material	China	NGPS Gene bank	https://npgsweb.ars-grin.gov/gringlobal/accessionDetail.aspx?id=1789148
103	Mikko	Variety	Finland	Hankkija's Breeding Institute	https://www.nordgen.org/en/our-work/nordgen-plants/seed-and-potato-requests/
104	FAB 533	Traditional cultivar/landrace	Poland	IPK Gatersleben	https://gbis.ipk-gatersleben.de/gbis2i/faces/pages/detail.jsf?akzessionId=59838
105	Sanukinagasaya	Advanced/improved cultivar	Japan	IPK Gatersleben	https://gbis.ipk-gatersleben.de/gbis2i/faces/pages/detail.jsf?akzessionId=249591
106	Piacentino	Uncertain	Italy	NGPS Gene bank	https://npgsweb.ars-grin.gov/gringlobal/accessionDetail.aspx?id=1212147
107	Vígl'assky	Advanced/improved cultivar	Czechoslovakia	IPK Gatersleben	https://gbis.ipk-gatersleben.de/gbis2i/faces/pages/detail.jsf?akzessionId=32704
108	Lielplatonskij	Traditional cultivar/landrace	Latvia	IPK Gatersleben	https://gbis.ipk-gatersleben.de/gbis2i/faces/pages/detail.jsf?akzessionId=32615
109	CHA CHA	Advanced/improved cultivar	Mexico	IPK Gatersleben	https://gbis.ipk-gatersleben.de/gbis2i/faces/pages/detail.jsf?akzessionId=238517
110	ATC 63776	Cultivated material	China	NGPS Gene bank	https://npgsweb.ars-grin.gov/gringlobal/accessionDetail.aspx?id=1789172
111	ALBOREDA	Advanced/improved cultivar	Spain	NGPS Gene bank	https://npgsweb.ars-grin.gov/gringlobal/accessionDetail.aspx?id=1472700
112	Laura	Variety	Germany	NordGen	https://www.nordgen.org/en/our-work/nordgen-plants/seed-and-potato-requests/
113	QILLA	Traditional cultivar/landrace	Yemen	IPK Gatersleben	https://gbis.ipk-gatersleben.de/gbis2i/faces/pages/detail.jsf?akzessionId=229773
114	Grebo	Traditional cultivar/landrace	Sweden	NordGen	https://www.nordgen.org/en/our-work/nordgen-plants/seed-and-potato-requests/
115	Ticol HÖG	Breeding/research material	United Kingdom	JIC Germplasm Resource Unit	https://www.jic.ac.uk/research-impact/germplasm-resource-unit/
116	870525-01	Cultivated material	Spain	NGPS Gene bank	https://npgsweb.ars-grin.gov/gringlobal/accessionDetail.aspx?id=1428665
117	Green masterpiece	Advanced/improved cultivar	United Kingdom	NGPS Gene bank	https://npgsweb.ars-grin.gov/gringlobal/accessionDetail.aspx?id=1364132
118	Cochinera	Traditional cultivar/landrace	Spain	IPK Gatersleben	https://gbis.ipk-gatersleben.de/gbis2i/faces/pages/detail.jsf?akzessionId=77433
119	Arla	Variety	Sweden	IPK Gatersleben	https://gbis.ipk-gatersleben.de/gbis2i/faces/pages/detail.jsf?akzessionId=261284
120	II-11-38	Uncertain	Hungary	NGPS Gene bank	https://npgsweb.ars-grin.gov/gringlobal/accessionDetail.aspx?id=1325690
121	388	Uncertain	Nepal	NGPS Gene bank	https://npgsweb.ars-grin.gov/gringlobal/accessionDetail.aspx?id=1313095
122	FAB 538	Traditional cultivar/landrace	Georgia	IPK Gatersleben	https://gbis.ipk-gatersleben.de/gbis2i/faces/pages/detail.jsf?akzessionId=59843
123	FAB 6359	Wild material	Afganistan	IPK Gatersleben	https://gbis.ipk-gatersleben.de/gbis2i/faces/pages/detail.jsf?akzessionId=250682
124	Fuego	Variety	United Kingdom	NPZ	https://www.npz.de/en/varieties/field-beans/
125	FAB 590	Traditional cultivar/landrace	Poland	IPK Gatersleben	https://gbis.ipk-gatersleben.de/gbis2i/faces/pages/detail.jsf?akzessionId=82652
126	FAB 587	Traditional cultivar/landrace	Georgia	IPK Gatersleben	https://gbis.ipk-gatersleben.de/gbis2i/faces/pages/detail.jsf?akzessionId=84283
127	COLUMBA	Advanced/improved cultivar	France	IPK Gatersleben	https://gbis.ipk-gatersleben.de/gbis2i/faces/pages/detail.jsf?akzessionId=225283
128	FR 1	Breeding/research material	Sweden	IPK Gatersleben	https://gbis.ipk-gatersleben.de/gbis2i/faces/pages/detail.jsf?akzessionId=33390
129	Crimson Flowered	Variety	United Kingdom	Impecta	https://www.impecta.se/
130	FAB 6934	Traditional cultivar/landrace	Spain	IPK Gatersleben	https://gbis.ipk-gatersleben.de/gbis2i/faces/pages/detail.jsf?akzessionId=32916
131	cerevi	Traditional cultivar/landrace	Georgia	IPK Gatersleben	https://gbis.ipk-gatersleben.de/gbis2i/faces/pages/detail.jsf?akzessionId=83696
132	FAB 15	Traditional cultivar/landrace	Turkey	IPK Gatersleben	https://gbis.ipk-gatersleben.de/gbis2i/faces/pages/detail.jsf?akzessionId=32441
133	Vaksala torg	Traditional cultivar/landrace	Sweden	NordGen	https://www.nordgen.org/en/our-work/nordgen-plants/seed-and-potato-requests/
134	Manholts	Advanced/improved cultivar	Holland	IPK Gatersleben	https://gbis.ipk-gatersleben.de/gbis2i/faces/pages/detail.jsf?akzessionId=250622
135	Robin Hood	Variety	United Kingdom	Thompson & Morgan	https://www.thompson-morgan.com/
136	Sv 0620	Breeding/research material	Sweden	IPK Gatersleben	https://gbis.ipk-gatersleben.de/gbis2i/faces/pages/detail.jsf?akzessionId=32865
137	ATC 65361	Cultivated material	China	NGPS Gene bank	https://npgsweb.ars-grin.gov/gringlobal/accessionDetail.aspx?id=1789194
138	Ascott	Variety	France	IPK Gatersleben	https://gbis.ipk-gatersleben.de/gbis2i/faces/pages/detail.jsf?akzessionId=32467
139	Åsbro	Traditional cultivar/landrace	Sweden	NordGen	https://www.nordgen.org/en/our-work/nordgen-plants/seed-and-potato-requests/
140	ATC 63750	Cultivated material	China	NGPS Gene bank	https://npgsweb.ars-grin.gov/gringlobal/accessionDetail.aspx?id=1789149
141	WJK-PRC-83	Wild material	China	NGPS Gene bank	https://npgsweb.ars-grin.gov/gringlobal/accessionDetail.aspx?id=1472720
142	ATC 62953	Cultivated material	China	NGPS Gene bank	https://npgsweb.ars-grin.gov/gringlobal/accessionDetail.aspx?id=1789141
143	ATC 63746	Cultivated material	China	NGPS Gene bank	https://npgsweb.ars-grin.gov/gringlobal/accessionDetail.aspx?id=1789145
144	Organdi	Variety	France	Agri obtentions	http://www.agriobtentions.com/pulses/field-bean.html
145	Broad Windsor	Advanced/improved cultivar	United Kingdom	IPK Gatersleben	https://gbis.ipk-gatersleben.de/gbis2i/faces/pages/detail.jsf?akzessionId=59774
146	Tiffany	Variety	United Kingdom	NPZ	https://www.npz.de/en/varieties/field-beans/
147	Rebaya 40	Breeding/research material	Egypt	IPK Gatersleben	https://gbis.ipk-gatersleben.de/gbis2i/faces/pages/detail.jsf?akzessionId=32714
148	ATC 65347	Cultivated material	China	NGPS Gene bank	https://npgsweb.ars-grin.gov/gringlobal/accessionDetail.aspx?id=1789184
149	Bingo	Variety	Germany	NordGen	https://www.nordgen.org/en/our-work/nordgen-plants/seed-and-potato-requests/
150	347-2	Wild material	Bulgaria	NGPS Gene bank	https://npgsweb.ars-grin.gov/gringlobal/AccessionObservation.aspx?id=1058718
151	Souk el arba	Traditional cultivar/landrace	Morocco	IPK Gatersleben	https://gbis.ipk-gatersleben.de/gbis2i/faces/pages/detail.jsf?akzessionId=239060
152	LG Cartouche	Vegetable variety	United Kingdom	Limagrain	https://www.lgseeds.co.uk/crops/pulses/
153	Ashleigh	Variety	Poland	Danko	https://danko.pl/en/main-page/
154	The Sutton	Variety	United Kingdom	Thompson & Morgan	https://www.thompson-morgan.com/
155	Nagasaya	Advanced/improved cultivar	Japan	IPK Gatersleben	https://gbis.ipk-gatersleben.de/gbis2i/faces/pages/detail.jsf?akzessionId=238542
156	Karmazyn	Vegetable variety	Poland	Impecta	https://www.impecta.se/
157	FAB 6573	Traditional cultivar/landrace	Sweden	IPK Gatersleben	https://gbis.ipk-gatersleben.de/gbis2i/faces/pages/detail.jsf?akzessionId=234261
158	Priekul'skij 32	Advanced/improved cultivar	Latvia	IPK Gatersleben	https://gbis.ipk-gatersleben.de/gbis2i/faces/pages/detail.jsf?akzessionId=32759
159	B 2	Breeding/research material	Sweden	IPK Gatersleben	https://gbis.ipk-gatersleben.de/gbis2i/faces/pages/detail.jsf?akzessionId=32866
160	Ticol LÅG	Breeding/research material	United Kingdom	JIC Germplasm Resource Unit	https://www.jic.ac.uk/research-impact/germplasm-resource-unit/
161	Jygeva	Advanced/improved cultivar	Estonia	IPK Gatersleben	https://gbis.ipk-gatersleben.de/gbis2i/faces/pages/detail.jsf?akzessionId=32758
162	FAB 5076	Breeding/research material	Germany	IPK Gatersleben	https://gbis.ipk-gatersleben.de/gbis2i/faces/pages/detail.jsf?akzessionId=246805
163	AKZENT	Variety	Germany	IPK Gatersleben	https://gbis.ipk-gatersleben.de/gbis2i/faces/pages/detail.jsf?akzessionId=224238
164	FAB 464	Traditional cultivar/landrace	Poland	IPK Gatersleben	https://gbis.ipk-gatersleben.de/gbis2i/faces/pages/detail.jsf?akzessionId=32881
165	Gubbestad	Traditional cultivar/landrace	Sweden	NordGen	https://www.nordgen.org/en/our-work/nordgen-plants/seed-and-potato-requests/
166	FAB 6523	Traditional cultivar/landrace	Yugoslavia	IPK Gatersleben	https://gbis.ipk-gatersleben.de/gbis2i/faces/pages/detail.jsf?akzessionId=259604
167	FAB 6537	Traditional cultivar/landrace	Australia	IPK Gatersleben	https://gbis.ipk-gatersleben.de/gbis2i/faces/pages/detail.jsf?akzessionId=228159
168	Chishminskie	Advanced/improved cultivar	Russia	IPK Gatersleben	https://gbis.ipk-gatersleben.de/gbis2i/faces/pages/detail.jsf?akzessionId=32825
169	Lynx	Variety	United Kingdom	NPZ	https://www.npz.de/en/varieties/field-beans/
170	favada	Traditional cultivar/landrace	Georgia	IPK Gatersleben	https://gbis.ipk-gatersleben.de/gbis2i/faces/pages/detail.jsf?akzessionId=99198
171	Mandolin	Variety	France	INRA/Serasem
172	Witkiem	Vegetable variety	Unknown	Runåbergs Fröer	https://www.runabergsfroer.se/
173	FAB 6993	Traditional cultivar/landrace	Georgia	IPK Gatersleben	https://gbis.ipk-gatersleben.de/gbis2i/faces/pages/detail.jsf?akzessionId=83572
174	Vega	Variety	Sweden	Svalöv	https://www.nordgen.org/en/our-work/nordgen-plants/seed-and-potato-requests/
175	FAB 6894	Traditional cultivar/landrace	Poland	IPK Gatersleben	https://gbis.ipk-gatersleben.de/gbis2i/faces/pages/detail.jsf?akzessionId=33420
176	FAB 606	Traditional cultivar/landrace	China	IPK Gatersleben	https://gbis.ipk-gatersleben.de/gbis2i/faces/pages/detail.jsf?akzessionId=33413
177	Medina	Variety	France	Agri Obtentions	http://www.agriobtentions.com/pulses/field-bean.html
178	Nanaux	Variety	France	Agri Obtentions	http://www.agriobtentions.com/pulses/field-bean.html
179	Boxer	Variety	Germany	NordGen	https://www.nordgen.org/en/our-work/nordgen-plants/seed-and-potato-requests/
180	FAB 624	Traditional cultivar/landrace	Etiopia	IPK Gatersleben	https://gbis.ipk-gatersleben.de/gbis2i/faces/pages/detail.jsf?akzessionId=33093
181	Louhi	Variety	Finland	Boreal	https://boreal.fi/sv/sorter/bondbona/
182	Apollo	Variety	Germany	PH Petersen	https://www.phpetersen.com/en/products/legumes/field-bean/
183	FR 48	Breeding/research material	Sweden	IPK Gatersleben	https://gbis.ipk-gatersleben.de/gbis2i/faces/pages/detail.jsf?akzessionId=32815
184	V.F.13825	Advanced/improved cultivar	Australia	IPK Gatersleben	https://gbis.ipk-gatersleben.de/gbis2i/faces/pages/detail.jsf?akzessionId=238497
185	Primus	Variety	Sweden	Svalöf	https://www.nordgen.org/en/our-work/nordgen-plants/seed-and-potato-requests/
186	Habas de Beck	Traditional cultivar/landrace	Spain	IPK Gatersleben	https://gbis.ipk-gatersleben.de/gbis2i/faces/pages/detail.jsf?akzessionId=59815
187	Dagestanskij M.	Traditional cultivar/landrace	Russia	IPK Gatersleben	https://gbis.ipk-gatersleben.de/gbis2i/faces/pages/detail.jsf?akzessionId=32613
188	GIZA 1	Traditional cultivar/landrace	Egypt	IPK Gatersleben	https://gbis.ipk-gatersleben.de/gbis2i/faces/pages/detail.jsf?akzessionId=32894
189	haba "chata"	Traditional cultivar/landrace	Peru	IPK Gatersleben	https://gbis.ipk-gatersleben.de/gbis2i/faces/pages/detail.jsf?akzessionId=82608
190	rogv	Traditional cultivar/landrace	Georgia	IPK Gatersleben	https://gbis.ipk-gatersleben.de/gbis2i/faces/pages/detail.jsf?akzessionId=2058999
191	Scalar	Advanced/improved cultivar	Unknown	Unknown
192	ATC 63766	Cultivated material	China	NGPS Gene bank	https://npgsweb.ars-grin.gov/gringlobal/accessionDetail.aspx?id=1789162
193	4-67-A	Breeding/research material	Italy	IPK Gatersleben	https://gbis.ipk-gatersleben.de/gbis2i/faces/pages/detail.jsf?akzessionId=223376
194	FAB 513	Traditional cultivar/landrace	Australia	IPK Gatersleben	https://gbis.ipk-gatersleben.de/gbis2i/faces/pages/detail.jsf?akzessionId=59818
195	Pirkkonen	Advanced/improved cultivar	Finland	IPK Gatersleben	https://gbis.ipk-gatersleben.de/gbis2i/faces/pages/detail.jsf?akzessionId=32654
196	FAB 7464	Traditional cultivar/landrace	Slovakia	IPK Gatersleben	https://gbis.ipk-gatersleben.de/gbis2i/faces/pages/detail.jsf?akzessionId=99193
197	Bruno	Variety	Germany	JIC Germplasm Resource Unit	https://www.jic.ac.uk/research-impact/germplasm-resource-unit/
198	TP 3930 / SJOEDIN	Breeding/research material	Sweden	IPK Gatersleben	https://gbis.ipk-gatersleben.de/gbis2i/faces/pages/detail.jsf?akzessionId=230174
199	Claudia	Variety	France	IPK Gatersleben	https://gbis.ipk-gatersleben.de/gbis2i/faces/pages/detail.jsf?akzessionId=33399
200	Taifun	Variety	Germany	NPZ	https://www.npz.de/en/varieties/field-beans/
201	PI 244063	Cultivated material	Yemen	NGPS Gene bank	https://npgsweb.ars-grin.gov/gringlobal/accessionDetail.aspx?id=1188677
202	Columbo	Variety	Denmark	IPK Gatersleben	https://gbis.ipk-gatersleben.de/gbis2i/faces/pages/detail.jsf?akzessionId=7708376
203	Chorostovskij	Advanced/improved cultivar	Ukraine	IPK Gatersleben	https://gbis.ipk-gatersleben.de/gbis2i/faces/pages/detail.jsf?akzessionId=32612
204	FAB 346	Traditional cultivar/landrace	Lithuania	IPK Gatersleben	https://gbis.ipk-gatersleben.de/gbis2i/faces/pages/detail.jsf?akzessionId=32763
205	LINIA CLUJ 44-60	Breeding/research material	Romania	IPK Gatersleben	https://gbis.ipk-gatersleben.de/gbis2i/faces/pages/detail.jsf?akzessionId=248178
206	Nakka	Variety	France	Agri Obtentions	http://www.agriobtentions.com/pulses/field-bean.html
207	FAB 6522	Traditional cultivar/landrace	Australia	IPK Gatersleben	https://gbis.ipk-gatersleben.de/gbis2i/faces/pages/detail.jsf?akzessionId=223840
208	METISSA	Variety	Holland	IPK Gatersleben	https://gbis.ipk-gatersleben.de/gbis2i/faces/pages/detail.jsf?akzessionId=238538
209	E92-15	Cultivated material	Egypt	NGPS Gene bank	https://npgsweb.ars-grin.gov/gringlobal/accessionDetail.aspx?id=1472710
210	Red Epicure	Variety	Sweden	NordGen	https://www.nordgen.org/en/our-work/nordgen-plants/seed-and-potato-requests/
211	FAB 7014	Traditional cultivar/landrace	Poland	IPK Gatersleben	https://gbis.ipk-gatersleben.de/gbis2i/faces/pages/detail.jsf?akzessionId=88374
212	Paloma	Variety	United Kingdom	Unknown
213	CHIOKKA	Advanced/improved cultivar	Sovjet Union	IPK Gatersleben	https://gbis.ipk-gatersleben.de/gbis2i/faces/pages/detail.jsf?akzessionId=243837
214	FAB 5062	Breeding/research material	Germany	IPK Gatersleben	https://gbis.ipk-gatersleben.de/gbis2i/faces/pages/detail.jsf?akzessionId=239095
215	Sampo	Variety	Finland	Boreal	https://boreal.fi/sv/sorter/bondbona/
216	Yuraq habas.	Cultivated material	Peru	NGPS Gene bank	https://npgsweb.ars-grin.gov/gringlobal/accessionDetail.aspx?id=1405526
217	Honey	Variety	France	Wherry and Sons Ltd.	http://www.agriobtentions.com/pulses/field-bean.html
218	ATC 63752	Cultivated material	China	NGPS Gene bank	https://npgsweb.ars-grin.gov/gringlobal/accessionDetail.aspx?id=1789151
219	Tarragona	Traditional cultivar/landrace	Spain	IPK Gatersleben	https://gbis.ipk-gatersleben.de/gbis2i/faces/pages/detail.jsf?akzessionId=77432
220	ATC 63755	Cultivated material	China	NGPS Gene bank	https://npgsweb.ars-grin.gov/gringlobal/accessionDetail.aspx?id=1789153

## Sheet: Screening abbreviations
Abbreviation	Full description	Comment/explanation/method
FT21	Field Trial 2021	Seeds are hand-sown (14-16 April) in parcels of 1*0.75 m with an approx density of 66 seeds/m2 and approx seed distance of 15 cm. Seeds are surface sterilized. Seeds derive from isolated parental material.
FT 22	Field Trial 2022	Seeds are hand-sown (12-14 Apil) in parcels of 1*0.75 m with an approx density of 66 seeds/m2 and approx seed distance of 15 cm. Seeds are not surface sterilized. Seeds derive from non-isolated parental material from harvest of FT21.
rep 1	Replicate 1	20*11 parcels
rep 2	Replicate 2	20*11 parcels
EST	establishment	% of established plants after 33 days for FT21 and 34-36 days for FT22
FLOW	flowering	Days from sowing to bloom. *In bloom = >50% of the established plants in a plot had at least one open flower.
HEIGHT	height	Average height of 5 plants/plot. Measured at X days after sowing
MAT	maturity	Days from sowing to maturity *Mature = >50% of the established plants in a plot have filled, black/dry pods
TGW	thousand grain weight	weight of 1000 seeds (g)
YIELD	yield	weight seeds/plants (g)
SIZE	size	seed area
WEEV	bean weevil attacks	% infested seeds
SEED	no seeds/plant	Number of seeds per plant
PROTEIN	protein content	% protein in dry weight, raw protein acc. to Dumas (Nx6.25) - (g/100 g)
STARCH	starch content	% starch in dry weight

## Sheet: Phenotype raw data
SLU ID	EST_FT21_rep1 (%)	EST_FT21_rep2 (%)	EST_FT22_rep1 (%)	EST_FT22_rep2 (%)	FLOW_FT21_rep1 (days)	FLOW_FT21_rep2 (days)	FLOW_FT22_rep1 (days)	FLOW_FT22_rep2 (days)	HEIGHT_FT21_rep1 (cm)	HEIGHT_FT21_rep2 (cm)	HEIGHT_FT22_rep1 (cm)	HEIGHT_FT22_rep2 (cm)	MAT_FT21_rep1 (days)	MAT_FT21_rep2 (days)	MAT_FT22_rep1 (days)	MAT_FT22_rep2 (days)	TGW_FT21 rep1 (g)	TGW_FT21 rep2 (g)	TGW_FT22 rep1 (g)	TGW_FT22 rep2 (g)	YIELD_FT21 rep1 (g)	YIELD_FT21 rep2 (g)	YIELD_FT22 rep1 (g)	YIELD_FT22 rep2 (g)	SIZE_FT21 rep1 (mm²)	SIZE_FT21 rep2 (mm²)	SIZE_FT22 rep1 (mm²)	SIZE_FT22 rep2 (mm²)	WIDTH_FT21 rep1 (mm)	WIDTH_FT21 rep2 (mm)	WIDTH_FT22 rep1 (mm)	WIDTH_FT22 rep2 (mm)	LENGTH_FT21 rep1 (mm)	LENGTH_FT21 rep2 (mm)	LENGTH_FT22 rep1 (mm)	LENGTH_FT22 rep2 (mm)	SEEDS_FT21 rep1	SEEDS_FT21 rep2	SEEDS_FT22 rep1	SEEDS_FT22 rep2	PROTEIN_FT21 rep1	PROTEIN_FT21 rep 2	STARCH_FT21 rep 1	STARCH_FT21 rep2	WEEV_FT21_rep1 (%)	WEEV_FT21_rep2 (%)
1	98	88	80	76	58	60	59	57	75.2	64.8	75.8	102.2	105	103	118	116	481.43	544	607.59	643.43	8.90495	10.3896	13.9982	14.8084	89.5	97.5	98.3	107.4	9.2	9.7	9.9	10.3	12.5	12.9	12.8	13.2	18.4969	19.0985	23.039	23.0148	29	31.2	28.0546	32.9639	64	85
2	100	100	90	84	62	60	62	64	83.4	91.6	101.8	114.4	105	103	112	111	396.34	383.13	421.71	475.47	9.12945	12.7777	10.6502	14.3707	69.9	66.6	72.5	78.4	8.4	8.3	8.6	8.9	10.8	10.5	10.8	11.4	23.0343	33.3509	25.2548	30.2242	29.5	31	33.9537	33.9633	42	53
3	98	96	88	86	58	56	56	55	68.2	72	76.6	94	105	103	104	106	545.37	519.21	528.66	678.91	8.99474	10.7286	8.29386	13.8337	105.7	103.2	100.3	124.1	10	9.9	10	11	13.6	13.4	12.8	14.4	16.4929	20.6631	15.6885	20.3764	29	30.4	30.5594	31.536	94	91
4	100	94	64	72	54	52	52	50	72.4	63.9	62.4	81.2	105	96	107	102	888.16	799.61	828.9	904.8	11.2617	10.2337	8.70906	15.1519	193.1	174.2	164	182.7	13.5	12.9	12.5	13.1	18.4	17.4	16.7	17.7	12.6798	12.7983	10.5068	16.7462	27.6	27.6	31.4115	31.0998	97	97
5	98	92	86	92	58	56	56	55	69.8	66.6	79.6	75.2	105	103	112	103	940.84	1043.74	1064.46	946.85	10.6803	7.46766	9.90837	5.23239	198.9	210.1	201.7	185.8	13.8	14.3	14.2	13.6	18.6	18.8	18.5	17.5	11.3518	7.15472	9.30836	5.5261	27.9	28.9	29.8561	30.4813	94	94
6	97.8261	97.8261	88	84	58	60	59	60	64.7	62.8	81.8	95	105	103	107	102	632.64	549.06	663.96	581.42	6.55294	7.78894	12.4516	12.7121	128.4	119.6	129.1	110.5	10.9	10.7	11.1	10.3	14.9	14.4	14.9	13.7	10.358	14.1859	18.7535	21.864	28.5	28.7	33.1952	30.9098	95	92
7	85.1064	95.7447	76	88	58	56	56	54	77.4	77.6	80	92.8	105	103	107	110	841.65	849.1	804.71	920	8.39781	9.79228	9.57763	10.7168	188	180.7	165.7	189.9	13.5	13.4	12.8	13.6	18	17.4	16.6	17.8	9.97778	11.5325	11.902	11.6487	26.6	31.1	30.5808	29.1918	92	99
8	72	64	74	86	58	56	56	57	51.8	57.4	79	88.6	105	103	104	105	360.75	421.72	476.08	517.54	7.70701	13.927	12.7116	9.18256	79.1	81.1	86.3	93.4	8.6	8.6	9.2	9.5	11.9	12	11.9	12.4	21.3638	33.0238	26.7006	17.7427	32.4	29.6	29.6783	33.6592	92	93
9	94	98	94	86	65	63	65	68	64.5	56.7	101.4	89.8	105	103	112	111	398.37	380.85	424.26	413.1	7.60707	9.14781	9.90362	5.22209	72.9	68.4	74	74.7	8.7	8.4	8.7	8.7	11.1	10.7	11.2	11.1	19.0956	24.0198	23.3433	12.6412	31.3	33.8	30.8056	31.9465	54	67
10	82.5	75	82	70	54	52	56	54	65.5	75.7	85.8	100.4	105	96	104	102	523.31	431.26	624.96	613.24	8.11129	9.78142	11.8805	10.3806	112.4	101	119.9	116.4	10.6	10.1	10.9	10.7	13.9	13.3	14.3	14.1	15.4999	22.6813	19.01	16.9274	32.1	31.8	30.4745	28.0332	79	84
11	98	68	78	78	62	60	62	63	61.9	58.6	78.8	97.4	105	103	107	110	198.42	213.08	339.11	349.33	2.92413	4.6789	7.12641	7.53385	48.5	49	62.1	62.6	7.2	7.2	8.2	8.2	9	9	9.9	10	14.7372	21.9579	21.015	21.5666	30.8	32.6	27.5843	27.2453	72	71
12	94.5946	94.5946	84	92	68	63	59	61	61.4	66.9	86.2	96.2	105	96	112	111	632.62	582.8	747.48	778.86	6.49807	8.88979	9.03786	11.025	127.7	118.6	136.4	137.5	11.2	10.9	11.8	11.7	14.8	14.1	14.9	15	10.2717	15.2535	12.0911	14.1553	28.9	33.2	31.3955	29.091	84	95
13	92	92	94	82	62	60	59	60	73.8	83.2	116.4	105.6	105	103	112	110	502.62	519.04	577.65	618.5	9.29201	17.4824	11.6577	16.1424	91.9	90.8	98.8	104.7	9.5	9.6	10	10.2	12.5	12.4	12.7	13.2	18.4871	33.6821	20.1812	26.0993	30.2	30.4	31.7213	33.6137	59	65
14	60	86	92	98	58	56	52	50	63.8	69.5	84.4	95.8	105	103	107	102	937.85	763.94	1020.39	991.54	11.6331	12.9228	13.1657	12.7965	185	172	202.2	187.8	13.6	13	14.3	13.7	17.6	16.9	18.2	17.7	12.404	16.916	12.9026	12.9057	29	29.6	34.2886	28.4755	90	88
15	90	96	88	78	62	60	62	60	75	81.8	81	82.4	105	103	112	116	356.48	353.18	461.43	599.71	9.59628	11.3636	11.823	16.7631	69.8	67.4	76.7	90.2	8.1	7.9	8.8	9.4	11.1	11	11.3	12.4	26.9194	32.1749	25.6224	27.952	25.1	30.9	37.1449	31.8963	76	84
16	93.0233	95.3488	58	60	58	56	59	57	67.2	70.1	72.4	86.2	98	96	104	102	487.42	483.47	535.04	553.71	2.36831	5.45665	9.47	7.80667	107.7	104.1	104.6	104.3	10.2	10.1	10.1	10.2	13.6	13.4	13.4	13.1	4.85888	11.2865	17.6996	14.0988	32.4	34.5	31.2687	30.9762	99	96
17	76	86	82	74	62	60	62	61	53	57.9	81	72.8	105	103	104	103	880.33	911.63	823.73	772.22	4.8577	6.17169	9.36707	9.44973	203.5	212.6	164.1	149.2	14.4	14.6	12.8	12.2	18.3	18.8	16.5	15.7	5.51802	6.76998	11.3715	12.2371	28.4	26.9	34.2522	32.8411	78	93
18	100	100	74	88	62	60	62	64	82	86.4	112.8	93.2	105	103	112	111	306.54	352.29	379.02	366.98	9.43005	11.3307	13.1078	14.9264	57.2	63.8	68.1	63.9	7.6	8.1	8.3	8.2	9.7	10.2	10.6	10.1	30.7632	32.1632	34.5835	40.6735	31.1	33.4	34.7986	33.7736	76	69
19	90	92	78	94	65	63	62	61	69.2	70.8	83.2	89.4	105	103	112	111	326.73	420.35	463.79	554.75	8.75406	12.5668	13.0467	12.6615	71.3	80.8	86.1	96.4	8.2	8.9	9.2	9.6	11.3	11.9	12.2	12.8	26.7932	29.8957	28.1305	22.8238	27.8	31.3	27.065	27.0158	71	70
20	92	98	98	80	62	60	62	63	84.9	87	103.4	114	105	96	107	110	283.04	238.6	383.14	366.34	10.0403	6.0325	7.3249	13.784	54.7	49.9	68.4	64.1	7.3	7.1	8.3	8.1	9.6	9.1	10.6	10.3	35.4724	25.2829	19.1181	37.6262	30.9	32.2	34.4389	30.7881	57	69
21	98	100	78	94	62	60	59	60	82.4	91.2	107.4	111	105	103	112	110	584.44	615.03	591.91	722.46	9.84638	11.3535	16.0274	15.4879	108.1	108.6	100.2	122.4	10.5	10.6	10.1	11.1	13.4	13.4	12.8	14.3	16.8474	18.4601	27.0775	21.4377	31.8	29.1	32.9931	34.3621	75	87
22	98	100	78	88	58	56	59	55	76.8	83	85	104	105	96	112	111	702.54	778.53	894.44	962.4	6.87372	11.5271	6.1341	13.0418	153.3	173.1	175.8	187.2	12	13	13	13.4	16.2	17.1	17.1	17.5	9.78417	14.8062	6.85804	13.5513	33.2	34.9	30.9437	28.9884	90	90
23	92	96	90	74	58	60	59	60	88.7	94.3	94	100.6	105	103	107	110	401.81	343.1	490.5	601.86	9.55745	11.0436	7.47756	15.1319	78	67.5	86	100	8.7	8	9.2	10	11.5	10.8	12	12.8	23.7862	32.188	15.2448	25.1419	26.9	32.2	31.6104	29.2029	71	73
24	96	94	94	88	54	56	56	55	70.2	73.1	84.4	87	98	96	104	103	625.03	568	572.09	566.75	3.83276	4.86239	8.3234	8.01591	136.8	122.8	113.5	113.6	11.6	10.9	10.6	10.7	15.2	14.4	13.7	13.7	6.13211	8.56055	14.5491	14.1436	26.6	27.5	33.9253	33.8212	95	97
25	88	100	80	70	65	63	65	63	57.2	58.5	80.4	89.4	105	96	107	110	225.26	274.94	414.91	465.79	3.38051	4.30245	9.79275	9.62457	52.5	61.7	74.5	84.5	7.5	7.8	8.8	9.3	9.3	10.2	11	11.6	15.0069	15.6488	23.6021	20.6629	30.1	31	32.8466	33.9707	66	70
26	96	94	86	78	62	56	59	58	79.37	80.8	93.4	96	105	103	112	106	268.6	194.23	392.11	367.48	10.4423	7.06835	12.7253	12.1082	52.7	45.1	68.3	65.2	7.3	6.8	8.3	8.1	9.3	8.6	10.4	10.3	38.8765	36.3925	32.4535	32.9493	30.6	31	28.4356	31.3063	72	70
27	90	94	94	84	62	60	62	61	74	84.4	100.6	116.6	105	103	112	111	428.71	363.81	379.87	519.92	14.7163	12.9879	14.4949	17.6514	75	65.1	67.3	87.6	8.6	8.1	8.3	9.4	11.2	10.4	10.5	12	34.3273	35.6996	38.1575	33.9503	30.9	30	33.227	31.5322	87	77
28	94	98	82	96	62	60	62	64	81.6	81.2	106.2	109.6	105	103	112	111	363.04	411.64	467.47	435.53	8.68559	9.87434	11.0888	10.1773	69.5	73.6	82.2	74.9	8.1	8.5	9.1	8.9	11	11.2	11.7	11	23.9246	23.9875	23.7208	23.3676	31.6	31.1	30.5305	32.0751	58	44
29	90	94	80	86	62	60	62	60	82.2	91.1	107.8	108.8	105	103	112	110	357.05	348.66	481.12	476.1	12.3903	11.7505	16.7873	13.5272	66.3	67.1	79.2	81.5	8.1	8	8.9	9	10.6	11	11.5	11.7	34.7022	33.7014	34.892	28.4125	29.7	31.3	31.7144	33.0929	79	66
30	96	84	66	80	62	63	62	60	68.6	67.8	80.4	92	105	103	104	102	914.87	835.45	846.67	798.62	3.65297	2.63815	15.2579	9.7115	210.4	196.7	167.6	158.3	14.4	13.9	12.9	12.6	18.9	18.2	16.7	16.2	3.99287	3.15775	18.021	12.1604	32.4	30.5	25.442	28.0088	98	94
31	88	92	88	86	65	63	65	63	87.7	74.8	102	104	105	103	112	110	405.08	413.35	371.09	480.77	9.22074	11.3098	14.0252	14.5337	75.8	75.1	70.4	82.7	8	8.2	7.9	8.8	12	11.8	11.5	12.1	22.7626	27.3615	37.7947	30.2301	29.3	31.7	27.8569	32.3474	71	65
32	94	96	90	98	58	56	59	58	74.9	57.2	84.8	80.6	105	103	112	106	456.86	467.82	527.2	558.98	8.42899	8.84797	13.4582	8.18245	93.6	90.4	96.1	99.1	9.5	9.5	9.9	10.1	12.6	12.3	12.6	12.8	18.45	18.913	25.5277	14.6382	27.2	31.3	30.3958	31.6375	90	91
33	88	94	96	96	62	60	62	60	80.2	92	107.8	103.6	105	103	112	116	398.98	397.25	471.8	587.94	12.3448	14.329	15.4556	15.1002	76	76.1	82	98.6	8.4	8.3	8.9	9.7	11.7	11.7	11.8	13.1	30.9412	36.0705	32.7588	25.6832	28.7	28.6	32.2136	31.3782	82	79
34	98	92	94	92	54	52	56	55	69.8	72.9	83.4	86.2	98	103	107	103	903.58	859.56	938.6	1003.43	8.73821	13.7011	12.7774	16.4476	186.5	167.6	174.9	183.5	13.1	12.5	13	13.2	18.4	17.3	17.4	17.9	9.67062	15.9397	13.6133	16.3914	26.4	23.8	32.6761	36.2154	98	98
35	96	98	94	90	65	60	65	63	81.4	96.8	113.2	122.8	105	103	112	110	349.73	381.27	401.92	404.49	12.4753	13.499	10.3553	11.9071	61	64.6	67.6	68.3	7.9	8.2	8.4	8.4	10	10.3	10.5	10.5	35.6708	35.4056	25.7646	29.4373	29.5	31.9	30.8161	36.0923	53	67
36	91.4894	91.4894	90	88	68	66	69	68	75.8	76.2	92	90	105	103	112	111	406.25	407.95	577.46	590.28	7.13703	11.4352	12.0458	10.7957	93	88	107.2	107.8	9.4	9.2	10.1	10.2	12.7	12.4	13.7	13.5	17.5681	28.0308	20.8599	18.2891	29.5	30.8	27.6607	32.8787	91	76
37	92	98	68	82	62	60	59	60	76.6	76.2	94.8	112.6	105	103	112	110	411.09	449.73	468.74	475.19	8.1831	11.8627	17.6429	13.7898	81.5	82.1	83	84.5	8.9	9	9.2	9.3	11.8	11.7	11.7	11.8	19.906	26.3774	37.6391	29.0195	30.6	34.1	29.3106	33.4004	83	84
38	94.1176	94.1176	78	74	62	60	62	60	66.4	67.8	84.4	87.4	105	103	107	110	1077.28	1001.74	820.29	942.68	7.09727	4.19883	12.4546	8.06027	219	216.8	156.1	185.1	14.5	14.6	12.4	13.6	19.5	19.1	16.1	17.5	6.58813	4.19155	15.1832	8.55038	25.6	31.7	30.3595	28.4513	88	95
39	100	94	76	74	58	56	56	58	82.2	73.5	91.2	96.6	98	96	104	103	252.61	206.25	348.92	370.71	7.96405	7.04069	11.0553	10.9346	54.1	47.2	66.2	72.6	7.4	6.9	8.3	8.4	9.5	9	10.3	10.9	31.5275	34.1367	31.6842	29.4964	30.4	32	29.4708	33.6336	81	80
40	100	100	88	86	62	60	59	60	82.4	86	92.8	104	105	103	107	110	415.83	351.15	476.04	515.99	7.42765	9.64765	13.3434	11.723	82.6	68.8	83.2	90.9	8.8	8.1	8.9	9.5	11.9	10.9	11.8	12.3	17.8623	27.4742	28.03	22.7195	28.1	31.3	33.0847	34.4383	80	75
41	92	78	78	78	58	56	56	55	71.8	71	72.6	81.6	105	96	104	103	763.48	583.07	691.34	750.39	5.09679	5.88853	7.77718	8.99308	165	125.1	133.6	137.1	12.9	11.2	11.6	11.9	16.3	14.2	14.7	14.9	6.67572	10.0991	11.2494	11.9845	32.1	30.3	27.5776	31.2072	92	96
42	98	94	86	78	62	60	62	61	77.4	77.8	101.2	94.2	105	103	112	111	365.74	298.18	490.15	453.69	10.1654	8.45707	19.2777	9.26256	68.3	60.4	82.2	77.8	8.2	7.8	9.1	8.9	10.8	10.1	11.8	11.3	27.7942	28.3621	39.3302	20.4161	28.9	30	34.6213	32.4441	61	63
43	100	84	80	88	58	56	62	57	77.3	68.6	95.4	91	98	96	104	102	391.97	360.35	498.89	442.61	4.22265	3.39339	7.47575	7.9675	84.4	83	94.9	86.8	9	8.8	9.8	9.2	12.1	12.1	12.6	12.2	10.7729	9.41704	14.9848	18.0012	28.1	31.2	30.3347	30.4281	90	97
44	96	98	100	90	62	60	62	64	86	89.2	94.6	109.6	105	103	112	111	307.42	296.71	451.36	421.7	9.88943	9.4476	13.2646	14.1173	60.4	58.8	77.5	74.7	7.8	7.7	8.9	8.8	10.2	9.9	11.3	11.1	32.1693	31.8408	29.3881	33.4772	31.8	30.4	28.729	34.2279	62	60
45	92	96	84	98	62	60	62	61	82.6	73	98	103.6	105	103	112	111	312.17	251	385.6	337.99	8.87658	7.90464	8.01024	8.16776	57.8	49.7	65.8	61.3	7.5	7	8.1	7.9	9.9	9.2	10.4	9.9	28.4349	31.4926	20.7734	24.1657	31.2	33.3	32.5977	30.872	54	62
46	94	84	84	88	58	56	56	57	66	63.2	69	88.8	98	96	104	102	263.33	307.97	400.12	407.82	5.24707	8.74006	7.1319	10.4977	76.3	78.3	89.9	89	8.3	8.6	9.3	9.3	11.8	11.7	12.5	12.4	19.9256	28.3791	17.8244	25.7411	29.7	26.8	20.6343	27.9741	96	91
47	52	54	80	78	58	56	56	58	58.6	63.2	73.4	88.2	105	103	104	111	1200.92	1241.4	1081.69	1076.44	5.7851	10.0282	7.4845	7.27179	272.6	268.8	221	232	16.2	16.3	14.7	14.8	21.6	21.3	19.2	19.9	4.81723	8.07815	6.91927	6.75541	28.8	29.9	30.8567	30.1653	88	91
48	98	96	90	78	68	66	69	68	70.1	81.3	104.4	86.8	105	103	112	111	236.09	210.14	310.29	304.79	3.8325	8.93776	10.5107	10.6215	46.7	41.5	54	53.7	6.9	6.5	7.5	7.5	8.8	8.2	9.3	9.2	16.2333	42.5318	33.8737	34.8487	35.4	32	26.7426	32.2538	46	65
49	94	98	80	90	58	56	56	54	73.8	77.7	92	95.2	105	103	104	102	567.8	484.16	650.7	657.68	11.4964	8.4176	10.9302	12.0151	118.6	104.4	125.6	121.9	10.5	9.9	10.9	10.8	14.4	13.4	14.6	14.3	20.2472	17.3859	16.7977	18.2689	27	31.6	30.8313	30.7293	92	84
50	64.2857	66.6667	80	56	65	60	65	63	22.2	21.4	37.8	53	105	103	107	110	184.34	136.05	246.6	392.55	3.93046	2.7458	7.158	14.1061	40.2	35.7	48.1	68.2	6.6	6.2	7.2	8.3	8	7.7	8.7	10.4	21.3213	20.1828	29.0268	35.9345	38.4	37.7	21.2684	20.5982	65	47
51	94	94	76	62	54	52	59	54	57	53.2	57.6	80.4	98	96	101	102	577.01	486.25	695.64	712.98	7.10324	7.48537	8.53579	13.5345	152.5	137.4	163.8	166.6	12.1	11.5	12.6	12.7	16.3	15.4	16.9	17	12.3104	15.3941	12.2704	18.983	30.4	25.7	23.0341	34.5595	92	100
52	100	96	72	66	68	66	69	67	59.4	64.6	63.8	86.8	105	103	112	110	167.18	159.92	305.11	297.36	1.80565	3.32047	6.65028	4.93727	43.6	42.1	56.5	56	6.8	6.6	7.9	7.8	8.6	8.4	9.4	9.3	10.8004	20.7637	21.7963	16.6037	33	35.9	26.959	25.3068	55	64
53	98	96	78	76	58	56	56	55	72.4	74.5	84.4	85.8	98	103	104	103	477.14	511.35	570	520.74	5.2827	8.47568	7.9441	9.99053	103.4	99.1	113	105.1	10	9.9	10.6	10.2	13.1	12.8	13.6	13.2	11.0715	16.5751	13.937	19.1852	32.1	34.1	31.4582	32.558	93	85
54	98	92	74	80	58	56	56	58	60.4	66	74	89.2	98	96	101	103	172.84	242.98	260.98	382.67	2.46597	5.85223	9.16568	12.2412	44.5	53.2	55.4	74.8	6.7	7.5	7.7	8.7	8.6	9.2	9.3	10.8	14.2677	24.0851	35.1202	31.9891	32.4	33.8	29.9384	33.4721	63	92
55	100	92.3077	90	94	62	60	59	61	67	71.2	93	96.8	105	96	107	106	775.78	772.62	591.15	706.17	8.14394	11.4097	9.408	11.2153	159.4	157.8	116.7	135.2	12.5	12.6	10.9	11.5	16.4	16.1	13.8	15	10.4977	14.7676	15.9147	15.8819	27	30.2	33.2532	30.6187	89	91
56	86	82	84	90	65	63	62	63	75.5	84.6	103.4	102.6	105	103	112	110	314.75	359.63	430.65	479.21	10.6056	12.9247	15.2229	14.8307	66.8	70.3	76.7	81.8	7.9	8	8.7	8.9	11	11.3	11.4	11.7	33.6956	35.9391	35.3486	30.9482	28.4	29.7	34.1611	33.9622	75	79
57	98	98	96	92	65	60	65	67	90.4	86.5	94.4	112.2	105	103	112	116	292.63	391.91	480.6	431.64	7.31821	13.4903	10.92	13.6102	57.6	67.2	78.2	70.6	7.6	8.3	9	8.6	9.8	10.5	11.2	10.6	25.0083	34.4219	22.7216	31.5314	30.9	31.4	31.7841	34.6661	62	52
58	89.5833	91.6667	84	78	65	63	65	67	81.4	89.1	106.4	100.6	105	103	118	110	412.76	417.68	525.82	452.37	8.22052	12.1066	10.5836	12.3938	75.7	75.7	91.8	78.3	8.7	8.8	9.6	9.1	11.3	11.2	12.2	11.2	19.9158	28.9852	20.1277	27.3976	30.8	30.4	34.3696	36.1849	70	82
59	90	94	62	80	54	52	59	50	69.3	64.2	77	91	105	103	107	102	738.95	800.65	830.53	956.3	7.38983	11.1007	13.4206	15.5437	167.9	165.2	170.5	182.8	12.5	12.5	12.5	13	17.1	16.9	17.3	17.8	10.0005	13.8646	16.1591	16.2541	31.8	38	28.7671	23.3757	77	87
60	92	98	82	86	65	63	69	67	68.4	72.8	87.4	100.4	105	103	112	116	341.41	267.89	336.25	469.18	6.75527	5.13005	8.49268	9.08628	62.6	55.5	60.9	77.6	8.2	7.7	8.2	9	10	9.5	9.8	11.1	19.7865	19.15	25.257	19.3663	30.8	33.6	31.1198	29.3225	54	66
61	94	98	92	92	62	60	62	60	84	88	92.8	110.4	105	103	112	110	309.91	266.44	378.33	415.06	8.77027	9.48413	10.3274	11.905	56.1	51.2	66.4	70.6	7.9	7.3	8.3	8.5	9.3	9.1	10.3	10.7	28.2992	35.5953	27.2973	28.6826	28.7	29.8	34.7042	31.4219	63	55
62	100	96	94	92	68	63	65	67	82.4	88.8	110.2	116.4	112	103	118	116	336	387.93	498.25	503.45	9.72325	9.23505	11.7738	12.2309	60	66.7	78.7	78.5	8	8.3	9.1	9.2	9.8	10.3	11.3	11.1	28.9382	23.8061	23.6304	24.2941	29	30.3	33.521	33.7535	47	50
63	98	96	82	80	62	60	62	61	81.7	86.6	102.6	105.2	98	103	112	106	306.7	305.68	442.29	419.21	8.52393	11.5534	13.6751	13.7555	56.7	57	72.9	71	7.8	7.8	8.8	8.7	9.4	9.6	10.7	10.6	27.7926	37.7961	30.9189	32.8129	29.3	31.4	36.0791	33.0816	82	79
64	94	98	94	97.9592	62	60	62	63	79.4	96	116.6	117.8	105	103	112	110	365.22	319.74	436.54	429.5	7.3141	10.4109	12.623	11.8992	65.1	58.7	72.3	71.5	8.2	7.8	8.8	8.7	10.3	9.8	10.7	10.7	20.0265	32.5601	28.916	27.7049	33	29.9	33.8106	31.8774	65	63
65	100	98	72	74	62	60	62	60	64.4	66	82.4	78	105	103	107	105	309.85	244.37	492.77	447.06	5.32225	4.75679	11.2831	5.98081	70.3	60.4	93.1	85.7	8.6	8	9.7	9.6	10.7	9.9	12.3	11.7	17.1768	19.4653	22.8972	13.3781	26.5	28.4	26.0813	30.436	79	85
66	78	90	88	92	68	66	65	67	68.8	78.1	91.2	92.2	112	110	118	116	360.09	401.08	469.32	448.09	8.46365	12.9683	21.1941	12.9702	70	75.1	80.6	77	8.2	8.4	8.9	8.9	11	11.5	11.7	11.2	23.504	32.3338	45.1591	28.9456	30.6	27.2	29.7649	34.7299	68	55
67	96	96	78	84	62	60	62	61	83.6	79	102.4	87	105	103	112	111	315.48	330.47	384.22	443.5	7.13901	11.7232	15.7959	12.3081	64.4	64.5	70.5	78.4	7.8	7.9	8.3	8.8	10.7	10.5	11	11.5	22.629	35.4746	41.1116	27.7522	31	34.3	29.9969	29.3573	73	68
68	82.2222	88.8889	86	78	65	56	62	60	62.8	69.4	81.8	108.4	105	103	112	116	499.31	306.64	503.06	537.12	3.10142	4.64481	8.93163	8.50154	96.2	69.8	92.8	96.5	9.6	8.3	9.7	9.8	13	10.9	12.4	12.7	6.21143	15.1476	17.7546	15.828	30.8	33.7	28.104	32.1859	79	87
69	88	90	88	84	62	60	62	61	80.2	81.4	102	110.4	105	103	112	111	422.66	372.84	496.15	508.56	11.1162	9.58206	16.005	13.0707	76.8	71.3	85.1	83.3	8.6	8.3	9.3	9.2	11.5	11	11.7	11.7	26.3007	25.7	32.2584	25.7014	31.4	31	30.6215	33.3883	68	65
70	83.3333	64.5833	88	80	68	66	69	68	75.8	79.7	100	109	105	110	118	117	414.66	377.97	431.55	442.11	2.51531	14.2423	4.85705	14.7625	72.5	66.4	71	70.6	8.7	8.3	8.7	8.7	10.8	10.4	10.5	10.5	6.06598	37.681	11.2549	33.391	32.4	28.9	27.8875	34.1386	78	69
71	98	90	64	64	58	56	56	54	75.8	63.4	79.6	87	98	96	104	102	327.16	309.57	539.01	528.92	2.81434	3.18117	8.18219	9.58031	81.9	77.9	102.6	105	9.1	9	10.2	10.3	11.5	11.2	13	12.9	8.60223	10.2762	15.18	18.113	29.8	33.2	28.3153	24.8394	85	91
72	96	96	86	86	62	60	59	60	85	84.2	111.6	110	105	103	112	110	444.15	452.34	598.27	710.55	8.83172	13.1794	12.694	14.6788	81	84.5	99.1	119	8.8	9	9.9	11	11.9	12.1	12.9	13.7	19.8846	29.1364	21.2178	20.6584	32.3	31.5	29.3479	30.0441	70	75
73	96	98	86	86	58	60	59	58	72.4	76.8	111.2	103.8	98	103	112	111	239.95	304.55	383.33	311.97	6.59526	10.5452	10.7737	10.5737	52.7	60	70.1	60.7	7.2	7.7	8.3	7.8	9.5	10.1	10.9	10.1	27.4854	34.6249	28.1056	33.8934	32.1	35.5	29.1793	29.991	77	57
74	96	96	82	82	58	56	56	54	73	76.5	89.8	92	98	96	104	102	600.76	730.48	755.07	747.79	4.72109	5.27797	12.2349	11.0966	142.9	168.4	151.3	151.5	11.7	12.8	12.3	12.1	15.5	16.9	15.8	15.9	7.85851	7.2253	16.2036	14.8392	27.5	30.6	27.9874	27.829	95	92
75	92	96	100	94	65	63	65	61	75	79.3	107.2	96.2	105	103	118	117	357.15	384.97	425.92	460.64	8.0594	9.02339	8.113	11.31	63	65.3	70.9	75.4	8.4	8.5	8.9	9.1	10	10.1	10.3	10.8	22.5658	23.4391	19.0482	24.5528	27.2	29.9	27.8818	33.5535	50	56
76	98	100	72	80	58	56	56	55	71.5	73.5	83.4	90	98	103	104	103	738.87	910.98	694.05	865.43	7.02005	8.90525	9.10806	13.9833	153.4	182.1	141.7	167.4	12.1	13.3	11.7	12.7	16.3	17.8	15.6	16.9	9.50109	9.77542	13.1231	16.1576	26	31.2	30.5332	29.3206	95	98
77	94	98	86	88	62	60	62	61	79	85.2	92.4	82.8	105	103	112	111	535.89	532.98	684.43	625.74	9.52644	14.7737	9.80744	10.7923	118.1	110	130.6	121.7	10.4	10.1	11.2	10.7	14.6	13.9	15	14.5	17.7769	27.7191	14.3294	17.2472	28.8	28.8	30.2192	32.689	82	88
78	93.0233	95.3488	80	76	54	52	52	51	72.8	84.4	99.4	103.2	98	96	104	103	521.5	486.71	580	582.99	9.40831	9.61006	11.3565	16.0589	109.3	102.2	109.1	112.1	10.2	9.8	10.3	10.5	13.7	13.3	13.6	13.7	18.0409	19.745	19.5802	27.5458	28.8	31.2	29.0978	31.1384	96	97
79	92	76	82	82	65	63	69	68	90.4	100.6	116.2	106.8	105	110	118	111	407.25	417.61	484.22	505	9.07375	15.773	11.1651	11.5802	70.2	70.9	79.1	82.2	8.4	8.6	9.2	9.3	10.7	10.7	11.1	11.5	22.2807	37.7692	23.058	22.9312	29.6	32.1	30.7127	33.2688	62	53
80	94	84	78	88	62	60	62	63	85	89	105.6	109.8	105	103	112	116	355.91	423.5	416.33	457.88	6.86005	13.6424	18.9374	12.3	65.2	72.5	71.9	76.2	7.9	8.4	8.4	8.6	10.6	11.2	11.2	11.4	19.2747	32.2139	45.4866	26.8629	32.9	33.3	34.3002	33.1486	74	60
81	92	94	70	68	58	56	59	55	87.4	87	83.4	88.4	105	103	112	111	1123.46	1013.19	1128.86	1297.91	12.8329	11.2175	16.0383	16.7771	234.1	213.3	216.4	238	15.1	14.6	14.4	15.1	19.9	18.8	19.2	20	11.4227	11.0715	14.2075	12.9262	29.4	32.2	30.002	27.0532	90	93
82	96	100	94	94	68	68	69	68	79.8	98.4	113.4	110.2	112	103	118	117	343.55	300.96	442.78	422.45	8.12547	7.71125	14.4294	11.8957	60.3	54.4	70.8	68.8	7.8	7.4	8.7	8.5	9.9	9.5	10.5	10.4	23.6515	25.6221	32.5881	28.1589	28.9	28.8	35.6241	34.9374	52	60
83	92	92	86	82	58	56	56	54	84.6	88.8	85.4	100.4	105	103	112	110	883.04	831.31	927.11	1051.06	9.8681	11.0211	0.97814	7.96122	184	176.4	173.3	190.2	13.8	13.6	13.3	14	17.4	16.9	16.5	17.5	11.1752	13.2576	1.05504	7.57447	28.9	31.7	28.1758	27.9778	85	86
84	93.1818	93.1818	76	64	58	56	56	55	68.1	77.6	89.2	94.6	105	96	104	106	921.5	858.72	713.01	859.9	4.68079	10.1137	12.8879	17.0966	205.5	187.7	146.5	169	14.1	13.5	12	12.9	18.9	17.8	15.6	16.8	5.07956	11.7777	18.0753	19.882	30.6	31.4	29.3404	27.3548	92	89
85	86	86	96	88	54	52	56	55	80.4	85.2	92.2	105	105	103	112	117	954.48	1035.6	1244.03	1239.11	7.29076	17.1901	8.10125	13.1943	209.4	221.5	232.8	237.5	15	15.3	15.3	15.5	18.2	18.9	19.5	19.9	7.63844	16.5992	6.5121	10.6482	34.8	32.1	24.842	27.7629	90	89
86	82	86	88	88	58	56	56	54	67.8	71.3	83.4	83.2	105	103	104	102	427.38	424.86	473	591.42	8.65665	12.284	4.41636	6.73386	86.2	87.9	95.4	107.2	8.9	9	9.4	10.1	12.3	12.4	12.6	13.5	20.2551	28.9129	9.33692	11.3859	29	28.8	32.839	30.7537	85	79
87	94	90	78	90	62	63	62	61	64.8	73.6	85.2	92.4	105	103	104	106	562.06	718.31	578.35	687.2	2.06431	5.29517	10.6385	9.54044	112.7	133.4	102.8	122.7	10.3	11.3	10.3	11	14.1	15.3	12.9	14.2	3.67278	7.37168	18.3945	13.8831	27.6	31	32.2227	32.7641	84	93
88	95.6522	86.9565	76	90	62	60	62	64	77.6	65.2	88.2	90.2	105	103	107	103	745.22	650.59	653.33	619.16	4.77915	5.24806	9.56395	3.70222	162.5	142.3	125.1	118.8	12.4	11.7	11	10.9	17	15.7	14.5	14.1	6.41306	8.06664	14.6388	5.97943	25.5	31.4	33.7365	29.2669	96	97
89	96	92	84	94	62	60	62	60	69.6	73.3	95.6	105.2	105	103	112	110	298.69	285.67	442.48	409.16	5.70068	10.4159	12.7698	10.3102	59.4	56.4	76.9	71	7.8	7.5	8.9	8.6	9.9	9.7	11.1	10.6	19.0856	36.4615	28.8595	25.1985	31.4	35.1	26.106	29.3453	62	56
90	90	94	84	80	62	60	62	61	65.9	80.4	95.4	94	105	103	112	106	569.28	486.02	566.31	523.42	5.28272	11.1903	12.029	10.72	103.9	93.5	99.8	97.2	10.2	9.4	10	9.7	13.2	12.8	12.9	12.8	9.27964	23.0241	21.2411	20.4807	29.1	33.2	33.8584	33.5666	76	67
91	93.1818	95.4545	76	86	58	56	56	54	78.5	76.8	105.8	97	105	103	107	105	915.98	876.64	1069.31	1091.21	13.2745	12.4751	12.3463	11.456	175.7	167.6	181	194.9	12.6	12.3	13.3	13.7	17.9	17.6	17.6	18.3	14.4921	14.2305	11.5461	10.4985	26.9	28.4	29.7643	33.262	89	96
92	94	92	92	90	62	60	62	64	80	81	92.2	104.4	105	103	118	117	431.1	457.45	397.96	455.1	14.5237	13.7492	10.7183	15.2471	74.9	77.5	71.7	79.1	8.8	9	8.7	9	11.1	11.2	10.7	11.3	33.6899	30.0561	26.933	33.5028	29.8	32.3	30.2576	35.0595	87	83
93	100	98	72	92	54	52	56	55	67.2	72	73	85.4	98	103	112	106	697.04	759.39	800.83	725.58	8.74785	13.1945	12.1433	11.7713	153.8	156.1	159.9	139.5	11.9	12	12.1	11.4	16.6	16.9	16.6	15.6	12.55	17.3752	15.1634	16.2233	27	29.5	28.8041	32.9919	97	97
94	88	84	72	72	58	56	56	57	53.7	56.4	71.6	70.2	98	96	104	102	353.25	334.21	485.93	526.69	3.40574	6.29577	9.23611	9.515	76.6	75.4	100.8	99.6	8.6	8.7	9.9	10	11.6	11.3	12.9	12.9	9.64107	18.838	19.0071	18.0657	29.4	31.1	32.9449	29.2977	100	99
95	96	96	94	92	58	56	59	58	69.8	81.4	93	92.4	105	103	112	111	677.25	827.84	713.44	786.31	9.28526	14.0784	14.3368	13.6504	134.9	151	131.4	138.5	11.5	12.1	11.3	11.5	14.9	15.8	14.8	15.2	13.7102	17.0062	20.0953	17.3601	29.2	33.7	29.6175	28.9539	80	89
96	100	91.3043	82	92	58	56	56	55	93.8	85.3	99.8	92.8	105	103	104	111	443.37	542.88	610.93	718.42	8.6894	11.6496	5.80073	13.6648	90.2	98.5	105.5	121.2	9.3	9.9	10.2	10.9	12.4	12.8	13.2	14.1	19.5983	21.4588	9.49492	19.0206	30.1	31.4	27.4586	31.3729	82	80
97	90	94	94	92	62	60	65	64	65.6	69.8	82.8	90.8	105	103	107	111	586.98	538.52	557.28	573.41	8.78006	11.1184	9.68	13.0839	115.5	106.6	106.5	105.5	10.7	10.1	10.4	10.2	13.9	13.6	13.3	13.3	14.9581	20.6461	17.3701	22.8177	30.9	29.7	25.5334	31.1886	86	85
98	100	89.6552	90	92	65	60	59	57	74.6	68	81	90.6	105	103	107	102	957.74	1019.82	965.5	998.82	9.85629	9.72087	10.6982	9.98109	222.1	235.9	190.2	199.7	14.4	14.9	13.6	13.8	19.9	20.5	18.1	18.5	10.2912	9.53196	11.0805	9.99288	27.6	30.2	25.6314	27.347	96	95
99	88	90	78	86	58	56	59	55	54.2	68.2	73.6	84.4	105	96	104	103	401.11	366.67	442.01	493.31	4.61369	7.73583	7.06205	8.90884	91	82.7	94	101.5	9.3	8.9	9.6	9.9	12.5	11.9	12.6	13.1	11.5023	21.0977	15.9771	18.0593	30.3	33.7	26.1994	29.6707	96	97
100	100	92	72	88	65	63	65	63	67.8	67.6	94	101	105	103	112	110	308.88	293.09	400.97	466.6	2.58805	6.24745	12.4061	10.4218	67.2	61.9	74.2	80.8	8.2	8.1	8.8	9.3	10.7	10.2	11.1	11.5	8.37885	21.3161	30.9402	22.3357	30.5	31	26.132	30.1851	49	49
101	90	100	86	69.3878	58	52	56	54	60.8	64.3	72.6	91.6	98	96	104	99	454.77	490.9	614.93	557.88	3.5245	4.38825	7.8986	9.08258	105.3	106.1	120.8	112.5	10.3	10.4	11	10.7	13.1	13.2	14.1	13.6	7.75005	8.93923	12.8447	16.2805	23.8	26.3	31.0522	32.3802	100	97
102	92	98	66	66	58	56	56	60	69.2	65.2	91.8	86.8	98	96	104	102	416.21	446.88	401.79	530.9	4.74071	4.82168	13.1861	9.40848	84.2	96.1	77.5	95	9.3	10	8.9	9.9	11.8	12.6	11.3	12.4	11.3901	10.7898	32.8183	17.7218	26.6	29.8	30.6342	32.5343	82	87
103	96	92	48	56	58	56	56	54	64.2	59.6	65.4	79	98	96	104	99	124.66	115.26	179.55	201.34	2.21214	2.9131	3.115	7.78536	37.8	34.9	45.2	48.5	6.1	5.9	6.7	7	8	7.7	8.7	9	17.7457	25.2742	17.3489	38.6677	35.4	35	23.8289	25.781	71	77
104	90	88	78	92	54	56	56	54	75.4	85.4	95	91.6	105	103	112	110	855.09	668.2	832.5	1032.19	6.08517	8.64119	14.7067	16.7113	179.1	152.8	164.1	186.1	13	11.7	12.3	13	17.8	16.8	17	18.3	7.11641	12.932	17.6657	16.1901	31.2	32.7	29.0306	27.9803	94	94
105	82	92	72	68	68	66	69	67	64.5	67.4	90.4	95.6	105	103	107	110	391.39	350	526.08	501.2	4.36982	4.58332	10.6069	13.2718	90.4	85.9	98.6	92.3	9.5	9.1	9.9	9.5	12.4	12.2	13	12.5	11.1649	13.0952	20.1622	26.48	31.1	32.6	28.4743	28.8526	79	87
106	84	84	74	80	68	63	65	67	56.4	77.4	89.4	86	105	103	104	110	355.81	245.9	399.34	355.93	4.01435	4.66435	9.69378	7.349	69.4	54.1	69.9	65.4	8.5	7.5	8.7	8.4	10.7	9.5	10.5	10.2	11.2822	18.9686	24.2745	20.6473	29.8	31.2	25.8511	28.51	66	66
107	100	92	80	88	65	63	65	63	83	93.4	109.6	122.4	112	103	118	116	445.13	366.9	449.54	462.87	9.66865	12.8333	15.3882	11.5489	70.3	61.7	71.2	71.4	8.5	8	8.7	8.8	10.7	10.1	10.6	10.7	21.721	34.9772	34.2311	24.9506	31.8	28.5	38.9576	36.5049	57	46
108	96	98	84	88	65	63	65	63	82.7	92.6	105.6	114	105	103	112	110	367.63	290.51	423.38	450.34	8.51464	8.37679	12.2412	9.47682	66.4	55.6	73.4	77.2	8.2	7.5	8.6	8.8	10.6	9.7	11	11.3	23.1608	28.8351	28.913	21.0437	32	31.1	34.7125	31.2291	67	71
109	95.3488	93.0233	82	86	68	68	72	70	67.8	74.8	93.6	92.8	105	110	118	116	830.45	865.97	892.38	965.74	3.37348	5.77281	7.31366	8.93814	185.4	184.1	164.4	172.1	13	13.1	12.6	12.7	18.1	18	16.6	17.2	4.06222	6.66632	8.19568	9.25522	31.6	30	25.2484	27.8936	89	77
110	98	92	78	88	58	56	56	58	68.4	80.6	96.4	95.2	98	96	112	103	678.63	585.57	947.57	671.85	4.34148	5.94114	15.0133	9.79136	155.5	132.6	163.1	129.1	12.5	11.4	12.7	11.2	15.9	15	16.6	14.6	6.39746	10.1459	15.844	14.5737	30.1	30.9	29.0406	28.3912	94	94
111	98	92	82	94	62	60	59	61	63.4	60.4	76	83.4	105	103	107	106	686.41	657.91	583.6	578.89	4.66903	6.66418	13.9522	10.22	139.9	139.1	110.5	111.7	11.8	11.6	10.6	10.7	15.4	15.5	13.6	13.5	6.80208	10.1293	23.9071	17.6545	28.9	29.6	32.0959	28.0688	90	92
112	92	98	92	94	62	60	62	63	75.4	72.2	97.8	110	105	103	112	116	370.63	418.98	542.09	505.39	13.6003	10.2639	16.1848	12.5966	72.1	75.2	88.3	83.4	8.1	8.4	9.3	9	11.5	11.5	12.2	11.9	36.6946	24.4974	29.8563	24.9245	28.3	33.9	28.8664	30.321	68	72
113	96	98	80	64	62	60	62	61	54.8	59.6	75.4	64.6	98	96	97	103	254.98	265.81	240.62	291.45	3.24964	4.55454	7.27875	5.755	64.5	66	59.4	68.4	7.8	7.9	7.5	8.1	10.7	10.8	10.1	10.8	12.7448	17.1347	30.25	19.7461	31	34.9	29.5923	31.2099	98	98
114	81.25	89.5833	90	90	54	52	56	55	65.7	66.6	80	80.4	105	103	112	111	1119.47	971.27	1277.25	1199.44	11.2837	12.8094	12.7424	13.2956	235.5	225.6	249.1	238.4	14.3	13.9	15.1	14.7	20.9	20.7	21.3	20.8	10.0795	13.1882	9.97647	11.0848	29.8	30.4	26.993	32.028	89	87
115	97.619	92.8571	76	90	65	63	65	68	65.1	68	82.2	96.6	105	103	118	111	297.26	328.48	411	421.14	6.83933	8.0234	11.1539	10.0736	59.7	64.8	70.5	76.3	7.4	7.7	8.3	8.5	10.4	10.8	11	11.4	23.0078	24.4255	27.1386	23.9197	30	34	36.202	39.4743	66	80
116	100	92.6829	92	90	62	60	59	58	78.2	82.1	83.2	78.4	105	103	107	103	776.29	739.94	758.28	857.21	6.88104	13.6719	9.59435	11.032	173.5	157.4	162.1	170.5	12.8	12.1	12.4	12.8	17.4	16.6	16.7	16.9	8.86397	18.4771	12.6528	12.8697	26.7	30.4	32.0635	27.2613	89	79
117	100	94.2857	84	90	58	56	59	55	75.9	84.4	80	89.2	105	103	107	106	878.92	904.19	884.02	974.96	12.2606	14.5916	15.0907	14.91	191.9	200.4	172.9	187.1	13.6	13.9	13.1	13.2	18.2	18.7	17.2	18.1	13.9497	16.1377	17.0706	15.2929	28.8	30	32.5067	29.84	96	88
118	100	96	96	62	62	60	65	67	64.9	64.3	93.8	82.6	105	103	104	110	469.69	591.6	503.73	514.96	5.42645	8.73797	6.78	8.93	94.1	105.2	93.7	95.7	9.4	10.2	9.7	9.6	12.9	13.5	12.5	12.9	11.5532	14.7701	13.4596	17.3412	31.6	32.8	34.8563	30.3091	80	91
119	88	80	84	86	62	60	56	57	70.9	77.1	96.8	95.8	98	96	104	102	207.42	239.56	347.78	359.33	5.00142	9.17756	8.62476	9.74744	51.5	51.3	68.8	68.6	7.2	7.2	8.3	8.3	9.4	9.3	10.6	10.6	24.1129	38.31	24.7995	27.1267	31.9	33.3	31.8792	30.0594	80	82
120	100	100	96	90	62	56	62	60	95.6	82.6	109.8	106.4	105	103	112	116	486.15	537.38	502.28	546.72	9.60745	11.3001	11.6196	14.3436	90	91.4	90	94.8	9.2	9.4	9.3	9.6	12.6	12.6	12.4	12.6	19.7622	21.0281	23.1337	26.2357	30.3	32.6	34.5565	33.4896	80	76
121	90	94	74	80	62	60	59	57	66.5	73.9	85.4	93.8	105	103	104	105	437.13	447.18	551.19	630	6.6825	9.84005	10.6846	10.5862	98	101	104.6	117.8	9.7	9.8	10.1	10.8	12.9	13.2	13.3	14.1	15.2873	22.0047	19.3846	16.8036	27.3	27.8	33.9686	32.8563	90	80
122	90	72	78	88	58	56	56	54	69.8	72.6	91.8	86.4	98	96	104	102	393.84	318.66	404.49	434.11	6.62517	8.08979	12.2379	8.06091	72.7	61.6	72.5	78.3	8.6	8	8.7	9.1	10.9	10	10.8	11.1	16.8221	25.3866	30.2553	18.5688	26.1	31	39.1558	33.9798	86	82
123	92	96	46	38	62	60	62	61	60.2	65.2	64	73.4	105	103	104	103	161.69	203.07	297	297.38	1.73005	4.12276	7.09043	13.8953	44.7	48.3	56.5	58.2	6.9	7.2	8	8	8.6	8.8	9.4	9.5	10.7	20.3025	23.8735	46.7256	30.4	33.2	29.5167	27.9766	78	82
124	98	98	82	88	62	60	62	60	80.6	78.4	92.4	103.4	105	103	112	110	403.13	375.56	539.68	522.15	9.78638	10.777	9.92098	17.52	79.5	73.5	97.5	87.3	8.6	8.3	9.7	9.2	11.9	11.4	12.8	12.2	24.2757	28.6961	18.3831	33.5536	29.3	31.2	31.4345	30.7332	80	72
125	88	80	88	78	54	52	59	55	78.8	78.7	85.6	89.2	105	103	118	111	1216.57	798.5	1364.02	1268.76	14.1432	14.0756	13.998	11.4021	256.6	193.1	259.6	243.2	15.4	13.4	15.7	15.4	21.3	18.3	21.3	20.4	11.6255	17.6275	10.2623	8.98677	28.5	29.7	28.1375	27.1216	96	91
126	92	88	92	86	54	56	56	54	78.2	69.6	91	94.6	98	96	104	102	291.09	386.07	512.01	470.53	5.06875	8.49688	9.28239	8.2493	64.6	74.5	92.5	84.8	8.2	8.7	9.7	9.4	10.5	11.1	12.3	11.8	17.4129	22.0085	18.1293	17.5319	26.8	29.9	36.654	31.1167	89	93
127	98	88	80	90	65	66	69	68	83.2	86.4	105.6	99	105	103	118	117	266.21	287.62	394.92	350.75	9.45107	10.5505	13.3067	9.95533	50.3	54.2	69.6	60.2	7	7.2	8.3	7.7	9.3	9.6	10.7	10	35.5022	36.6825	33.6948	28.383	29.6	32.9	33.013	31.8326	53	41
128	90	92	88	74	62	60	62	60	69	63.6	84.8	97.6	98	103	112	102	240.2	303.09	340.27	374.82	6.24072	9.25158	12.3123	8.81189	56.7	62.8	65.2	69.6	7.4	7.9	8.2	8.5	9.8	10.3	10.2	10.6	25.9812	30.5237	36.1838	23.5097	31.9	33.8	32.6138	27.4933	83	74
129	54	72	90	90	54	56	52	54	58.6	58.9	73.8	86.8	105	103	112	110	625.14	693.12	898.79	834.07	10.7838	10.2587	5.06711	9.71244	153.1	161.4	178.6	164	11.7	12.1	13.4	12.7	16.7	17.1	17.3	16.7	17.2502	14.8008	5.6377	11.6446	32.4	32.9	28.631	29.0934	89	88
130	80.4348	95.6522	90	72	65	63	65	64	62.2	67.6	90.6	93.6	105	103	112	111	517.49	492.25	429.69	529.75	5.00088	5.68801	9.85844	12.1839	99.2	93.7	80.2	96.7	9.7	9.6	8.9	9.8	13.1	12.6	11.6	12.8	9.66379	11.5552	22.9432	22.9993	28.8	33.2	28.8342	30.3155	81	76
131	96	96	86	90	58	56	56	54	62.9	69.5	90	84.4	105	96	107	102	735.04	645.95	697.68	909	11.8409	10.1671	9.63814	13.4104	160.9	145.8	144.1	172.4	12.3	11.8	11.7	12.9	17	16	15.8	17.2	16.1092	15.7399	13.8146	14.753	28.5	28.6	34.7533	29.1015	93	95
132	100	94	86	80	62	60	59	57	76.4	77.9	96.4	111.2	105	103	112	110	520.23	620.06	635.3	600	7.19925	9.00899	10.4421	11.821	96.1	105.1	106	104.4	9.8	10.3	10.4	10.2	12.8	13.3	13.2	13.2	13.8385	14.5293	16.4365	19.7017	28.6	32.9	32.003	32.7836	52	52
133	86	94	84	92	58	56	59	54	60.6	63.6	72.6	90.2	105	103	107	110	622.17	765.12	650.85	800.79	7.00262	10.599	7.54119	13.9926	139	156.6	133.1	154.4	11.7	12.4	11.5	12.1	15.4	16.2	15	16.3	11.2551	13.8528	11.5867	17.4735	28.9	29.8	36.226	30.5705	88	93
134	91.4894	93.617	94	84	54	52	52	51	69.4	77.6	88.6	106.2	105	103	104	111	821.75	784.48	991.2	1113.36	8.01099	12.2105	10.4955	15.1543	170.7	168.6	190.8	202.2	12.7	12.6	13.5	14	17.2	17.1	17.9	18.6	9.74874	15.565	10.5887	13.6113	30.4	35.6	31.3193	27.8546	94	87
135	90	94	62	76	54	56	52	55	40.6	49	56	62.8	105	103	107	111	892.11	769.63	1078.29	1148.31	7.7105	6.39941	7.37323	14.2563	200.7	187.2	209	224	14.6	13.8	14.8	15.1	18.3	17.7	18.8	19.4	8.64296	8.31496	6.83789	12.415	30.6	31.5	28.1626	23.5222	99	96
136	92	96	84	84	62	60	59	58	68.2	69.4	80.4	104	105	103	107	106	227.18	318.12	388.56	373.43	7.31266	10.2055	2.76333	13.2248	47.8	57.7	74.3	67.1	7	7.9	8.5	8.2	8.8	9.6	10.9	10.4	32.1885	32.0809	7.11173	35.4143	30.2	30.5	30.6579	33.1852	77	79
137	88	90	80	78	65	60	62	64	77.4	77.2	100.4	99.2	105	103	112	111	491.99	485.76	551.2	416.41	8.55847	9.34672	17.338	6.80436	84.5	84.5	90.7	75.8	9	9	9.4	8.7	12	12	12.4	11.1	17.3956	19.2415	31.455	16.3405	27.3	29.7	37.2559	34.0756	91	94
138	94	90	78	86	65	60	65	67	82.4	90.9	111.4	115.6	105	103	112	110	378.93	404.23	388.9	422.83	9.14261	11.1298	10.0079	14.364	66.8	67.8	67.3	72.5	8	8.1	8.2	8.4	10.8	10.8	10.6	11.1	24.1272	27.5332	25.734	33.971	31.8	32.7	34.8403	31.3046	64	61
139	84	96	98	94	58	56	59	57	69	74.6	86.6	103.2	105	103	112	116	536.67	807.94	932.64	951.39	5.80815	12.0332	9.29735	15.7334	143.5	185.2	199.1	193.5	11.5	13.3	13.8	13.8	16	18.1	18.4	18	10.8226	14.8937	9.96885	16.5373	28.8	27.6	28.4121	31.9407	84	87
140	94.8718	92.3077	74	68	54	56	56	55	70	61.1	78.6	79.2	98	96	104	103	450.14	496.16	566.23	630.16	2.91709	1.95729	9.22838	10.2997	106.4	113.4	110.8	120.5	10.2	10.9	10.5	10.9	13.4	13.6	13.5	14.1	6.48046	3.94488	16.2979	16.3446	30.3	29	32.3047	30.6597	98	97
141	92	92	86	90	58	60	59	61	72.8	71.7	86.2	90.2	98	96	104	103	539.7	684.79	578.91	543.89	7.0381	6.41179	6.53767	8.02044	121.1	140.6	116.1	110.1	10.9	12	10.9	10.5	14.3	15.2	13.7	13.6	13.0408	9.36313	11.2931	14.7464	29.4	30.8	32.793	29.147	97	97
142	96	100	64	78	54	56	59	54	72	75.4	68.6	88.4	98	103	107	102	776.1	777.64	770.16	726.52	5.21776	6.12305	9.38219	8.36487	145.1	147.1	137.9	129.8	12.3	12.2	11.8	11.4	15.3	15.5	15	14.5	6.72306	7.8739	12.1821	11.5136	29.3	33.7	27.5424	28.8978	99	95
143	98	96	86	70	58	56	56	55	61.2	66.1	78.6	72.4	98	96	104	100	393.33	430.96	524.14	410.63	3.47434	4.3913	7.48093	7.29714	82.2	89.3	100.6	80.4	9.1	9.6	10.2	9.1	11.7	12.1	12.6	11.4	8.83306	10.1897	14.2728	17.7706	27.2	31.5	35.4545	31.2436	92	99
144	95.6522	95.6522	90	84	62	60	62	63	72.4	82.6	96.4	103	105	103	112	110	347.07	312.79	440.67	386.38	7.11097	8.23188	11.2629	5.09524	72	66.2	80.2	72.2	8.2	7.7	8.8	8.5	11.4	11	11.8	11	20.4888	26.3174	25.5586	13.1871	30	30.6	31.2017	32.9721	68	79
145	100	94	92	96	58	60	59	55	100.6	96.8	105.4	113.4	105	103	118	111	881.81	855.1	1014.26	938.74	10.0274	13.9949	13.9726	14.6121	161.5	161.7	169.5	163.7	12.7	12.7	13	12.8	16.4	16.4	16.9	16.5	11.3714	16.3665	13.7762	15.5656	30.1	29.9	31.4183	30.657	71	66
146	98	94	82	72	62	60	62	60	86	100.2	78.2	92.6	105	103	112	110	336.88	330.12	464.36	545.16	8.33352	15.0524	13.6927	15.6022	69.1	69.5	81.5	91.2	7.9	8	8.9	9.5	11.3	11.3	11.8	12.4	24.7373	45.5974	29.4872	28.6195	29.9	29.6	29.8255	28.4139	64	66
147	96	90	76	72	58	52	52	55	74.4	70.8	87.8	87	98	96	104	103	365.23	356.23	434.42	483.18	5.01255	4.9025	11.7947	13.7797	80.4	80.8	85.4	92.4	8.9	8.8	9.3	9.5	11.6	11.9	11.9	12.6	13.7242	13.762	27.1505	28.5188	29.2	30	32.9411	33.016	98	95
148	100	93.75	74	78	58	56	59	57	68.6	69.4	80.6	87.6	98	96	107	102	647.52	653.82	750.21	793.11	2.94318	6.41006	10.0657	8.02667	124.3	126.1	132.4	143.9	11.1	11.1	11.5	11.9	14.4	14.5	14.8	15.6	4.54532	9.80398	13.4171	10.1205	24.6	28.9	36.4911	30.6028	98	99
149	88	74	86	90	62	60	62	64	70.4	84.2	99.6	107	105	103	118	111	385.06	346.5	501.66	522.12	6.55074	15.3201	13.0321	19.1693	74.5	68.6	85.1	88.2	8.3	7.9	9.1	9.1	11.6	11.2	12	12.4	17.0122	44.2138	25.9779	36.7144	29.8	30.1	31.4027	29.3846	77	59
150	92	92	86	86	62	56	59	60	75.5	83.5	93.8	108.4	105	103	112	110	492.24	591.69	663.62	646.01	7.03701	11.0122	12.8428	11.0858	112.9	124.2	131.3	122.4	10.4	10.9	11.3	11	13.8	14.6	14.8	14.3	14.2959	18.6114	19.3526	17.1604	25.3	26.6	34.3774	34.5351	95	84
151	74	72	80	80	68	63	69	68	73.7	72.7	81.6	88.4	105	103	112	111	419.86	449.83	421.49	406.88	4.3325	10.1342	7.57025	10.4325	76.2	81.2	72.9	72.9	8.7	9	8.7	8.5	11.2	11.6	10.9	10.9	10.319	22.5288	17.9607	25.6402	31	31.9	32.2467	32.147	62	68
152	98	94	92	88	62	60	62	60	88.4	83.4	98.8	105.4	105	103	112	110	420.28	379.23	432.67	587.27	10.6641	14.2469	17.2911	12.1645	79	72	77.3	97	8.5	8.4	8.5	9.8	11.9	11.2	11.4	12.7	25.3739	37.5675	39.9637	20.7137	34.3	32.3	28.3674	31.5742	70	68
153	100	88	94	88	65	63	65	68	102.2	93.8	113	115	105	103	118	117	342.34	354.33	439.49	454.63	11.3589	18.1046	14.4613	15.7766	63.1	63.2	71.9	75.1	8.1	8.2	8.9	9	10.2	10	10.6	10.9	33.18	51.096	32.9047	34.702	26.9	29.5	33.3407	31.7459	52	67
154	60.7143	60.7143	74	70	58	52	56	54	35.9	39.1	61.2	60.8	105	103	107	110	835.98	1021.87	1254.01	1282.52	11.1043	15.8001	10.5014	14.0463	201.5	215	230.8	228.9	13.8	14.6	15	15.1	18.9	19.2	19.9	19.7	13.2829	15.462	8.37422	10.9521	32.6	32.5	21.4867	25.4895	96	90
155	96	92	92	90	62	60	62	60	90	93	108.8	113	105	103	112	110	560.28	453.2	684.93	745.19	9.11089	8.67049	14.6793	12.5271	113.3	99.6	120.3	129	10.4	9.8	10.8	11.1	14	13.1	14.4	14.8	16.2612	19.1317	21.4319	16.8106	29.9	31.5	32.861	27.807	78	78
156	28	20	60	72	58	56	59	55	59.9	61.7	74.2	84	105	103	112	117	778.24	1083.28	965.1	1281.79	15.678	31.7272	12.2657	8.36833	183.3	218.2	190.5	226.8	13.9	15.4	13.9	15.4	17	18.4	17.7	19.2	20.1456	29.2882	12.7092	6.52863	31	35.1	27.2857	24.9015	90	89
157	80	100	86	94	62	60	59	60	72.6	74.7	102.2	99.8	105	103	112	110	302.55	373.88	372.81	368.95	6.76281	9.71885	10.0781	7.42915	67.2	71.3	72.6	70.3	8.1	8.4	8.7	8.4	10.7	11	10.8	10.7	22.3528	25.9945	27.0329	20.1359	30.3	29.8	32.1056	31.9867	75	68
158	82	96	86	92	58	60	56	57	66.4	74	96.6	95.6	105	103	104	105	453.35	360.57	511.28	512.48	9.69152	9.64859	10.7823	9.67783	86.5	73.9	90.1	92	9.3	8.5	9.5	9.7	12	11.3	12.2	12.2	21.3777	26.7591	21.0889	18.8843	29	32.9	32.496	29.3912	90	87
159	98	96	84	92	65	63	65	63	80.8	90.7	103.6	100	105	103	112	116	294.14	238.14	348.29	349.93	10.3223	9.3138	11.6845	6.70326	55.5	48.4	60.6	63.4	7.7	7.2	8	8.3	9.4	8.8	9.8	9.9	35.0927	39.1114	33.5483	19.156	27.2	32.8	35.8515	30.5037	62	64
160	96	94	92	92	62	63	62	64	52.8	54.7	74.6	82	105	103	112	111	256.83	281.99	402.94	420.07	3.73443	6.82601	10.2187	10.692	50.7	53	68.1	68	6.9	7.2	8.2	8.4	9.5	9.6	10.6	10.5	14.5407	24.207	25.3603	25.4528	31.3	30.5	31.7206	30.0834	73	68
161	90	94	74	68	58	52	56	54	68.6	72.1	87.6	93.2	105	96	107	102	368.53	374.76	509.53	647.02	6.43028	8.23622	11.93	14.9197	81.6	79.4	92.9	109.8	8.8	8.8	9.7	10.5	11.9	11.6	12.4	13.4	17.4486	21.9773	23.4137	23.0591	32.2	30.2	29.9308	29.2617	88	87
162	94	94	88	80	62	56	62	61	64.8	61	85	96.2	98	96	104	103	507.86	398.49	600.75	560.17	5.48559	7.63431	10.0498	12.6095	103.9	84.1	111	99.9	9.9	9.1	10.5	10	13.4	11.9	13.7	12.9	10.8013	19.1581	16.7287	22.5101	32	33.9	27.4916	31.0031	86	90
163	88	90	92	88	65	66	69	67	75.4	88.7	102.2	113.4	105	103	112	116	375.24	330.16	477.99	442.58	5.90165	8.02961	13.0159	10.6289	67.9	61.9	80	73.6	8.3	7.9	9.1	8.8	10.6	10.1	11.3	10.8	15.7278	24.3205	27.2304	24.0157	33.1	29.5	31.7449	29.1992	58	52
164	100	100	68	92	58	56	59	54	74	82.4	80.6	103.4	105	103	112	110	1041.07	777.2	986.74	903.3	10.4438	11.0238	13.6738	9.58022	181.1	143.3	174.8	152.7	13	11.5	12.9	12.1	18.1	16	17.6	16.2	10.0318	14.1841	13.8576	10.6058	28.5	29.6	36.0556	32.6572	92	90
165	98	98	92	86	54	52	52	50	65	69.9	89.4	83.2	98	96	104	105	649.94	605.77	640.53	835.09	8.22801	10.2127	11.8896	10.9579	135.1	136.2	130.9	149.5	11.3	11.4	11.1	12.2	15.4	15.4	15	16	12.6597	16.8589	18.5621	13.1218	34.3	33.3	28.427	28.8249	98	95
166	100	96	84	88	62	56	56	55	84	82.8	99.6	94.8	105	103	104	103	511.66	384.04	628.31	548	7.66165	7.15276	12.7064	11.8839	101.5	86.3	115.1	102.8	9.8	9	10.7	10	13.4	12.4	14	13.1	14.9742	18.6252	20.2232	21.6859	30.7	34.4	31.402	29.6363	92	75
167	100	86	94	90	62	56	59	57	69.6	72.2	74.6	94.8	105	96	112	105	513.07	653.53	696.39	743.21	6.68485	14.3008	8.58043	13.2182	137	131.6	135.4	138.7	11.2	11.1	11.4	11.5	15.6	15	14.9	15.2	13.0291	21.8823	12.3213	17.7853	31.4	28	25.9723	30.0045	94	90
168	84	88	88	92	65	60	65	64	82.9	86.2	101.6	118.4	105	103	118	117	339.72	341.3	409.38	427.89	4.88196	11.8769	11.1495	15.5393	63.2	62.1	70.6	71.6	8.1	7.9	8.5	8.6	10.4	10.2	10.9	10.8	14.3706	34.799	27.2352	36.3162	32.2	31.4	33.5133	30.8016	71	66
169	94	94	90	92	62	60	62	60	84	82	98.2	107.8	105	103	112	110	333.11	347.36	402.86	434.59	9.65644	13.7503	12.4358	11.0215	67.3	67.7	72.8	75.3	8	8	8.5	8.7	11	11	11.1	11.1	28.9885	39.5849	30.8687	25.3607	30.2	31.4	33.6525	28.7867	81	74
170	95.8333	93.75	90	92	54	56	56	55	64.6	60.4	75.8	76.6	105	103	104	103	837.13	901.21	865.72	860.18	10.5551	10.5085	7.63133	11.2778	173.8	174.8	176.3	166.9	13	13.1	13.2	12.8	17.6	17.3	17.3	16.7	12.6086	11.6604	8.81501	13.111	32	33.6	32.4377	26.7062	99	96
171	100	100	72	40	62	63	62	61	69.6	48.2	97.2	94.8	105	110	112	111	257.68	279.75	529.65	458.88	11.8418	6.43464	14.5064	20.5605	55.1	58.1	92.3	76.6	7.1	7.2	9.3	8.5	10	10.4	12.7	11.5	45.9552	23.0013	27.3886	44.8058	34.2	36.2	24.9422	28.3502	86	100
172	78	80	92	84	58	56	52	55	72.1	83.6	84.4	98.6	105	103	112	111	1084.51	989.77	1064.58	1181.5	16.1485	22.6833	11.4163	17.3019	233.1	217.5	204.3	226.1	14.8	13.9	13.9	14.5	20.3	20	19	20.1	14.8902	22.9178	10.7238	14.644	26.9	29.9	30.0917	28.7755	87	70
173	88	96	82	90	58	60	56	54	72.6	68.5	88	93.8	105	96	104	102	736.15	727.73	749.53	814.57	12.8669	11.5965	14.3171	14.3553	160.7	156.9	154.8	159.7	12.7	12.5	12.6	12.7	16.4	16.2	15.8	16.1	17.4786	15.9352	19.1014	17.6232	27.6	30	29.5772	28.9873	91	93
174	92	96	82	96	65	60	65	63	84.2	89.8	99.4	112	105	103	112	110	300	267.33	347.9	365.07	8.86679	11.4407	12.931	11.5617	54.1	52.3	60.3	62.5	7.6	7.4	8	8.1	9.3	9.3	9.8	10	29.556	42.7967	37.1687	31.6697	32.4	31.4	31.4742	31.1752	57	66
175	92	96	92	94	58	56	56	55	81.4	84.8	96.8	102.8	105	103	112	111	866.83	1090.69	1097.02	1075.58	8.81549	14.1017	6.77087	14.0517	173.6	201	195.9	187.9	12.6	13.7	13.6	13.5	17.9	19	18.6	17.8	10.1698	12.9292	6.17206	13.0643	30.9	31.9	30.1753	29.5881	85	92
176	94	94	90	84	54	52	52	54	73.8	71.7	77.2	88.4	105	103	107	102	743.91	685.62	645.75	730.9	8.64154	9.69707	12.1684	12.6536	132.7	132.6	116.3	129.7	11	10.9	10.7	11.3	15.4	15.3	14.1	14.7	11.6163	14.1435	18.8439	17.3123	28.6	32.1	30.0848	29.3912	92	98
177	20	28	74	64	68	63	69	67	61.2	68.8	98.6	93.6	112	110	118	116	320.86	286.8	420.5	511.9	7.99025	9.12446	10.6808	19.5169	68.3	65.4	76.8	90.7	7.7	7.7	8.5	9.2	11.3	10.9	11.4	12.8	24.9026	31.8151	25.4003	38.1263	33.2	31.3	29.3412	31.1284	88	82
178	90	88	94	84	65	66	65	68	66.8	81.8	100.8	104.4	105	103	112	111	203.32	214.01	281.44	261.34	6.72272	10.7523	12.7236	12.5414	42.1	42.7	53.1	47.3	6.7	6.7	7.5	7.3	8.3	8.4	9.3	8.6	33.0646	50.2432	45.209	47.9889	32.5	32.5	26.0118	29.7952	83	49
179	100	88.6364	90	90	62	60	62	61	69.3	79.8	96.4	97	105	103	118	117	392.73	367.15	542.28	464.02	8.96369	12.1783	15.5171	14.1971	74.6	72.6	89.8	81.9	8.4	8.2	9.4	8.7	11.5	11.4	12.3	12	22.8239	33.1699	28.6146	30.5959	26	31.1	32.0199	28.7431	69	73
180	76	96	82	90	58	60	59	58	73.2	73.2	77.6	96.6	105	103	104	106	427.84	386.91	382.99	499.74	9.72059	8.41068	11.2561	12.1971	83.3	83.8	78.4	89.9	9	9	8.8	9.3	12	12.1	11.4	12.3	22.7199	21.7379	29.3901	24.4069	36.4	33.3	27.9359	29.2952	68	88
181	98	88	76	82	58	56	56	55	74.4	71.3	83.8	94.6	98	96	104	103	304.04	288.73	293.35	333.66	9.93026	9.87551	9.71789	9.17122	61.5	62.4	59.8	66.6	7.8	7.8	7.7	8.1	10.3	10.4	10	10.6	32.6605	34.2035	33.1273	27.4867	28.5	33.2	31.1121	31.5914	95	95
182	92	94	90	88	62	60	62	64	75.4	92.7	106.6	110.6	105	103	112	111	408.09	423.25	506.61	522.54	6.50158	16.7798	15.2413	17.2911	83.5	77.4	87.3	87.2	8.7	8.6	9	9.1	12.3	11.7	12.3	12.3	15.9316	39.6449	30.0849	33.0906	31.3	29.5	27.9402	32.8023	63	72
183	70	92	82	88	65	63	62	67	77.5	76.6	94.2	104	105	103	107	110	276.27	217.82	371.61	374.89	9.46121	6.88918	10.6273	10.5111	53.9	46.1	67.8	65.9	7.2	6.7	8.2	8.1	9.7	8.9	10.6	10.4	34.2466	31.6284	28.598	28.0379	28.1	32.5	31.3349	31.1206	69	58
184	90	94	72	70	65	63	62	63	81	89.8	100.4	104	105	96	112	110	444.34	348.25	499.39	490.78	8.2825	6.08176	13.4342	17.7511	74.4	65.2	83.2	81.9	8.7	8.2	9.2	9.1	11.1	10.4	11.7	11.6	18.6399	17.4636	26.9012	36.1692	31.9	32.3	31.617	32.564	78	68
185	96	96	92	88	62	60	62	64	79.2	78	98.6	93.4	105	103	112	111	303.56	279.01	335.52	353.41	9.54568	11.3203	7.905	10.1041	56.3	52.1	59.1	60	7.6	7.3	7.9	8	9.5	9.3	9.8	9.7	31.4456	40.5733	23.5604	28.5903	32.3	32.9	28.7299	30.7805	81	61
186	92	94	90	68	58	56	56	54	73.8	74.8	90.4	85	105	96	112	110	600.66	618.06	589.46	788.76	9.53005	12.5537	7.414	10.905	128.9	125.4	120	144.8	11.2	11.1	10.9	12	14.8	14.6	14.2	15.5	15.8661	20.3116	12.5776	13.8255	30.1	29.6	30.3258	30.2324	93	94
187	94	92	86	72	58	56	59	55	64	61.8	77.2	79.2	98	96	104	103	545.9	303.77	634.63	613.16	7.42452	5.43549	6.38256	5.28056	100.6	67.5	112.3	109.3	10	8.3	10.6	10.4	12.7	10.6	13.5	13.3	13.6006	17.8932	10.0571	8.61204	30.3	33.1	32.3941	29.0427	93	81
188	98	96	88	82	54	52	56	54	83.4	72.7	95.2	92.2	105	96	104	102	634.14	516.52	641.86	695.32	7.75107	7.97005	12.3577	10.0417	123.6	104.1	118.7	129.4	10.9	10	10.8	11.3	14.6	13.5	14.1	14.8	12.223	15.4304	19.253	14.4419	29.3	30.8	35.3281	33.0653	84	99
189	82	82	74	77.0833	58	56	56	54	57.4	62.8	73.6	94.6	105	103	112	105	776.53	678.92	1015.77	812.12	7.88494	6.93957	8.0273	12.4099	167	157.5	193.7	155.3	12.9	12.2	14.2	12.5	16.8	16.7	17.9	16	10.154	10.2215	7.90267	15.2809	26.6	26.9	32.7325	31.7967	96	96
190	94	96	66	76	54	52	59	55	65	76.6	72.6	81	98	103	104	103	335.08	326.65	412.31	446.99	5.70495	7.34401	6.09424	11.4603	65.9	65.8	80	79.4	8.2	8	9	8.9	10.6	10.7	11.5	11.4	17.0257	22.4827	14.7807	25.6387	28.7	30.4	36.0075	32.1109	91	85
191	96	100	86	84	62	60	62	64	79.6	79.7	98.2	100	105	103	112	111	380.16	425.64	448.28	498.11	12.4819	13.3663	14.2647	15.8414	75.8	76.2	78.5	85.8	8.3	8.5	8.7	9.1	11.7	11.5	11.5	12.2	32.8335	31.4027	31.8209	31.8031	28.4	31	35.7707	31.4423	71	75
192	96	88	80	68	58	56	59	58	65.7	71.2	94	86.4	98	96	104	103	594.92	616.08	598.76	610.17	3.85297	5.10051	7.0295	10.4435	134	138.9	125.2	114.7	11.4	11.5	10.9	10.6	15.1	15.5	14.8	13.9	6.47644	8.27892	11.7401	17.1158	27.2	31.1	30.3505	25.3534	94	94
193	98	94	94	82	62	60	59	60	75.6	81	96.8	103.4	105	103	107	110	756.01	663.21	807.36	708.79	6.90413	8.74644	8.22809	11.1268	134.8	121.7	135.8	119.8	11.4	10.6	11.6	10.9	15.4	14.9	15.2	14.2	9.13229	13.188	10.1913	15.6983	28.9	30.9	33.6158	28.7914	82	87
194	90	86	90	90	62	60	65	63	73.4	79.2	96.8	94.6	105	96	112	110	686.71	624.47	1022.08	1008.07	6.76317	10.3854	14.5633	11.8127	153.1	144.4	192	196.7	12.3	11.9	13.9	13.9	16.1	15.7	17.9	18.2	9.84869	16.6308	14.2487	11.7181	28.2	30.6	32.5362	28.0647	92	84
195	96	88	62	66	58	56	59	57	62.2	74.4	68.2	74	98	103	104	102	212.52	201.61	278.58	333.82	5.70964	5.86006	18.7826	8.8503	53.1	52.9	59.3	66.9	7.2	7.2	7.8	8.3	9.6	9.6	9.8	10.5	26.8666	29.0666	67.4226	26.5122	33.1	37.6	29.7057	26.6966	53	77
196	92	96	82	88	62	60	62	63	65.6	76.5	85.4	105.6	105	103	118	110	539.08	439.23	713.97	692.65	6.2231	10.6194	11.2907	10.8891	100.3	86.1	119.8	115	9.8	9.1	11	10.6	13.2	12.2	14.2	13.8	11.5439	24.1771	15.814	15.7209	28.2	28.5	35.627	35.0328	79	68
197	94	92	80	74	62	60	62	64	78.2	79	98	93.6	105	103	112	111	237.52	240.85	379.62	332.14	5.6675	4.50092	11.585	9.12568	45.4	46.8	63.9	58.5	7.1	7.3	8.4	8	8.5	8.5	10	9.5	23.8615	18.688	30.5174	27.4754	30.8	32.2	30.8914	31.1891	59	72
198	98	90	72	80	65	63	65	63	75.5	73.3	100.8	91.6	105	103	112	110	293.59	395.43	408	428.87	8.37189	9.10983	11.9158	11.5085	54.7	64.8	68.6	69.6	7.5	8.2	8.4	8.6	9.7	10.4	10.6	10.6	28.5153	23.0375	29.2055	26.8345	28	30.3	35.9033	33.5173	77	68
199	93.75	91.6667	90	92	62	60	59	61	67.8	73.7	91.8	79.2	105	103	112	111	943.95	979.44	1016.48	969.91	8.96228	13.3707	10.5444	7.95022	205.4	216.8	190.7	185.2	13.7	14.1	13.4	13.2	19.1	19.7	18.2	17.9	9.49445	13.6514	10.3735	8.19686	29.2	32.5	29.9504	25.0104	89	86
200	88	94	72	68	65	63	65	64	73.3	79.2	87.8	89.6	105	103	118	111	309.21	334.89	407.63	459.06	6.35233	9.13388	16.9797	17.0341	63.3	66.5	72.3	80.4	7.7	8.1	8.4	8.9	10.6	10.6	11.1	11.6	20.5439	27.2739	41.6547	37.1065	30	30.9	36.4923	34.1646	74	73
201	86	70	86	82	68	66	65	67	61.8	68.6	77.4	101.8	105	96	112	110	204.51	363.48	438.81	426.06	2.43797	9.2175	10.3174	8.58293	55.9	84.6	86.9	84	7.2	8.9	9.2	9.1	10	12	12.1	11.8	11.9211	25.359	23.5123	20.1449	32	30.1	26.8493	30.1996	80	81
202	94	74	66	84	62	60	62	61	70.8	75.2	93	97.6	105	103	112	111	311.2	302.22	442.75	451.21	6.11984	11.3101	14.2315	13.8276	65	65.2	82.1	82.4	7.7	7.8	8.9	8.9	10.9	10.8	12	11.9	19.6653	37.423	32.1435	30.6456	35.3	36.2	29.5487	27.745	89	80
203	84	92	88	88	62	60	62	63	68.6	81.3	100.4	108.4	105	103	112	110	265.27	304.33	451.68	459.81	6.57863	9.23875	10.953	12.6214	54.2	56.9	75.7	75.2	7.4	7.6	8.8	8.9	9.5	9.7	11.1	10.9	24.7994	30.3572	24.2494	27.4491	32.9	32.6	30.971	29.9264	70	74
204	94	94	80	96	65	63	62	63	72.5	88.4	108.6	105.6	105	103	112	116	467	371.69	492.73	435.07	7.95388	12.6445	14.4905	10.601	80.3	68.6	84	72.4	8.9	8.2	9.1	8.7	11.7	10.8	11.8	10.8	17.0317	34.0193	29.4086	24.3663	30.4	30.2	34.7766	34.425	76	79
205	92	98	88	90	62	60	62	61	76.4	80.6	95.8	107.6	105	103	118	117	455.68	425.47	562.71	519.85	10.9087	14.3517	13.3084	14.1931	83	77.7	92	91.5	8.9	8.7	9.5	9.5	12	11.6	12.6	12.4	23.9395	33.7315	23.6506	27.3023	30.4	33.2	32.6149	33.2285	71	68
206	92	96	86	90	62	60	62	64	71	76	89.4	108.8	105	103	112	111	340.99	327.77	476.36	468.68	8.35614	8.74526	15.4763	17.7411	73.2	68.9	84.2	83.4	8.2	8	8.9	8.9	11.6	11.1	12.2	12.1	24.5054	26.6814	32.4886	37.8534	25.5	33.2	34.2571	29.942	87	81
207	88	90	84	75.5102	62	56	56	57	67.6	79.6	99.4	97.6	105	103	112	116	567.24	690.29	624.02	765	8.1896	12.3723	2.94667	15.0263	116	125.6	112.5	134.2	10.5	10.9	10.4	11.2	14.1	14.7	13.7	15.1	14.4377	17.9233	4.72207	19.6422	31	32.8	33.3588	32.026	76	75
208	90	92	84	76	54	52	52	54	61	58.9	67.2	88.8	98	96	104	102	631.74	692.52	784.46	901.14	8.3225	10.6177	9.85857	13.9776	150.4	158.6	161.4	176.4	12.1	12.5	12.5	12.9	16.1	16.5	16.7	17.5	13.1738	15.332	12.5673	15.5111	31.3	30.6	30.5608	31.7974	96	100
209	94	98	82	76	58	52	52	50	64	74.1	70	80.8	105	96	104	102	445.91	502.31	578.43	639.15	3.96048	4.99862	9.18512	12.1337	102.9	115.3	116.1	120.7	10.1	10.7	10.8	10.9	13.2	13.9	13.8	14	8.88186	9.95121	15.8794	18.9841	32.3	32.8	30.9894	30.4092	91	90
210	74	78	80	58	58	52	56	54	67.4	77.4	93	91.2	105	103	112	116	981.24	842.89	1037.9	1373.37	12.4136	13.5016	17.0227	19.8607	218	187.3	211.7	257.9	14.4	13.5	14.2	15.7	19.6	17.8	19.3	21.2	12.6509	16.0183	16.4011	14.4613	28.9	31.5	30.3395	29.797	82	92
211	100	98	96	82	62	60	62	60	79.4	87.8	108.6	107.8	105	103	118	110	370.11	301.87	420.13	447.38	9.33185	11.9949	13.6867	16.0778	63	53.4	67.8	70.7	8.1	7.5	8.5	8.8	10.1	9.3	10.4	10.5	25.214	39.7355	32.5772	35.9377	32.1	31.7	33.524	33.2461	69	60
212	0	0	5.88235	0	NA	NA	69	NA	NA	NA	74	NA	NA	NA	118	NA	NA	NA	375.45	-	NA	NA	20.89	-	NA	NA	76	NA	NA	NA	8.8	NA	NA	NA	11.3	NA			55.6399	-			#VALUE!	#VALUE!	#VALUE!	#VALUE!
213	92	94	82	86	58	56	59	54	83	98	94.8	104	105	103	104	110	785.93	664.73	731.48	760.3	12.5964	18.1113	7.99976	13.7574	149.1	123.7	143.8	133.2	12.2	11	12	11.4	15.8	14.6	15.5	14.8	16.0274	27.246	10.9364	18.0948	29.3	31.2	35.1878	32.8411	92	73
214	100	100	86	94	65	63	65	63	97.8	97	97.6	116	105	103	112	116	321.8	271.88	438.26	429.75	8.91285	10.7234	10.9116	13.6806	58.6	52.5	71.1	70.8	7.7	7.4	8.6	8.7	9.9	9.2	10.7	10.6	27.6967	39.4421	24.8976	31.8339	31.1	31.6	33.113	33.4893	75	56
215	98	92	70	74	58	56	56	54	55.6	64.2	84	78.6	98	96	104	102	149.1	198.29	247.26	253.19	3.80821	5.52201	8.82343	7.43162	40.5	48.2	51.8	51.4	6.2	6.8	7.3	7.2	8.5	9.1	9.3	9.2	25.5416	27.8488	35.6848	29.352	33.2	38.1	27.5968	28.9051	84	90
216	68.75	83.3333	62	82	68	63	59	55	71.8	74.9	74.2	89.6	105	103	107	111	746.8	891.42	936.6	1038.08	6.23068	6.51881	11.8261	14.8598	176.5	195	180.5	197.2	13.2	13.9	13.6	14.1	17.3	18.1	17	18	8.34317	7.31288	12.6267	14.3147	29.5	29.7	28.3026	29.1257	99	94
217	100	98	80	84	68	68	72	70	82.2	78.8	82.4	93.6	112	110	118	116	379.61	371.63	541.42	570.42	6.95145	8.39985	17.0345	15.1331	82	79.4	95.8	95.1	8.6	8.5	9.5	9.6	12.2	11.9	13	12.8	18.3121	22.6029	31.4626	26.5297	31.8	30.6	27.3565	32.2759	67	56
218	92	94	80	68	58	56	56	57	62	62.3	79.4	79.6	98	96	97	102	374.41	430.85	382.58	516.55	2.1344	2.94622	5.986	7.75265	91.4	98.4	85.1	102	9.6	10.1	9.2	10.1	12.3	12.6	12	13	5.70068	6.83812	15.6464	15.0085	27.1	30.5	31.7219	31.1151	87	95
219	100	98	80	78	62	63	59	60	73.2	70.6	81.8	89.6	105	103	107	102	862.76	1047.18	958.31	847.97	3.37165	4.7674	13.8107	13.6374	179	203.7	183.1	159.4	13.2	14	13.6	12.5	17.4	18.9	17.6	16.4	3.90799	4.55261	14.4116	16.0825	30.9	31	30.9363	30.1251	90	88
220	88	90	86	70	58	56	59	61	72.6	74.3	82.6	83.6	98	96	104	103	410.27	493.79	526.9	484.86	3.82915	4.6685	6.74558	7.39686	93.9	103.8	104.9	101.8	9.6	10.1	10.2	9.9	12.5	13.2	13.3	13.1	9.33327	9.45451	12.8024	15.2557	30.2	32	30.3287	31.1207	92	93

## Sheet: Weather data 21_22
Day after sowing	Temperature, average at 1,5m		Total rainfall (mm), from start of year		Sun light (MJ/m2)			Temperature sum (avg.temp/day), from sowing day			Day after sowing	Rainfall (mm)/day, from sowing day
	2022	2021	2022	2021	2022	2021	Day after sowing	2022	Day after sowing	2021		2022	2021
0	9.1	5.5	174.4	122	14.1	20	0	9.1	0	5.5	0	0
1	9.7	6.2	177.6	122	7	17.9	1	18.8	1	11.7	1	3.2	0
2	6.5	8.9	179.2	122	5.1	14.6	2	25.3	2	20.6	2	1.6	0
3	6.1	9.7	179.2	122	22.3	20.2	3	31.4	3	30.3	3	0	0
4	7.1	10.1	179.2	122	22	23.2	4	38.5	4	40.4	4	0	0
5	6.8	9.4	179.2	122	20.4	23.7	5	45.3	5	49.8	5	0	0
6	8.4	6.8	179.2	125.6	22.2	19.8	6	53.7	6	56.6	6	0	3.6
7	9.1	7.2	179.2	126.4	20.1	23.4	7	62.8	7	63.8	7	0	0.8
8	10.6	7.4	179.2	126.4	22.7	24.8	8	73.4	8	71.2	8	0	0
9	10.6	5	179.2	126.4	23.1	25.8	9	84	9	76.2	9	0	0
10	9.3	4.1	179.2	126.4	18.3	25.4	10	93.3	10	80.3	10	0	0
11	8.6	4.8	179.2	126.4	12.9	25.5	11	101.9	11	85.1	11	0	0
12	7.2	4.6	179.2	126.4	24.1	25.5	12	109.1	12	89.7	12	0	0
13	8.1	6.6	179.2	126.4	24.2	21.9	13	117.2	13	96.3	13	0	0
14	6.7	7.9	179.2	130.8	15.2	9.7	14	123.9	14	104.2	14	0	4.4
15	7	7.5	179.2	131	24.4	19.2	15	130.9	15	111.7	15	0	0.2
16	8.3	6.8	179.2	131	24.6	24.9	16	139.2	16	118.5	16	0	0
17	8.8	7.7	179.2	131	24	22.4	17	148	17	126.2	17	0	0
18	8.6	6.6	179.2	136	19.6	11.1	18	156.6	18	132.8	18	0	5
19	9.8	7.3	179.2	142.4	25.2	4.1	19	166.4	19	140.1	19	0	6.4
20	10.5	7.5	179.2	151.6	21.7	6.5	20	176.9	20	147.6	20	0	9.2
21	9.8	7.1	179.2	158.2	24	15.8	21	186.7	21	154.7	21	0	6.6
22	10.1	7.1	179.2	160.8	23.8	20	22	196.8	22	161.8	22	0	2.6
23	12.5	8.1	179.2	160.8	19.5	22.2	23	209.3	23	169.9	23	0	0
24	12.8	13.2	179.2	164.2	19.5	21.3	24	222.1	24	183.1	24	0	3.4
25	11.5	17	179.2	164.2	26.5	18.2	25	233.6	25	200.1	25	0	0
26	10.8	14.6	179.2	164.4	26.4	14.5	26	244.4	26	214.7	26	0	0.2
27	14.2	13.9	182.8	164.4	14.7	21.1	27	258.6	27	228.6	27	3.6	0
28	12.9	13	186.8	170.6	12.6	17.8	28	271.5	28	241.6	28	4	6.2
29	12.5	12.8	191	170.8	20.9	20.2	29	284	29	254.4	29	4.2	0.2
30	11.7	10.1	193.6	171.6	13	12.9	30	295.7	30	264.5	30	2.6	0.8
31	12.6	10.8	193.8	174.4	20.7	14.2	31	308.3	31	275.3	31	0.2	2.8
32	12.2	11.7	193.8	174.4	26	24.4	32	320.5	32	287	32	0	0
33	12.1	11.2	193.8	174.4	19.4	25.3	33	332.6	33	298.2	33	0	0
34	12.2	11	193.8	175	26.7	25.4	34	344.8	34	309.2	34	0	0.6
35	11.2	11	193.8	175	25.7	20.9	35	356	35	320.2	35	0	0
36	17.3	11	196.4	175.6	15.4	17.1	36	373.3	36	331.2	36	2.6	0.6
37	13.9	11.9	196.4	178.8	18.6	21.8	37	387.2	37	343.1	37	0	3.2
38	11.7	10.8	205.6	179.4	14.8	9.8	38	398.9	38	353.9	38	9.2	0.6
39	11.8	12.5	205.6	179.4	21.8	27.8	39	410.7	39	366.4	39	0	0
40	12.5	10.9	205.6	193	28.1	4.7	40	423.2	40	377.3	40	0	13.6
41	13.5	10.2	208.4	195	8.2	14.9	41	436.7	41	387.5	41	2.8	2
42	13.6	10.9	209.2	197	22.6	9.6	42	450.3	42	398.4	42	0.8	2
43	13.7	11.5	209.8	197	21.3	18.4	43	464	43	409.9	43	0.6	0
44	11.4	12.2	215.4	197	20.7	25.5	44	475.4	44	422.1	44	5.6	0
45	12.2	12.7	218.4	197	17.3	29.7	45	487.6	45	434.8	45	3	0
46	13.6	14.7	218.4	197	19.7	29.8	46	501.2	46	449.5	46	0	0
47	10.9	14	232.8	198.6	9.7	17.6	47	512.1	47	463.5	47	14.4	1.6
48	11.9	13.3	233	198.6	16	20.3	48	524	48	476.8	48	0.2	0
49	12.4	16.4	233.2	198.6	23.2	28.2	49	536.4	49	493.2	49	0.2	0
50	12.2	16.3	233.4	198.6	10.2	20.3	50	548.6	50	509.5	50	0.2	0
51	12.3	16.6	233.4	198.6	16	29.7	51	560.9	51	526.1	51	0	0
52	12.7	16.6	233.4	198.6	25.9	28.4	52	573.6	52	542.7	52	0	0
53	14.2	17	233.4	198.6	29.4	25	53	587.8	53	559.7	53	0	0
54	14.4	16.2	237	198.6	8.5	29.8	54	602.2	54	575.9	54	3.6	0
55	15.1	16.2	237.2	198.6	18.3	29.2	55	617.3	55	592.1	55	0.2	0
56	14.5	16.3	237.2	198.6	19.2	26.2	56	631.8	56	608.4	56	0	0
57	17	18.3	237.2	198.6	20.7	21	57	648.8	57	626.7	57	0	0
58	16.7	16.7	237.2	198.6	20	22.3	58	665.5	58	643.4	58	0	0
59	17.5	14.9	237.2	198.6	16.8	28.8	59	683	59	658.3	59	0	0
60	16	16.8	238	198.6	23.2	20.8	60	699	60	675.1	60	0.8	0
61	14.3	15.2	240	198.6	24.6	29	61	713.3	61	690.3	61	2	0
62	14.8	14.7	240	198.6	15.9	28.8	62	728.1	62	705	62	0	0
63	15.3	20.3	240	198.6	23.8	29.7	63	743.4	63	725.3	63	0	0
64	15.9	24.2	240	198.6	28.3	29.3	64	759.3	64	749.5	64	0	0
65	17.5	23.9	240	198.6	23.6	28.1	65	776.8	65	773.4	65	0	0
66	17.7	21.3	240.4	198.6	22.9	21.8	66	794.5	66	794.7	66	0.4	0
67	12.3	17.6	256.6	199.8	7.1	19.7	67	806.8	67	812.3	67	16.2	1.2
68	12.5	16.5	263.8	199.8	11.5	27.2	68	819.3	68	828.8	68	7.2	0
69	16.6	16	265.8	199.8	28.8	13.8	69	835.9	69	844.8	69	2	0
70	15.9	16.9	265.8	199.8	15.1	16.2	70	851.8	70	861.7	70	0	0
71	16.9	16.2	265.8	199.8	27.7	18.7	71	868.7	71	877.9	71	0	0
72	19.7	17.5	265.8	199.8	30.1	19.3	72	888.4	72	895.4	72	0	0
73	21	18	266	199.8	21	21.7	73	909.4	73	913.4	73	0.2	0
74	22.4	17.7	266.2	199.8	23.1	29.1	74	931.8	74	931.1	74	0.2	0
75	23.4	20.3	267	199.8	25	25.2	75	955.2	75	951.4	75	0.8	0
76	17.8	18.3	267.4	203	23.6	5.2	76	973	76	969.7	76	0.4	3.2
77	17.6	16.4	267.4	222.6	27.9	6.5	77	990.6	77	986.1	77	0	19.6
78	17.9	18.9	267.4	224.8	21.2	9.8	78	1008.5	78	1005	78	0	2.2
79	18.5	20	270.4	224.8	16.8	16	79	1027	79	1025	79	3	0
80	18.2	19.8	270.4	224.8	29.3	16.2	80	1045.2	80	1044.8	80	0	0
81	19.4	19.7	275.8	225.6	25.6	21	81	1064.6	81	1064.5	81	5.4	0.8
82	17.6	19.4	275.8	233.4	23.4	22.4	82	1082.2	82	1083.9	82	0	7.8
83	16.9	18.5	276.4	233.4	20.6	15.1	83	1099.1	83	1102.4	83	0.6	0
84	16.3	19	276.4	233.4	20.4	22.2	84	1115.4	84	1121.4	84	0	0
85	16.9	18.1	281.8	236.2	16.1	10.9	85	1132.3	85	1139.5	85	5.4	2.8
86	16.9	17.3	281.8	252.6	14.4	5.9	86	1149.2	86	1156.8	86	0	16.4
87	16.6	18.6	281.8	252.6	20.2	26.2	87	1165.8	87	1175.4	87	0	0
88	16.9	20.5	281.8	252.6	30	26.2	88	1182.7	88	1195.9	88	0	0
89	17.5	22	281.8	252.6	24.4	22.8	89	1200.2	89	1217.9	89	0	0
90	18.3	23.6	281.8	252.6	28.5	23.8	90	1218.5	90	1241.5	90	0	0
91	20.5	22.9	281.8	252.6	25.4	23.6	91	1239	91	1264.4	91	0	0
92	16.3	24.5	282.8	252.6	17.4	23.7	92	1255.3	92	1288.9	92	1	0
93	16	22.6	284	252.6	23	28.1	93	1271.3	93	1311.5	93	1.2	0
94	16.1	20	290.2	252.6	24	22.6	94	1287.4	94	1331.5	94	6.2	0
95	17.2	18.5	290.2	252.6	21.2	13.4	95	1304.6	95	1350	95	0	0
96	18.9	18.2	290.2	252.6	9.9	21.4	96	1323.5	96	1368.2	96	0	0
97	20.3	18.7	290.2	252.6	25.6	22.1	97	1343.8	97	1386.9	97	0	0
98	22.7	18.2	290.2	252.6	26.6	21.9	98	1366.5	98	1405.1	98	0	0
99	24.1	18	290.2	252.6	23	27	99	1390.6	99	1423.1	99	0	0
100	18.2	20	290.2	252.6	17	26.1	100	1408.8	100	1443.1	100	0	0
101	15.2	21.7	294.4	252.6	4.9	22.7	101	1424	101	1464.8	101	4.2	0
102	17.6	23.5	295	252.6	20.1	13.9	102	1441.6	102	1488.3	102	0.6	0
103	21.9	22.2	300.4	252.6	18.7	19.7	103	1463.5	103	1510.5	103	5.4	0
104	17.1	20	300.4	253.4	17.5	17.3	104	1480.6	104	1530.5	104	0	0.8
105	14.8	18.6	302.2	254.8	10.8	17.2	105	1495.4	105	1549.1	105	1.8	1.4
106	15.3	19.2	302.2	255	27.3	15.1	106	1510.7	106	1568.3	106	0	0.2
107	16.4	17.9	302.2	257.6	24.4	13.8	107	1527.1	107	1586.2	107	0	2.6
108	18.2	18.3	302.2	257.6	22	24.2	108	1545.3	108	1604.5	108	0	0
109	18.4	17.4	302.2	257.8	22.2	17.9	109	1563.7	109	1621.9	109	0	0.2
110	17.4	16	302.6	258.8	13.9	12.2	110	1581.1	110	1637.9	110	0.4	1
111	17	15.6	303	258.8	21.1	25.7	111	1598.1	111	1653.5	111	0.4	0
112	23.2	15.6	303	260	20.8	19.6	112	1621.3	112	1669.1	112	0	1.2
113	24.1	17.2	306	261.8	22.1	15.7	113	1645.4	113	1686.3	113	3	1.8
114	16.8	17.1	316.6	262.8	9.5	12.9	114	1662.2	114	1703.4	114	10.6	1
115	16.8	17.7	316.6	262.8	20.5	19	115	1679	115	1721.1	115	0	0
116	16.1	16.6	316.6	265.4	9	12	116	1695.1	116	1737.7	116	0	2.6
117	16.7	16.3	316.6	266	16.5	16.3	117	1711.8	117	1754	117	0	0.6
118	16.3	17.7	316.6	266	24.2	18.6	118	1728.1	118	1771.7	118	0	0
119	17.3	17.9	316.6	266	24	20.2	119	1745.4	119	1789.6	119	0	0
120	18.8	20.3	316.6	266	24.2	17.4	120	1764.2	120	1809.9	120	0	0
121	19.6	17.9	316.6	266.6	23.8	8.8	121	1783.8	121	1827.8	121	0	0.6
122	20.2	18.2	316.6	268.4	23.2	16.2	122	1804	122	1846	122	0	1.8
123	22	16	316.6	270.8	22.6	7.1	123	1826	123	1862	123	0	2.4
124	24	13.8	316.6	304.2	18.4	4.5	124	1850	124	1875.8	124	0	33.4
125	22.8	16.1	318.4	304.4	20.1	6.8	125	1872.8	125	1891.9	125	1.8	0.2
126	21	16.5	318.4	304.4	18.9	13.3	126	1893.8	126	1908.4	126	0	0
127	21.9	16.3	324.4	304.4	18	13.5	127	1915.7	127	1924.7	127	6	0
128	20.5	15.2	325.2	304.4	5.5	23	128	1936.2	128	1939.9	128	0.8	0
129	20.2	14.5	325.2	304.4	16	21.1	129	1956.4	129	1954.4	129	0	0
130	18.3	14.7	325.2	304.4	21.1	19.8	130	1974.7	130	1969.1	130	0	0
131	17.5	14.8	325.2	304.4	19.7	20.8	131	1992.2	131	1983.9	131	0	0
132	17.3	16	325.2	305.6	19.2	7.5	132	2009.5	132	1999.9	132	0	1.2
133	18.1	13.3	325.2	310	21.3	7.9	133	2027.6	133	2013.2	133	0	4.4
134	18.8	15.3	325.2	317	14.2	12.8	134	2046.4	134	2028.5	134	0	7
135	21.2		325.2		18.7		135	2067.6	135	2028.5	135	0
136	19.6		341.6		3.1		136	2087.2	136	2028.5	136	16.4

## Sheet: Soil condition field management
Soil parameter before fertilization					Field management
	2021	2022			2021	Fertilization prior to sowing: 300 kg/ha PK11-21
pH	6,8	7				Herbicide application: Corum® (imazamox och bentazon), 17th May
P-AL mg/100g	7,2	6,6				Insecticide application: MAVRIK® AQUAFLO, 30th June
Class	III	III			2022	Fertilization prior to sowing: 350 kg/ha PK11-21
K-AL mg/100g	11,2	7,2				Herbicide application: Corum® (active compounds Imazamox and Bentazon) and Dash® , 13th April
Class	III	II				Insecticide application: Teppeki® (active compounds Flonicamid), 8th June
Mg-AL mg/100g	10	6,5
K/Mg-AL	1,1	1,1
Ca-AL mg/100g	344	301
Al-AL mg/100g	16	13
Fe-AL mg/100g	28	13
K-HCl mg/100g	116,6	70,8
Class	3	2
P-HCl mg/100g	48	40,1
Class	3	2
Cu-HCl mg/Kg	10,3	7,4
B mg/Kg	NA
Loam %	2,4	2,6
Clay %	22	15
Silt %	21	27
Sand %	54	56
