# Supplementary material for: Novel SNP markers for flowering and seed quality traits in faba bean (Vicia faba L.): characterization and GWAS of a diversity panel
Source: Front Plant Sci. 2024 Mar 6;15:1348014. doi: 10.3389/fpls.2024.1348014 (PMC10950902; doi:10.3389/fpls.2024.1348014)
Supplement: Supplementary file 2 [file DataSheet_2.xlsx]

## Sheet: Sheet1
SNPname	CloneID	AlleleSequenceRef	AlleleSequenceSnp	Chrom_Vicia_faba_hedin_v1	ChromPosSnp_Vicia_faba_hedin_v1	AlnCnt_Vicia_faba_hedin_v1	AlnEvalue_Vicia_faba_hedin_v1	Strand_Vicia_faba_hedin_v1	SNP	SLU_ID_1	SLU_ID_127	SLU_ID_140	SLU_ID_155	SLU_ID_16	SLU_ID_27	SLU_ID_39	SLU_ID_57	SLU_ID_65	SLU_ID_80	SLU_ID_94	SLU_ID_110	SLU_ID_6	SLU_ID_129	SLU_ID_144	SLU_ID_158	SLU_ID_18	SLU_ID_29	SLU_ID_40	SLU_ID_58	SLU_ID_66	SLU_ID_81	SLU_ID_96	SLU_ID_112	SLU_ID_8	SLU_ID_130	SLU_ID_146	SLU_ID_159	SLU_ID_19	SLU_ID_30	SLU_ID_43	SLU_ID_59	SLU_ID_67	SLU_ID_82	SLU_ID_99	SLU_ID_113	SLU_ID_9	SLU_ID_132	SLU_ID_147	SLU_ID_161
D00001	39972865	TGCAGATTTACCTCTAGATAAAGATCGCCGAAACGGATTTTATCACCCTGTTGTACATAAACATCTGCT	TGCAGATTTACCTCTAGATAAAGATCGCCGAAACGGATTTTATCACCCTGTTCTACATAAACATCTGCT	chr1S	1380198623	1	9.88e-28	Minus	52:G>C	0	0	-	-	0	0	0	0	0	0	0	0	0	0	0	0	0	0	-	0	0	0	0	0	0	0	0	-	0	0	0	0	0	0	0	-	0	0	-	0
D00011	3527788	TGCAGAAAAGATTCAATTTCAAAATGAGTTGGAATCCGCACATGGAAGCCATTACAATAACATCAGCTA	TGCAGAAAAGATTCAATTTCAAAATGAGTTGGAATCCGCACATGGAAGCCATTACAATAACATCAGTTA	chr1S	241711777	1	9.88e-28	Plus	66:C>T	0	-	0	-	0	0	0	0	0	0	0	0	0	0	-	0	2	0	0	0	0	2	0	0	0	0	-	0	0	0	0	0	0	0	0	0	0	-	0	0
D00026	39963333	TGCAGAAAGCTGTTGAGAAACTCATGCAGAGAGGTATCACCAGCCACTGCAAACACAATCCAAACAGAT	TGCAGAAAGCTGTTGAGAAACTCATGCAGAGAGGTATCACCAGCCACCGCAAACACAATCCAAACAGAT	chr2	1065037031	1	9.88e-28	Minus	47:T>C	0	0	0	0	0	0	0	0	-	0	0	0	0	0	-	0	0	0	0	0	0	0	0	0	0	-	0	0	0	0	0	0	-	0	0	-	0	0	0	0
D00032	39978903	TGCAGAACACAATGCTGATATACATGTGATTGTAAAAATTGAAAGTGCTGATTCCATACCAAATCTTCA	TGCAGAACACAATGCTGATATACATGTGATTGTAAAAATTGAAAGTGCTGATTCCATACCAAAGCTTCA	chr1L	1153750941	1	9.88e-28	Minus	63:T>G	0	-	0	-	0	0	0	0	0	0	0	0	0	0	0	0	0	0	0	0	0	0	0	0	0	0	0	0	0	0	-	0	0	0	0	0	-	0	0	0
D00036	3519472	TGCAGAACATGTTGGATCTGTTATGTTTGCTGTCAAAGACAAACTTGTAAGTATTATCTATAACTAGTG	TGCAGAACATGTTGGATCTGTTATGTTTGCTGTCAAAGACAAACTTGTAAGTATTATCTATAACTAGCG	chr2	591531383	1	9.88e-28	Plus	67:T>C	0	0	0	-	0	0	0	0	0	0	-	0	0	0	0	-	0	0	0	0	0	0	0	0	0	0	-	0	0	0	0	0	0	0	0	0	0	0	0	-
D00052	39972242	TGCAGAAGCACGGTACCATCATTGCATTTATCAGTAACATGTGTCCTCACATAGAGAGGATGTGTAAAA	TGCAGAAGCACGGTACCATCATTGCACTTATCAGTAACATGTGTCCTCACATAGAGAGGATGTGTAAAA	chr1S	478476228	1	9.88e-28	Plus	26:T>C	0	0	0	0	0	0	-	0	0	0	-	0	0	-	0	0	0	0	0	0	-	0	-	0	0	0	0	0	0	0	-	0	0	0	0	0	0	0	0	0
D00061	3523444	TGCAGAAGCTTGCAGAAAGCCGTGGTATAGCTTTGTTTGCAATTGATGAGGTGCACTGTGTTTCTAAAT	TGCAGAAGCTTGCAGAAAGCCGTGGTATAGCTTTGTTTGCAATTGATGAGGTGCATTGTGTTTCTAAAT	chr3	536119930	1	9.88e-28	Minus	55:C>T	0	0	0	0	0	0	-	0	0	0	-	-	0	0	1	0	0	0	2	0	0	0	0	0	0	0	0	0	0	0	0	0	0	-	0	-	0	2	0	-
D00072	3525194	TGCAGAATAAAGAATATTAGCACTGAAACTTAGAATACAAAGGATATGACATTTTCTTGATCCATCACC	TGCAGAATAAAGAATATTAGCACTGAAACTTAGAATACAGAGGATATGACATTTTCTTGATCCATCACC	chr1L	601054810	1	9.88e-28	Minus	39:A>G	2	0	0	0	0	0	0	0	0	0	-	0	0	2	2	0	0	0	-	0	0	0	0	1	0	0	0	0	0	0	0	0	0	0	0	0	0	0	0	0
D00075	39972319	TGCAGAATACTTGTAAATTGTATGAAATTATTTACTGGCCAATTAGTGAGAGTGTACATTACAACCAAT	TGCAGAATACTTGTAAATTGTATGAAATTATTTACTGGCCAATTTGTGAGAGTGTACATTACAACCAAT	chr1L	1420971297	1	9.88e-28	Minus	44:A>T	0	-	0	2	0	0	0	0	0	0	-	0	0	0	0	-	0	0	0	-	0	0	0	0	0	-	-	0	0	0	0	0	0	0	0	0	2	-	0	0
D00078	3506722	TGCAGAATATTAGTACTACTAATCAATCAGAGACTCAAAATTTAGAAGGGAGTGCAGCAAAATTGCAGA	TGCAGAATATTAGTACTACTAATCAATCAGAGACTCAAAATTTAGAAGGTTGTGCAGCAAAATTGCAGA	chr5	297051030	1	5.99e-20	Plus	49:G>T	0	0	0	0	0	0	0	0	1	0	0	0	0	0	-	-	0	0	0	0	0	-	0	0	0	2	-	0	0	0	0	0	-	0	2	0	0	0	0	0
D00082	39963763	TGCAGAATGCTCTCATTCTTTCCATTTCCACTGTATCACTTCCAATGTAAAACACGGGAACCAAATTTG	TGCAGAATGCTCTCATTCTTTCCATTTCCACTGTATCACTTCCAATGTAAAACACGGGAACCAATTTGT	chr6	211813098	1	9.88e-28	Minus	64:A>T	0	-	0	0	0	0	0	0	0	0	0	0	0	0	0	0	0	0	0	0	0	0	-	0	0	-	0	-	0	0	0	-	0	0	-	0	0	0	0	0
D00088	39963816	TGCAGAATTTGATGAGGCTGCTATTCAGGCTTCTCTTCAATCAGATGCATCTGACCTTAGGTATTTGAA	TGCAGAATTTGATGAGGCTGCTATTCATGCTTCTCTTCAATCAGATGCATCTGACCTTAGGTATTTGAA	chr2	792627654	1	9.88e-28	Plus	27:G>T	0	0	0	0	0	0	0	0	0	0	0	0	0	0	-	0	0	0	0	0	0	0	0	0	0	-	0	-	0	0	0	0	0	-	0	0	0	0	1	0
D00091	39977055	TGCAGACAATACAGCCAGGAATCATAAATATCAATATCAGAGTTTCTTGTTCAAAAATAAATAAATAAA	TGCAGACAATACAGCCAGGAATCATAAATATCAATATCAGAGTTTCTTGTTCACAAATAAATAAATAAA	chr3	1089860590	1	9.88e-28	Minus	53:A>C	0	0	0	0	0	0	0	-	0	0	0	0	1	0	0	0	0	0	0	2	-	0	0	0	0	0	0	0	0	0	0	0	0	0	0	0	0	0	0	0
D00098	3522105	TGCAGACAGGGGGTCAGATCGGGTCTGCTTCCACCTTTAGGGATTCTTTTAGTAGTCTCTGTAAGTTTG	TGCAGACAGGGGGTCAGATCTGGTCTGCTTCCACCTTTAGGGATTCTTTTAGTAGTCTCTGTAAGTTTG	chr2	567631786	1	9.88e-28	Minus	20:G>T	0	0	0	1	0	0	0	0	0	0	0	0	0	-	0	-	0	0	-	0	-	0	0	-	0	-	0	-	0	0	0	-	0	0	0	0	0	0	0	0
D00111	39963967	TGCAGACGTCCTTCGTAGAATTGGTGAAGATGGAAGAATTATACAGGAATTTATTCAGCTAGGTGCTAA	TGCAGACGTCCTTCGAAGAATTGGTGAAGATGGAAGAATTATACAGGAATTTATTCAGCTAGGTGCTAA	chr1S	1327008552	1	9.88e-28	Minus	15:T>A	0	0	0	0	0	0	-	0	0	0	-	0	-	0	-	0	0	0	0	0	-	0	0	0	0	0	0	0	0	0	0	0	0	0	0	-	0	-	-	0
D00116	39963985	TGCAGACTCTCTCTGCTTGGAAGTTCAAAAGAATGGCTATCATGATAGTTTTTCACAGTGTGACTATGA	TGCAGACTCTCTCTGCTTGGAAGTTCAAAAGAATGGCTATCATAATAGTTTTTCACAGTGTGACTATGA	chr1S	1117090541	1	9.88e-28	Plus	43:G>A	0	0	0	0	0	0	0	0	0	0	0	0	0	0	-	-	0	0	0	0	0	0	-	-	0	0	0	0	0	0	0	0	-	0	0	0	0	0	0	0
D00118	39963993	TGCAGACTGCATTTTTCTCACAATTTCTTCAAAAGTTTCATCAGAAGTCTGGTCCTCCGTTTTGATCTC	TGCAGACTGCATTTTTCTCACAATTTCTTCAAAAGTTTCATCAGAAGTCGGGTCCTCCGTTTTGATCTC	chr6	10422565	1	9.88e-28	Plus	49:T>G	0	0	0	-	0	0	0	0	0	0	0	0	0	0	0	0	0	0	0	0	0	0	0	0	0	0	-	0	0	0	2	0	0	0	0	-	0	0	0	0
D00132	3520472	TGCAGAGACCTTGAGAGAAACAAAACATGATCCACCATCTGCGCCTCCAAAGCCAGAGGAAACTGGTGA	TGCAGAGACCTTGAGAGAAACAAGACATGATCCACCATCTGCGCCTCCAAAGCCAGAGGAAACTGGTGA	chr1L	454383018	1	9.88e-28	Minus	23:A>G	0	2	-	-	0	0	-	0	0	0	0	0	0	-	0	0	0	0	0	0	0	0	-	-	0	0	0	0	0	0	0	-	0	0	0	0	0	0	-	0
D00134	13904411	TGCAGAGAGAATCGTAATACCAGGAGGGCTTATTAGCATAGTCGTATATGTCGGCCACCCTGGTGGAAG	TGCAGAGAGAATTGTAATACCAGGAGGGCTTATTAGCATAGTCGTATATGTCGGCCACCCTGGTGGAAG	chr1S	1454365330	1	9.88e-28	Minus	12:C>T	0	0	0	2	0	0	0	0	0	0	0	0	0	0	0	0	0	0	0	0	0	0	0	0	0	0	-	0	0	0	0	0	2	0	-	2	0	0	0	0
D00139	39972531	TGCAGAGAGTACAAAGCAGTTAGAACAGGTTTTCCTCCATTGCTTGGTTGTAAATGCTGTTTTTTTATT	TGCAGAGAGTACAAAACAGTTAGAACAGGTTTTCCTCCATTGCTTGGTTGTAAATGCTGTTTTTTTATT	chr1L	1078137990	1	9.88e-28	Plus	15:G>A	0	0	0	0	0	0	0	0	0	0	0	0	0	-	0	1	0	0	0	-	0	0	0	-	0	0	-	0	0	0	0	0	-	2	0	0	0	0	0	0
D00154	39972520	TGCAGAGGCTCGAGAGCGTGCAATGGAAAAAGTAAGGGTTGAGAGAGCTGCATTTGGGTCCAGAGAACG	TGCAGAGACTCGAGAGCGTGCAATGGAAAAAGTAAGGGTTGAGAGAGCTGCATTTGGGTCCAGAGAACG	chr4	776198315	1	9.88e-28	Minus	7:G>A	0	-	0	0	0	0	0	0	0	0	1	0	0	0	0	0	0	0	0	0	-	0	0	-	0	0	0	0	0	0	0	0	0	0	0	0	0	0	0	0
D00175	3522396	TGCAGATAATATTTTTATAAAAATCTTCTATTCATATTTGAATCTATGTGAACTGTTTGGAAAAGGTGT	TGCAGATAATATTTTTATAAAAATCTTCTATTCATAATTGAATCTATGTGAACTGTTTGGAAAAGGTGT	chr5	316288873	1	9.88e-28	Minus	36:T>A	0	-	0	0	1	1	0	0	1	1	0	2	0	0	-	0	0	0	1	0	-	0	0	1	-	0	1	0	0	0	0	-	0	0	1	0	0	0	2	0
D00186	32608413	TGCAGATAGCGACGATGGAGATAATAAGTTGGCCCATTTGTAGGTCATATTGGGGGCTTTTGGATTTCA	TGCAGATAGCGACGATGGAGATAATAAGTTGGCCCATTTGTAGGTCATATTGGGGGATTTTGGATTTCA	chr3	896506345	1	9.88e-28	Minus	56:C>A	0	0	0	0	0	0	0	0	-	0	0	-	0	-	0	-	0	0	0	0	0	-	-	0	0	0	0	0	1	0	0	0	0	0	0	-	0	0	0	0
D00207	39964554	TGCAGATGATAAAAAACTGGAATTGGCACACCCCATGTCCTTTGTCGTGATATACACCAATCAGAGCGA	TGCAGATGATAAAAAACTGGAATTGGCACTCCCCATGTCCTTTGTCGTGATATACACCAATCAGAGCGA	chr1L	1441114924	1	9.88e-28	Plus	29:A>T	0	0	0	0	0	0	0	0	0	-	0	-	0	0	0	0	0	0	0	0	0	0	0	0	0	0	0	0	0	0	0	0	-	0	0	0	0	-	0	0
D00210	39972793	TGCAGATGGAAGGCAGCTCCTGGAGTCCTCCAAAACAGCTTTAGACAAGGGAAAGCTTGAAGATGCTGT	TGCAGATGGAAGGCAACTCCTGGAGTCCTCCAAAACAGCTTTAGACAAGGGAAAGCTTGAAGATGCTGT	chr4	284555072	1	9.88e-28	Plus	15:G>A	0	0	0	0	0	0	0	0	0	0	0	0	0	0	0	0	0	0	0	-	0	0	0	0	0	0	0	0	0	0	-	0	-	0	0	0	0	0	0	0
D00219	3521371	TGCAGATTCGTAATTGCTTGGCCCCGGAGGATCTTATAGGTGAGATAGATTTGAACATTATCTCTAGGA	TGCAGATTCGCAATTGCTTGGCCCCGGAGGATCTTATAGGTGAGATAGATTTGAACATTATCTCTAGGA	chr2	485697357	1	9.88e-28	Minus	10:T>C	-	0	-	-	0	0	-	0	-	-	0	0	0	0	2	0	0	0	0	0	0	0	0	0	0	-	0	0	0	0	-	0	0	0	0	0	0	-	0	0
D00223	3523687	TGCAGATTGGGGCATTTCATACTTTAGAAATTGAGCTACAGCGACCCTTTGTGCTCAGGAAGGTAATTC	TGCAGATTGGGGCATTTCATACTTTAGAAATTGAGCTACAGCGGCCCTTTGTGCTCAGGAAGGTAATTC	chr3	483964717	1	9.88e-28	Minus	43:A>G	0	0	-	-	2	0	0	-	1	0	2	2	0	0	0	0	0	0	0	0	0	-	0	0	0	1	0	0	0	2	1	0	0	0	1	-	0	2	2	0
D00225	22856645	TGCAGATTGTTCTTGCCCTTGCAATTTTGTATAAGAATGTTGGAATAGCTTCCATTGCGACACTTGTTG	TGCAGATCGTTCTTGCCCTTGCAATTTTGTATAAGAATGTTGGAATAGCTTCCATTGCGACACTTGTTG	chr5	892656002	1	9.88e-28	Minus	7:T>C	0	0	0	0	0	0	0	0	0	0	0	0	0	0	0	-	0	0	0	0	-	0	0	-	0	0	-	0	0	0	0	0	-	0	-	0	0	-	0	0
D00230	32608434	TGCAGATTTTCCATTGTGATTGATCAGGGCTGCCTAATATTTCCAACAACCTAGTTCTATTCGGAGAAT	TGCAGATTTTCCATTGTGATTGATCAGGGCTGCCTAATATTTCCAACAACCTAGTTCTATTTGGAGAAT	chr5	814093144	1	9.88e-28	Minus	61:C>T	0	0	-	0	0	0	1	0	0	2	0	0	0	0	-	1	1	0	0	0	0	2	0	-	0	0	-	0	0	0	0	0	0	-	0	0	0	0	-	0
D00234	3526151	TGCAGATTTTTTTTATGGGAATATAAAAACTAAAACAAGCATATACAAAAGGAATAATTTTACAGATCG	TGCAGATTTTTTTTATGGGAATATAAAAACTAAAACAAGCATATACAAAGGGAATAATTTTACAGATCG	chr6	369890099	1	6.57e-24	Minus	49:A>G	0	-	0	0	0	0	0	0	-	0	0	2	0	0	0	0	0	2	0	0	0	0	2	0	-	0	0	0	0	0	0	1	0	-	0	0	0	0	0	0
D00238	39976850	TGCAGCAAAGCATGGACATTGACGACTTCGGCATTGACTCTTTGCACAATGACAGCCACGAAATCGGTT	TGCAGCAAAGCATGGACATTGACGACTTCGGCATTGATTCTTTGCACAATGACAGCCACGAAATCGGTT	chr1L	1098197039	1	9.88e-28	Plus	37:C>T	0	0	0	-	0	0	0	0	0	0	0	0	0	0	0	0	0	0	-	0	0	0	0	0	0	0	0	0	0	0	0	0	0	0	0	0	0	0	-	0
D00239	32611037	TGCAGCAAAGGTCTCTTCTACCATATCCAAATTGGGACCATTGCTTTCTTCTTGTGTTTCATCCACTCT	TGCAGCAAAGGTCTCTTCTACCATATCCAAATTGGAACCATTGCTTTCTTCTTGTGTTTCATCCACTCT	chr2	1337222842	1	9.88e-28	Plus	35:G>A	0	0	0	0	0	0	-	0	0	0	0	0	0	0	0	0	0	0	-	0	0	0	0	0	0	2	0	0	0	0	0	0	0	0	0	0	0	0	0	-
D00257	39973026	TGCAGCACCAAATGCTAATAAAGTCGACACCCTGCATGCTTGGTATGTCATTTCTTCTAGTTCCTCTTG	TGCAGCACCAAATGCTAATAAAGTCGACACCCTGCACGCTTGGTATGTCATTTCTTCTAGTTCCTCTTG	chr5	108422504	1	9.88e-28	Minus	36:T>C	0	-	0	0	0	0	0	0	0	0	0	-	0	0	-	0	0	0	0	0	0	0	0	0	0	1	0	0	0	2	-	0	-	0	1	-	0	0	0	0
D00265	39979055	TGCAGCAGAACTCTCTACCATCCAAGACGAGTTGGCACTCTCCAAAACACAAGTATCGGAAGCTGAGCA	TGCAGCAGAACTCTCTACCATCCAAGACGAGTTGGCACTCTCCAAAACACAACTATCGGAAGCTGAGCA	chr6	553427372	1	9.88e-28	Minus	52:G>C	0	-	0	0	-	0	-	0	0	0	0	0	0	0	0	-	0	0	0	0	0	0	-	-	0	0	0	0	0	0	0	0	0	-	0	0	0	0	0	-
D00268	32608447	TGCAGCAGAGAGCATCACAGAAAGCCTACGCCGTACTCGTCAATTGATGGTTCAGGTTAGTGGTTAGGT	TGCAGCAGAGAGCATCACAGAAAGCCTACGCCGTACTCGTCAACCGATGGTTCAGGTTAGTGGTTAGGT	chr2	133293320	1	9.88e-28	Minus	43:T>C	0	0	0	0	0	0	0	0	2	-	0	2	0	0	0	0	0	0	-	0	0	2	-	0	-	0	0	0	0	0	0	-	-	0	0	0	0	0	0	0
D00275	39973081	TGCAGCAGCTGGAAGAAGTGGTTGTCATGCCCAACTACCACCGATTATTCCCTGGTGGTGCTAGAAAGT	TGCAGCAGCTGGAAGAAGTGTTTGTCATGCCCAACTACCACCGATTATTCCCTGGTGGTGCTAGAAAGT	chr3	1567894677	1	9.88e-28	Minus	20:G>T	0	0	0	0	0	0	-	0	0	0	0	0	0	-	0	0	0	0	-	0	0	0	0	0	0	-	0	0	0	0	0	0	0	0	0	0	0	0	0	0
D00288	39965186	TGCAGCATATTTACCCGTCATTTAGGAACTTGAAGAAATTGACAAAAGTGTAAATGAAAAAAGTACAAA	TGCAGCATATTTACCCGTCATTTAGGAACTTGAAGAAATTGACAAAAGTGTAAATGAAAAAAGTACAAC	chr1S	707243838	1	9.88e-28	Minus	68:A>C	0	0	0	0	0	0	0	0	0	0	0	0	0	0	0	-	0	0	0	0	0	0	0	0	0	0	0	0	0	0	0	-	0	0	0	-	0	-	0	0
D00311	39971997	TGCAGCCCAAAGTGATAAAAGAAGTGAGCATTCTATTCTACTAAAGTCAAAAACTGAAACCAATCTGAA	TGCAGCCCAAAGTGATAAAAGAAGTGAGCATTCTATTCTGCTAAAGTCAAAAACTGAAACCAATCTGAA	chr4	83147696	1	9.88e-28	Minus	39:A>G	0	0	0	0	0	0	0	0	0	0	0	0	0	-	-	0	0	0	0	0	0	0	0	0	0	0	-	-	0	0	0	-	-	0	0	0	0	-	0	0
D00312	39977484	TGCAGCCCAAGTATTTTCTTTATGTTTTGAATTTCTTCATTGTCCATTATCTGTTTGCTACTAGCTTCC	TGCAGCCCAAGTATTTTCTTTATGTTTTGAATTTCTTCATTGTCCATTATCTGTTTGCTATTAGCTTCC	chr6	778054584	1	9.88e-28	Plus	60:C>T	0	0	0	-	0	0	0	-	0	0	0	0	0	-	0	-	0	0	0	0	0	0	0	0	0	0	0	-	0	0	0	-	0	-	0	0	0	0	0	0
D00321	39977501	TGCAGCCTCAACATCACCCCCATTCCCATCCCCACCAAACACCTTCTTCGTCTTCACTCTCCCACCCGG	TGCAGCCTCAACATCACCCCCATTCCCATCCCCACCAAACACCTTCTTCGTCTTCACTCTCCCACCTGG	chr1S	1117312385	1	9.88e-28	Minus	66:C>T	0	0	2	-	0	0	2	2	0	0	0	0	0	0	0	0	0	1	0	0	0	0	-	0	0	-	0	0	0	0	0	0	0	0	0	-	0	0	0	0
D00324	39977509	TGCAGCCTCCTTCCATACTACACAAGTCCTGACTGCTTTTGCTTCTGAATTCCCACATCCCTAATGGAG	TGCAGCCTCCTTCCATACTACACAAGTCCTGACTGCTTTTGCTTCTGAATTCCTACATCCCTAATGGAG	chr5	531101095	1	9.88e-28	Plus	53:C>T	0	0	0	0	0	0	0	0	2	0	-	0	0	-	0	-	0	0	0	0	0	0	0	0	0	0	0	0	0	0	0	0	0	0	0	-	0	0	0	0
D00334	39965526	TGCAGCCTTTTTCTTCCTCCCCTACCTGAGCTGCTGCAACAGCACTCTACAAGTCTTTCACGTCATTAT	TGCAGCCTTTTTCTTCCTCCCCTACCTGAGCTGCTGCAACAGCACTCTACAAGTCTTTCACATCATTAT	chr3	1021036769	1	9.88e-28	Plus	61:G>A	0	0	-	0	0	0	0	0	0	0	0	0	0	0	0	0	0	0	0	-	0	0	0	-	0	0	0	0	0	0	0	0	0	-	0	0	0	0	0	0
D00340	39965567	TGCAGCGGAATGGATGAGAATGCTATTGGCACCTGTGCAGAACTTATATTTGCTCCAATTGATGCTTCA	TGCAGCAGAATGGATGAGAATGCTATTGGCACCTGTGCAGAACTTATATTTGCTCCAATTGATGCTTCA	chr4	419430579	1	9.88e-28	Minus	6:G>A	0	0	0	0	0	0	0	0	0	0	0	-	0	0	0	0	0	0	0	0	0	0	0	0	0	0	0	-	0	0	0	0	0	0	0	-	0	0	0	0
D00342	39965583	TGCAGCGGTCCTTGCTCAGAAACACAAATGTTTTATGTCAAACGCTTCGTACTTCCTGACTCCAAATCC	TGCAGCGGTCCTTGCTCAGAAACACAAATGTTTTGTGTCAAACGCTTCGTACTTCCTGACTCCAAATCC	chr5	114436574	1	9.88e-28	Minus	34:A>G	0	0	0	-	0	0	0	0	0	0	0	0	0	0	0	0	0	0	0	0	-	0	0	0	0	-	0	0	0	0	0	0	0	0	0	-	0	0	0	0
D00345	39973366	TGCAGCTAAAGATTATCCAAATGCTTGTCATAATGCATTCAAAAGGGTTCCTGATTTGGTTTACCCAAC	TGCAGCTAAAGATTATCCAAATGCTTGTCATAATGCATTCAAAAGGGTTCCCGATTTGGTTTACCCAAC	chr2	903308264	1	9.88e-28	Plus	51:T>C	0	-	0	0	0	0	0	0	0	0	0	0	0	-	0	-	0	0	0	0	0	0	-	-	0	0	0	0	0	0	0	0	0	0	-	0	0	0	0	0
D00351	39973407	TGCAGCTAGGCCGAAAAACCACTATCATGTTATAACCATCCCCAACAGAAATGCACATTATGAATCAGA	TGCAGCTAGGCCGAAAAACCACTATCATGTTATAACCATCCCTAACAGAAATGCACATTATGAATCAGA	chr2	663358138	1	9.88e-28	Minus	42:C>T	0	-	0	0	0	0	0	0	0	0	-	0	0	0	0	-	0	0	0	0	0	0	0	0	0	0	0	0	0	0	0	0	0	0	0	-	0	0	0	0
D00354	3520553	TGCAGCTATGTCTTCATTGATAACATGGGCACTCACTCTACTAGCTATGGGGTGAGCCTTATCAATTTT	TGCAGCTATGTCTTCATTGATAACATGGGCACTCACTCTATTAGCTATGGGGTGAGCCTTATCAATTTT	chr4	1289026978	1	9.88e-28	Minus	40:C>T	0	-	0	-	0	0	-	0	0	0	0	0	0	0	0	0	0	0	0	-	-	-	0	0	0	-	0	0	0	0	0	0	0	0	0	-	0	0	0	-
D00364	39973464	TGCAGCTCTAGATAAGGACGTTGATTCCTAAAAGCTAGTCCAGGAATCCGGCTAAACGAATGCGACATA	TGCAGCTCTAGATAAGGACGTTGGTTCCTAAAAGCTAGTCCAGGAATCCGGCTAAACGAATGCGACATA	chr1L	1358488116	1	9.88e-28	Minus	23:A>G	0	1	-	0	1	0	0	0	0	0	2	2	0	2	0	0	0	0	0	-	0	0	0	0	0	0	0	-	0	0	-	0	0	0	1	0	0	-	0	-
D00366	3518994	TGCAGCTGACAACATTTAGCTTGTCTAGTACAACCATAACTCATAGTTTTTTATAATATGTAATAAACA	TGCAGCTGACAATATTTAGCTTGTCTAGTACAACCATAACTCATAGTTTTTTATAATATGTAATAAACA	chr6	1385693102	1	9.88e-28	Plus	12:C>T	0	-	0	0	0	0	0	0	-	0	1	0	2	-	0	0	0	0	0	0	0	-	0	0	0	0	0	-	0	0	0	0	0	-	-	0	0	0	0	0
D00383	3522757	TGCAGCTGTAGACAAGATTCAAATCTCATTTCTCTAGTTTAGGAAAAGTTTGAGAATCATAAAAACGTA	TGCAGCTGTAGACAAGATTCAAATCTCATTTCTCTAGTTTAGGAAAAATTTGAGAATCATAAAAACGTA	chr1L	1673529676	1	9.88e-28	Minus	47:G>A	0	1	0	0	0	0	-	0	0	-	0	0	0	-	0	0	0	2	0	-	-	1	2	0	0	-	0	0	0	0	0	-	0	0	-	0	0	0	0	-
D00386	3512506	TGCAGCTTATATAAATAATTTGAAGCAGTTACAGGACTCCCTTCCTCCTCGACCATTGGAAGAGGTCTC	TGCAGCTTATATAAATAATTTGAAGCAGTTACAGGACTCCCTTCCTTCTCGACCATTGGAAGAGGTCTC	chr3	1371262688	1	9.88e-28	Plus	46:C>T	0	0	0	0	0	0	0	0	0	0	-	-	0	0	0	0	0	0	0	0	0	0	0	-	0	-	0	0	0	0	0	0	0	0	0	-	0	-	0	0
D00387	39973553	TGCAGCTTATGCCAAAGTAATGAAGAAGCTCGGTTTTTGTGGTTAGAACATTGTAAGTTGCTGCCAGTT	TGCAGCTTATGCCAAAGTAATGAAGAAGCTCGGTTTTTGTGGTTAGAACAGTGTAAGTTGCTGCCAGTT	chr1L	924586029	1	9.88e-28	Minus	50:T>G	0	0	0	0	0	0	0	0	0	0	-	-	0	0	2	0	0	0	-	0	-	0	0	0	0	-	0	0	0	0	0	0	0	0	0	-	0	0	0	0
D00410	3520439	TGCAGGAAATTCAAATGAACTTTTAGCATACAGCATAGTTTTCATTTACAGAAATAATCCATACAAATA	TGCAGGAAATTCAAATGAACTTTTAGCATACAGCATAGTTTTCATTTACAAAAATAATCCATACAAATA	chr3	30117787	1	9.88e-28	Minus	50:G>A	0	0	0	0	0	2	0	0	0	0	0	0	0	0	-	0	0	0	0	0	0	0	0	-	0	0	-	-	0	0	0	-	0	0	0	0	0	0	0	-
D00418	32608506	TGCAGGAAGATTATCTCTTCCAGCCCTTCCAGATTCCTGATAATAGCTTTCAATTGATTTTGACATTGT	TGCAGGAAGATTATCTCTTCCAGCCCTTCCAGATTCCTGATAATATCTTTCAATTGATTTTGACATTGT	contig_9538	19943	1	9.88e-28	Plus	45:G>T	0	0	0	0	0	0	0	0	0	0	-	0	0	-	0	0	0	0	0	0	0	0	0	0	0	0	0	0	0	0	0	0	0	2	-	0	0	0	0	0
D00424	13865097	TGCAGGAATGCCTTTACAAGTCGGAAGTTCTACCATTGGTGGAGCTTCCCACATGCCTATTCAACTGTA	TGCAGGAATGCCTTTACAAGTCGGAAGTTCTACCATTGGTGGAGCTTCCCACATGCCTATTCAACTGGA	chr5	697601847	1	9.88e-28	Minus	67:T>G	0	0	0	0	2	0	0	-	0	0	0	-	0	0	0	-	0	0	0	0	0	0	0	0	0	0	0	-	1	0	2	0	-	-	-	0	0	-	0	0
D00436	3522430	TGCAGGAGCAACAAAGAGGCCTACTTGTTGTGTTTTAGTGATGACCAAACCTTCAAAGGGTGAACTTGC	TGCAGGAGCAACAAAGAGGCCTACTTGTTGTGTTTTAGTAATGACCAAACCTTCAAAGGGTGAACTTGC	contig_5040	71672	1	9.88e-28	Plus	39:G>A	0	0	0	0	0	0	0	0	-	0	0	0	0	0	0	0	0	0	0	0	0	0	0	0	0	0	0	0	0	0	0	0	0	0	0	-	0	0	0	0
D00439	18318883	TGCAGGAGGAGACATGGGATATTGAGGAGGGAGGTCAGAGTAGTGTCTTATCCAGTAGCATGCAGGTGA	TGCAGGAGGAGACATGGGATATCGAGGAGGGAGGTCAGAGTAGTGTCTTATCCAGTAGCATGCAGGTGA	chr1L	1541940800	1	9.88e-28	Minus	22:T>C	0	2	0	-	0	0	2	0	-	0	0	-	0	0	0	0	0	0	-	0	-	0	0	0	0	0	0	0	0	0	0	0	0	0	0	0	0	0	0	0
D00441	3524151	TGCAGGAGTGAAAGAACGGAATGTGAATGGGACTGGAAATCCGGAGGACAATATTGAAGGGATTGGTTT	TGCAGGAGTGAAAGAACGGAATGTGAATGGGAATGGAAATCCGGAGGACAATATTGAAGGGATTGGTTT	chr1L	1758048310	1	9.88e-28	Minus	32:C>A	0	0	0	0	0	0	-	-	0	-	0	-	0	-	0	-	-	0	-	0	0	0	0	0	0	0	0	-	0	0	0	0	0	0	-	0	0	0	0	2
D00451	39973776	TGCAGGATGCTTCTTATGTACCAATATGGAGCAAGATCCGTGAAATGTGCAGTTTGCAATTTTGTTACC	TGCAGGATGCTTCTTATGTACCAATACGGAGCAAGATCCGTGAAATGTGCAGTTTGCAATTTTGTTACC	chr4	914279415	1	9.88e-28	Minus	26:T>C	0	0	0	-	0	0	0	0	0	0	0	0	0	0	-	0	0	0	-	0	0	0	-	0	0	0	0	-	0	0	-	0	0	-	0	0	0	0	0	0
D00465	39980112	TGCAGGCATGCATAAAAAGGATCGATGGTGATGATTCTGGGCAGAAACACTGCACTGGACAATATTTTG	TGCAGGCATGTATAAAAAGGATCGATGGTGATGATTCTGGGCAGAAACACTGCACTGGACAATATTTTG	chr1L	1772859560	1	9.88e-28	Plus	10:C>T	0	-	-	0	0	0	0	0	-	0	0	0	0	0	-	-	0	0	-	0	0	0	0	0	0	0	0	0	0	0	0	0	0	-	0	0	0	-	0	0
D00485	3530768	TGCAGGGATATCAAGGCAAATTTTGATAATGGTTTTTGGCTTGGCACAAGGAGGATTCCAACATGGTGA	TGCAGGAATATCAAGGCAAATTTTGATAATGGTTTTTGGCTTGGCACAAGGAGGATTCCAACATGGTGA	chr6	203537871	1	9.88e-28	Minus	6:G>A	0	0	0	0	0	0	0	0	-	0	0	0	0	0	-	0	0	0	-	-	0	0	-	0	0	0	0	-	0	0	0	0	0	-	-	0	0	0	0	0
D00496	3519361	TGCAGGGTGCTGCTGTAAGCTTTCCATAACCGAAAATCGTGACGGAATAAGTCAAACAGAACCTGTAAA	TGCAGGGTGCTGCTGTAAGCTTTCCATAACCGAAAATCGTGACGGAATAAGTCAAACAGAACCTGCAAA	chr5	435899046	1	9.88e-28	Minus	65:T>C	0	0	-	-	0	0	0	0	0	0	-	0	-	0	0	0	0	0	0	0	-	0	0	2	0	0	-	-	0	0	0	0	0	0	-	0	0	0	0	0
D00500	32609611	TGCAGGGTTTGTATTGCAGTGGCGGCTTGCCCTTGTTCTCGTTGCTGTCTTCCCGGTTGTTGTCGCAGC	TGCAGGGTTTGTATTGCAGTGGCGGCTTGCCCTTGTTCTCGTTGCTGTCTTCCCAGTTGTTGTCGCAGC	chr3	254851649	1	9.88e-28	Minus	54:G>A	0	0	-	0	0	0	0	0	0	0	0	0	0	-	0	0	0	0	0	0	0	0	0	0	0	0	0	0	0	0	0	0	0	0	0	0	0	0	-	0
D00503	39973996	TGCAGGTAATTGACCATATCAGCAAAATTTCAACTAATAGAAAATGCAGTTTCTTATCAGCTGCCTGTG	TGCAGGTAATTGACCATATCAGCAAAATTTCAACTAATAGAAAATGCAGTTTCTTATCAGCTGTCTGTG	contig_8181	88842	1	9.88e-28	Minus	63:C>T	0	0	0	-	0	0	0	0	-	-	-	0	0	0	0	-	0	0	0	0	0	-	0	0	0	0	-	-	0	0	0	0	0	0	0	0	0	-	-	0
D00506	39966616	TGCAGGTACTGCTGAATCTCTTTTGGTACTGTTATAAGATATATATTTGATAGATCAAAAAATAAACCG	TGCAGGTACTGCTGAATCTCTTTTGGTACTGTTATAAGATATATATTTGATAGATCAAAAAATAGACCG	chr1S	1131594659	1	9.88e-28	Plus	64:A>G	0	0	0	-	0	0	0	-	0	0	0	-	0	0	-	0	0	0	0	0	-	-	0	0	0	0	-	0	0	0	0	0	-	0	0	0	0	0	0	-
D00509	3521893	TGCAGGTATCATAAGCTTCCCGTCTTCTATTTAGAAGTGTATTTGGAGACATCATCTCTCAACATGTCT	TGCAGGTATCATAAGCTTCCCGTCTTCTATTTAGAAGTGTTTTTGGAGACATCATCTCTCAACATGTCT	chr4	867768071	1	9.88e-28	Plus	40:A>T	0	0	0	0	0	0	0	0	0	0	0	0	2	0	-	0	0	0	-	0	0	0	0	0	0	-	0	0	0	0	0	0	0	0	0	0	0	0	0	2
D00519	3518485	TGCAGGTGAAGTCTCTCAAGCAGAATTGAATCAATCTTCAACACAGTAAGTGAAATATGAAACCTCCAA	TGCAGGTGAAGTCTCTCAAGCAGAATTGAATCAATCTTCAACACAGTAAGTGAAATATGAAACCTCTAA	chr1L	1034386669	1	9.88e-28	Minus	66:C>T	0	0	-	0	0	0	-	0	2	0	0	1	0	-	0	0	0	0	0	0	0	-	0	0	-	0	0	-	0	0	0	-	0	0	0	0	0	0	0	0
D00526	3518714	TGCAGGTGCTTTTAGACTGTTTATGATGTTTCTGAAAAACTAAATAATGCTTTCTTTTACAGAATTTCA	TGCAGGTGCTTTTAGACTATTTATGATGTTTCTGAAAAACTAAATAATGCTTTCTTTTACAGAATTTCA	chr5	1108162723	1	9.88e-28	Minus	18:G>A	0	0	0	0	0	0	0	0	1	0	0	0	0	0	0	0	0	2	0	0	-	0	0	0	0	0	0	0	0	0	0	0	0	-	-	1	0	0	0	0
D00531	39974092	TGCAGGTGTGTTCGTGTGTGTTGCAAAATAGGGCCCTGAATAATTCAACCAAAGGCAATAAATAAAATA	TGCAGGTGTGTTCGTGTGTGTTGCAAAATAGGGCCCTGAATAATTCAACCAAAGGCAATAAATAAAATT	contig_7543	44757	1	9.88e-28	Minus	68:A>T	0	0	0	-	0	0	0	0	0	0	0	0	0	-	0	-	0	0	0	0	0	0	0	0	0	0	0	1	0	0	0	0	0	0	0	-	0	0	0	0
D00533	13865211	TGCAGGTTACTCATAGTATTTCTATTCAGAGACTGACTCAACGCTGAAAGATTGGCTGAGCTGGGGTGC	TGCAGGTTACTCATAGTATTTCTATTGAGAGACTGACTCAACGCTGAAAGATTGGCTGAGCTGGGGTGC	chr4	348385396	1	9.88e-28	Plus	26:C>G	0	0	0	-	0	0	0	0	0	-	-	0	0	0	0	-	0	0	0	0	0	0	-	0	0	0	0	-	0	0	0	-	0	0	0	0	0	0	0	-
D00537	39974120	TGCAGGTTGCATGCTACTTCCATGCCAAGTACAGGTCAACCAAATCAAATACTTATAAGAAAAATGGTT	TGCAGGTTGCGTGCTACTTCCATGCCAAGTACAGGTCAACCAAATCAAATACTTATAAGAAAAATGGTT	chr4	1644961365	1	9.88e-28	Plus	10:A>G	0	0	0	0	0	0	0	0	0	0	-	0	0	-	0	0	0	0	0	-	0	0	0	0	0	-	-	0	0	0	0	0	0	0	0	0	0	2	0	-
D00538	39963130	TGCAGGTTGCCATTTGTAGGAACTAGGAAGAAGCATATTCAAAGACAACTAAAATTGGGTGATGGAATG	TGCAGGTTGCCATTTGTAGGAACTAGGAAGAAGCATATTCAAAGACAACTAAAATTGGGTGATGAATGG	chr3	460472012	1	9.88e-28	Minus	64:G>A	0	0	0	0	0	0	0	0	0	0	0	0	0	0	0	0	0	0	0	0	0	0	0	0	0	0	0	0	0	-	0	0	0	0	-	0	0	0	0	-
D00551	13865230	TGCAGTAAATCCCGAAAGAGCAACAACGATGAGGCAAAGTACACCTTCTCGCTTAGCTGAAGGCGATAC	TGCAGTAAATCCCGAAAGAGCAACAACGATGAGGCAAAGTACACCTTCTCGCTTAGCAGAAGGCGATAC	chr1S	35494592	1	9.88e-28	Minus	57:T>A	0	0	0	2	0	0	2	0	0	2	0	0	0	1	-	0	2	0	0	-	0	0	1	-	2	0	0	1	1	0	0	0	1	0	0	-	1	0	0	0
D00559	39966975	TGCAGTAATTGCTCCAGTGCTGGTGGTGGTCGAAGACTGCTCCTGGAAAAACAATAAATGGTTACCATC	TGCAGTAATTGCTCCAGTGCTGGTAGTGGTCGAAGACTGCTCCTGGAAAAACAATAAATGGTTACCATC	chr1L	916768692	1	9.88e-28	Minus	24:G>A	0	0	0	-	0	0	0	0	0	-	0	0	0	0	0	0	0	0	0	0	0	0	0	0	0	0	0	0	0	0	0	0	0	0	0	0	0	0	-	0
D00565	39967026	TGCAGTACTCATAGATCAGAAGCCTTTGTCCATGCTCTGAACAGTATCCAATAAGCTCAACAATATTTG	TGCAGTACTCATAGATCAGAAGCCTTTGTCCATGCTCTGAACAGTATCCAATAAGTTCAACAATATTTG	chr6	65351055	1	9.88e-28	Minus	55:C>T	2	0	0	0	0	0	0	0	0	0	-	0	0	0	0	0	0	0	0	0	0	0	0	-	0	-	0	0	0	0	0	0	-	0	0	0	0	0	0	0
D00571	39974283	TGCAGTAGGCAGTGTGGAAGTTGCTGCTCCTGACATTGACTGGGATATTTCAGTGGAAAGTTCACAAAT	TGCAGTAGGCAGTGTGGAAGTTGCTGCTCCTGACATTGACTGGGATATTTCGGTGGAAAGTTCACAAAT	chr3	155611670	1	9.88e-28	Minus	51:A>G	0	0	0	0	0	0	0	-	0	0	-	0	0	0	0	0	0	0	0	0	0	0	-	0	0	0	0	-	0	0	0	0	-	0	0	0	0	0	0	0
D00574	39967111	TGCAGTATAATCTCCATAAATCCTCTAAAGCTTCCATTGATTACCGATGTTTCTATCCGAGGAGATCCG	TGCAGTATAATCTCCATAAATCCTCTAAAGCTTCCATTGATTACCGATGTTTCTATCCGTGGAGATCCG	chr4	986452804	1	9.88e-28	Minus	59:A>T	0	0	0	0	0	0	0	0	-	0	0	0	0	0	0	0	0	0	0	0	0	0	0	-	0	0	0	-	0	0	0	-	-	-	0	0	0	0	0	-
D00578	13904907	TGCAGTATGCAAATATATATACAAAGAGGCACATAATTGACATAATCGACAACAATTATGAGACAATTA	TGCAGTATGCAAATATATATACAGAGAGGCACATAATTGACATAATCGACAACAATTATGAGACAATTA	chr5	12686139	1	9.88e-28	Minus	23:A>G	0	-	0	0	0	0	0	0	0	-	0	-	0	2	-	0	0	0	0	0	0	0	0	0	0	-	0	0	0	0	0	0	0	-	0	0	0	0	0	0
D00590	3519177	TGCAGTCAGTTCACTATAACCCAATGATAGTATCTTCTTGTCAATTTCCTGCATGATGAAATGATATAG	TGCAGTCAATTCACTATAACCCAATGATAGTATCTTCTTGTCAATTTCCTGCATGATGAAATGATATAG	chr5	246616853	1	9.88e-28	Minus	8:G>A	0	0	0	-	2	0	0	0	-	0	-	0	0	-	0	0	0	0	0	0	0	-	0	0	0	0	0	-	0	0	0	1	-	0	1	0	0	0	0	-
D00595	32610539	TGCAGTCCAATGGTTTGACTGGTAGGTTACCTCCAGAGCTTGCAAATTTGAAATACCTTCAAGAACTTC	TGCAGTCCAATGGTTTGACGGGTAGGTTACCTCCAGAGCTTGCAAATTTGAAATACCTTCAAGAACTTC	chr6	1307709474	1	9.88e-28	Minus	19:T>G	0	0	0	-	0	0	0	-	0	1	0	0	0	0	0	0	0	2	-	-	-	2	0	0	0	0	0	-	0	1	2	0	-	-	0	0	2	0	0	0
D00610	39974471	TGCAGTGAAGTTCGTATTGAGGGATTGGAGACACTTGATTATTTTGATAATCTGGTGAACAGATCAAGG	TGCAGTGAAGTTCGTATTGAGGGATTGAAGACACTTGATTATTTTGATAATCTGGTGAACAGATCAAGG	chr1S	1015322058	1	9.88e-28	Plus	27:G>A	0	-	0	-	0	0	0	0	0	-	0	0	0	0	0	0	0	0	0	0	-	0	2	0	0	0	0	0	0	0	0	0	0	0	0	-	0	0	-	0
D00612	39967422	TGCAGTGAATCCCAGGAGAAAAGCTCTTGCTCTATACCCAGTTTTTCTCATGTATGTATCTGTTGGTTT	TGCAGTGAATCCCAGGAAAAAAGCTCTTGCTCTATACCCAGTTTTTCTCATGTATGTATCTGTTGGTTT	chr4	1492475816	1	9.88e-28	Minus	17:G>A	0	0	0	-	0	0	0	0	0	0	-	0	0	-	0	0	0	0	-	0	0	0	0	0	0	0	0	0	0	0	0	0	0	0	0	-	0	-	0	0
D00624	39977969	TGCAGTGCAAATCATGCCACGGTTGTCTAGGAGCCCTTGTTCCAGACTATCACAAAAATCAAACAAAAA	TGCAGTGCAAATCATACCACGGTTGTCTAGGAGCCCTTGTTCCAGACTATCACAAAAATCAAACAAAAA	chr1L	993827281	1	9.88e-28	Plus	15:G>A	0	0	-	0	0	0	0	0	0	0	-	0	0	0	0	0	0	0	0	0	-	0	0	0	0	0	0	0	0	0	0	-	0	0	0	0	0	-	0	0
D00625	13865326	TGCAGTGCATAGGTGCAATGCAACTATAGATTTCCTTGATGAAGTGAGACCTAACTATCCTCCAACTGT	TGCAGTGCATAGGTGCAATGCAACTATAGATTTCCTTGATGAAGTGAGACCTTACTATCCTCCAACTGT	chr4	411194865	1	9.88e-28	Plus	52:A>T	0	-	0	0	0	0	0	0	0	-	0	0	0	-	-	-	0	0	0	0	0	0	0	0	0	0	-	0	0	0	0	0	-	-	0	0	0	0	0	0
D00628	39974519	TGCAGTGCCTCCTATCGCTGTTTCCACTCCGCCTCATGCTTTTCCTCCGTCTTCAATTGCTTCTAATCT	TGCAGTGCCTCCTATCGCTGTTTCCACTCCGCCTCATGCTTTTCCTCCGTCTTCAATTGCTTCTAATTT	chr4	218558576	1	9.88e-28	Plus	67:C>T	0	0	0	0	0	0	0	0	0	0	0	0	-	-	0	0	0	0	0	0	0	0	0	0	0	0	-	0	0	0	0	0	0	0	0	0	0	0	0	-
D00634	3523529	TGCAGTGGATCTTTCTGAAGTCACCGGGAAAGAACAAGTGGATGCACAACCAATTAGAAAAGGAAGAGG	TGCAGTGGATCTTTCTGAAGTCACCGGGAAAGAACAAGTGGATGCACAACCAGTTAGAAAAGGAAGAGG	chr3	384077160	1	9.88e-28	Minus	52:A>G	0	0	0	0	0	0	0	0	0	0	-	0	0	0	0	0	0	0	0	0	0	0	0	0	0	0	0	-	0	0	-	0	0	0	-	0	0	-	-	-
D00640	32609689	TGCAGTGGTCTCAACCTTATGCAAATAACGCAACCATCATTGGCCCAACCACTAAGAGGGTAGAGATTT	TGCAGTGGTCTCAACCTTATGCAAATAACGCAACCATCATTGGCCCAACCACTTAGAGGGTAGAGATTT	chr4	1313936672	1	9.88e-28	Minus	53:A>T	0	0	0	0	0	0	0	0	0	-	0	0	0	0	0	0	0	0	0	0	0	-	-	0	0	0	-	0	0	0	0	0	0	-	-	-	0	0	0	-
D00641	39967603	TGCAGTGTATCTATGAAAAAGAAAAAGACATGATGTAACATGTTCAAATAATGTCAAGAATTGTAAGAA	TGCAGTGTATCTATGAAAAAGAAAAAGACACGATGTAACATGTTCAAATAATGTCAAGAATTGTAAGAA	chr3	1376003226	1	9.88e-28	Minus	30:T>C	0	0	0	0	0	0	0	0	-	0	0	0	0	-	-	0	0	0	0	0	0	-	0	0	-	0	0	0	0	0	0	-	0	-	0	0	0	-	0	0
D00647	3520130	TGCAGTGTTTTGCAGCAGAAAGGTTACATTTCGCAATAAGTAGGCCAAGATCTTTGGACTATTTGGGTT	TGCAGTGTTTTGCAGCAGAAAGGTTACATTTCGCAATAAGTAGGCCAAGATCATTGGACTATTTGGGTT	chr6	311934219	1	9.88e-28	Minus	52:T>A	0	0	0	0	0	0	-	0	0	0	-	1	0	0	0	-	0	0	0	0	0	1	0	-	0	-	0	0	0	0	0	0	0	-	0	-	0	-	0	0
D00658	32609703	TGCAGTTCAAGAAAATTATAATACTCAACTGAGTTATAAGCATAGGATTTTTTTGTTCTTGAATGGTGT	TGCAGTTCAAGAAAATTATAATACTCAACTGAGTTATAAGCATATGATTTTTTTGTTCTTGAATGGTGT	chr3	1189190072	1	9.88e-28	Minus	44:G>T	0	0	0	0	0	0	0	0	0	0	0	0	0	-	2	1	0	0	0	-	0	0	0	0	0	0	0	-	0	0	0	0	1	0	0	0	0	0	0	0
D00668	39974676	TGCAGTTCTCAGATGCATCACATCAAACAGCTTCCGATGAAAACCAAATCCTCCACCTTACTACCTTAG	TGCAGTTCTCAGATGCATCACATCAAACAGCTTCCGATGAAAACCAAATCCTCCACCTTACTACCATAG	chr5	93428922	1	9.88e-28	Minus	65:T>A	0	0	0	0	0	0	0	-	-	0	0	0	0	0	0	0	0	0	-	0	0	0	-	-	0	0	0	0	0	0	-	0	0	-	-	-	0	0	-	0
D00669	3513487	TGCAGTTCTTTACGGTTCTAATACTATATACTACACCGTCTTCTTTGTTTGCCGATTTCCCTATTTATT	TGCAGTTCTTTACGGTTCTAATACTATATACTACACCGTCTTCTTTGTTTGCTGATTTCCCTATTTATT	chr3	111181600	1	9.88e-28	Minus	52:C>T	0	-	0	0	0	0	0	0	0	0	0	0	-	0	0	0	0	0	0	0	0	0	0	-	-	0	0	0	0	0	0	-	-	-	0	0	0	-	0	-
D00670	3520194	TGCAGTTGAAAAAAAAGCACATCGACCATGGAAGATAATATTTTATTAGAGGTTGAGAGAGGGAGGGAA	TGCAGTTGAAAAAAAAGCACATCGACCATGGAAGATAATATTTTATTAGAGGTTGACAGAGGGAGGGAA	chr4	11504833	1	9.88e-28	Minus	56:G>C	0	0	0	0	0	0	0	0	0	2	-	0	0	0	-	0	2	0	-	0	-	0	-	0	0	0	0	0	0	0	0	0	0	1	0	0	0	0	0	1
D00675	39974712	TGCAGTTGATTCCAAACCTTTTACAGATTCACAGGTATGTTTCACAACTTTTCTTGGATCTTTCACTCA	TGCAGTTGATTCCAAACCTTTTACAGATTCACAGGTATGTTTCACAACTTTACTTGGATCTTTCACTGA	chr5	810211922	1	9.88e-28	Plus	51:T>A	0	0	0	0	0	0	0	-	0	0	0	0	0	0	0	0	0	0	-	0	0	0	0	0	0	0	0	0	0	0	0	0	0	0	0	0	0	0	0	-
D00681	32608644	TGCAGTTGCTTCTTACCGACAACTCCTCTACCCCTATTGCCATTCACAACCGGCCAAAATGGCTGCAAA	TGCAGTTGCTTCTTACCCACAACTCCTCTACCCCTATTGCCATTCACAACCGGCCAAAATGGCTGCAAA	chr4	1069877151	1	9.88e-28	Plus	17:G>C	0	-	-	0	0	0	0	0	0	0	0	0	0	0	0	1	0	0	0	0	0	0	0	0	0	-	0	0	0	0	0	-	0	0	0	0	0	-	0	1
D00683	3514262	TGCAGTTGGAATGAAACAATTGTTTGTTGTTATGATTGAAAATGCAGAAAATTGGGTGCGGTCACAGTG	TGCAGTTAGAATGAAACAATTGTTTGTTGTTATGATTGAAAATGCAGAAAATTGGATGCGGTCACAGTG	chr4	592218038	1	9.88e-28	Plus	7:G>A	0	0	-	0	0	0	0	0	-	0	0	0	0	0	0	0	0	0	0	0	0	0	0	0	0	-	0	0	0	0	0	0	-	-	-	-	0	0	0	-
D00708	39968103	TGCAGTTTTGGACGGAGTGCTTCAAGTGGTCCTTTAGGCTTTTGTGCTCCTTGCTATATCAGTAATCAT	TGCAGTTTTGGACTGAGTGCTTCAAGTGGTCCTTTAGGCTTTTGTGCTCCTTGCTATATCAGTAATCAT	chr1L	824661299	1	9.88e-28	Plus	13:G>T	0	0	-	0	0	0	0	0	0	0	0	0	0	0	0	0	0	0	0	0	0	0	0	0	0	0	0	-	0	0	0	0	0	-	0	0	0	0	0	0
D00718	13904261	TGCAGAAAATCAACAATGAATTAGAGGCAAAACCTAAAAGAAAATTGTCAAAATGACCTAAAAAAATGT	TGCAGAAAATCAACAATGAATTAGAGGCAAAACCTAAAAGAAAATTGTCAGAATGACCTAAAAAAATGT	chr6	491757085	1	9.88e-28	Plus	50:A>G	0	0	0	0	0	0	0	0	0	0	-	0	0	0	-	0	0	-	0	-	0	0	0	-	0	0	0	0	0	0	0	0	-	0	0	0	0	0	0	0
D00756	39972457	TGCAGACCTCTGTTAGCAATAGCAGTTGCTGTGGCTGCTAATTGCTGCCTGAAAATGCCATTGCATTTG	TGCAGACCTCTGTTAGCAATAGCAGTTGTTGTGGCTGCTAATTGCTGCCTGAAAATGCCATTGCATTTG	chr1S	724398261	1	9.88e-28	Minus	28:C>T	1	0	0	0	0	0	-	0	-	-	-	0	0	0	-	-	0	0	-	-	0	0	0	0	0	0	0	-	0	0	0	0	-	0	0	0	0	-	0	-
D00771	39979749	TGCAGAGGTTAGCACAGCATCAACCAACTCAACATCCAACGTCGGAGGAATTGAGTATTGGGAAGATAA	TGCAGAGGTTAGCACAGCATCAACCAACTCAACATCCAACGTCGGAGGAATTGAGTATTGGGAAGATGA	chr4	1344099429	1	9.88e-28	Minus	67:A>G	0	0	0	0	0	0	0	0	0	0	0	0	0	0	-	0	0	-	-	0	0	0	0	0	0	0	0	0	0	0	0	0	0	0	0	0	0	0	0	0
D00779	13890628	TGCAGATCACTGGACTAGTAAGAATGCCTAGCAAAAGACGTCCAGATTTTGTACAGAGAATAGCATTTG	TGCAGGTCACTGGACTAGTAAGAATGCCTAGCAAAAGACGTCCAGATTTTGTACAGAGAATAGCATTTG	chr2	478828530	1	4.6e-26	Minus	5:A>G	0	0	0	0	0	0	0	0	0	0	0	0	0	0	-	0	0	0	0	0	0	-	-	0	0	0	0	0	0	0	0	0	0	0	0	-	0	0	0	1
D00793	22856640	TGCAGATTATTGAAGCATGCCTTGTCTCTCTTCTAACATCAGTTATTTCATTTGGCTTGCCGCTTCTAA	TGCAGATTATTGAAGCATGCCTTGTCTCTCTTCTAACATCAGTTATTTCATTTGGCTTGCCGCTACTAA	chr1L	1263692609	1	9.88e-28	Minus	64:T>A	0	-	0	0	0	-	0	0	0	-	0	0	0	-	0	-	0	0	-	-	-	0	-	0	0	0	0	0	0	0	-	0	0	0	0	-	0	0	0	0
D00801	39972992	TGCAGCAATAGTTGGGGATACAACTACAGGATTGATCAACCTGAAACAAAACTCATGAAACGGGAGGGT	TGCAGCAATAGTTGGGGATACAACTACAGGATTGATCAACCTGAAACAAAACTCATGAAACGGGAAGGT	chr6	163297295	1	9.88e-28	Minus	65:G>A	0	0	0	-	0	0	0	-	0	0	0	0	0	0	0	0	0	2	0	0	0	0	0	-	0	0	0	1	0	0	0	-	0	0	0	-	0	0	0	-
D00831	13864998	TGCAGCCTTTTTTCCTGCCATAACAGGCCCACGCGATCTTCGCTTTGAAGAACATATATCATCCCTTGA	TGCAGCCTTTTTTCCTGCCATAACAGGCCCACGCGATCTTCGCTTTGAAGAACATATATCATCTCTTGA	chr1L	1441122610	1	9.88e-28	Plus	63:C>T	0	-	0	0	0	0	0	1	0	-	0	0	0	-	-	0	0	0	0	-	0	0	0	0	0	0	0	0	1	2	0	-	2	0	0	-	0	0	2	-
D00840	39965761	TGCAGCTCTGCGATGCTATCAAATATAAACACCATAAAACTCATAGGCTAGTATTGGTTTTAGGACCCC	TGCAGCTCTGCGATGCTATCAAATATAAACACCATAAAACTCATAGGCTAGTATTTGTTTTAGGACCCC	chr3	220931520	1	9.88e-28	Plus	55:G>T	0	0	0	0	0	0	-	0	0	0	0	0	0	-	0	0	0	0	0	0	0	0	0	0	0	0	0	0	0	0	0	0	0	0	-	0	0	0	0	-
D00844	18318865	TGCAGCTGCCATTGATGCTGAGGCTTCTTCAAGGGTCCTCCTCTTCTCAATTGTGTCGAAGGCTTCAAG	TGCAGCTGCCATTGATGCTGAGGCTTCTTCAAGGGTCCTCCTCTTCTCAATTGTGTCAAAGGCTTCAAG	chr1S	1438047976	1	9.88e-28	Minus	57:G>A	0	2	0	0	0	0	0	0	0	0	0	0	0	-	0	0	0	0	-	0	0	0	-	0	0	0	0	0	0	0	-	0	0	-	0	-	2	-	0	0
D00848	39965884	TGCAGCTTCATCGTTTGGAACAATACCGAATTCGCTCGCCTTCTCCTCCCAACCTATTTCAAGCACAGC	TGCAGCTTCATCGTTTGGAACAATACCGAATTCGCCCGCCTTCTCCTCCCAACCTATTTCAAGCACAGC	chr6	1047378629	1	9.88e-28	Plus	35:T>C	0	0	0	0	0	0	0	0	0	0	0	0	0	0	-	0	0	0	-	0	-	0	0	0	0	-	0	-	0	1	0	-	0	0	0	0	0	0	0	0
D00861	39973778	TGCAGGATGGACATTTCACTGTTCTAGTATGTTCATGTACTCTTTTCAAATAATAATTTAGTCTTGTTT	TGCAGGATGGACATTTCACTGTTCTAGTATGTTCATGTACTGTTTTCAAATAATAATTTAGTCTTGTTT	chr5	820353268	1	9.88e-28	Minus	41:C>G	0	-	0	0	0	-	0	-	0	0	0	0	0	-	0	-	0	0	-	0	0	0	0	0	0	0	0	0	0	0	0	0	0	0	0	-	0	0	0	0
D00906	39967288	TGCAGTCCAATTTGTTCTTGCAGTCAGAATTATTAGTGTGACAGTCTGTATAAAAACTCCAAGGATCAT	TGCAGTCCAATTTGTTCTTGCAGTCAGAATTGTTAGTGTGACAGTCTGTATAAAAACTCCAAGGATCAT	chr1L	483390620	1	9.88e-28	Minus	31:A>G	0	0	-	0	0	0	0	0	0	0	0	0	0	0	0	0	0	0	0	0	0	0	0	-	0	0	0	0	0	0	0	0	-	-	0	-	0	0	0	0
D00922	39979284	TGCAGTGCCTAATTGTGAAACACCTGGGTATTAGTTGGAAGAAAATGCATGAAAAAATATTAGTAAGAG	TGCAGTGCCTAATTGTGAAACACCTGGGTATTAGTTGGAAGAAAATGCATGACAAAATATTAGTAAGAG	chr4	368548019	1	9.88e-28	Plus	52:A>C	0	0	0	0	0	0	0	0	0	0	0	0	0	0	-	-	0	0	0	0	0	0	0	0	-	0	0	0	0	0	-	0	0	0	0	0	0	0	0	0
D00923	39967519	TGCAGTGCTCGCAATCGCCGTGAACCTCGTTATCACCGCCGTCAAACACCACAAAGACAAAAATGCAAA	TGCAGTGCTCGCAATCGCCGTGAACCTCGTTATCACCGCCGTCAAACACCACAAAGACAAAAATGTAAA	chr2	654521377	1	9.88e-28	Plus	65:C>T	0	-	-	-	-	0	0	-	0	0	0	0	0	0	0	0	0	0	0	0	0	0	0	-	0	0	0	0	0	0	-	0	0	-	0	0	0	0	0	0
D00959	39972523	TGCAGAGAGACCTCTATGGAGATCGAGATGTTCGTCCAGTTGAGCACTATCTTGATGCTTCCATTATTA	TGCAGAGAGACCTCTATGGAGATCGAGATGTTCGTCCAGTTGAGCACTATCTTGATGCTTCCATCATTA	chr2	1131072892	1	9.88e-28	Minus	64:T>C	0	0	0	0	0	0	0	-	0	0	0	0	0	0	0	0	0	0	0	0	0	-	-	-	0	0	0	0	0	0	0	0	0	0	0	-	0	-	0	0
D00981	39971944	TGCAGCAGCTACAGCTACAGGTGATGTTTACATGTGGGATGGGAAGAAAGGTAAGGATAAGCCGCTTGT	TGCAGCAGCTCCAGCTACAGGTGATGTTTACATGTGGGATGGGAAGAAAGGTAAGGATAAGCCGCTTGT	chr5	624907591	1	9.88e-28	Minus	10:A>C	0	0	0	0	0	0	0	0	-	0	-	0	0	-	0	0	0	0	0	0	0	0	-	-	0	-	2	-	0	0	-	0	0	0	0	-	0	-	0	-
D01164	39968203	TGCAGAAACATCCTAGTAGGTGTACTAAATTACAGATCGGAAGAGCGGTTCAGCAGGAATGCCGAGACC	TGCAGAAACATCCTATTAGGTGTACTAAATTACAGATCGGAAGAGCGGTTCAGCAGGAATGCCGAGACC	chr1L	1430262364	1	6.24e-08	Plus	15:G>T	0	0	0	0	0	0	0	0	0	0	-	0	0	0	0	-	0	-	0	0	0	0	0	0	0	0	-	0	0	0	0	0	0	0	0	-	0	0	0	-
D01171	39968273	TGCAGAACAGAGGTTGACTAATAAACAGAGAGCTGAACTTCAGAAATTTACAGATCGGAAGAGCGGTTC	TGCAGAACAGAGGTTGACTAATAAACAGTGAGCTGAACTTCAGAAATTTACAGATCGGAAGAGCGGTTC	chr3	854274333	1	2.11e-17	Minus	28:A>T	0	0	-	0	0	0	0	-	-	0	0	0	0	-	0	0	0	0	0	-	0	0	0	0	0	0	0	-	0	0	0	0	0	-	0	0	0	0	0	0
D01172	39975270	TGCAGAACATTTGTCAGTGTCTTCCAGTAGCGTCTCCCGTGAAGAACATCATCAGATTACAGATCGGAA	TGCAGAACATTTGTCAGTGTCTTCCAGTAGCGTCTCCCGTGAAGAACAGCATCAGATTACAGATCGGAA	chr5	1337991485	1	2.79e-22	Minus	48:T>G	0	0	0	0	0	0	0	0	0	0	0	0	0	0	0	0	0	0	-	0	-	0	-	0	0	-	-	-	0	0	0	0	0	0	0	0	0	0	0	0
D01183	3514888	TGCAGAAGACACGGCAATCTTCTGGCTAGCAGATTTTACAGATCGGAAGAGCGGTTCAGCAGGAATGCC	TGCAGAAGACACGGCATTCTTCTGGCTAGCAGATTTTACAGATCGGAAGAGCGGTTCAGCAGGAATGCC	chr5	789210790	1	6.39e-10	Minus	16:A>T	0	0	0	0	0	0	0	0	-	0	0	0	0	0	0	0	0	0	-	-	-	-	0	-	0	0	0	0	0	0	0	0	0	0	0	0	0	0	0	-
D01201	39978295	TGCAGACAAATCCCTCCAATTATAATTCATAACTAGGCCAGAATATATATTACAGATCGGAAGAGCGGT	TGCAGACAAATCCCTCCAATTATAATTCATAACTAGGCCAGGATATATATTACAGATCGGAAGAGCGGT	chr3	1356437785	1	1.7e-18	Minus	41:A>G	0	0	0	0	0	0	0	0	-	0	0	0	0	0	0	0	0	0	0	-	0	0	0	0	0	0	0	0	0	0	0	0	0	0	0	-	0	0	0	0
D01220	39979444	TGCAGAGCATGCATGTCATTGGTTTTTTCATTAGTTTGGCACTTTATTACAGATCGGAAGAGCGGTTCA	TGCAGAGCATGGATGTCATTGGTTTTTTCATTAGTTTGGCACTTTATTACAGATCGGAAGAGCGGTTCA	chr6	1469529428	1	7.27e-17	Minus	11:C>G	0	-	0	-	0	0	0	0	0	0	-	0	0	0	0	0	0	0	-	0	0	0	0	-	0	0	0	0	0	0	0	0	0	0	-	0	0	0	0	0
D01223	39978329	TGCAGAGGAAACTTTCCACTAGAATTTGTATTACAGATCGGAAGAGCGGTTCAGCAGGAATGCCGAGAC	TGCAGAGGAAACGTTCCACTAGAATTTGTATTACAGATCGGAAGAGCGGTTCAGCAGGAATGCCGAGAC	chr6	1058260926	1	1.98e-08	Minus	12:T>G	0	0	0	2	0	0	0	-	0	0	0	0	0	-	0	0	-	-	0	0	0	0	0	0	0	0	0	0	0	0	0	-	0	0	0	-	0	0	0	0
D01231	13905828	TGCAGAGTGAATGACGAAAAATACCAAAGAAACACAGTAAACATATAACAAAATTACAGATCGGAAGAG	TGCAGAGTGAATGACGAAAAATATCAAAGAAACACAGTAAACATATAACAAAATTACAGATCGGAAGAG	chr4	1269702	1	1.18e-20	Minus	23:C>T	0	0	0	0	0	0	0	-	0	0	-	0	2	0	-	0	0	0	-	0	0	0	0	-	0	0	0	-	0	0	-	0	0	-	-	0	0	0	-	0
D01241	3527176	TGCAGATAATAATGTACTCAATACACTTCAAGAAATTATTAGTAATTACATTACAGATCGGAAGAGCGG	TGCAGATAATAATGTACTCAATACACTTCAAGAAATTATTAGTAAGTACATTACAGATCGGAAGAGCGG	chr5	718980299	1	4.91e-19	Minus	45:T>G	0	0	0	-	0	0	0	0	-	0	-	0	0	0	0	0	0	0	-	0	0	0	0	0	0	0	0	-	-	0	0	0	0	0	-	0	0	0	0	-
D01242	39975535	TGCAGATAATCTCATCTGAAAGCCAGTCCTGAATTACAGATCGGAAGAGCGGTTCAGCAGGAATGCCGA	TGCAGATAATCTCATCTGAAAGCCAGTTCTGAATTACAGATCGGAAGAGCGGTTCAGCAGGAATGCCGA	chr1S	1538680013	1	5.86e-10	Minus	27:C>T	0	0	0	0	0	0	0	0	-	0	0	-	0	-	-	0	0	0	0	0	-	0	0	-	0	0	0	-	0	0	0	0	-	0	0	0	0	0	0	-
D01244	39978348	TGCAGATAATTATTTGCATTATGCCTCATAAACTTGTTACAGATCGGAAGAGCGGTTCAGCAGGAATGC	TGCAGATAATTATTTGCATTATGCCTCGTAAACTTGTTACAGATCGGAAGAGCGGTTCAGCAGGAATGC	chr4	1078485617	1	1.49e-11	Plus	27:A>G	0	0	0	0	0	0	0	0	1	-	0	0	0	0	-	-	0	0	-	0	0	0	0	0	0	0	0	-	0	0	-	0	0	0	0	0	0	-	0	-
D01269	39968887	TGCAGCAAAAATAAGCACAGGAGCATGTTTTACAGATCGGAAGAGCGGTTCAGCAGGAATGCCGAGACC	TGCAGCAAAAATACGCACAGGAGCATGTTTTACAGATCGGAAGAGCGGTTCAGCAGGAATGCCGAGACC	chr3	1414076762	1	6.24e-08	Minus	13:A>C	0	0	0	-	0	0	0	0	0	0	0	0	0	0	0	0	2	0	0	0	0	0	0	0	0	0	0	0	0	0	0	0	0	0	-	0	0	0	0	-
D01284	39968975	TGCAGCACAAGCACATATCAATTATATTTTACAGATCGGAAGAGCGGTTCAGCAGGAATGCCGAGACCG	TGCAGCACAATCACATATCAATTATATTTTACAGATCGGAAGAGCGGTTCAGCAGGAATGCCGAGACCG	chr3	972797542	1	1.92e-07	Plus	10:G>T	0	0	0	0	0	0	0	0	0	0	0	0	0	0	-	0	0	-	-	0	0	0	0	-	0	0	-	0	0	0	-	0	0	-	0	-	-	0	0	0
D01285	39975707	TGCAGCACAATATATAGTTTGAAATCAAAACAGCAATTTACAGATCGGAAGAGCGGTTCAGCAGGAATG	TGCAGCACAATATATAGTTTGAAATCAAAACAGCTATTTACAGATCGGAAGAGCGGTTCAGCAGGAATG	chr2	91346978	1	4.46e-12	Plus	34:A>T	-	-	-	0	0	0	0	-	0	0	0	0	0	0	0	0	0	0	0	0	0	0	0	0	0	-	-	0	0	0	0	0	-	0	-	0	0	-	0	0
D01292	39968996	TGCAGCACGTATTCTTCACGATGCATCTTTTACAGATCGGAAGAGCGGTTCAGCAGGAATGCCGAGACC	TGCAGCACGTATTCTCCACGATGCATCTTTTACAGATCGGAAGAGCGGTTCAGCAGGAATGCCGAGACC	chr2	393824968	1	6.24e-08	Plus	15:T>C	0	0	-	0	2	0	0	0	1	0	0	1	0	0	-	0	0	-	0	0	-	0	0	0	0	-	0	0	0	0	2	0	-	0	-	0	0	0	-	0
D01296	39975734	TGCAGCAGAAAATATAGATTACAAGAAGTCAAAGAGTATATGTATTATTTTACAGATCGGAAGAGCGGT	TGCAGCAGAAAATATAAATTACAAGAAGTCAAAGAGTATATGTATTATTTTACAGATCGGAAGAGCGGT	chr5	113879188	1	1.7e-18	Minus	16:G>A	0	0	0	0	0	0	0	0	-	0	0	-	0	0	0	0	0	0	0	0	0	0	0	0	0	0	0	0	0	0	0	0	0	0	0	-	0	0	0	0
D01305	39975753	TGCAGCAGGTTCTCACCAAGAGAAAGAGTTACAGATCGGAAGAGCGGTTCAGCAGGAATGCCGAGACCG	TGCAGCAGGTTCTTACCAAGAGAAAGAGTTACAGATCGGAAGAGCGGTTCAGCAGGAATGCCGAGACCG	chr5	109086776	1	1.92e-07	Plus	13:C>T	0	0	0	0	0	0	0	0	0	0	0	-	0	0	-	0	0	0	0	0	0	0	0	-	0	0	0	0	0	0	0	0	0	0	0	0	0	0	0	-
D01323	39975798	TGCAGCATTTGCAGCTGCACTGAAAGCATTACAGATCGGAAGAGCGGTTCAGCAGGAATGCCGAGACCG	TGCAGCATTTGCAGCTGCACAGAAAGCATTACAGATCGGAAGAGCGGTTCAGCAGGAATGCCGAGACCG	chr1L	857361087	1	1.92e-07	Minus	20:T>A	0	-	0	0	0	0	0	0	0	0	-	0	0	0	0	0	0	0	0	0	-	0	0	0	0	0	0	0	0	0	-	0	0	-	0	-	0	0	0	0
D01325	39969127	TGCAGCATTTTATTTTATTTAGGCATTGGAGCATCTTCAAAATAGGAAGATTACAGATCGGAAGAGCGG	TGCAGCATTTTATTTTATTTAGGCATTGGAGCATCTTCAAAATAGGAATATTACAGATCGGAAGAGCGG	chr6	559755621	1	4.91e-19	Plus	48:G>T	0	0	0	0	0	0	-	0	0	0	0	0	0	-	0	0	0	0	0	0	0	0	0	0	0	-	-	-	0	0	-	0	0	2	0	0	0	0	0	-
D01340	39969212	TGCAGCCTACCAAAGGTTCAAATGTTGGCAATAAAGTTTACAGATCGGAAGAGCGGTTCAGCAGGAATG	TGCAGCCTACCAAAGGTTGAAATGTTGGCAATAAAGTTTACAGATCGGAAGAGCGGTTCAGCAGGAATG	chr6	1222451509	1	4.46e-12	Minus	18:C>G	0	-	-	-	0	0	0	-	0	0	-	0	0	0	0	0	0	0	0	0	-	-	-	2	0	0	0	-	0	0	0	0	0	0	0	0	0	0	0	0
D01344	3532287	TGCAGCCTTTTTTGCCGCTGCTTCCTGCCTGGCTCTTTCCTCCTCCATTGAAACTCTTACAGATCGGAA	TGCAGCCTTTTTTGCCGCTGCTTCCTGCCTGGCTCTTTCCTCTTCCATTGAAACTCTTACAGATCGGAA	chr1L	1005006130	1	2.79e-22	Plus	42:C>T	0	0	0	0	-	0	0	0	0	0	0	0	0	-	-	0	0	0	-	0	0	0	0	0	0	-	0	0	0	0	0	0	0	0	0	-	0	-	0	0
D01347	39975868	TGCAGCTAAGAAGCGTTTATCCGGGGTTATCTCCAGCCGGTTTACTTGCTATACGAATTACAGATCGGA	TGCAGCTAAGAAGCGTTTATCTGGGGTTATCTCCAGCCGGTTTACTTGCTATACGAATTACAGATCGGA	chr1L	1668059706	1	8.01e-23	Minus	21:C>T	0	0	0	1	0	0	0	-	-	0	0	0	0	0	0	0	0	1	0	0	-	2	0	0	0	0	-	-	0	0	0	0	-	0	-	2	0	0	0	0
D01350	39969302	TGCAGCTACGACCGCATCTGTAATTTTACAGATCGGAAGAGCGGTTCAGCAGGAATGCCGAGACCGATC	TGCAGCTACGACCACATCTGTAATTTTACAGATCGGAAGAGCGGTTCAGCAGGAATGCCGAGACCGATC	chr1S	571666226	1	5.97e-06	Plus	13:G>A	0	0	-	0	0	0	0	0	0	0	0	-	2	0	-	-	0	0	0	0	0	0	0	0	0	0	-	-	0	0	0	0	0	0	0	0	0	0	-	0
D01353	39978488	TGCAGCTAGTCATTATTCTTTTTGAGATTTATTACAGATCGGAAGAGCGGTTCAGCAGGAATGCCGAGA	TGCAGCTAGTCATTATTCGTTTTGAGATTTATTACAGATCGGAAGAGCGGTTCAGCAGGAATGCCGAGA	chr3	1316120390	1	6.2e-09	Minus	18:T>G	0	0	-	-	0	0	0	0	0	0	-	0	0	0	0	0	0	0	2	-	0	0	0	0	-	-	-	0	0	0	-	0	0	0	0	-	0	0	0	0
D01354	39975884	TGCAGCTATTTCTCTTGATGAACATGTTTTTACAGATCGGAAGAGCGGTTCAGCAGGAATGCCGAGACC	TGCAGCTATTTCTCTTGACGAACATGTTTTTACAGATCGGAAGAGCGGTTCAGCAGGAATGCCGAGACC	chr1L	1242690483	1	6.24e-08	Minus	18:T>C	0	0	0	0	0	0	0	0	0	2	0	0	0	-	0	0	0	0	0	0	0	0	0	0	0	0	0	-	0	0	0	0	0	0	0	0	0	0	0	-
D01369	22857155	TGCAGCTGTCTTGATGCACGCTAGAGACTCCTTTTTACAGATCGGAAGAGCGGTTCAGCAGGAATGCCG	TGCAGCTGTCTTGATGCATGCTAGAGACTTCTTTTTACAGATCGGAAGAGCGGTTCAGCAGGAATGCCG	chr4	1473222714	1	1.63e-10	Plus	18:C>T	-	2	0	0	0	0	0	0	0	0	0	0	0	-	0	0	0	0	0	0	0	0	0	2	0	0	-	0	0	0	0	0	0	0	-	0	0	0	0	0
D01374	3525045	TGCAGCTTGTGCGGTGCCCGGTCTGTGACCTCAATACATGCGATGGTAATTTACAGATCGGAAGAGCGG	TGCAGCTTGTGCAGTGCCCGGTCTGTGACCTCAATACATGCGATGGTAATTTACAGATCGGAAGAGCGG	chr4	282889661	1	4.91e-19	Minus	12:G>A	0	0	0	0	0	0	0	0	0	0	0	0	0	0	0	0	0	-	0	0	0	0	0	0	0	0	2	-	0	0	0	0	0	0	-	0	0	0	0	0
D01377	32609098	TGCAGCTTTGTCAAGGAATCTATAAACATTTATCAATATTATTTTACAGATCGGAAGAGCGGTTCAGCA	TGCAGCTTTGTCAAGGAATCTATAAACATTTATCAATACTATTTTACAGATCGGAAGAGCGGTTCAGCA	chr5	884937080	1	2.94e-15	Plus	38:T>C	0	0	0	0	0	2	0	0	0	2	0	0	2	0	0	0	0	0	0	0	0	0	0	0	0	0	0	-	0	0	0	0	0	0	0	0	0	0	0	-
D01411	39969661	TGCAGGGATACAGCAGCAAAATCATTTACAGATCGGAAGAGCGGTTCAGCAGGAATGCCGAGACCGATC	TGCAGGGATACAGCAGCAGAATCATTTACAGATCGGAAGAGCGGTTCAGCAGGAATGCCGAGACCGATC	chr6	794258499	1	5.97e-06	Plus	18:A>G	0	0	0	0	0	0	0	0	0	0	0	2	0	0	0	0	0	0	0	0	0	0	0	0	0	0	0	0	0	0	0	0	0	0	1	0	0	2	0	0
D01429	39979587	TGCAGGTTCCAACATCCAGCGGTACACAGCTTTCTGAATAACACAACAAAATTACAGATCGGAAGAGCG	TGCAGGTTCCAACATCCAGCGGTAAACAGCTTTCTGAATAACACAACAAAATTACAGATCGGAAGAGCG	chr2	47209937	1	1.42e-19	Minus	24:C>A	0	0	0	0	0	0	0	-	0	0	-	0	0	0	-	0	0	0	0	0	0	0	0	-	0	0	0	0	0	0	-	0	0	0	0	0	0	0	0	-
D01451	3522656	TGCAGTATCTGGCAAAATCCGCTTATGCAAATTTTTACAGATCGGAAGAGCGGTTCAGCAGGAATGCCG	TGCAGTATCTGGCAAAATCCGCTTGTGCAAATTTTTACAGATCGGAAGAGCGGTTCAGCAGGAATGCCG	chr3	1380811239	1	1.63e-10	Minus	24:A>G	2	0	0	0	0	0	0	0	0	0	0	0	0	0	0	0	0	0	0	0	0	0	0	0	0	0	0	-	0	0	0	0	0	0	0	0	0	0	0	0
D01453	39970025	TGCAGTATGTTTTGACAGCATGCGAAACTATTACAGATCGGAAGAGCGGTTCAGCAGGAATGCCGAGAC	TGCAGTATGTTTTGACAGCATGCAAAACTATTACAGATCGGAAGAGCGGTTCAGCAGGAATGCCGAGAC	chr3	731989051	1	1.98e-08	Plus	23:G>A	0	0	0	0	0	0	1	0	0	-	0	-	0	-	0	0	0	0	0	0	0	0	0	0	0	0	0	-	0	0	0	0	-	0	0	0	0	0	0	0
D01463	13912030	TGCAGTGAAAACATCTTTGTCCATGATTTTACAGATCGGAAGAGCGGTTCAGCAGGAATGCCGAGACCG	TGCAGTGAAAACATCTTTGTCCATAATTTTACAGATCGGAAGAGCGGTTCAGCAGGAATGCCGAGACCG	chr1L	303886816	1	1.92e-07	Minus	24:G>A	0	0	0	0	0	0	0	0	0	0	0	0	0	-	0	-	0	0	-	0	2	2	0	0	0	0	0	-	0	0	0	0	0	0	0	-	0	0	-	-
D01466	39970172	TGCAGTGAGCCAAGAAAATGCAACGGTATATTCAATTACAGATCGGAAGAGCGGTTCAGCAGGAATGCC	TGCAGTGAGACAAGAAAATGCAACGGTATATTCAATTACAGATCGGAAGAGCGGTTCAGCAGGAATGCC	chr5	1210773055	1	4.94e-11	Plus	9:C>A	0	0	0	0	0	0	0	0	0	0	0	0	0	0	0	0	0	0	1	0	-	0	0	0	0	0	0	0	0	-	0	-	1	0	0	-	0	0	0	0
D01467	3520001	TGCAGTGAGGTCACATGATATTGCAACACTGTATTACTGTTTTACAGATCGGAAGAGCGGTTCAGCAGG	TGCAGTGAGGTCACATGATATTGCAACACTGTTTTACTGTTTTACAGATCGGAAGAGCGGTTCAGCAGG	chr3	1045956649	1	3.42e-14	Minus	32:A>T	0	0	0	0	0	0	0	0	0	0	0	-	0	0	-	-	0	0	0	-	0	0	0	0	0	0	0	0	0	2	0	0	0	0	0	0	0	0	-	-
D01471	13911335	TGCAGTGCAAGAGTTGAAAAGATAAAGGAACATAAAATAAAGCTATCAAATTACAGATCGGAAGAGCGG	TGCAGTGCAAGAGTTGAAAAGATAAAGGAACATAAAATAAAGCTTTCAAATTACAGATCGGAAGAGCGG	chr4	755562525	1	4.91e-19	Minus	44:A>T	0	0	0	-	0	0	0	0	0	0	-	0	0	-	0	0	2	0	-	0	0	0	0	0	0	0	0	0	0	0	1	0	0	0	0	1	2	0	0	-
D01492	39970366	TGCAGTTCAGGGGCCTAGTATAAGGTTTTACAGATCGGAAGAGCGGTTCAGCAGGAATGCCGAGACCGA	TGCAGTTCAGGGGCCTAGTCTAAGGTTTTACAGATCGGAAGAGCGGTTCAGCAGGAATGCCGAGACCGA	contig_4008	133971	1	5.77e-07	Plus	19:A>C	0	0	0	-	0	2	2	-	0	0	0	0	0	0	1	0	0	0	0	0	0	0	0	0	0	0	0	0	0	0	0	0	-	0	-	0	0	-	0	2
D01502	39979647	TGCAGTTGGTTTAGCTTGTTTTGCCTGAAAAGCAGTGGTTTCTTTACAGATCGGAAGAGCGGTTCAGCA	TGCAGTTGGTTTGGCTTGTTTTGCCTGAAAAGTAGTGGTTTCTTTACAGATCGGAAGAGCGGTTCAGCA	chr4	1128271512	1	2.94e-15	Plus	12:A>G	0	0	0	0	0	0	-	0	-	0	0	0	0	0	-	0	0	0	0	0	0	0	0	-	0	0	-	-	0	0	-	0	0	0	-	0	0	0	0	0
D01503	39976534	TGCAGTTTAGAGCATACCTTTCGATTTTACCAGATAAGGAAGACTTACATGAGAAGTTACAGATCGGAA	TGCAGTTTAGAGCATACCTTTCGATTTTACCAGATAAGGAAGACTCACATGAGAAGTTACAGATCGGAA	chr3	671084116	1	2.79e-22	Plus	45:T>C	0	0	-	2	0	0	0	0	0	0	-	0	0	0	0	-	0	0	0	0	1	0	0	0	0	0	-	-	0	0	0	0	0	-	-	0	0	0	-	-
D01506	39978764	TGCAGTTTCACTAGTTTATGTGGGGATTTTTAGTCTGAAACCTGACTTTTACAGATCGGAAGAGCGGTT	TGCAGTTTCACTAGTTTGTGTGGGGATTTTTAGTCTGAAACCTGACTTTTACAGATCGGAAGAGCGGTT	chr6	229797804	1	5.87e-18	Plus	17:A>G	0	2	0	0	0	0	0	0	0	0	0	0	0	0	0	0	0	0	0	0	0	0	0	0	0	-	0	-	0	0	0	0	-	0	-	0	0	0	0	0
D01517	39975200	TGCAGAAAATAAAGGACATGAAAAGTCATTACAGATCGGAAGAGCGGTTCAGCAGGAATGCCGAGACCG	TGCAGAAAATAAAGGAAATGAAAAGTCATTACAGATCGGAAGAGCGGTTCAGCAGGAATGCCGAGACCG	chr1L	1294883289	1	1.92e-07	Plus	16:C>A	0	-	0	-	0	0	0	-	0	0	0	0	0	0	-	-	0	0	0	0	0	0	0	0	0	0	0	0	0	0	0	0	0	0	-	-	0	-	0	-
D01532	22857519	TGCAGAATCAAACAGAATCAAAACGGTAAATTACAGATCGGAAGAGCGGTTCAGCAGGAATGCCGAGAC	TGCAGAATCAAACAGAATCAAAACGGAAAATTACAGATCGGAAGAGCGGTTCAGCAGGAATGCCGAGAC	chr2	598246985	1	1.98e-08	Minus	26:T>A	2	0	-	-	0	-	2	0	0	0	-	0	-	-	-	0	0	0	0	-	0	0	0	0	0	0	-	0	0	0	0	0	0	0	0	2	0	0	0	0
D01551	39968738	TGCAGATCACAGTCATAAATGGATATATAAAGAACCTAATGATCAAGAAATTACAGATCGGAAGAGCGG	TGCAGATCACAGTTATAAATGGATATATAAAGAACCTAATGATCAAGAAATTACAGATCGGAAGAGCGG	chr1L	733390681	1	4.91e-19	Minus	13:C>T	0	-	-	0	0	0	0	0	0	-	0	0	0	0	-	-	0	0	0	0	0	0	0	0	0	0	0	-	0	0	-	0	0	0	0	0	0	0	0	0
D01573	13911945	TGCAGCCAGCCCAAAAACACATATTATATTACAGATCGGAAGAGCGGTTCAGCAGGAATGCCGAGACCG	TGCAGCCAGCTCAAAAACACATATTATATTACAGATCGGAAGAGCGGTTCAGCAGGAATGCCGAGACCG	chr4	846120121	1	1.92e-07	Plus	10:C>T	0	0	0	0	0	0	2	0	-	0	0	0	0	-	0	0	0	-	-	0	0	0	0	0	0	-	-	0	0	0	0	0	-	0	-	-	0	0	0	-
D01586	39978516	TGCAGCTGTTTGTAAGAAAGGGTTGGTTGGACATAAGTTTACAGATCGGAAGAGCGGTTCAGCAGGAAT	TGCAGCTGTTTGGAAGAAAGGGTTGGTTGGACATAAGTTTACAGATCGGAAGAGCGGTTCAGCAGGAAT	chr2	286319788	1	1.33e-12	Minus	12:T>G	0	0	0	0	0	-	0	0	-	0	-	0	0	-	0	-	0	0	0	0	-	0	0	-	0	0	0	0	0	2	-	0	0	-	0	-	-	0	-	-
D01606	39978618	TGCAGGTTTTCTTTGCCCAGCTCATGCTAGCTGACATGAATAAAGAACTCAAAGGATTACAGATCGGAA	TGCAGGTTTTCTTTGCCCAGCTCATGCTTGCTGACATGAATAAAGAACTCAAAGGATTACAGATCGGAA	chr4	410875552	1	2.79e-22	Minus	28:A>T	0	0	-	0	0	0	0	0	0	0	-	0	0	0	-	0	0	0	0	0	0	0	-	0	0	-	-	0	0	0	0	0	0	0	0	0	0	0	0	0
D01623	13911270	TGCAGTCTCACCTTGGGACTTTTATAGGTTTTACAGATCGGAAGAGCGGTTCAGCAGGAATGCCGAGAC	TGCAGTCTCACCTTGGGTCTTTTATAGGTTTTACAGATCGGAAGAGCGGTTCAGCAGGAATGCCGAGAC	chr3	1206289764	1	1.98e-08	Minus	17:A>T	0	-	0	0	0	0	2	0	0	0	0	0	0	0	0	-	2	0	-	0	-	0	0	0	0	0	0	2	0	0	0	0	0	0	0	-	0	0	-	-
D01714	39976497	TGCAGTTCGACCATCCCAACCATATCTTGACCCAAATTCAGGTTATTTACAGATCGGAAGAGCGGTTCA	TGCAGTTCGACCATCCCAACCATATCTTGACCCAAATTTAGGTTATTTACAGATCGGAAGAGCGGTTCA	chr5	475244010	1	7.27e-17	Plus	38:C>T	0	-	0	0	0	0	0	0	0	0	0	-	0	0	0	-	-	0	0	0	0	0	0	0	0	0	-	0	0	0	0	0	0	0	0	0	0	0	0	0
D01733	39975987	TGCAGGAAGTAAAGAAGTCCTGATTTACCATGACAATTTTACAGATCGGAAGAGCGGTTCAGCAGGAAT	TGCAGGAAGTAAAGAAGTCCTGATTAACCATGACAATTTTACAGATCGGAAGAGCGGTTCAGCAGGAAT	chr3	515051458	1	1.33e-12	Plus	25:T>A	0	0	0	0	0	0	0	0	0	-	0	0	0	-	0	0	0	0	0	0	0	0	0	-	0	0	0	0	0	-	0	0	0	0	0	0	0	0	0	0
D01866	3530852	TGCAGAAAAATCATGCCAAAGCAAAATCTATACAAGCACAGAACAGAACAAGGTATAGCATATCTAATA	TGCAGAAAAACCATGCCAAAGCAAAATCTATACAAGCACAGAACAGAACAAGGTATAGCATATCTAATA	chr3	1297018119	1	9.88e-28	Minus	10:T>C	0	0	0	0	0	0	0	0	0	0	-	-	0	0	0	0	0	0	0	0	0	0	0	-	0	0	2	-	0	0	0	-	0	-	0	0	0	0	0	0
D01888	32609339	TGCAGAAAATGTTAGTGGAGGTGATTCTGTCGAACTCAGTACTACTACTACTGAATCTAGACATAGAGA	TGCAGAAAATGTTAGTGGAGGTGATTCTGTCGAACTCAGTACTACTACTACTGAACCTAGACATAGAGA	chr1S	1026312371	1	9.88e-28	Minus	55:T>C	0	-	0	0	1	0	0	0	0	0	0	0	0	0	0	0	0	0	0	0	0	0	0	-	0	0	-	0	0	2	0	0	0	0	0	0	0	0	0	0
D01891	39972071	TGCAGAAAATTGCTTACAGAGATGACAATGCAATGGTTTGAATTGCAGAACTGGTCATTTGCTAATCTA	TGCAGAAAATTGCTTACAGAGATGACAATGCAATGGTTTGCATTGCAGTACTGGTCATTTGCTAATCGA	chr1L	548983070	1	9.88e-28	Minus	40:A>C	0	0	0	-	0	0	0	0	0	0	0	-	2	0	0	-	0	0	-	0	0	0	0	0	0	0	0	0	2	0	-	0	0	-	0	0	0	0	0	-
D01920	39976944	TGCAGAAATTGAAAGAAGAATAGAGTTAGAAACGAAGGCCGAAAAGCATATTCAGAAACTTCTACTACT	TGCAGAAAATGAAAGAAGAATAGAGTTAGAAACGAAGGCCGAAAAGCATATTCAGAAACTTCTACTACT	chr3	1466316331	1	9.88e-28	Minus	8:T>A	0	-	-	0	0	0	0	0	0	0	0	0	0	0	-	0	0	0	-	-	0	-	-	0	0	0	0	0	0	0	0	-	0	0	-	0	0	0	0	0
D01921	22856508	TGCAGAAATTGAACTTTTTGCAGGAGTCCTTGAAGATGGCGGAGGCAATATCCTAATTGGTTTCTTCCC	TGCAGAAATTGAACTTTTTGCAGGAGTCCTTGAAGATGGCGGAAGCAATATCCTAATTGGTTTCTTCCC	chr5	858977426	1	9.88e-28	Minus	43:G>A	0	0	0	0	0	0	-	0	0	-	0	0	0	1	-	0	0	0	0	0	0	0	-	0	0	-	0	-	0	0	0	0	-	0	2	-	0	0	0	0
D01931	3525832	TGCAGAACAGCTACAAGTCTCAACAGTTTTTCCTAGATGAATAGTAAACAGTACTAAAACAAAATAATT	TGCAGAACAGCTACAAGTCTCAACAGTTTTTCCTAGATGAATAGTAAACAATACTAAAACAAAATAATT	chr3	499400585	1	9.88e-28	Minus	50:G>A	0	0	0	0	0	0	0	-	0	0	0	0	0	0	0	-	0	0	0	0	0	0	0	0	0	0	0	0	-	0	0	0	0	0	0	0	0	0	0	1
D01940	39963154	TGCAGAACCAAAGAATTGGCAAAATGCTATTAGAGTTGCTGTTCATGAGGTTTGTTTCCTTTGCTGTGC	TGCAGAACCGAAGAATTGGCAAAATGCTATTAGAGTTGCTGTTCATGAGGTTTGTTTCCTTTGCTGTGC	chr1L	1249397644	1	9.88e-28	Plus	9:A>G	0	0	0	0	0	0	0	0	0	-	0	-	0	0	-	-	0	0	0	-	0	-	0	0	0	0	0	0	0	0	-	0	0	0	0	0	0	-	0	0
D01951	3511136	TGCAGAACTTGACTTGAAAAGGCACCAAAATACACCTTGTTTCTTATCCCGCCCTAAAATGTGGGTTGA	TGCAGAACTTGACTTGAAAAGGCACCAAAATACACCTTGTTTCTTATCCCGCCCTGAAATGTGGGTTGA	chr2	237404033	1	9.88e-28	Plus	55:A>G	0	-	0	2	0	0	0	0	-	0	0	0	0	-	0	0	2	0	2	-	0	0	0	-	0	0	0	-	2	0	0	0	0	0	-	-	0	0	0	0
D01969	39971930	TGCAGAAGATATGACAATACATTTCTCTAAGAAAATCAATCATATTATATTGATGGCATTTCTGTCAAC	TGCAGAAGATATGACAATACATTTCTCTAAGAAAATCAATCATATTATATTGATGGCATTTCTATCAAC	chr4	1226354816	1	9.88e-28	Minus	63:G>A	0	0	0	0	0	0	0	-	0	0	0	0	0	0	0	0	0	0	0	0	0	0	0	-	0	0	0	0	0	0	0	0	0	0	0	0	0	0	0	0
D01979	39978917	TGCAGAAGCGGCTAACAAGCAGCATATGGAAGGTGTAAAGAAAATTGCTAAGTTGGAAGCTGAGTGCCA	TGCAGAAGCGGCTAACAAGCAGCATATGGAAGGTGTAAAGAAAATTGCTAAATTGGAAGCTGAGTGCCA	chr2	1305590674	1	9.88e-28	Plus	51:G>A	0	0	0	0	-	0	0	0	0	-	0	0	0	0	-	0	0	1	0	-	0	0	0	0	0	0	0	0	0	0	0	0	0	0	0	0	0	0	2	-
D01988	3514855	TGCAGAAGGGAAGCGACAAGCCAACTCAGCATAGCAAAGAGCTGAAAGAGCAGCTGCTAATCCAGCAAC	TGCAGAAGGGAAGCGACAAGCCAACTCAGCATAGCAAAGAGCTGAAAGAGCAGTTGCTAATCCAGCAAC	chr1S	1300105585	1	9.88e-28	Minus	53:C>T	0	0	0	0	0	0	0	0	-	0	0	0	0	0	0	-	0	0	0	0	-	0	0	-	0	0	0	-	0	0	0	0	0	0	0	0	0	0	0	0
D01991	39972280	TGCAGAAGGTCCCATAATCTAATCTATGCTTTACGACATTTTTTTATTATTCATGCTCCTTTCTGGGAA	TGCAGAAGGTCCCATAATCTAATCTATGCTTTACGACATTGTATTATTATTCATGCTCCTTTCTGGGAA	chr5	627494222	1	9.88e-28	Plus	40:T>G	0	-	0	0	0	0	-	0	0	-	0	0	0	2	0	0	0	0	0	0	0	0	0	0	0	0	0	0	0	0	0	-	0	0	0	-	0	0	-	0
D02013	39977022	TGCAGAATATACTTGAAGGCAAAACTCCCAGCTTTAGTTTTCCATCATAAGCATAAACAAGTCCACTGT	TGCAGAATATACTTGAAGGCAAAACTCCCAGCTTTAGTTTTCCATCATAAGCATAAGCAAGTCCACTGT	chr1L	958969527	1	9.88e-28	Minus	56:A>G	0	0	0	0	0	0	0	0	0	0	2	0	0	0	0	-	0	0	0	0	0	0	0	0	0	0	0	0	0	2	0	0	-	0	2	-	0	0	0	-
D02026	39963751	TGCAGAATGAGAAGAGTTCGGTTGAGATTGAGGCGAATCAGTTTCGGAGGATGGTGGAGGAGAGGCAAG	TGCAGAATGAGAAGAGTTCCGTTGAGATTGAGGCGAATCAGTTTCGGAGGATGGTGGAGGAGAGGCAAG	chr1L	1751871528	1	9.88e-28	Plus	19:G>C	0	0	0	-	0	0	-	0	-	0	0	0	0	-	0	0	0	0	-	0	0	0	0	0	0	0	-	0	0	0	0	0	0	0	0	-	0	-	0	0
D02040	13904359	TGCAGAATTTTACTTTCTCTAACAGATTCAAAATCATCTTTTATGTATAGAAGTGCTCCTGATATCACA	TGCAGAATTTTACTTTCTCTCACAGATTCAAAATCATCTTTTATGTATAGAAGTGCTCCTGATATCACA	contig_6622	19877	1	9.88e-28	Plus	20:A>C	0	-	0	0	0	0	0	0	0	0	-	0	0	0	0	-	0	0	0	0	0	0	-	0	-	0	0	0	0	0	0	0	-	-	0	0	0	0	1	-
D02049	32610272	TGCAGACACACGGCATGCTTACAGAGGACAAAAGCAGAATGTCAATGGCTGAGTAGTATACCTAGTAAT	TGCAGACACACAGCATGCTTACAGAGGACAAAAGCAGAATGTCAATGGCTGAGTAGTATACCTAGTAGT	chr2	1035242674	1	9.88e-28	Minus	11:G>A	0	0	0	0	0	0	0	0	0	0	1	0	0	-	0	0	0	0	0	0	0	0	-	0	0	0	0	0	0	0	2	0	0	0	2	0	0	0	2	-
D02053	32608310	TGCAGACAGCTCTCCGTTTGGATTTGGACGAGGAATAACAACATTCATCAAGGTCCCTATACATTCAAA	TGCAGACAGCTCTCCGTTTGGATTTGGACGAGGAATAACAACATTCATCAAAGTCCCTATACATTCAAA	chr1L	1715436521	1	9.88e-28	Plus	51:G>A	0	-	0	0	-	0	0	0	0	0	0	0	0	0	0	0	0	0	-	1	0	0	0	0	-	0	0	0	0	0	0	0	0	0	0	0	0	0	2	0
D02057	3523249	TGCAGACATGTAATGAGTGTAATAATAGCTTGACGTTGAAACAACACAATTTATTTTTCTACACTACAC	TGCAGACATGTAATGAGTGTAATAATAGCTTGACGTTGAAACAACATAATTTATTTTTCTACACTACAC	chr4	1083261333	1	9.88e-28	Minus	46:C>T	0	-	0	-	0	0	-	0	0	-	0	0	0	0	0	2	0	0	0	0	0	0	0	0	0	0	0	-	0	0	0	0	0	-	0	-	0	0	0	0
D02058	39963908	TGCAGACATTAGAAGAAAACTCATAGAGAGTTACAAAAGTTCAGAGCTAACCATCCATACAAAAACAAC	TGCAGACATTAGAAGAAAACTGATAGAGAGTTACAAAAGTTCAGAGCTAACCATCCATACAAAAACAAC	chr5	729360374	1	9.88e-28	Plus	21:C>G	0	-	0	-	0	0	0	0	0	0	0	0	0	0	-	-	0	0	0	0	-	0	0	0	-	0	0	0	0	0	0	0	-	-	0	0	0	0	0	0
D02065	13904387	TGCAGACTCCCCACGTTACAGAGCAACGAATATGGAAGTTATTGAACTTGATACTGGTAAATTTGGATG	TGCAGACTCTCCACGTTACAGAGCAACGAATATGGAAGTTATTGAACTTGATACTGGTAAATTTGGATG	chr2	419376622	1	4.6e-26	Plus	9:C>T	0	0	0	0	0	0	0	-	0	0	0	0	0	0	0	2	0	0	0	2	0	0	2	0	0	0	-	-	0	0	0	0	0	0	0	0	0	2	0	0
D02075	39964015	TGCAGACTTTTGTCCATAGCAGAGGAGACTTTAGCAGAGTTTCTATCAAAGGCTACTGGAACTGCTGTT	TGCAGACTTTTGTCCATAGCAGAGGAAACTTTAGCAGAGTTTCTATCAAAGGCTACTGGAACTGCTGTT	chr2	1236137336	1	9.88e-28	Plus	26:G>A	0	0	0	0	0	0	0	0	0	0	0	0	0	0	-	0	0	0	0	2	0	0	0	-	0	0	0	0	0	0	0	0	0	0	0	0	0	0	0	0
D02082	32609403	TGCAGAGAAGCTGTGGTCTGGACTGGAAAATTTTGTTTTTGACTGGCTAATAAACGCTGACAGGTAAAT	TGCAGAGAAGCTGTGGTCTGGACTGGAAAATTTTGTTTTTGACTGGCTAATAAATGCTGACAGGTAAAT	chr1S	879375025	1	9.88e-28	Plus	54:C>T	0	-	-	-	2	0	0	0	-	0	0	-	0	0	0	0	0	0	-	0	0	0	0	0	0	-	0	-	0	0	0	-	0	0	0	0	0	-	0	0
D02089	3514920	TGCAGAGAGAATAAAGATATGTTGAGTCTATACATTCAACGATAAAAAGAATCACTTTCATGTATCAAT	TGCAGAGAGAATAAAGATATGTTGAGTCTATACATCCAACGATAAAAAGAATCACTTTCATGTATCAAT	chr1L	1223490950	1	9.88e-28	Plus	35:T>C	0	0	-	0	0	0	0	0	2	0	0	0	0	0	-	0	2	1	1	0	0	-	0	0	0	-	-	0	0	2	0	0	-	-	-	0	2	0	0	-
D02110	3519072	TGCAGAGCACTCATTTGTTGAAAACACGCCTTCTCAGATTGCATTGTCCGCGTTTCTGGCTGCTTCCAA	TGCAGAGCACTCATTTGTTGAAAACACGCCTTCTCAGATTGCATTGTCCGCGTTTCTCGCTGCTTCCAA	chr1S	472056490	1	9.88e-28	Minus	57:G>C	0	0	0	0	0	0	0	0	-	-	0	0	0	-	-	-	0	0	0	-	0	0	0	-	0	0	-	-	0	0	0	-	-	-	0	-	0	0	0	0
D02121	3524029	TGCAGAGGCATCATTGTTCAAATCAATGATTCTAACTAGGTTGGAACCAAAGGCAGAGCCATTCCCTTG	TGCAGAGGCATCATTGTTCAAATCAAAGATTCTAACTAGGTTGGAACCAAAGGCAGAGCCATTCCCTTG	chr5	1136440309	1	9.88e-28	Minus	26:T>A	0	0	-	0	0	0	-	0	0	0	0	0	0	0	0	0	0	0	0	0	0	0	0	0	0	0	0	-	0	0	0	0	0	-	-	-	0	-	0	0
D02122	3524029	TGCAGAGGCATCATTGTTCAAATCAATGATTCTAACTAGGTTGGAACCAAAGGCAGAGCCATTCCCTTG	TGCAGAGGCATCATTGTTCAAATCAATGATTCCAACTAGGTTGGAACCAAAGGCAGAGCCACTCCCTCG	chr5	1136440303	1	9.88e-28	Minus	32:T>C	0	0	-	0	0	0	-	0	0	0	0	0	2	0	0	0	0	0	0	0	0	0	0	0	0	0	0	1	0	0	0	0	0	-	-	-	0	-	0	0
D02131	3514071	TGCAGAGTATATGCTGTCACTAGTAAAGGTCAAGTGGACATTTTCTGGTAAGTCTATGTGCATGTGTGT	TGCAGAGTATATGCTGTCACTAGTAAAGGTCAAGTGGACATTTTCTGGTTAGTCTATGTGCATGTGTGT	chr3	254025126	1	9.88e-28	Minus	49:A>T	0	0	0	0	0	0	0	0	0	0	0	0	0	0	0	0	0	0	0	-	0	0	0	0	0	0	0	0	0	-	0	-	0	0	0	0	0	0	0	0
D02132	3514071	TGCAGAGTATATGCTGTCACTAGTAAAGGTCAAGTGGACATTTTCTGGTAAGTCTATGTGCATGTGTGT	TGCAGAGTATATGCTGTCACTAGTAAAGGTCAAGTGGACATTTTCTGGTAAGTCTAAGTGCATGTGTGT	chr3	254025119	1	9.88e-28	Minus	56:T>A	0	0	0	0	0	0	0	0	0	0	0	0	0	0	0	0	0	0	0	-	0	0	0	0	0	2	0	0	0	1	0	-	0	0	0	0	0	0	0	0
D02136	3520081	TGCAGAGTCCAGATTCTACAGAACAAAAGCACTAAAGACCATGTCCGCTTAGTACAGATTCTAGAATAT	TGCAGAGTCCAGATTCTACAGAACAAAAGCACTAAAGACCATGTCCACTTAGTACAGATTCTAGAATAT	chr4	1568666616	1	9.88e-28	Minus	46:G>A	2	0	1	0	1	0	-	0	1	0	-	2	0	0	0	-	0	0	0	0	0	0	0	0	0	0	0	0	0	0	1	0	0	0	0	-	0	0	-	-
D02140	39964277	TGCAGAGTCTCGAAGGATTTGAACTGTATCCAGACTGTTGAATGTGTTTCAAAAGATAGTTCTCGTTGT	TGCAGAGTCTCGAAGGATTTGAACTGTATCCAGACTGTTGAATGTGTATCAAAAGATAGTTATCGTTGT	chr6	188447320	1	9.88e-28	Plus	47:T>A	0	0	-	0	0	0	1	0	0	-	0	0	2	0	0	0	0	0	0	0	2	0	0	-	0	0	0	-	0	0	0	0	0	0	0	0	0	0	0	0
D02141	32609427	TGCAGAGTCTGTTGTTAGAAAATTAGAGGAGGGCTGTTTCTTGATGTCAAATGGGCGGTATGTACTAAG	TGCAGAGTCTGTTGTTAGAAAATTAGAGGATGGCTGTTTCTTGATGTCAAATGGGCGGTATGTACTAAG	chr2	1211425628	1	9.88e-28	Minus	30:G>T	0	0	0	0	0	0	0	0	-	0	0	0	0	1	-	0	0	0	0	1	1	0	0	0	1	0	0	0	0	0	-	0	-	0	0	-	0	0	-	0
D02150	3521854	TGCAGAGTTTTTAGTTGTGATGAATAAATTGTAGTTTAGATTGCTAGTCAGTCTTCTTTTGAAAGACTT	TGCAGAGTTTTTAGTTGTGATGAATAAATTGTAGTTTAGATTGTTAGTCAGTCTTCTTTTGAAAGACTT	chr5	1022746310	1	9.88e-28	Minus	43:C>T	0	0	0	0	2	0	0	0	0	0	-	2	0	-	0	0	0	0	0	0	-	0	-	0	0	0	0	0	0	0	1	-	0	0	0	0	0	-	0	-
D02155	32608411	TGCAGATAAGATATATAAGCTCATCAGGAAAAAAAATCTGACAAGTAATTCTGTAACCCTGGTTATGTC	TGCAGATAAGATATATAAGCTCGTCAGGAAAAAAAATCTGACAAGTAATTCTGTAACCCTGGTTATGTC	contig_9391	104690	1	9.88e-28	Minus	22:A>G	0	-	-	0	0	0	0	0	1	-	0	0	0	-	0	-	0	0	0	0	-	0	0	-	0	0	0	0	0	0	0	0	0	0	0	2	0	0	-	0
D02158	32609439	TGCAGATAATCTCGATGTGTTTGTTCGAGCAGGAGGAAAGAATAAAGCGTATCACCTAGATCATTATGA	TGCAGATAATCTCGATGTATTTGTTCGAGCAGGAGGAAAGAATAAAGCGTATCACCTAGATCATTATGA	chr1L	1522036893	1	4.6e-26	Minus	18:G>A	0	1	0	0	0	0	0	0	0	0	0	0	0	0	-	0	0	0	0	0	1	-	-	-	0	-	-	-	0	0	-	0	0	0	0	0	0	0	0	0
D02162	3519967	TGCAGATACCAACTTGGTCCTTCAAAGCCTCTACAGCTCCAACACTAGCAGCCACGATCCAAGCTTTAC	TGCAGATACCAACTTGGTCCTTCAAAGCCTCTACTGCTCCAACACTAGCAGCCACGATCCAAGCTTTAC	chr1S	331350071	1	9.88e-28	Minus	34:A>T	0	0	0	0	0	0	0	-	0	0	0	0	0	0	0	-	0	0	0	-	0	0	-	2	0	1	2	0	0	0	0	0	-	0	-	0	0	2	-	0
D02168	32610308	TGCAGATATAATACAGCTTCCGCTTCCCAGGTACTGTTCTATTGTCCTTACTCCTTTGATAGCAGGGGG	TGCAGATATAATACAGCTTCCGCTTCCCAGGTACTGTTCTATTGTCCTTACTCCTTTGATAGCATGGGG	chr6	233874555	1	9.88e-28	Plus	64:G>T	0	0	-	0	0	0	0	0	0	-	0	-	0	0	0	0	0	0	0	0	0	-	0	0	0	0	0	0	0	-	0	0	0	0	0	-	0	0	0	-
D02182	3511974	TGCAGATCAATACACTATTTTCCTTATGTTACTTGACTGTGAAGTGGAAAAGAGCTGAACTAACACATC	TGCAGATCAATACACTATTTTCCTTATGTTACTTGACTGTGAAGTGGAATAGAGCTGAACTAACACATC	chr3	1400823692	1	9.88e-28	Minus	49:A>T	0	0	0	0	0	0	0	0	0	0	0	0	0	0	-	0	0	0	-	-	0	0	0	0	0	0	-	0	0	0	0	0	0	0	-	-	0	0	-	0
D02185	3519975	TGCAGATCCACGGACAGTTCTTCGAGCACGATCAATCAGGCTGAAGTTATAAAAAGAAGTTTATCATCC	TGCAGATCCACAGACAGTTCTTCGAGCACGATCAATCAGGCTGAAGTTATAAAAAGAAGTTTATCATCC	chr4	5495795	1	9.88e-28	Minus	11:G>A	0	0	-	0	2	0	0	0	0	0	0	0	-	-	0	0	0	0	0	0	0	-	0	0	0	-	0	-	0	0	1	0	-	-	0	-	0	0	0	0
D02186	3519975	TGCAGATCCACGGACAGTTCTTCGAGCACGATCAATCAGGCTGAAGTTATAAAAAGAAGTTTATCATCC	TGCAGATCCACGGACAGTTCTTCGAGCACGATCAATTAGGCTGAAGTTATAAAAAGAAGTTTATCATCC	chr4	5495770	1	9.88e-28	Minus	36:C>T	0	0	-	0	0	0	0	0	0	0	0	0	-	-	0	0	0	0	0	0	0	-	0	0	0	-	0	-	0	0	-	0	-	-	0	1	0	0	0	0
D02213	39964617	TGCAGATGTACTCCAGCATTTCAAAGTACTCGGGACCATTGAAGCACTGGCTGCTATTTTCAAGGTTTG	TGCAGATGTACTCCAGCATTTCAAAGTACTCGGGACCATTGAAGCACTGGCGGCTATTTTCAAGGTTTG	chr5	851998756	1	9.88e-28	Plus	51:T>G	0	0	0	0	0	0	0	0	-	0	0	0	0	0	0	0	0	0	0	0	0	0	0	0	0	0	0	-	0	0	0	0	-	0	0	0	0	0	0	-
D02220	39979014	TGCAGATGTTGGTGGCATAAACAACGTCAGACCCCCATCTATGCATAATCGATTCCGAAACATTGTTGC	TGCAGATGTTGGTGGCATAAACAACGTCAGACCCCCATCTATGCATAATCGATTCCGAAACATTGTTAC	chr1L	1780273603	1	9.88e-28	Plus	67:G>A	0	0	-	0	0	0	0	0	-	-	0	0	0	0	0	-	0	0	0	0	0	0	0	0	0	-	0	0	0	0	0	0	-	0	0	0	0	0	0	0
D02239	39972858	TGCAGATTGGAATCTGACGAGTTTGACATTCATTGAGATATCATTGGTAAACGAATATTGGATTGACAT	TGCAGATTGGATTCTGACGAGTTTGACATTCATTGAGATATCATTGGTAAACGAATATTGGATTGACAT	chr2	1577297800	1	9.88e-28	Minus	11:A>T	0	0	0	0	0	0	0	0	0	0	0	0	0	0	0	0	0	0	0	0	0	0	0	0	0	-	0	0	0	0	-	0	0	0	0	0	0	0	0	-
D02245	3519937	TGCAGATTTCCCATGAATACAGTATATAAAAACCAAGCAGTACCTTGTTCCATCCGGATGTGTTATAAT	TGCAGATTTCCCATGAATACAGTATATAAAAACCAAGCAGTACCTTGTTCCATCTGGATGTGTTATAAT	chr1L	747045178	1	9.88e-28	Plus	54:C>T	0	0	0	0	0	0	0	0	0	0	0	-	0	0	0	-	0	0	0	0	0	0	0	0	0	0	0	-	0	2	0	0	0	-	0	0	0	-	-	0
D02255	3521884	TGCAGCAAACAAGCACACTGCTGTAGTTTCTGATTTAGGTGAAGTTTTTACTTGGGGTGGCAATAGAGA	TGCAGCAAACAAGCACACTGCTGTAGTTTCTGATTTAGGTGAAGTGTTTACTTGGGGTGGCAATAGAGA	chr5	624908464	1	9.88e-28	Minus	45:T>G	0	0	-	0	0	0	0	0	0	0	-	0	0	0	0	-	0	0	0	0	2	0	-	-	0	0	0	0	0	0	-	0	0	0	-	-	0	0	0	0
D02262	32608440	TGCAGCAACAGATATTTCATTGGCTTTCTCTTCAGCTTCTTGGCGGATGAACCTAATCATCTGCTGGAT	TGCAGCAACAGATATTTCATTGGCTTTCTCTTCAGCTTCTTGGCGAATGAACCTAATCATCTGCTGGAT	chr6	320674200	1	9.88e-28	Plus	45:G>A	0	0	0	0	0	0	0	-	-	0	0	0	0	0	0	0	0	0	0	0	-	0	0	0	0	0	0	0	0	0	0	0	0	0	0	-	0	0	0	-
D02279	3529936	TGCAGCAATGACAGAGCTACAGAAGCTCTGTGATAAAGTAAGATTTGCTGCTCTTTTACCCGTTCATTG	TGCAGCAATGACGGAGCTACAGAAGCTCTGTGATAAAGTAAGATTTGCTGCTCTTTTACCCATTCATTG	chr3	63064679	1	9.88e-28	Plus	12:A>G	0	0	-	2	0	0	-	0	0	0	0	0	0	0	0	2	0	-	0	0	0	0	0	-	0	0	0	-	0	0	0	0	0	0	0	0	0	0	-	0
D02280	3529936	TGCAGCAATGACAGAGCTACAGAAGCTCTGTGATAAAGTAAGATTTGCTGCTCTTTTACCCGTTCATTG	TGCAGCAATGACAGAGCTACAGAAGCTCTGTGATAAAGTAAGATTTGCTGCTCTTTTATCCGTTCATTG	chr3	63064725	1	9.88e-28	Plus	58:C>T	0	0	-	0	0	0	-	0	0	0	0	0	0	0	0	0	0	-	0	0	0	0	0	-	0	0	0	-	0	0	0	0	0	0	0	0	0	0	-	0
D02281	3523912	TGCAGCAATGCAAATAACAAGAAGCTTACCAATTCTGTCCATGGACAAGATATTCGCAGAATTATTGAT	TGCAGGAATGCAAATAACAAGAAGCTTACCAATTCTGTCCATGGACAAGATATTCGCAGAATTATTGAT	chr1L	927587301	1	9.88e-28	Plus	5:C>G	0	0	-	0	0	0	0	0	0	0	0	0	0	0	0	-	0	0	0	0	0	0	0	0	0	-	-	0	0	0	0	0	0	-	0	2	0	0	-	0
D02291	39976852	TGCAGCACCCATTAGAAAAAACTGAGGTACCAACCAAAAGACACTCATGCTATGTAGTCGCGGGTAATG	TGCAGCACCCATTAGAAAAAACTGAGGTACCAACCAAAAGACACTCATGCTATGTAGTCGCGGGTATTG	chr2	1293579542	1	9.88e-28	Minus	66:A>T	0	0	0	0	0	0	0	0	0	0	0	-	0	-	0	-	0	0	0	0	-	0	0	-	0	0	0	0	0	0	-	0	0	-	0	0	0	0	0	-
D02303	39973044	TGCAGCAGAACGTGAGCAATGGAAGAAAGCTGTGCACGGTTAGTTGGTCTTTTGTACTTTGTTACTTTC	TGCAGCAGAAGGTGAGCAATGGAAGAAAGCTGTGCACGGTTAGTTGGTCTTTTGTACTTTGTTACTTTC	chr2	1012427408	1	9.88e-28	Plus	10:C>G	0	0	0	0	0	0	0	0	-	0	0	0	0	0	-	0	0	0	0	0	0	0	0	0	0	0	0	0	0	0	0	0	0	0	0	-	0	0	0	0
D02322	3523565	TGCAGCAGGTGTTTGTCCACACAAGAGGGAATGTTACCTTTGTTGCAGATCGTTGCTTCACCACAAAGA	TGCAGCAGGTGTTTGTCCACACAAGAGGGAATGTTACCTTTGTTGCAGATCGTTGCTTCACCACAAAAA	chr5	464894280	1	9.88e-28	Plus	67:G>A	0	2	0	0	0	0	0	0	0	0	2	0	0	1	1	0	0	0	2	0	0	0	-	2	0	0	2	0	0	2	0	1	0	0	0	0	0	0	1	-
D02346	18318836	TGCAGCATGATGTTCTTCGCTTTGTGGCAGCAATGCCTAATCATATGAGAATTAGTTGGAATCTTATGT	TGCAGCATGATGTTCTTCGCTTTGGGGCAGCAATGCCTAATCATATGAGAATTAGTTGGAATCTTATGT	chr1S	706573004	1	9.88e-28	Plus	24:T>G	0	0	0	0	0	2	0	0	0	0	0	0	0	0	0	-	0	0	0	0	0	0	0	0	0	0	0	0	0	0	0	0	0	0	0	0	0	0	0	0
D02355	22856697	TGCAGCATTGGCTTCAAGTCTGTTGCAATCAACTTCATGAATGTATCTTTCACGTAATCTAACATATTT	TGCAGCATTGGCTTCAAGTCTGTTGCAATCAACTTCATGAATGTATCTTTCACGTAACCTAACATATTT	chr2	1252553132	1	9.88e-28	Minus	57:T>C	0	-	0	0	0	0	0	0	-	-	-	0	0	0	0	-	0	0	-	1	0	0	-	-	0	0	0	-	0	0	-	0	0	0	0	0	0	0	0	0
D02357	3519462	TGCAGCCAAAATCTGTATTTTCACAATAAATAGAGTAGGAGTCAGAGGTTTTTCAGGAATTGAGGGAAG	TGCAGCCAAAATCTGTATTTTCACAATAAATACAGTAGGAGTCAGAGGTTTTTCAGGAATTGAGGGAAG	chr2	604717395	1	9.88e-28	Plus	32:G>C	0	-	0	0	1	0	0	0	-	1	0	0	0	0	0	-	0	0	0	-	0	0	0	0	0	1	-	0	0	0	1	0	-	0	-	0	0	-	0	-
D02363	32609756	TGCAGCCAATGAATATGATATTCCTAGTAATGCTTTGCTTTGTGGCAAAGCATTGGGACATCATTCTTA	TGCAGCCAATGAATATGATATTCCTAGTAATGCTTTGCTTTGTGGCAAAGCTTTGGGACATCATTCTTA	chr1L	1074090783	1	9.88e-28	Minus	51:A>T	0	-	0	0	0	0	0	-	-	0	0	0	0	0	0	-	0	0	0	-	0	0	0	-	0	-	-	0	0	0	0	0	0	0	0	0	0	0	0	0
D02371	39978875	TGCAGCCATCAGCAGCAGCAACCACTGATGCGAGTTGTGATTCGGTTGTTACTACTCCTCAGAATTCCA	TGCAGCCATCAGCAGCAGCAACCACTGATGCGAGCTGTGATTCGGTTGTTACTACTCCTCAGAATTCCA	chr6	215525033	1	9.88e-28	Plus	34:T>C	0	0	-	-	0	0	0	0	-	0	1	0	0	0	0	0	0	0	0	-	2	-	0	-	2	1	0	0	0	0	0	0	0	0	2	0	0	0	-	0
D02373	39973237	TGCAGCCATTGGATATTATACTCTCGCATGATCACAATCAAATAGTGGCTCTGTTAGAGTATGTCAGAT	TGCAGCCATTGGATATTATACTCTCTCATGATCACAATCAAATAGTGGCTCTGTTAGAGTATGTCAGAT	chr1L	1269935356	1	9.88e-28	Plus	25:G>T	0	0	0	0	0	0	0	0	0	0	-	0	0	0	0	0	0	0	-	0	-	0	0	0	0	0	0	0	0	0	0	0	-	0	-	0	0	0	0	0
D02411	13864997	TGCAGCCTTTTTCATTTTCTTTAGTTCTCTTTTTACTAGTCTTCTACAATTACAATATATCCAATGAGG	TGCAGCCTTTTTCATTTTCTTTAGTTCTCTTTTTACTAGTCTTCTACAATTACATAATGTCCAATGAGG	chr2	1279126537	1	9.88e-28	Plus	54:A>T	0	0	0	0	0	2	-	0	0	0	0	0	0	0	0	0	0	0	0	0	0	0	-	-	0	0	0	0	0	0	0	0	-	0	0	-	0	0	0	0
D02420	3519737	TGCAGCGCCAGATCTTTTTTACTGCATAATAACCTAAGCCTTTCCCGGTCACTTGTAACTGCCTCGAGA	TGCAGCGCCAGATCTTTTTTACTGCATAATAACCTAAGCCTTTCCCGGTCACTTGTAACTGCCGCGAGA	chr4	704354506	1	9.88e-28	Minus	63:T>G	0	-	0	0	0	0	0	-	0	0	-	0	0	0	1	0	0	-	0	0	0	0	0	0	0	0	0	0	0	0	0	0	0	0	0	-	0	0	0	-
D02449	13904686	TGCAGCTCATATATGTGGTATTGGTATAAAAGCCATCCCCGCAATAGCACACTTCTCCAGTCTTCGTTC	TGCAGCTCATATATGTGGTATTGGTATAAAAGCCATCCCTGCAATAGCACACTTCTCCAGTCTTCGTTC	chr2	506771748	1	4.6e-26	Plus	39:C>T	0	0	0	-	0	0	2	0	0	0	0	0	2	0	0	0	0	0	0	0	0	0	0	-	0	-	2	2	0	0	0	0	0	0	0	0	0	0	0	0
D02459	39979121	TGCAGCTCTAGGTGGCGCTCAGACTGGCATCCAGTCAAATCAAAATGGTTTGCATAATCAGTCAGCATT	TGCAGCTCTAGGTGGCGCTCAGACTGGCATCCAGTCAAATCAAAATGGTTTGCATAATCAGTCAGCGTT	chr3	869724530	1	9.88e-28	Minus	66:A>G	0	0	1	0	2	0	2	0	0	0	0	0	-	0	0	0	2	0	0	2	0	0	-	0	0	-	0	0	0	0	2	0	0	0	0	0	0	0	-	-
D02465	3509117	TGCAGCTGAAAACAAAGGGTTTGGAGTCAAACGCAACGAAACGCAATTTGAAGTCGTTCAGGTTTTTAT	TGCAGCTGAAATCAAAGGGTTTGGAGTCAAACGCAACGAAACGCAATTTGAAGTCGTTCAGGTTTTTAT	chr6	992351499	1	9.88e-28	Plus	11:A>T	0	0	0	0	0	0	0	-	-	0	0	0	0	0	0	0	0	0	0	0	0	0	0	0	0	-	2	-	0	0	0	0	0	-	-	0	0	-	0	1
D02469	39977584	TGCAGCTGAACCACCCATATCAAATTTCATGAGTTCAATTGAACAGCCAGGTCCGGTCTTGATGTTGTA	TGCAGCTGAACCACCCATATCAAATTTCATGTGTTCAATTGAACAGCCAGGTCCGGTCTTGATGTTGTA	chr4	1543479106	1	9.88e-28	Plus	31:A>T	0	0	0	0	0	0	0	0	0	-	0	0	0	0	-	0	0	0	0	0	0	0	0	0	0	-	0	-	0	0	-	0	0	0	0	0	0	-	-	-
D02472	3522606	TGCAGCTGAGTTTCACTTCTGCTTTCCCTTTTATCTTCTATTCTAGTTCTGTAATCATCTTAGTTCAGA	TGCAGCTGAGTTTCACTTCTGCTTTCGCTTTTATCTTCTATTCTAGTTCTGTAATCATCTTAGTTCAGA	chr4	729828160	1	9.88e-28	Plus	26:C>G	0	0	0	-	-	0	0	0	0	0	0	0	0	0	0	0	0	0	0	0	0	0	-	0	0	0	0	0	-	0	0	0	0	0	0	0	0	2	-	-
D02486	3518235	TGCAGCTGGTAAAATGCCTCTCGTTGTTGCTGAGAGGATGAAAAAGGACAACATTCAGCCGGATGAAGA	TGCAGCTGGTAAAATGCCTCTCGTTGTTGCTGAGAGGATGAAAGGGGACAACATTCAGCCGGATGAAGA	chr3	406651162	1	9.88e-28	Plus	43:A>G	0	0	0	0	0	0	0	0	-	0	0	0	0	0	0	0	0	0	0	0	0	-	0	0	0	0	-	0	0	0	-	0	0	0	0	0	0	0	2	0
D02496	22856756	TGCAGCTTATGCCGGTAGATATGGTATCCAGGCTTGGCAAGCATTCAAGGCTAGACCAGCTGGGATGCG	TGCAGCTTATGCCGGTAGATATGGTATCCAGGCTTGGCAAGCATTCAAGGCTACACCAGCTGGGATGCG	chr3	324321113	1	9.88e-28	Plus	53:G>C	0	-	0	0	0	0	0	0	0	-	0	-	0	0	0	0	0	0	0	-	0	0	0	0	0	-	-	0	0	2	0	0	0	0	0	0	0	0	0	0
D02503	39979144	TGCAGCTTCTTTCAATACTACCCTCTTTCAAGCCATTGGAAGTGTGAGTTTTTTCTTCTTCTTTATCTT	TGCAGCTTCTTTCAATACTACCCTCTTTCAAGCCATTGGAAGTGTGAGTTTTTTCTTCTTCTTTACCTT	chr1L	1771348661	1	9.88e-28	Plus	65:T>C	0	0	0	0	0	0	0	0	0	0	0	0	0	-	1	0	0	0	0	-	0	0	0	-	0	-	0	0	0	0	0	0	0	0	-	0	2	-	0	0
D02507	39976833	TGCAGCTTGCAGCTATATAGTATGCATAGGTAGCTGTAGAAAAACATATGTCTAGGAAATTACAGATCG	TGCAGCTTGCAGCTATATAGTATGCATAGGTAGCTGTAGAAAAACATATGTCTAGGAAATTAATGATCA	chr5	0	1	6.57e-24	Minus	62:C>A	0	-	2	0	0	0	0	0	0	0	-	0	-	0	0	0	0	0	0	-	0	0	0	0	0	0	0	0	0	0	0	0	-	0	-	0	0	0	0	0
D02509	39980098	TGCAGCTTGCATGCACTATGTCTGCAATAATCTTTCAGTAAAGGTAGTTGTAACATGTGAAAAGATGAC	TGCAGCTTGCACGCACTATGTCTGCAATAATCTTTCAGTAAAGGTAGTTGTAACATGTGAAAAGATGAC	chr5	620390126	1	9.88e-28	Minus	11:T>C	0	0	0	0	0	0	0	0	0	0	-	0	0	-	0	0	0	-	0	0	0	0	0	0	0	0	0	0	0	0	-	0	0	0	0	0	0	0	0	-
D02513	39965961	TGCAGCTTTCCAGCTATATGTTTAGATGGCTTCCTCTGAGAAAAGAGCAGCGTAATGGCTGTAATTCTG	TGCAGCTTTCCAGCTATATGTTTAGATGACTTCCTCTGAGAAAAGAGCAGCGTAATGGCTGTAATTCTG	chr2	1311560	1	9.88e-28	Minus	28:G>A	0	0	-	0	0	0	0	-	0	0	0	0	0	0	0	0	0	0	0	-	0	0	0	0	0	0	0	0	0	0	0	0	0	0	0	-	0	0	0	0
D02515	39977625	TGCAGCTTTCCTTTCAGTTGTGGACTAGTCAAATGCAAGAGACCTTGAATTTGAAGAAGCACGGAGATG	TGCAGCTTTCCTTTCAGTTGTGGACTAGTCAAATGCAAGAGACCTTGAATTTGAAGAAGCATGGAGATG	chr2	1554452894	1	4.6e-26	Minus	61:C>T	1	1	1	1	1	1	1	1	1	1	1	1	1	0	1	1	1	1	-	1	1	2	0	1	1	1	-	1	1	1	1	1	-	1	1	1	1	2	1	1
D02529	18314613	TGCAGGAAATGAGAAAAGACAAATAGTTCTGGGAAGAAATATTCATACCTCGTGTCTTGAAGTTACGGA	TGCAGGAAATGAGAAAAGACAAATAGTTCTGGGAAGAAATATTCATACCTCGTGTCTTGAAGTTACTGA	chr1L	1773179852	1	9.88e-28	Minus	66:G>T	0	0	-	2	0	0	0	0	0	1	0	0	2	-	0	2	2	0	0	0	0	0	-	0	0	0	0	0	0	0	0	0	0	0	0	0	0	0	0	0
D02533	39966055	TGCAGGAACCATCTCCTTGAGTGTAGTTTCCACCACCACTCCTGTGGGATCACATATCAATTGGAACAT	TGCAGGAACCATCTCCTTGAGTGTAGTTTCCACCACCACTCCTGTGGGATCACATATCAGTTGGAACAT	chr1S	1019056276	1	9.88e-28	Plus	59:A>G	0	0	0	0	0	0	0	0	0	0	0	0	0	0	0	0	0	0	0	0	0	0	0	0	0	0	0	0	0	0	0	0	0	0	0	0	0	0	0	0
D02545	32611674	TGCAGGAATGCTACTTCCCGATCTCTCTGTCTGGTGGATGAATTTGGTAAAGGTACTCTTACAGAAGGT	TGCAGGAATGCTACTTCCCGATCTCTCTGTCTGTTGGATGAATTTGGTAAAGGTACTCTTACAGAAGGT	chr1L	520830474	1	9.88e-28	Minus	33:G>T	0	0	0	0	0	0	0	0	0	0	-	0	0	0	0	-	0	1	0	0	0	0	0	0	-	0	0	0	0	0	0	0	-	0	0	0	0	0	0	0
D02562	3509402	TGCAGGATAAGGCTTGATATACAGCAACAAAAAAATTGTACAGGCATTACAAACCTGGAAGCCAAACAC	TGCAGGATTAGGCTTGATATACAGCAACAAAAAAATTGTACAGCCATTACAAACCTGGAAGCCAAACAC	chr2	514344925	1	9.88e-28	Minus	8:A>T	2	0	0	0	0	0	0	-	-	0	0	0	0	0	0	-	0	0	-	0	0	0	-	0	0	-	0	0	0	0	-	0	0	0	0	2	2	0	0	0
D02563	13865119	TGCAGGATACTTTGTTTGGGCTGTTCTAATTGCTAACTTGGCACGCATTGGTTATGAAGAAAAGACTAT	TGCAGGATACTTTGTTTGGGCTGTTCTAATTGCAAACTTGGCACGCATTGGTTATGAAGAAAAGACTAT	chr4	371501209	1	9.88e-28	Plus	33:T>A	0	2	0	0	0	0	0	0	0	0	0	0	0	0	-	-	0	0	-	0	-	0	0	0	0	0	0	2	0	2	0	0	0	0	0	0	0	0	0	0
D02565	18320357	TGCAGGATAGTCAGAAACCATAAATGAGATGTTATTTATAGTCCAAACCCTAAACCCAACATTAGATTT	TGCAGGATAGTCAGAAACCATAAATGAGATGTAATTTATAGTCCAAACCCTAAACCCAACATTAGATTT	chr2	1089397385	1	9.88e-28	Minus	32:T>A	0	0	0	0	0	0	0	0	0	0	-	0	0	0	0	0	0	0	0	0	1	-	0	-	0	0	0	-	0	0	0	0	-	0	0	0	0	0	0	-
D02576	13866602	TGCAGGATGCTCTGAAAGGAGATCTGAATAGTCCTTTGTCGACAAATTAGCTGAAAAAATAGTGCACCA	TGCAGGATGCTCTGAAAGGAGATCCGAATAGTCCTTTGTCGACAAATTAGCTGAAAAAATAGTGCACCA	chr6	905873724	1	4.6e-26	Plus	24:T>C	1	1	1	1	1	2	-	2	1	1	1	1	2	-	1	1	1	1	-	0	1	1	1	1	1	1	0	1	0	1	1	1	1	2	1	1	1	1	1	1
D02577	39966270	TGCAGGATGGAAGACAAAACTCATAAATAAATGCCAATATGTCTATTTCATTTAGAGGTTATGTATGGA	TGCAGGATGGAAGACAAAACTCATAAGTAAATGCCAATATGTCTATTTCATTTAGAGGTTATGTATGGA	chr1S	865783507	1	9.88e-28	Plus	26:A>G	2	0	0	2	0	0	-	0	0	0	0	0	0	-	0	0	0	0	0	0	-	2	0	0	0	0	0	-	0	0	0	-	0	0	-	1	0	0	-	0
D02587	39979850	TGCAGGCAACTCTCCATTAGGCCCACTCTGTATAATAATCAAATAACTTGATCAAACATGATCAATGAG	TGCAGGCAACTCTCCATTAGGCCCACTCTGTATAATAATCAAATAACTTGATCAAACATGATCAATGAA	chr3	232475888	1	9.88e-28	Plus	68:G>A	0	-	-	0	0	2	0	0	2	0	0	0	0	0	1	-	0	0	1	0	0	-	0	2	0	0	0	0	0	0	0	0	0	0	0	-	0	0	0	0
D02591	32608528	TGCAGGCAGGGGCAGGAACTGCAAATCAAAGATTGATAATAGATCAATCAGAGCGTGAGACTACGAAAG	TGCAGGCAGGGGCAGGAACTGCAAATCAAAGATTGATAATAGATCAATCAGAGTGTGAGACTACGAAAG	chr1S	20613480	1	9.88e-28	Plus	53:C>T	0	0	-	0	0	0	0	-	0	0	0	2	0	0	0	0	0	0	-	0	0	0	0	0	0	-	0	0	0	0	-	0	0	0	0	-	0	-	-	-
D02604	39973852	TGCAGGCTAAGTTCTACAGCCACTTCACCTTCCGATTTTGTAACCGTTTTATCAACGTACGGTTTCTTG	TGCAGGCTAAGTTCTACAGCCACTTCACCTTCCGATTTTGTAACCGTTTTATCAACGTACGGTTTCTTA	chr6	380658291	1	9.88e-28	Plus	68:G>A	0	0	0	0	0	0	0	0	0	0	0	0	0	0	0	0	0	0	0	-	0	0	0	-	0	0	0	0	0	0	0	0	0	0	-	-	0	0	0	0
D02614	39973886	TGCAGGGAACTTTTACAGGGCCAAGAATATTTTGGTCTGGCTCCAGTCTTCGACCTGAAGCTACTGGCT	TGCAGGGAACTTTTACAGGGCCAAGAATATTTTGGTCTGGCTCCAGTCTACGACCTGAAGCTACTGGCT	chr4	410875898	1	9.88e-28	Minus	49:T>A	0	0	0	-	0	0	0	0	0	0	0	0	0	0	1	-	0	0	0	0	0	0	2	-	0	0	-	0	0	0	0	0	0	-	0	0	0	0	0	-
D02616	32609597	TGCAGGGAAGCTGTCTACTCCGCCTCCTTCAGTTCCTGGTTTTGGAATAGCTAGCCCTAATACAGTTAC	TGCAGGGAAGCTGTCTACTCCTCCTCCTTCAGTTCCTGGTTTTGGAATAGCTAGCCCTAATACAGTTAC	chr6	219809406	1	9.88e-28	Plus	21:G>T	0	0	0	0	0	0	0	0	-	0	0	0	0	0	-	1	0	0	0	0	0	0	0	0	-	0	-	0	0	0	0	0	0	-	0	0	0	0	-	0
D02624	3523648	TGCAGCGATGGGGCATTGTTGTCTGAATCAAGATTTGGGAGAGAGAAAAATAATGAAACTTTGATGACA	TGCAGGGATGGGGCATTGTTGTCTGAATCAAGATTTGGGAGAGAGAAAAATAATGAAACTTTGATGACA	contig_4458	4964	1	9.88e-28	Plus	5:C>G	0	0	0	0	2	2	0	0	0	-	0	0	0	0	2	0	0	0	0	-	-	0	0	-	0	0	0	-	-	0	0	0	0	-	0	-	0	0	-	0
D02630	39977747	TGCAGGGCTGAATTGGTGGGGGAAGCTATGGAGTTGATAAAGAAAATGCCCATGCCACCAGATGTGCAG	TGCAGGGCTGAATTGGTGGGGGAAGCTATGGAGTTGATAAAGAAAATGCCCATGCTACCAGATGTGCAG	chr4	1323354865	1	9.88e-28	Minus	55:C>T	0	0	0	0	0	0	0	0	0	0	0	0	0	0	0	-	0	0	0	0	0	-	0	0	0	0	0	0	0	0	0	0	0	0	0	-	0	-	-	0
D02634	13868518	TGCAGGGGCACTATCATTACCACTATCTTCGCTATCTGATATCCTAACCTGTAGAAAAAACAATCTTTT	TGCAGGGGCACTATCATTACCACTATCTTCGCTATCTGATATCCCAACCTATAGAAAAAACAATCTTTT	chr4	688015407	1	9.88e-28	Plus	44:T>C	0	0	0	0	0	0	0	0	0	0	0	0	0	0	0	0	0	0	0	0	-	0	0	0	0	0	0	0	0	0	0	0	0	0	0	-	0	0	0	0
D02642	39966559	TGCAGGGTCTAGAAATGCATATGAGTTCTGCTGCTGACAAGGTATTTCTTCAGAAAAAGAAGTGCTACT	TGCAGGGTCTAGAAATGCATATGAGTTCTACTGCTGACAAGGTATTTCTTCAGAAAAAGAAGTGCTACT	chr1L	1535423373	1	9.88e-28	Plus	29:G>A	0	0	0	0	0	0	0	0	0	0	0	0	0	0	0	0	0	0	0	0	-	0	0	0	0	0	0	0	0	0	0	0	0	-	0	0	0	0	-	0
D02659	3521634	TGCAGGTATGGTATATATGTCCAGAAATCCGTAGGAGCTGCTTCTTTTTACTGGAAGTTTGAGTTTCAA	TGCAGGTATGGTATATATGTCCAGAAATCCGTCGGAGCTGCTTCTTTTTACTGGAAGTTTGAGTTTCAA	chr1L	903699886	1	9.88e-28	Plus	32:A>C	0	-	0	0	0	0	0	0	0	0	0	0	0	0	0	0	0	0	-	0	-	0	0	0	0	0	0	-	0	0	0	0	-	0	-	0	0	0	0	0
D02668	39966746	TGCAGGTGGTACATTTGCATTGTATTCCTTGATTTGTCGTAATGCTAAGGTGAATCTTCTTCCCAATCA	TGCAGGTGGTACATTTGCATTGTATTCCTTGATTTGTCGTAATGCTAAGGTGAATCTTCTTACCAATCA	chr1S	1444068365	1	9.88e-28	Minus	61:C>A	0	0	-	-	0	0	0	0	0	0	0	0	0	0	0	0	-	0	0	0	-	-	0	-	0	0	-	0	0	0	-	0	-	-	0	-	0	0	0	0
D02672	18318920	TGCAGGTGTGTTATGCAATATTCATGTGAAGTTTGTTTAGTTTTTTGCAACTGCATGATATGATAGGGA	TGCAGGTGTGTTATGCAATATTTATGTGAAGTTTGTTTAGTTTTTTGCAACTGCATGATATGATAGGGA	chr4	1232036290	1	9.88e-28	Minus	22:C>T	2	-	0	0	0	0	-	0	-	0	-	0	0	0	1	0	2	0	0	0	0	1	-	0	0	0	0	-	0	0	-	0	0	0	-	-	0	0	0	-
D02688	13863742	TGCAGGTTTAGAATGTACATGGTGGGATTGTATATCTGAATCAGTAAACTTGAATAAATAGCAAATAAT	TGCAGGTTTAGAATGTACATGGTGGGATTGTATATCTGAATCAGTAAACTTGAATAAATAGATAATAAT	chr1S	545246657	1	9.88e-28	Plus	61:C>A	2	0	0	0	0	0	0	-	1	0	2	-	0	0	-	-	0	0	0	-	0	0	0	0	0	0	0	0	0	0	0	0	0	0	2	2	0	2	0	0
D02707	39979234	TGCAGTAAATAAGGATGATAAGGTCAAAGCTTTTGACAGCAGTGGTATTACTGGAAAGCGGAAAAGAAA	TGCAGTAACTAAGGATGATAAGGTCAAAGCTTTTGACAGCAGTGGTATTACTGGAAAGCGGAAAAGAAA	chr1L	618223283	1	9.88e-28	Minus	8:A>C	0	0	0	0	0	0	0	0	-	0	-	0	0	0	0	0	0	0	0	0	0	0	0	0	0	0	0	0	0	0	0	0	0	0	0	0	0	0	0	0
D02712	3518574	TGCAGTAAGAAGATGTAAGCGAACCTGCATCAAGACACAGAAGTTACTCATGCTTCAAATAAGTGATAA	TGCAGTAAGAAGATGTAAGCGAACCTGCATCCAGACACAGAAGTTACTCATGCTTCAAATAAGTGATGA	chr2	1214594465	1	9.88e-28	Minus	31:A>C	0	0	0	0	-	0	2	0	0	0	0	0	0	0	0	-	0	0	0	1	0	0	0	0	0	0	0	0	0	0	-	0	0	0	0	0	0	0	0	0
D02719	3515958	TGCAGTAAGTTTTTGTGTGTGTGGTTTTAGAGCAAGTTGCTAGTGAGTATTATTCAACGTGGAAGATGT	TGCAGTAAGTTTTTGTCTGTGTGGTTTTAGAGCAAGTTGCTAGTGAGTATTATTCAACGTGGAAGATGT	chr3	847772410	1	9.88e-28	Plus	16:G>C	0	-	2	1	0	0	0	0	0	0	0	0	0	0	0	-	2	1	-	0	0	0	0	-	0	0	0	0	0	0	0	0	0	2	-	-	0	2	2	0
D02725	13904878	TGCAGTAATCAAACAGATGCATTTACGCATTCGGGACGTATGTGACCATCTAAACTTGATTAGTCAGTT	TGCAGTAATCAAACAGATGCATTTATGCATTCGGGACGTATGTGACCATCTAAACTTGATTAGTCAGTT	chr3	38451911	1	9.88e-28	Minus	25:C>T	0	0	-	0	0	0	0	0	0	0	0	0	0	0	0	0	0	0	0	0	-	0	0	0	0	-	0	0	0	0	-	0	0	0	-	0	0	2	0	2
D02733	39977850	TGCAGTAATTGCAGAGTTATTGGAGGAAACAACCTTGGATCTGGTGGTGTCTTTGATAAATTCTGATAA	TGCAGTAATTGCAGAGTTATTGGAGGAAACAACCTTAGATCTGGTGGTGTCTTTGATAAATTCTGATAA	chr3	659633620	1	9.88e-28	Plus	36:G>A	0	0	1	1	2	0	0	0	0	0	2	1	0	-	0	0	0	0	0	0	0	0	0	0	0	0	-	-	0	1	0	0	-	0	-	0	0	0	-	0
D02736	13904880	TGCAGTAATTTTAGGAGTCTAGATAGTGAACCCATAGTCAAGAGGGGGGCTTTTTTTTTTCTTCATTTT	TGCAGTAATTTTAGGAGTCTAGATAGTGAACCCATAGTCAAGAGGGGAGCTTTTTTTTTTCTTCATTTT	chr6	770713914	1	9.88e-28	Plus	47:G>A	0	0	1	0	2	0	-	0	0	0	0	0	0	0	0	0	0	0	0	0	0	-	0	-	0	0	0	0	0	0	1	1	0	0	0	0	0	0	-	0
D02745	39963134	TGCAGTACCAGAATAAAGGACAAAAAGACATCTTCAAGTGCATTACCAAAATAATCACAAACAAGATAA	TGCAGTACCAGAATAAAGGACAAAAAGACAACTTCAAGTGCATTACCAAAATAATCACAAACAAGATAA	chr1L	654985573	1	9.88e-28	Plus	30:T>A	0	0	0	0	0	0	0	0	0	0	0	0	0	0	-	0	0	0	0	0	0	-	-	-	0	0	0	0	0	0	0	0	-	2	0	0	0	0	-	-
D02758	39974290	TGCAGTAGTAGCAGACTGCAACATAGAAAACGAGAAGTTTAGGTAGAAGATAAAAGGATAAAAAAATAT	TGCAGTAGTAGCAGACTGCAACATAAAAAACGAGAAGTTTAGGTAGAAGATAAAAGGATAAAAAAATAT	chr1S	291531898	1	9.88e-28	Minus	25:G>A	0	-	0	0	0	0	0	-	0	0	-	0	0	0	0	0	0	0	0	0	0	0	0	0	-	0	0	0	0	0	0	0	-	0	0	1	0	0	-	0
D02770	39974314	TGCAGTATCAAAGCTAGCAGGTTGAGGATGTTACCTGTATACCCTGGAATATATGGAACTATGTTCCAT	TGCAGTATCAAAGCTAGTAGGTTGAGGATGTTACCTGTATACCCTGGAATATATGGAACTATGTTCCAT	chr2	647824515	1	9.88e-28	Minus	17:C>T	0	0	0	0	0	0	0	0	0	0	0	0	0	0	0	0	0	0	-	0	0	0	-	0	0	0	0	-	0	0	0	0	-	0	0	0	0	0	-	0
D02775	18318938	TGCAGTATGACTAGGTGGATCAATCTTTTTTGGTCTCAATTCCTGCCTTGGTTCAGTTGTACCAATTAC	TGCAGTATGACTAGGTGGATCAATCTTTTTTGGTCTCAATTCCTGCCTTGTTTCAGTTGTACCAATTAC	chr4	368543265	1	9.88e-28	Plus	50:G>T	0	0	0	0	0	0	0	2	0	0	0	0	0	0	2	-	0	0	-	0	0	0	0	0	0	0	0	0	0	0	0	0	0	0	0	0	0	0	0	0
D02780	32610532	TGCAGTATTTCTTGTGATAACTAGGATATTGTAAATTCTCGCACTTTCAAGGTGATACCGCTGTGCATA	TGCAGTATTTTTTGTGATAACTAGGATATTGTAAATTCTCGCACTTTCAAGGTGATACCGCTGTGCATA	chr1L	1185932630	1	9.88e-28	Minus	10:C>T	2	0	0	0	0	0	-	0	0	0	-	2	0	0	0	0	0	0	0	0	0	0	0	0	0	0	0	-	0	0	0	0	-	-	0	-	0	0	0	-
D02794	32611197	TGCAGTCATGCAATCCTTGTCTATCTTGCTTCTGCTTTTCCTAGAATTGCTGATCATTGGTTAGTCCAT	TGCAGTCATGCAATCCTTGTCTATCTTGCTTCTGCTTTTCCTAGAATTGGTGATCATTGGTTAGTCCAT	chr6	1310795831	1	9.88e-28	Minus	49:C>G	2	-	0	0	0	0	0	0	0	0	0	0	0	0	-	0	0	0	2	0	0	0	0	-	0	-	0	-	0	0	-	0	0	0	0	-	0	1	0	-
D02796	39977909	TGCAGTCATGGAGGACTAGAAGATACAGGGCTGAATATTTTTCATGATATGACCAGTGGAAAAATTGGA	TGCAGTCATGGAGGACTAGAAGATACAGGGCTGAATATTTTTCATGATATGACCGGTGGAAAAATTGGA	chr3	137074869	1	9.88e-28	Minus	54:A>G	0	-	0	0	0	0	0	0	2	0	0	-	0	0	0	0	0	0	-	0	0	0	0	0	0	-	-	0	0	0	0	0	0	0	0	0	0	0	0	-
D02807	39974406	TGCAGTCCCCATATTTGAAGTGTTGTTTGCAAATAGATGCGGTGATTGTAAGCAACCCTAGAGTTGGAA	TGCAGTCCCCATATTTGAAGTGTTGTTAGCAAATAGATGCGGTGATTGTAAGCAACCCTAGAGTTGGAA	chr1L	200914815	1	9.88e-28	Minus	27:T>A	0	0	0	0	0	0	0	0	0	0	-	0	0	0	0	-	0	0	0	0	0	0	0	0	0	0	0	0	0	0	0	0	0	-	0	0	0	0	0	-
D02808	39974406	TGCAGTCCCCATATTTGAAGTGTTGTTTGCAAATAGATGCGGTGATTGTAAGCAACCCTAGAGTTGGAA	TGCAGTCCCCATATTTGAAGTGTTGTTTGCAAATACATGCGGTGATTGTAAGCAACCCTAGAGTTGGAA	chr1L	200914807	1	9.88e-28	Minus	35:G>C	0	0	0	0	0	0	0	0	0	0	-	0	0	0	0	-	0	0	0	0	0	0	0	0	0	0	0	0	0	0	0	0	0	-	0	0	0	0	0	-
D02827	3522454	TGCAGTCTATCGTTGTATTTGCAAAACTGACGCGATAGGCATTGATAAGAATTGGTTTGATTCTCAGCT	TGCAGTCTATCGTTGTATTTGCAAAACTGATGCGATAGGCATTGATAAGAATTGGTTTGATTCTCAGCT	chr3	990079118	1	9.88e-28	Plus	30:C>T	0	-	-	0	0	0	0	0	-	0	-	0	0	0	-	0	0	0	-	0	0	0	0	0	0	0	0	0	0	0	0	-	-	0	-	0	0	0	0	0
D02832	3521246	TGCAGTCTGATCAGAGATAAGCTGTACAATCTGATCATGTAAATTGCCGTTGGTAGCAAGGATGCCGCC	TGCAGTCTGATCAGAGATAAGCTGTACAATCTGATCATGTAAATTACCGTTGGTAGCAAGGATGCCGCC	chr1L	1735615604	1	9.88e-28	Minus	45:G>A	0	0	0	0	0	0	0	0	0	0	-	0	0	0	-	0	0	0	0	0	0	-	0	0	0	0	-	-	-	0	2	0	1	0	0	-	0	2	0	0
D02833	3521246	TGCAGTCTGATCAGAGATAAGCTGTACAATCTGATCATGTAAATTGCCGTTGGTAGCAAGGATGCCGCC	TGCAGTCTGATCAGAGATAAGCTGTACAATCTGATCATGTAAATTGCCGTTGGTAGCAAGGATGCCTCC	chr1L	1735615583	1	9.88e-28	Minus	66:G>T	0	0	0	0	0	0	0	0	0	0	-	0	0	0	-	0	0	0	0	0	0	-	0	0	0	0	-	-	-	0	0	0	-	0	0	-	0	2	0	0
D02839	32611206	TGCAGTCTGTTGAGGAAGTGAGACAAAAATTACGCGCAAAAACTAACTATTTTTCGATATAATAATGTT	TGCAGTCTGTTGAGGAAGTGAGACAAAAATTACGCACAAAAACTAACTATTTTTCGATATAATAATGTT	chr4	273673330	1	9.88e-28	Minus	35:G>A	0	0	0	2	0	0	0	0	0	0	0	0	2	0	0	-	0	0	0	0	0	0	0	0	0	2	0	0	0	2	0	0	0	0	0	0	0	2	0	0
D02852	32610557	TGCAGTGAGTCTCTTAGGTGCAGGAAATGGAACAATAAGTTCAGGTCTAAGTTGGTTCTTTTGGCTTGT	TGCAGTGAGTCTTTTAGGTGCAGGAAATGGAACAATAAGTTCAGGTCTAAGTTGGTTCTTTTGGCTTGT	chr1S	772540453	1	9.88e-28	Minus	12:C>T	0	0	0	0	0	0	-	0	-	0	0	0	0	0	-	0	0	0	-	0	0	0	0	0	2	0	0	0	0	0	0	0	-	-	-	0	0	0	-	-
D02853	32610557	TGCAGTGAGTCTCTTAGGTGCAGGAAATGGAACAATAAGTTCAGGTCTAAGTTGGTTCTTTTGGCTTGT	TGCAGTGAGTCTCTTAGGTGCAGGAAATGGAACAATAAGTTCAGCTCTAAGTTGGTTCTTTTGGCTTGT	chr1S	772540421	1	9.88e-28	Minus	44:G>C	0	0	0	0	0	0	-	0	-	0	0	0	0	0	-	0	0	0	-	0	0	0	0	0	0	0	0	0	0	0	0	0	-	-	-	0	0	2	-	-
D02869	3519221	TGCAGTGCCTTCTCAGTTGCATTTGCTAAAGCAAGATCTTCTTGTTCGTCTTCAACATTTTCTGATGAG	TGCAGTGCCTTTTCAGTTGCATTTGCTAAAGCAAGATCTTCTTGTTCGTCTTCAACATTTTCTGATGAG	chr3	1362704907	1	4.6e-26	Minus	11:C>T	0	0	0	2	0	2	0	0	0	0	0	2	1	0	0	0	0	0	0	-	-	0	1	0	-	0	0	0	0	0	0	0	-	0	0	0	0	0	0	0
D02886	39974560	TGCAGTGGTCTGGGAGTTTGTAATCGAGAGTTGGGACAATGTCGATGCTTTCATGGTTATGCTGGTTAG	TGCAGTGGTCTGGGAGTTTGTAATCGCGAGTTGGGACAATGTCGATGCTTTCATGGTTATGCTGGTTAG	chr3	127241845	1	9.88e-28	Minus	26:A>C	0	0	-	0	0	0	0	-	-	0	0	0	0	0	0	1	0	0	-	0	0	2	0	0	0	0	0	0	0	0	0	0	0	0	0	0	0	0	0	-
D02893	39974577	TGCAGTGTCAGCCCTTGGTGTTCTGGTCTCTTTTGAAGCTGCTTTAGAATTTCTACTTTAGGACTGTAG	TGCAGTGTCAGCCCTTGGTGTTCTGGTCTCTTTTGAAGCTGCTTTAGAATTTCTACTTTAGGACTGTAA	chr5	430916757	1	9.88e-28	Minus	68:G>A	2	0	0	0	0	0	0	0	0	0	0	0	0	-	0	0	0	0	-	0	0	0	0	0	0	0	0	0	0	0	0	0	0	-	0	0	0	0	0	0
D02894	22856933	TGCAGTGTCTGATGACATTGCTAATTCCAAAAGTTCCAATAATTTTTCATCTGAAACAACTCCCACCTG	TGCAGTGTCTGATGACATCGCTAATTCCAAAAGTTCCAATAATTTTTCATCTGAAACAACTCCCACCTG	chr6	3991601	1	9.88e-28	Plus	18:T>C	0	0	0	0	0	0	0	2	0	0	0	0	2	0	0	1	0	0	0	0	0	0	0	0	0	0	0	0	0	0	0	0	0	2	-	0	2	0	-	-
D02896	3523940	TGCAGTGTGTGCCTTTGTGAGGATCTCCTTGTACCTATTCCTAAATGCAGACAACAACAGAACCCCGAT	TGCAGTGTGTGCCTTTGTGAGAATCTCCTTGTACCTATTCCTAAATGCAGACAACAACAGAACCCCGAT	chr2	449428865	1	9.88e-28	Minus	21:G>A	0	0	-	-	0	2	0	0	0	0	-	0	0	0	0	0	0	0	0	0	0	0	0	-	0	0	0	-	0	0	0	0	0	1	-	0	0	0	0	0
D02904	39978022	TGCAGTTACTACATCATCTGATTCAATCACCACAACATCTACATGCACCTGCACAAACAATAGTATAAG	TGCAGTTACTACATCATCTGATTCAATCACCACAACATCTACATGCACCTGCACAAACAAGAGTATAAG	chr2	12095686	1	9.88e-28	Minus	60:T>G	0	-	0	0	0	0	0	0	0	0	0	0	0	0	-	0	0	0	0	0	0	0	0	0	0	0	0	-	0	0	0	0	-	0	0	0	0	0	0	-
D02910	13866751	TGCAGTTAGGGGTGTGAAAAGTTAGTTATTTTTAGAAATCAAATTATAATCATTTTCAAATTATTTACA	TGCAGTTAGGGGTGTGAAAAGTTAGTTATTTTTAGAAATAAAATTATAATCATTTTCAAATTATTTACA	chr4	307450621	1	1.28e-26	Plus	39:C>A	0	-	0	0	0	0	0	0	0	0	0	0	0	-	0	0	0	1	0	-	-	0	0	0	0	0	0	-	1	0	0	0	0	-	0	0	0	0	0	0
D02926	39979906	TGCAGTTCAGATTACCATCAATTGTCTCTCTAAGGTTTCTAGTAAGCGTCCTTCAATAGAGGATGTTCT	TGCAGTTCAGATTACCATCAATTGTCTCTCTAAGATTTCTAGTAAGCGTCCTTCAATAGAGGATGTTCT	chr4	21205106	1	9.88e-28	Minus	34:G>A	0	0	0	0	0	0	0	0	-	0	-	0	0	0	0	0	0	0	0	0	0	0	0	0	0	0	0	0	0	0	0	0	0	0	0	-	0	0	0	0
D02940	32608636	TGCAGTTCTTCTTTCTTTGCTCCAACCACTTTGCCCAAAATCGTTCCTTCTTTCACAAACACAAATGTT	TGCAGTTCTTCTTTCTTTGCTCCAACCACTTTGCCCAAAATCGTTCCTTCTTTCACAAAGACAAATGTT	chr1L	1026619321	1	9.88e-28	Plus	59:C>G	0	0	0	0	0	0	0	-	0	0	-	-	2	-	0	-	0	0	0	0	0	-	0	0	0	0	0	0	0	0	0	0	0	-	0	-	0	-	0	0
D02941	39979330	TGCAGTTCTTTCTAAAGATAGGAAACACCTAATAAACAATTAGGGTGTCAAAATGGAAAACATCTAAAA	TGCAGTTCTTTCTAAAGATAGGAAACACCTAATAAACAATTAGGGTGTCAAAATGGAAAACGTCTAAAA	chr4	1099092407	1	9.88e-28	Minus	61:A>G	0	0	0	0	0	0	0	0	0	-	0	0	0	-	0	0	0	0	0	0	0	0	0	0	0	0	0	0	0	0	0	0	-	0	-	0	0	0	-	-
D02953	3507915	TGCAGTTGCAATTTCTATTCATAAAGCACTATTGCTTACTCACACCTATAAAGAAGCAAATATTCAAAA	TGCAGTTGCAATTTCTATTCATAAAGCACTATTGCGTACTCACACCTATAAAGAAGCAAATATTCAAAA	chr1L	1630647918	1	9.88e-28	Minus	35:T>G	0	0	0	0	0	0	0	0	0	0	0	0	0	0	0	-	0	0	0	-	0	0	0	0	0	-	0	-	0	0	0	1	0	-	0	0	0	1	0	1
D02958	39967892	TGCAGTTGCATTTATCAGAAGATTTTCATTACTTGCAAAAATCCAAAAAGAAGTGATACTGAGAACACA	TGCAGTTGCATTTATCAGAAGATTTTCATTACTTACAAAAATCCAAAAAGAAGTGATACTGAGAACACA	chr3	659633553	1	9.88e-28	Minus	34:G>A	0	0	0	0	0	0	0	0	0	0	0	0	0	0	0	0	0	0	0	0	0	0	0	0	0	0	-	0	0	0	0	0	0	0	0	0	0	0	0	0
D02961	3522807	TGCAGTTGCGGTAATCCTAAAAGTTGCCTGAAATCATATACAACCTTTCAGTCACTGAGCGAAACTAAA	TGCAGTTGCGGTAATCCTAAAAGTTGCCTGAAATCATATACAACCTTTCAGTCACTGAGCAAAACTAAA	chr6	284648594	1	9.88e-28	Minus	60:G>A	0	-	0	0	0	0	0	0	-	0	-	0	0	-	0	0	0	0	0	0	0	0	0	0	0	0	0	0	0	0	0	0	2	0	0	0	0	0	1	1
D02964	3519127	TGCAGTTGGCAGAATTTCATGCTAAAGCTGTAGTTTATGTCAAACCTAAAAGACCATCCACAAAAGAAA	TGCAGTTGGCAGAATTTCATGCTAAAGCTGTAGTTTATGTCAAACCTAAAAGACCATCTACAAAAGAAA	chr3	1361208934	1	9.88e-28	Plus	58:C>T	0	0	0	-	0	0	0	0	0	0	0	0	0	0	0	0	0	0	-	0	0	0	0	-	0	-	0	0	0	0	0	0	-	0	0	-	0	0	0	0
D02981	3519195	TGCAGTTTCCTCCAATCCCAACACAGTCCAATTTACCTTCTGTTCATACTGTTGTAACTTCACATACTG	TGCAGTTTCCTCCAATCCCAACACAGTCCAATTTATCTTCTGTTCATACTGTTGTAACTTCACATACTG	chr6	1053544938	1	9.88e-28	Minus	35:C>T	0	0	-	0	0	0	0	0	0	0	0	0	0	0	0	0	0	0	0	0	0	0	0	0	0	0	0	0	0	0	0	0	0	0	0	0	-	0	0	2
D02983	39971983	TGCAGTTTCTAGTGCAATGGTGTGACTTACAGCAGTATCACTTTCGAAGAATTTCACAATTTGATCAAT	TGCAGTTTCTAGTGCAATGGTGTGACTTACAACAGTATCACTTTCGAAGAATTTCACAATTTGATCAAT	chr1L	1157876764	1	9.88e-28	Plus	31:G>A	0	0	0	0	0	0	0	-	0	0	0	0	0	0	0	0	0	0	-	0	0	0	0	0	0	0	-	-	0	0	0	0	0	-	0	0	0	0	0	0
D02995	39968101	TGCAGTTTTGCATGCGATGTCTAAACTGTAACTTCTTAGTTTTTTTGGTATTGAAATGTTTTACTAGCA	TGCAGTTTTGCAAGCGATGTCTAAACTGTAACTTCTTAGTTTTTTTGGTATTGAAATGTTTTACTAGCA	chr6	789733284	1	9.88e-28	Minus	12:T>A	0	0	0	-	0	0	0	-	0	0	-	0	-	0	0	-	0	0	-	0	0	0	0	0	0	0	-	0	0	0	0	0	0	-	0	-	0	0	0	0
D02999	3521022	TGCAGTTTTTACAGCATCCAACAAGAAGTCCAACTCCCACTATTTCTCCCACACTGAATCTGCTAACAT	TGCAGTTTTTACAGCACCCAACAAGAAGTCCAACTCCCACTATTTCTCCCACACTGAATCTGCTAACAT	chr3	1085056436	1	9.88e-28	Minus	16:T>C	0	-	0	-	0	0	0	0	-	1	0	2	0	-	0	2	0	2	0	0	0	2	0	1	0	0	0	1	0	0	-	0	0	-	0	-	0	0	2	2
D03076	13904400	TGCAGAGAAAGACCCCTGAAACAACTGAAAGGTCCATTTCTTTTTACCTGCTTCATTTGCGTACTAAGG	TGCAGAGAAAGACCCCTGAAATAACTGAAAGGTCCATTTCTTTTTACCTGCTTCATTTGCGTACTAAGG	chr6	1317119042	1	9.88e-28	Minus	21:C>T	0	0	0	-	0	0	0	0	0	0	0	2	0	-	0	-	0	1	0	0	-	0	0	0	0	0	-	-	-	0	0	0	-	-	0	0	0	1	0	0
D03080	39972510	TGCAGAGAATGTGCAACAACTCTGATAAGTATGTTATAAGTTTATAACTACACTCCAGGCATCCTCTAA	TGCAGAGAATGTGCAACAACTCTGATAAGTATGTTATAAGTTTATAGCTACACTCCAGGCATCCTCTAA	chr3	531892384	1	9.88e-28	Minus	46:A>G	0	-	0	0	0	0	0	0	0	0	-	0	0	0	0	0	0	0	1	0	2	-	0	1	0	0	0	0	0	0	0	0	-	0	0	0	0	0	0	2
D03081	39963161	TGCAGAGACCCGTGCCACTGGGGTAGCAGTGACCTGACCATTAGTTTGCCACGCCCAAATGGGGAGTCC	TGCAGAGACCCGTGCCACTGGGGTGGCAGTGACCTGACCATTAGTTTGCCACGCCCAAATGGGGAGTCC	chr6	231692850	1	9.88e-28	Plus	24:A>G	0	0	0	0	0	0	0	-	0	0	0	0	-	-	-	0	0	0	0	0	0	0	0	0	0	0	0	0	0	0	0	0	-	0	0	0	0	0	0	0
D03091	3525988	TGCAGAGGCGATTGCCTAAACAAGGAGATGGTAAAGAGTATCTTGGCGGTCAAAATGATAACGAAGCTG	TGCAGAGGCGATTGCCTAAACAAGGAGATGGTAAAGAGTATCTTGGCGGTCAAAATGATAATGAAGCTG	chr3	440425593	1	9.88e-28	Plus	61:C>T	0	0	0	0	0	0	-	0	0	0	0	0	0	-	0	0	0	0	0	0	0	0	0	-	0	-	0	0	0	0	0	0	0	0	0	-	0	0	0	0
D03186	13904640	TGCAGCCTCTGGTGAATGGGATTTGTTCCTTCTTCCATTCTACCATACCAAAAAGTTTATCATCAAGCT	TGCAGCCTCTGGTGAATGGGATTTGTTCCTTCTTCCATTCTACCATACCAAAAAGTTTATCGTCAAGCT	chr1L	1214993191	1	9.88e-28	Minus	61:A>G	0	-	0	0	0	0	0	-	0	0	-	0	0	0	0	0	2	0	0	0	0	0	0	-	0	-	0	-	0	0	0	2	0	0	0	0	0	0	0	0
D03195	39979823	TGCAGCTAAGCATCATACTGTTATTGCTACTCAGGGCGGCGAAGTGTTCACTTGGGGATCCAATCGAGG	TGCAGCTAAGCATCATACTGTTATTGCTACTCAGGGTGGCGAAGTGTTCACTTGGGGATCCAATCGAGG	chr5	624908851	1	9.88e-28	Minus	36:C>T	0	0	0	0	0	0	0	-	-	0	0	0	0	0	0	-	0	0	0	-	-	0	0	0	0	0	0	-	0	0	0	0	-	0	0	0	0	0	0	0
D03224	3516346	TGCAGGATACTATGTAGTGCTTCCTGATTTTTTATACGGATATCCTCTTACTTCTGAGAATGCTAACAG	TGCAGGATACTATGTAGTGCTTCCTGATTTTTTATACGGAGATCCTCTTACTTCTGAGAATGCTAACAG	chr4	1286039734	1	9.88e-28	Plus	40:T>G	0	0	0	0	0	0	0	0	0	0	0	0	0	0	-	0	1	0	0	0	-	0	0	-	-	0	0	0	0	0	0	0	0	0	0	0	0	0	0	-
D03251	3530589	TGCAGGTTTTTTTTGCCATAACTTTCAATATCTGATTCCTTTCTCACTCTAACACTACTGCTTTTGGAA	TGCAGATTTTTTTTGCCATAACTTTCAATATCTGATTCCTTTCTCACTCTAACACTACTGCTTTTGGAA	chr3	931755874	1	9.88e-28	Plus	5:G>A	0	0	0	0	0	0	0	0	0	-	-	0	0	-	0	-	-	0	0	-	-	0	0	0	0	-	0	-	0	0	0	0	1	0	0	-	-	0	0	0
D03284	22857459	TGCAGTCAATGGAGAGGTTTTCATTCTTCGAACTGCCTATGGAGAAAAAATTTCAGGTAAATAGTGTAA	TGCAGTCAATGGAGAGGTTTTCATTCTTCGAACTGCCTATGGAGAAAAATTTTCAGGTAAATAGTGTAA	chr1L	1594680480	1	9.88e-28	Plus	49:A>T	0	0	0	0	0	2	0	1	0	2	-	0	0	-	0	0	0	0	0	0	0	2	0	0	0	0	0	0	0	1	0	0	0	0	-	0	0	0	0	-
D03295	39974483	TGCAGTGACCATTGCAGGGTTGACCGGTCCGATTTCGGAGGAAACTTTGGCAGATTGAGAAGGACACCA	TGCAGTGACCATTGCAGGGTTGACTGGTCCGATTTCGGAGGAAACTTTGGCAGATTGAGAAGGACACCA	contig_6096	203449	1	9.88e-28	Plus	24:C>T	0	0	0	0	0	0	0	2	-	0	0	-	0	0	0	0	0	0	0	0	0	0	-	0	0	0	0	0	0	0	0	0	0	0	0	0	0	0	0	-
D03310	39974640	TGCAGTTATAAAGTTACATCAGAAGAAAGAAAAACTATATGTGATATAGAACTAAAACTAAACAGTTTA	TGCAGTTATAAAGTTACATCAGAGGAAAGAAAAACTATATGTGATATAGAACTAAAACTAAACAGTTTA	chr1L	1243843739	1	9.88e-28	Minus	23:A>G	0	0	0	0	2	-	0	0	0	0	0	0	0	1	0	-	0	0	0	0	0	0	0	0	0	-	0	0	0	0	-	0	0	-	-	0	0	0	0	0
D03341	39972240	TGCAGAAGCAAGAGACTTGTGTGAAAAACTTATAAAACGCCTGCATGGAGGCACTGATGTTACTTCGCG	TGCAGAAGCAAGAGACTTGTGTGAAAAACTTATAAAACGCCTGCATGGAGGCACTGATGTTACTTCACG	chr1S	101460937	1	9.88e-28	Plus	66:G>A	0	0	-	0	0	0	0	0	-	0	0	0	0	0	0	-	0	0	0	0	0	-	-	0	0	0	0	-	0	0	-	0	-	2	0	0	0	-	0	-
D03343	39972325	TGCAGAATAGGTCATTCAAAATTTATCAGAATAGCAATAGTGATCTACCCACACGCTATAATATTTCAG	TGCAGAATAGGTCATTCAAAATTTATCAGAATAGTAATAGTGATCTACCCACACGCTATAATATTTCAG	chr4	1580177344	1	9.88e-28	Minus	34:C>T	0	0	0	0	0	0	0	0	-	0	0	0	0	0	-	-	0	0	0	0	-	0	0	0	0	-	0	0	0	0	0	0	0	-	0	0	0	0	0	0
D03349	39963925	TGCAGACCACTATTTGCCAGTAGTTTATTAGGGATCATCCGGACTCTTTTTGAGCAAACTCGAGCAGAT	TGCAGAGCACTATTTGCCAGTAGTTTATTAGGGATCATCCGGACTCTTTTTGAGCAAACTCGAGCAGAT	chr1S	190468972	1	9.88e-28	Plus	6:C>G	0	0	0	0	0	0	0	0	0	0	0	-	0	0	0	0	0	-	0	0	0	0	0	0	0	0	0	0	0	0	0	0	0	0	0	0	0	-	0	0
D03374	39977397	TGCAGCAGTCCACTCCTCAACCTTCCACTTCTGTTTGAAGGAAACGCAGTAGCTCTAAGATCAGCCGGT	TGCAGCAATCCACTCCTCAACCTTCCACTTCTGTTTGAAGGAAACGCAGTAGCTCTAAGATCAGCCGGT	chr3	22353080	1	9.88e-28	Minus	7:G>A	0	0	0	0	0	0	0	0	0	0	0	0	0	-	0	-	0	0	0	0	0	0	0	0	0	0	-	0	0	0	0	0	-	0	0	0	0	0	0	-
D03385	32610930	TGCAGCCGAACATAGGGTGCTAATATTCATTTTCACATTCAAATAACATATAAAAAAGACTAATAGATT	TGCAGCCGAACATATGGTGCTAATATTCATTTTCACATTCAAATAACATATAAAAAAGACTAATAGATT	chr4	197151105	1	9.88e-28	Plus	14:G>T	0	0	0	0	0	-	0	0	0	2	0	0	0	1	-	-	0	0	0	0	0	0	0	0	0	-	0	0	0	2	0	0	0	-	1	0	0	0	0	-
D03408	13904777	TGCAGGATCTCGTAGGCATTCAAAAGGGGTCCAAACTTAGATCCAGATGCCTTGACTAAGGTTATATTG	TGCAGGATCTCATAGGCATTCAAAAGGGGTCCAAACTTAGATCCAGATGCCTTGACTAAGGTTATATTG	chr1L	879512577	1	9.88e-28	Plus	11:G>A	0	0	0	0	0	0	0	2	-	0	0	0	0	-	-	0	0	0	-	0	0	0	0	0	0	2	-	0	0	0	0	0	0	0	0	0	0	0	0	-
D03423	3513415	TGCAGTAATAAAAGCCTGTCACATTTTCATGCCTTTTCATATTTCCGTATTTACTATTATTTCTCTCAA	TGCAGTAATAAAAGCCTGTCACGTTTTCATGCCTTTTCATATTTCCGTATTTACTATTATTTCTCTCAA	chr1L	865054366	1	9.88e-28	Plus	22:A>G	0	0	-	1	0	0	0	0	1	0	-	2	0	0	0	0	0	0	-	0	-	0	0	0	0	0	-	0	0	0	0	0	-	0	2	-	0	0	0	0
D03442	3521477	TGCAGAGGAAAAAACATTTTCCCAGACACACATCAACCGTCAACTATTCAACAAAGAACATCCTCTCCA	TGCAGAGGAAAAAACATTTTCCCAGACACACATCAACCGTCAACTATTCAACAAAGAACATCCTCTCCG	chr1S	1524822268	1	9.88e-28	Plus	68:A>G	0	0	0	0	0	0	0	0	0	0	0	0	0	-	0	0	0	0	0	0	0	0	0	0	0	-	0	-	0	0	0	0	0	0	0	0	0	0	-	0
D03651	3523537	TGCAGAAAATCATATACAGTTTGCATTCAAAATACAAGTATAATAATTTACAGATCGGAAGAGCGGTTC	TGCAGAAAATCATATACAGTTTGCATTCAAAATATAAGTATAATAATTTACAGATCGGAAGAGCGGTTC	chr3	533383755	1	2.11e-17	Minus	34:C>T	0	-	0	-	0	0	0	0	-	0	0	0	0	0	0	-	0	0	0	0	0	0	0	0	0	0	0	-	0	0	0	-	0	1	2	0	0	0	0	0
D03652	39968182	TGCAGAAAATCGAAAGAAAGTGCAAGTAAGAAACTTACCTTTATATTACAGATCGGAAGAGCGGTTCAG	TGCAGAAAATCGAAAGAAAGTGCAAGTAAGAAAGTTACCTTTATATTACAGATCGGAAGAGCGGTTCAG	chr1S	1059606192	1	2.5e-16	Plus	33:C>G	0	0	0	0	0	0	0	0	0	-	0	0	0	0	0	0	0	-	-	0	-	0	0	0	0	-	0	0	0	0	0	0	0	0	0	0	0	0	0	-
D03661	22857043	TGCAGAAACCTCTGCTCTTACACTGCTATTGCGTCCACTCTGATTATGTAAATGTTTACAGATCGGAAG	TGCAGAAACCTCTGCTCTTACACTGCTATTGCGTCCACTCTGATTATATAAATGTTTACAGATCGGAAG	chr4	239541401	1	9.73e-22	Minus	47:G>A	2	1	1	-	1	1	1	1	1	1	1	1	1	1	1	1	1	1	1	1	1	1	2	-	1	1	1	1	1	1	1	1	1	1	-	-	1	0	-	1
D03663	39968208	TGCAGAAACTATATGAATTAGGGGCTCGAAAATTTGGGATATTACAGATCGGAAGAGCGGTTCAGCAGG	TGCAGAAACTATATGAGTTAGGGGCTCGAAAATTTGGGATATTACAGATCGGAAGAGCGGTTCAGCAGG	chr4	729621127	1	3.42e-14	Plus	16:A>G	0	-	0	-	0	0	0	0	0	0	0	0	0	0	1	-	-	0	0	-	1	0	0	0	0	0	0	0	0	0	0	0	0	0	0	0	0	0	0	0
D03669	13905736	TGCAGAAAGGGCAAAGCCCTAAGTTCTTTACAGATCGGAAGAGCGGTTCAGCAGGAATGCCGAGACCGA	TGCAGAAAGGGAAAAGCCCTAAGTTCTTTACAGATCGGAAGAGCGGTTCAGCAGGAATGCCGAGACCGA	chr2	1192848733	1	5.77e-07	Plus	11:C>A	-	1	0	1	0	0	-	0	-	-	0	-	0	0	0	0	0	0	0	0	0	0	0	-	0	0	0	2	0	0	2	2	0	0	0	0	0	-	0	-
D03671	3525618	TGCAGAAATACATTGCAAACCACTATTTTACAGATCGGAAGAGCGGTTCAGCAGGAATGCCGAGACCGA	TGCAGAAATACACTGCAAACCACTATTTTACAGATCGGAAGAGCGGTTCAGCAGGAATGCCGAGACCGA	chr5	992670147	1	5.77e-07	Minus	12:T>C	0	0	1	0	0	0	0	0	0	0	0	0	0	0	0	0	0	0	0	0	0	2	0	0	0	0	0	-	0	0	2	1	0	0	0	0	0	0	0	0
D03686	39978258	TGCAGAACCCTTCAATATGAAATCAATTACAGATCGGAAGAGCGGTTCAGCAGGAATGCCGAGACCGAT	TGCAGAACCCTTCAATATGAAATCTATTACAGATCGGAAGAGCGGTTCAGCAGGAATGCCGAGACCGAT	chr1S	333383452	1	2.07e-06	Minus	24:A>T	-	0	0	-	0	0	0	0	1	0	-	0	0	0	0	-	0	0	0	0	0	0	0	0	0	-	0	-	0	0	0	0	-	0	0	0	0	0	0	0
D03688	3528782	TGCAGAACCGAAAGAAAAGGAAAAAGAGGAAGACGTTACAGATCGGAAGAGCGGTTCAGCAGGAATGCC	TGCAGAACCGAAAGAAAAGGAAAAAGAGGAAGATGTTACAGATCGGAAGAGCGGTTCAGCAGGAATGCC	chr1S	1371963487	1	4.94e-11	Minus	33:C>T	0	0	0	2	0	0	0	0	0	-	0	0	0	-	-	-	0	0	0	0	0	0	0	-	0	0	0	-	0	0	-	2	-	0	0	0	0	-	0	0
D03697	39978262	TGCAGAAGACAGTAAATTGACTAGTGAGTCCGTTCTCACATTACATTACAGATCGGAAGAGCGGTTCAG	TGCAGAAAACAGTAAATTGACTAGTGAGTCCGTTCTCACATTACATTACAGATCGGAAGAGCGGTTCAG	chr1S	35487434	1	2.5e-16	Minus	7:G>A	0	0	0	0	0	0	0	0	0	0	0	0	0	-	0	0	0	0	0	-	0	0	0	0	0	0	0	-	0	0	0	0	-	0	0	0	0	0	0	0
D03708	3515054	TGCAGAAGTGGTGAAGTTTATTCATACAAAATTTTACAGATCGGAAGAGCGGTTCAGCAGGAATGCCGA	TGCAGAAGTGGTGAAGTTTATTCATACAAATTTTTACAGATCGGAAGAGCGGTTCAGCAGGAATGCCGA	chr2	170737415	1	5.86e-10	Plus	30:A>T	0	0	0	0	0	0	2	0	0	0	0	0	0	0	0	-	0	0	0	0	-	0	0	0	0	0	0	-	0	0	0	0	0	0	0	0	0	0	0	-
D03710	22857518	TGCAGAAGTTCATATCCAGCATTGATAAAAACCAAAAGAAATTTTTTACAGATCGGAAGAGCGGTTCAG	TGCAGATGTTCATATCCAGCATTGATAAAAACCAAAAGAAATTTTTTACAGATCGGAAGAGCGGTTCAG	chr1L	1677378501	1	4.19e-14	Plus	6:A>T	2	0	0	0	0	0	0	0	0	0	0	0	0	0	0	0	0	0	0	0	-	0	0	-	0	0	0	-	0	0	0	-	0	-	0	0	2	0	0	-
D03722	3518332	TGCAGAATCTCCCCCGACAAAGAATTTCAACCCATTACAGATCGGAAGAGCGGTTCAGCAGGAATGCCG	TGCAGAATCTCCCGCGACAAAGAATTTCAACCCATTACAGATCGGAAGAGCGGTTCAGCAGGAATGCCG	chr4	363081487	1	1.63e-10	Plus	13:C>G	0	0	-	0	0	0	0	1	0	0	0	-	0	-	0	0	0	-	-	-	0	0	-	0	0	0	0	0	0	0	0	0	0	0	-	0	0	-	0	-
D03730	39968439	TGCAGAATTTCTCAACAACAGTAGTTTATATTATTACAGATCGGAAGAGCGGTTCAGCAGGAATGCCGA	TGCAGAATTTCTCAACAACAACAGTTTATATTATTACAGATCGGAAGAGCGGTTCAGCAGGAATGCCGA	chr5	313726508	1	5.86e-10	Plus	20:G>A	0	0	0	0	-	0	0	1	0	0	-	0	0	0	-	0	0	0	0	-	0	0	0	0	-	-	0	-	0	0	0	0	0	0	0	0	0	0	0	0
D03746	39975399	TGCAGACGCCATATCTGTGAAATGCATTACAGATCGGAAGAGCGGTTCAGCAGGAATGCCGAGACCGAT	TGCAGACGCCATATCTGTGAAATGTATTACAGATCGGAAGAGCGGTTCAGCAGGAATGCCGAGACCGAT	chr1L	385136626	1	2.07e-06	Minus	24:C>T	0	0	0	0	0	0	0	0	0	0	0	0	0	-	2	0	0	0	0	0	0	0	0	0	0	0	0	0	0	0	0	0	0	0	0	0	0	0	0	0
D03748	39968513	TGCAGACTCTGTAGCAATATCAAAAATATTGTTACAGATCGGAAGAGCGGTTCAGCAGGAATGCCGAGA	TGCAGACTCTGTAGCAATATAAAAAATATTGTTACAGATCGGAAGAGCGGTTCAGCAGGAATGCCGAGA	chr1L	1519683058	1	6.2e-09	Plus	20:C>A	0	2	-	0	0	0	0	0	0	0	0	0	0	1	-	0	0	0	0	0	-	0	-	0	0	-	0	-	0	0	0	0	0	0	0	-	0	-	0	0
D03759	13912397	TGCAGAGAAAGATCAGTATTGAGCATCAAAATCAATTACAGATCGGAAGAGCGGTTCAGCAGGAATGCC	TGCAGAGAAAAATCAGTATTGAGCATCAAAATCAATTACAGATCGGAAGAGCGGTTCAGCAGGAATGCC	chr4	409971734	1	4.94e-11	Plus	10:G>A	0	0	-	0	0	0	0	0	0	0	0	0	0	0	0	0	0	0	0	0	0	-	0	0	0	0	0	-	0	1	0	0	0	0	0	0	0	0	0	0
D03764	39975423	TGCAGAGAATCACCATCAAGGAAATCAAGTCTCATGCATGGTTTTTACAGATCGGAAGAGCGGTTCAGC	TGCAGCGAATCACCATCAAGGAAATCAAGTCTCATGCATGGTTTTTACAGATCGGAAGAGCGGTTCAGC	chr1L	1792591186	1	8.59e-16	Minus	5:A>C	0	0	0	0	0	0	0	0	0	-	0	0	0	0	0	0	0	0	0	0	-	0	0	0	0	0	0	0	0	0	0	0	0	0	0	0	-	0	0	0
D03770	13911084	TGCAGAGAGCATCTTTTCATTATGACTTTGTTTTACAGATCGGAAGAGCGGTTCAGCAGGAATGCCGAG	TGCAGAGAGCATATTTTCATTATGACTTTGTTTTACAGATCGGAAGAGCGGTTCAGCAGGAATGCCGAG	chr5	14407601	1	1.92e-09	Minus	12:C>A	0	0	0	0	0	0	0	0	-	0	-	0	0	0	1	0	0	0	0	0	0	0	0	0	0	-	0	0	0	0	2	0	-	0	0	0	0	0	0	0
D03794	13912743	TGCAGAGTAGAATCTTCCAAGGAAACTTTTACAGATCGGAAGAGCGGTTCAGCAGGAATGCCGAGACCG	TGCAGAGTAGAACCTTCCAAGGAAACTTTTACAGATCGGAAGAGCGGTTCAGCAGGAATGCCGAGACCG	chr5	533794170	1	1.92e-07	Plus	12:T>C	0	0	0	0	0	0	0	0	-	2	0	0	0	0	0	0	0	0	0	2	0	0	0	0	0	0	0	-	0	2	0	0	0	0	0	0	0	0	0	0
D03796	39975508	TGCAGAGTCGTATGCGATGGAATTGAGTGATATTATATTGTTTGGATCATTTACAGATCGGAAGAGCGG	TGCAGAGTCGTAAGCGATGGAATTGAGTGATATTATATTGTTTGGATCATTTACAGATCGGAAGAGCGG	chr1S	636750957	1	4.91e-19	Minus	12:T>A	0	-	-	0	0	0	0	0	0	0	0	0	0	0	-	-	0	0	0	0	0	0	0	0	0	0	0	0	0	0	0	-	0	0	0	-	0	0	0	0
D03806	3526940	TGCAGATAAAGGTTTGTTGTGAATATACTAGAAGAAAAGGACAACAATTTACAGATCGGAAGAGCGGTT	TGCAGATAAAAGTTTGTTGTGAATATACTAGAAGAAAAGGACAACAATTTACAGATCGGAAGAGCGGTT	chr3	340581254	1	5.87e-18	Minus	10:G>A	0	0	0	0	0	0	0	0	0	0	-	-	0	0	0	0	0	0	0	0	0	0	0	0	0	0	0	-	0	0	0	0	0	0	0	0	0	0	0	0
D03813	39975567	TGCAGATATTTCCGAATTCTGATTCATTACAGATCGGAAGAGCGGTTCAGCAGGAATGCCGAGACCGAT	TGCAGATATTTCTGAATTCTGATTCATTACAGATCGGAAGAGCGGTTCAGCAGGAATGCCGAGACCGAT	chr3	115652244	1	2.07e-06	Minus	12:C>T	0	2	0	0	0	0	2	0	0	0	0	0	0	-	-	0	0	-	0	0	0	0	0	0	0	0	-	-	2	0	0	0	0	0	0	0	2	2	2	0
D03819	39968740	TGCAGATCACTGTTTGTCACCATAACTTTACAGATCGGAAGAGCGGTTCAGCAGGAATGCCGAGACCGA	TGCAGATCACTGTTTCTCACCATAACTTTACAGATCGGAAGAGCGGTTCAGCAGGAATGCCGAGACCGA	chr4	1510420213	1	5.77e-07	Plus	15:G>C	0	0	0	0	0	0	0	0	0	0	0	0	0	0	0	0	0	-	0	0	0	0	0	-	0	-	0	0	0	0	0	0	0	-	0	0	0	0	0	0
D03837	3507267	TGCAGATGTTGTTGCAGCAATTGACCAGGTACATATGCTCTGATAATTACTTACAGATCGGAAGAGCGG	TGCAGATGTGGTTGCAGCAATTGACCAGGTACATATGCTCTGATAATTAGTTACAGATCGGAAGAGCGG	chr1L	663264094	1	4.91e-19	Plus	9:T>G	0	-	0	0	0	0	0	0	0	0	0	-	0	0	0	0	0	0	0	0	0	0	0	0	0	0	-	-	0	2	-	2	0	0	0	0	0	-	-	-
D03839	39975621	TGCAGATTATACCGTTACCTTTTGTCCATCTTCTCCAAGGTAATAATCATTACAGATCGGAAGAGCGGT	TGCAGATTATACCGTTACCTTTTGTCCATCTTCTCCAAGGTAATAATCGTTACAGATCGGAAGAGCGGT	chr6	324799335	1	1.7e-18	Plus	48:A>G	0	0	0	2	0	0	0	0	-	0	-	0	0	-	0	0	0	-	0	0	0	0	0	0	0	0	0	0	2	0	0	0	0	0	0	-	0	0	0	0
D03844	39975634	TGCAGATTGCTGGAATAAGATTCATGTGGGAAAATATAATACAGTCAATCAGAAAAGTTACAGATCGGA	TGCAGATTGCTGGAATAAGATTCATGTGGGAAAATATAATACAGTCAACCAGAAAAGTTACAGATCGGA	chr3	499215965	1	8.01e-23	Minus	48:T>C	0	0	0	0	0	0	-	0	0	0	-	0	0	0	-	0	0	0	0	0	0	0	0	0	0	0	-	0	0	0	-	0	0	0	-	0	0	0	0	-
D03845	32609055	TGCAGATTGGAAGTGGGAAGAAGGGAAAATATCTAAAGTTTTACAGATCGGAAGAGCGGTTCAGCAGGA	TGCAGATTGGAAGTGGCAAGAAGGGAAAATATCTAAAGTTTTACAGATCGGAAGAGCGGTTCAGCAGGA	chr4	84812653	1	1.16e-13	Plus	16:G>C	0	0	0	0	-	0	0	0	0	0	0	0	0	0	0	0	0	0	2	2	0	0	-	0	0	0	0	-	0	0	0	0	0	0	0	-	2	0	0	0
D03849	22857542	TGCAGATTTCATTCAATCTCTACAATCCTTTGTCGAAAAAAATACATTACAGATCGGAAGAGCGGTTCA	TGCAGATTTCATTCAATCTCTACAATCCTTTGTAGAAAAAAATACATTACAGATCGGAAGAGCGGTTCA	chr3	439768624	1	7.27e-17	Minus	33:C>A	0	2	0	0	0	2	0	0	0	0	0	0	0	0	0	0	0	0	0	0	0	0	0	0	0	0	0	0	0	1	2	0	0	0	2	2	0	0	0	0
D03868	39968941	TGCAGCAAGTGCAGAGAAAGAGAACATTACAGATCGGAAGAGCGGTTCAGCAGGAATGCCGAGACCGAT	TGCAGTGAGTGCAGAGAAAGAGAACATTACAGATCGGAAGAGCGGTTCAGCAGGAATGCCGAGACCGAT	chr1S	154880200	1	2.07e-06	Plus	5:C>T	0	0	0	0	0	0	0	0	0	0	0	0	0	0	-	-	0	0	0	0	0	0	0	0	0	0	0	-	0	0	0	0	0	0	0	0	0	0	0	0
D03880	3522625	TGCAGCAGAGAATGCAGTAACTGTCCCTGAAACAACAATTCCAATACACAACATTACAGATCGGAAGAG	TGCAGCAGAGAATGCAGTAACGGTCCCTGAAACAACAATTCCAATACACAACATTACAGATCGGAAGAG	chr1L	1583725916	1	1.18e-20	Plus	21:T>G	0	0	-	0	0	0	0	0	0	0	0	0	0	0	0	-	0	0	0	0	0	0	0	-	0	-	-	-	0	0	-	0	0	0	-	0	0	0	0	0
D03892	39969093	TGCAGCATCCTCAGAAGGAGACTTACTGGGGAAACGTTACAGATCGGAAGAGCGGTTCAGCAGGAATGC	TGCAGCATCCTCAGATGGAGACTTACTGGGGAAACGTTACAGATCGGAAGAGCGGTTCAGCAGGAATGC	chr3	628508932	1	1.49e-11	Minus	15:A>T	0	-	0	-	0	0	0	0	0	0	-	0	0	0	-	0	0	0	-	0	0	0	0	0	0	0	0	0	0	0	0	0	0	-	0	0	0	0	-	0
D03906	39969154	TGCAGCCACCTCTATCCTAAAACAATATGCAAGAGAAAGTGATGGATTAGAATATTACAGATCGGAAGA	TGCAGCCACCTCTATCCTAAAACAATATGCAAGAGAAAGTGATAGATTAGAATATTACAGATCGGAAGA	chr4	366896602	1	3.39e-21	Minus	43:G>A	0	0	1	0	2	0	0	0	0	0	-	0	0	0	0	0	0	0	0	-	0	0	0	0	0	0	0	0	0	0	1	-	0	0	0	0	0	0	0	0
D03920	39975853	TGCAGCGCTTATTCCGCGCGGCATAAAAGTTTTTACAGATCGGAAGAGCGGTTCAGCAGGAATGCCGAG	TGCAGCGCTTATTCCGCGCGGCATAAAACTTTTTACAGATCGGAAGAGCGGTTCAGCAGGAATGCCGAG	chr3	425942	1	1.92e-09	Plus	28:G>C	0	0	0	0	0	0	0	0	0	0	-	0	0	0	0	0	0	0	0	0	0	0	0	0	0	0	0	0	0	0	0	0	0	0	0	0	0	0	0	0
D03923	3523012	TGCAGCGTAATCCCAACCATTTGATTGTTATGATTACTTTTACAGATCGGAAGAGCGGTTCAGCAGGAA	TGCAGCGTAATCCCAACCTTTTGATTGTTATGATTACTTTTACAGATCGGAAGAGCGGTTCAGCAGGAA	chr6	1101374937	1	3.94e-13	Minus	18:A>T	1	-	0	1	0	0	0	0	0	0	-	1	0	0	0	0	0	0	0	0	0	0	0	0	0	-	-	-	0	0	0	0	0	0	-	0	0	-	0	-
D03927	39975864	TGCAGCTAAAACCAAAATTGATCCTATCCTTTACAGATCGGAAGAGCGGTTCAGCAGGAATGCCGAGAC	TGCAGCTAATACCAAAATTGATCCTATCCTTTACAGATCGGAAGAGCGGTTCAGCAGGAATGCCGAGAC	chr3	577963536	1	1.98e-08	Minus	9:A>T	0	0	0	0	0	0	0	0	0	0	0	0	0	-	0	-	0	0	-	0	-	-	0	0	0	0	0	0	0	0	0	0	-	0	0	-	0	0	0	0
D03933	13868848	TGCAGCTAGACCCCTTCCTTGCGTTGCCTTCCGTTGCTTCTAATTTTACAGATCGGAAGAGCGGTTCAG	TGCAGCTAGACCCCTTCCTTGCATTGCCTTCCGTTGCTTCTAATTTTACAGATCGGAAGAGCGGTTCAG	chr3	1317814876	1	2.5e-16	Plus	22:G>A	0	-	0	0	0	2	0	2	0	0	0	0	0	0	0	-	0	1	-	0	1	-	0	-	0	0	0	-	0	0	-	0	0	-	0	0	0	-	-	-
D03937	32610049	TGCAGCTCAGAAAACACAGGCACAGTAAATTACAGATCGGAAGAGCGGTTCAGCAGGAATGCCGAGACC	TGCAGCTCAGAAAACACAAGCACAGTAAATTACAGATCGGAAGAGCGGTTCAGCAGGAATGCCGAGACC	chr1L	1557102070	1	6.24e-08	Minus	18:G>A	0	0	0	0	0	0	0	0	0	0	0	0	0	0	-	0	0	0	0	-	0	0	0	1	0	2	0	0	0	0	0	0	1	0	0	0	0	0	-	0
D03940	18320630	TGCAGCTCTGCTGTTAGTTAGAGACCTAGAGGTACTTATTGTAAACAAAGTATATATTACAGATCGGAA	TGCAGCTTTGCTGTTAGTTAGAGACCTAGAGGTACTTATTGTAAACAAAGTATATATTACAGATCGGAA	chr6	194477634	1	2.79e-22	Plus	7:C>T	0	-	0	0	1	0	0	0	0	0	-	2	0	0	-	0	0	2	0	0	0	-	0	0	0	0	0	0	0	0	2	0	0	0	0	0	0	2	-	0
D03941	18320630	TGCAGCTCTGCTGTTAGTTAGAGACCTAGAGGTACTTATTGTAAACAAAGTATATATTACAGATCGGAA	TGCAGCTCTGCTGTTAGTTAGAGACCTAGAGGTACTTATTGTAAACAAAGTATGTATTACAGATCGGAA	chr6	194477680	1	2.79e-22	Plus	53:A>G	0	-	0	0	-	0	0	0	0	0	-	0	0	0	-	0	0	0	0	0	0	-	0	0	0	0	0	0	0	0	0	0	0	0	0	0	0	2	-	2
D03942	3529404	TGCAGCTCTTCCCACATCTTTGAAGACCTATTTATAATTATTACAGATCGGAAGAGCGGTTCAGCAGGA	TGCAGCTCTTCCCACATCTTTGAAGACCTATTTGTAATTATTACAGATCGGAAGAGCGGTTCAGCAGGA	chr1S	1316778611	1	1.16e-13	Minus	33:A>G	0	0	0	0	0	2	-	1	-	-	-	-	0	-	0	0	0	0	0	0	0	0	0	0	0	-	0	-	0	0	0	0	0	0	0	0	0	0	-	0
D03944	39969363	TGCAGCTGAAGATGCAAGATTAGCGTCTCTCATTTCACTTGATGGAATATTACAGATCGGAAGAGCGGT	TGCAGCTGAAGATGCAAGATTAGCATCTCTCATTTCACTTGATGGAATATTACAGATCGGAAGAGCGGT	chr4	620704278	1	1.7e-18	Minus	24:G>A	0	0	0	-	0	0	-	-	-	0	-	0	0	0	0	0	0	0	0	-	0	0	0	0	0	-	0	-	0	0	0	0	-	0	0	0	0	0	0	0
D03946	13911188	TGCAGCTGATATTCGCGTTCACGAGTTTTTTACAGATCGGAAGAGCGGTTCAGCAGGAATGCCGAGACC	TGCAGCTGATATCCGCGTTCACGAGTTTTTTACAGATCGGAAGAGCGGTTCAGCAGGAATGCCGAGACC	chr4	1395041909	1	6.24e-08	Plus	12:T>C	0	0	0	2	0	0	0	0	0	0	0	0	0	-	0	0	0	0	0	0	2	0	0	0	0	1	0	0	0	0	0	0	0	0	0	0	0	0	0	0
D03949	39969371	TGCAGCTGCATCTGCTGTAATTACATGAATTTTTCGTGTGGTTGTGTCATATGAAATTACAGATCGGAA	TGCAGCTGCATCTGCTGTAATTACATGAATTTTTCGTGTGGTTGTATCATATGAAATTACAGATCGGAA	contig_5925	393442	1	2.79e-22	Minus	45:G>A	0	0	0	0	0	0	0	0	0	0	0	0	0	0	0	0	0	0	0	0	0	0	-	0	0	0	0	0	0	0	-	0	-	0	0	2	0	0	-	-
D03969	39978541	TGCAGGACGAATTCAAAAATCAGCAACTAACTACGGCAGGGTTTTTACAGATCGGAAGAGCGGTTCAGC	TGCAGGACGAATTCAAAAATCAGCAACTAACTATGGCAGGGTTTTTACAGATCGGAAGAGCGGTTCAGC	chr4	1263192	1	8.59e-16	Plus	33:C>T	0	2	0	-	0	0	2	0	0	-	-	0	0	0	0	-	0	0	0	0	-	0	0	0	0	0	1	0	0	0	0	0	0	0	0	-	0	0	0	-
D03980	3512538	TGCAGGATAGAGAAAAAACTCATGAAAAAGAATAAACAAATAATTACAGATCGGAAGAGCGGTTCAGCA	TGCAGGATAGAGAAAAAACTCATGAAAAAGAATAAACAATTAATTACAGATCGGAAGAGCGGTTCAGCA	chr6	568212726	1	1.37e-13	Plus	39:A>T	-	0	0	0	0	0	0	0	-	-	0	-	0	0	-	0	0	0	-	0	0	0	-	0	0	0	0	-	0	0	0	0	0	0	0	0	0	0	0	0
D04013	13909725	TGCAGGGAAGGTGCATTACATTTATTAGAACCTTTACAGATCGGAAGAGCGGTTCAGCAGGAATGCCGA	TGCAGGGAAGGTGCATGACATTTATTAGAACCTTTACAGATCGGAAGAGCGGTTCAGCAGGAATGCCGA	chr1S	956604666	1	5.86e-10	Minus	16:T>G	0	-	0	0	0	0	0	1	-	0	0	0	0	0	0	-	0	-	0	0	0	0	0	0	0	0	0	-	0	0	0	0	-	0	0	0	0	0	0	-
D04024	3519684	TGCAGGGGTTCGGTCTAGGCGTGGTTGACATTTAGTCAGTTTGAAAAGTTTACAGATCGGAAGAGCGGT	TGCAGGGATTCGGTCTAGGCGTGGTTGACATTTAGTCAGTTTGAAAAGTTTACAGATCGGAAGAGCGGT	chr6	1156428617	1	1.7e-18	Minus	7:G>A	0	0	0	0	2	0	0	0	0	0	0	-	0	-	0	0	0	0	0	0	0	0	-	0	0	0	0	0	0	0	0	-	0	0	0	0	0	0	0	0
D04025	3519684	TGCAGGGGTTCGGTCTAGGCGTGGTTGACATTTAGTCAGTTTGAAAAGTTTACAGATCGGAAGAGCGGT	TGCAGGGGTTTGGTCTAGGCGTGGTTGACATTTAGTCAGTTTGAAAAGTTTACAGATCGGAAGAGCGGT	chr6	1156428614	1	1.7e-18	Minus	10:C>T	0	2	0	0	0	2	0	2	0	0	0	1	0	-	0	0	0	0	0	0	0	0	-	0	0	2	0	0	0	0	0	1	0	0	0	0	0	0	2	0
D04026	18320645	TGCAGGGTAAATAGCCCCAGGCCCCAGCCACAAATTTTACCCTATGTTTATCTTTACAGATCGGAAGAG	TGCAGGGTTAATAGCCCCAGGCCCCAGCCACAAATTTTACCCTATGTTTATCTTTACAGATCGGAAGAG	chr4	1572841611	1	1.18e-20	Plus	8:A>T	0	0	0	0	0	0	0	0	-	0	-	-	0	0	-	0	0	0	0	-	0	0	0	0	0	-	-	0	0	0	0	-	0	0	0	1	0	0	-	-
D04031	39976129	TGCAGGTAAAGAATTGCCTGAGTTCCTCAAGCACAAGTTACAGATCGGAAGAGCGGTTCAGCAGGAATG	TGCAGGTAAAGAATTGCCTGAGTTCCTCAAGCACCAGTTACAGATCGGAAGAGCGGTTCAGCAGGAATG	chr3	93350880	1	4.46e-12	Plus	34:A>C	0	0	0	0	0	0	0	0	0	0	0	-	0	0	0	-	0	-	0	0	0	0	0	0	0	0	-	0	0	0	0	0	0	0	-	0	0	-	-	0
D04032	39969715	TGCAGGTAAATGAAAGAAGCAACAAATAATATTACAGATCGGAAGAGCGGTTCAGCAGGAATGCCGAGA	TGCAGGTAAATGGAAGAAGCAACAAATAATATTACAGATCGGAAGAGCGGTTCAGCAGGAATGCCGAGA	chr6	618844231	1	6.2e-09	Plus	12:A>G	0	0	0	0	0	0	0	0	0	0	0	0	0	0	0	-	0	0	0	0	0	0	2	0	0	0	-	0	0	0	2	0	-	0	0	0	0	0	2	-
D04042	3528385	TGCAGGTCTAAGCAATAGAGAGAGATCAATGTTCTCAAGTTTTGCATTTCCATTACAGATCGGAAGAGC	TGCAGGTCTAAGTAATAGAGAGAGATCAATGTTCTCAAGTTTTGCATTTCCATTACAGATCGGAAGAGC	chr3	1338672875	1	4.09e-20	Minus	12:C>T	0	0	0	0	0	0	-	0	2	0	-	-	0	0	0	0	0	0	0	0	1	0	0	1	0	0	0	0	0	0	0	0	1	-	-	0	0	0	0	0
D04044	13869042	TGCAGGTCTTCAAGCGTCCTCATCTCTGTTTTACAGATCGGAAGAGCGGTTCAGCAGGAATGCCGAGAC	TGCAGGTCTCCAAGCGTCCTCATCTCTGTTTTACAGATCGGAAGAGCGGTTCAGCAGGAATGCCGAGAC	chr2	1150259973	1	1.98e-08	Minus	9:T>C	2	2	0	0	0	0	0	0	0	-	-	0	0	-	0	-	0	-	-	0	0	-	0	0	0	0	0	0	0	-	-	0	0	0	1	0	0	0	0	-
D04051	39979996	TGCAGGTGGTTTACACTCTGCATCCTGTGCACTAACATTATTCATTCTTGAAAGGTTACAGATCGGAAG	TGCAGGTGGTTTACACTCTACATCCTGTGCACTAACATTATTCATTCTTGAAAGGTTACAGATCGGAAG	chr6	290489539	1	9.73e-22	Minus	19:G>A	0	0	0	0	0	0	0	-	-	0	0	-	0	0	0	0	0	0	0	0	0	0	0	0	0	0	0	-	0	0	0	0	0	0	0	-	0	0	0	0
D04055	13868657	TGCAGGTTCTTCGACACCTTGGCCGTTTTACAGATCGGAAGAGCGGTTCAGCAGGAATGCCGAGACCGA	TGCAGGCTCTTCGACACCCTGGCCGTTTTACAGATCGGAAGAGCGGTTCAGCAGGAATGCCGAGACCGA	chr6	246709101	1	5.77e-07	Minus	18:T>C	0	0	-	0	0	0	0	0	0	0	-	0	0	0	0	0	0	0	0	0	0	0	0	0	0	0	0	0	0	0	-	0	0	0	0	0	0	0	0	-
D04083	39978647	TGCAGTAGTGAAAAGTCCAAACAAATTATTTGATTACAGATCGGAAGAGCGGTTCAGCAGGAATGCCGA	TGCAGTAGTGAAAAGTCCAATCAAATTATTTGATTACAGATCGGAAGAGCGGTTCAGCAGGAATGCCGA	chr5	354038644	1	5.86e-10	Minus	20:A>T	0	0	0	0	0	0	0	0	0	0	0	-	0	0	0	0	0	-	0	1	0	0	0	-	0	0	0	-	0	0	0	0	0	0	0	-	0	0	0	0
D04098	39978657	TGCAGTATGTGAGTACTCTTCTGTTTTGAAGCGATATATATCATTACAGATCGGAAGAGCGGTTCAGCA	TGCAGTATGTGTGTACTCTTCTGTTTTGAAGCGATATATATCATTACAGATCGGAAGAGCGGTTCAGCA	chr4	1597318243	1	2.94e-15	Minus	11:A>T	0	0	0	-	0	0	0	0	0	-	-	-	0	0	0	0	0	0	0	0	0	0	0	-	0	0	-	0	0	0	0	-	0	-	0	0	0	0	-	0
D04115	39970116	TGCAGTCGGAATCCAACTGGGGTAAAATCATTTCGTTACAGATCGGAAGAGCGGTTCAGCAGGAATGCC	TGCAGTCGGAATCCAACTGGGGTAAAATCATTTTGTTACAGATCGGAAGAGCGGTTCAGCAGGAATGCC	chr1S	318913199	1	4.94e-11	Minus	33:C>T	0	0	0	0	0	0	0	1	-	0	0	0	0	0	-	0	0	0	-	0	0	0	-	0	0	0	0	-	0	0	0	0	0	0	0	0	0	0	0	-
D04118	39976361	TGCAGTCTCACAATAGACAAGGTTATTACAGATCGGAAGAGCGGTTCAGCAGGAATGCCGAGACCGATC	TGCAGTCTCACAATATACAAGGTTATTACAGATCGGAAGAGCGGTTCAGCAGGAATGCCGAGACCGATC	chr1L	865703272	1	5.97e-06	Minus	15:G>T	0	0	-	0	0	0	0	0	0	2	0	-	0	-	0	0	0	0	-	1	0	0	0	0	0	0	-	-	0	0	-	0	0	0	-	0	0	0	0	-
D04136	3522291	TGCAGTGCCAAATCCATAGATGGGTCCACCAGGAAATTACAGATCGGAAGAGCGGTTCAGCAGGAATGC	TGCAGTGCCAAATCCATAGATGGGTCCACCAGAAAATTACAGATCGGAAGAGCGGTTCAGCAGGAATGC	chr4	450470707	1	1.49e-11	Minus	32:G>A	2	0	0	0	0	0	0	0	0	0	0	0	0	-	2	-	0	0	0	-	0	0	0	0	1	0	0	0	0	2	0	0	0	0	0	-	0	0	0	0
D04137	39976410	TGCAGTGCCAACTTTTCTCCATTTTTTACAGATCGGAAGAGCGGTTCAGCAGGAATGCCGAGACCGATC	TGCAGTGCCAAATTTTCTCCATTTTTTACAGATCGGAAGAGCGGTTCAGCAGGAATGCCGAGACCGATC	chr4	1500470493	1	5.97e-06	Minus	11:C>A	0	0	-	0	0	0	0	0	0	0	-	0	0	-	0	0	0	0	0	0	0	0	0	0	0	0	0	-	0	0	0	0	0	-	0	-	0	-	0	-
D04142	13869183	TGCAGTGGAATTTAGACAAGGAACACTTTACAGATCGGAAGAGCGGTTCAGCAGGAATGCCGAGACCGA	TGCAGTAGAATTTAGACAAGGAACACTTTACAGATCGGAAGAGCGGTTCAGCAGGAATGCCGAGACCGA	chr1L	1351699556	1	5.77e-07	Plus	6:G>A	0	0	0	0	0	0	1	-	2	0	-	0	0	0	0	0	0	0	-	0	0	0	-	0	0	0	0	0	0	0	0	2	0	-	0	0	0	0	-	0
D04149	32609159	TGCAGTGGTAAGCATCCCCTTTCCAATTACAGCATAAAAATAAAGCTAATTACAGATCGGAAGAGCGGT	TGCAGTGGTAAGCATCTCCTTTCCAATTACAGCATAAAAATAAAGCTAATTACAGATCGGAAGAGCGGT	contig_7087	280333	1	1.7e-18	Minus	16:C>T	2	0	0	-	0	0	0	-	0	0	0	0	0	-	0	0	0	-	0	0	0	1	0	0	0	-	0	0	0	0	0	0	0	0	0	1	0	0	0	0
D04160	3510363	TGCAGTTCAAAGATGGTGGCTAAGGTAGAAGTTTGGCTAAAGTTGTTATTATTTACAGATCGGAAGAGC	TGCAGTTCAAAGATGGTGGCTAAGGTAGAAGTTCGGCTAAAGTTGTTATTATTTACAGATCGGAAGAGC	chr1S	865783321	1	4.09e-20	Minus	33:T>C	2	0	1	2	2	0	0	0	0	0	0	1	0	-	-	0	0	0	0	0	0	0	0	0	0	-	0	-	0	0	2	1	0	0	0	0	0	-	0	-
D04166	18321203	TGCAGTTCCATTTTGATGTATGTAATAATAATGACAAAATACTTTACAGATCGGAAGAGCGGTTCAGCA	TGCAGTTTCATTTTGATGTATGTAATAATAATGACAAAATACTTTACAGATCGGAAGAGCGGTTCAGCA	contig_6506	81259	1	2.94e-15	Minus	7:C>T	-	0	0	0	0	0	0	2	0	0	0	0	0	0	0	0	0	-	0	0	0	0	0	0	0	-	0	2	0	0	0	0	0	0	0	0	0	0	0	0
D04172	13869186	TGCAGTTGCTCATTAGTTTGACTGTCTCAAAACAGGCAAGTAATTACAGATCGGAAGAGCGGTTCAGCA	TGCAGTTGCTCATTAGTTTGACTGTCTCAAAACAGGCATGTAATTACAGATCGGAAGAGCGGTTCAGCA	chr3	773852938	1	2.94e-15	Plus	38:A>T	0	0	0	0	0	2	0	0	0	-	-	0	0	0	0	-	2	0	0	0	0	-	0	0	0	-	0	-	0	0	0	0	0	-	0	-	0	0	0	0
D04179	39970432	TGCAGTTGTATCAGTGCACATGAATATCTTTCGATAAGCTGTTTTACAGATCGGAAGAGCGGTTCAGCA	TGCAGTTGTATCGGTGCACATGAATATCTTTCGATAAGCTGTTTTACAGATCGGAAGAGCGGTTCAGCA	chr1S	1036514378	1	2.94e-15	Plus	12:A>G	0	0	0	0	0	0	-	0	0	1	-	0	0	0	0	0	2	0	0	0	0	0	0	0	0	0	0	0	0	0	0	0	0	0	0	0	0	0	0	0
D04180	22857632	TGCAGTTGTATTGTAGAATTTGTCAAGGGAAAATGCTTTACAGATCGGAAGAGCGGTTCAGCAGGAATG	TGCAGTTCTTTTGTAGAATTTGTCAAGGGAAAATGCTTTACAGATCGGAAGAGCGGTTCAGCAGGAATG	chr4	1445191802	1	4.46e-12	Minus	7:G>C	0	0	0	0	0	0	0	0	0	-	0	0	0	0	0	0	0	0	0	0	-	0	0	-	1	0	0	0	0	0	0	0	-	0	0	0	0	0	-	0
D04182	39970439	TGCAGTTGTGGAATATGTCCTCAGTGGTCATCGTTTTACAGATCGGAAGAGCGGTTCAGCAGGAATGCC	TGCAGTTGTGGAATATGTCTTCAGTGGTCATCGTTTTACAGATCGGAAGAGCGGTTCAGCAGGAATGCC	chr6	1258997677	1	4.94e-11	Plus	19:C>T	0	0	0	0	0	0	-	0	0	0	0	0	0	0	0	0	0	0	0	0	0	0	0	0	0	0	0	0	0	0	0	0	0	0	0	0	0	0	-	-
D04189	39979654	TGCAGTTTCCCAATGCCAATAAAATCAAGTGATTCCTGTTATCTTCAAAATTTTACAGATCGGAAGAGC	TGCAGTGTCCCAATGCCAATAAAATCAAGTGATTCCTGTTATCTTCAAAATTTTACAGATCGGAAGAGC	chr1L	1344228470	1	4.09e-20	Plus	6:T>G	0	-	0	0	0	0	0	0	0	-	0	0	0	0	0	-	0	0	0	0	0	0	0	-	0	0	0	-	0	0	0	0	0	0	0	0	0	0	-	0
D04195	13869189	TGCAGTTTGGCAGTCAATATTGTTTCATTTTTTACAGATCGGAAGAGCGGTTCAGCAGGAATGCCGAGA	TGCAGTTTGGCAGTCAATATTGTTTCGTTTTTTACAGATCGGAAGAGCGGTTCAGCAGGAATGCCGAGA	chr2	26096962	1	6.2e-09	Minus	26:A>G	0	0	-	0	0	0	0	0	0	0	0	0	0	0	0	0	2	2	0	0	2	2	0	0	2	0	-	2	0	0	0	0	0	0	0	0	0	0	2	2
D04196	39970510	TGCAGTTTGTAAGATTCATAAATAAAGGAGAGAAAGTTACAGATCGGAAGAGCGGTTCAGCAGGAATGC	TGCAGTTTGTAAGATTCATAAATAAAGGAGATAAAGTTACAGATCGGAAGAGCGGTTCAGCAGGAATGC	chr6	625612958	1	1.49e-11	Minus	31:G>T	0	-	-	0	0	0	0	0	0	0	0	0	0	0	0	-	0	-	0	0	0	0	0	0	0	0	0	-	0	0	0	0	0	-	0	-	0	0	0	0
D04220	3506780	TGCAGAAATAGGATGAAACTCAACACTCAAGTTTTCAAATTACAGATCGGAAGAGCGGTTCAGCAGGAA	TGCAGAAATAGGATGAAAATCAACACTCAAGTTTTCAAATTACAGATCGGAAGAGCGGTTCAGCAGGAA	chr3	680642567	1	3.94e-13	Plus	18:C>A	0	0	0	0	0	0	-	0	0	0	0	0	0	0	0	0	0	0	0	0	-	-	0	-	0	0	0	0	0	0	0	0	0	0	-	-	0	0	-	-
D04280	3526869	TGCAGATTTTACCCAACTGCTAAAGAAACAAAAATTAATTACAGATCGGAAGAGCGGTTCAGCAGGAAT	TGCAGATTTTACCCAATTGCTAAAGAAACAAAAATTAATTACAGATCGGAAGAGCGGTTCAGCAGGAAT	chr3	930754617	1	1.33e-12	Minus	16:C>T	0	0	-	0	2	0	0	0	1	0	0	0	0	0	0	0	0	0	0	-	0	0	-	-	0	0	0	-	0	0	0	0	-	0	2	0	0	0	0	-
D04309	39975891	TGCAGCTCCATTTTCAACTTCCTAGAACTCACAGAATGATTACAGATCGGAAGAGCGGTTCAGCAGGAA	TGCAGCTCCATTTTCAATTTCCTAGAACTCACAGAATGATTACAGATCGGAAGAGCGGTTCAGCAGGAA	chr3	415039350	1	3.94e-13	Plus	17:C>T	0	0	0	0	0	0	0	0	0	0	-	0	0	-	0	0	2	2	0	-	0	0	-	2	0	0	0	1	0	0	0	0	0	0	0	0	0	0	0	0
D04333	39978583	TGCAGGGTGAGTGAAACTGTCCCAAATCGTTACAGATCGGAAGAGCGGTTCAGCAGGAATGCCGAGACC	TGCAGGGTGAGTGAAACTCTCCCAAATCGTTACAGATCGGAAGAGCGGTTCAGCAGGAATGCCGAGACC	chr4	427332244	1	6.24e-08	Minus	18:G>C	0	0	0	0	0	-	0	2	0	0	0	0	0	0	2	0	0	0	0	2	0	0	0	0	0	0	0	0	0	0	-	0	0	0	0	0	0	0	-	0
D04335	39978586	TGCAGGGTTGAAATGGTAAATAAAACAAACATGTCTTGTTTTGTGATTTACAGATCGGAAGAGCGGTTC	TGCAGGGTTGAAATGCTAAATAAAACAAACATGTCTTGTTTTGTGATTTACAGATCGGAAGAGCGGTTC	chr6	1175098464	1	2.11e-17	Minus	15:G>C	0	0	0	-	0	0	0	0	0	-	0	0	0	0	0	0	0	0	0	0	0	-	0	0	-	0	0	-	0	0	0	0	0	0	0	-	0	-	0	0
D04352	13905999	TGCAGTAAAGTAGTTGAACAGAGACATCTGTAGGACTTTACAGATCGGAAGAGCGGTTCAGCAGGAATG	TGCAGTGAAGTAGTTGAACAGAGACATCTGTAGGACTTTACAGATCGGAAGAGCGGTTCAGCAGGAATG	chr2	920686177	1	4.46e-12	Minus	6:A>G	0	0	0	0	0	0	0	0	0	0	0	0	0	0	0	0	0	0	-	0	0	0	0	-	0	0	0	0	0	0	0	0	0	0	0	0	0	0	-	0
D04373	13911370	TGCAGTGATGCAGGATAGTGAAAATCACAAGGAATGTCAACGTGATGCGAAGCGATTACAGATCGGAAG	TGCAGTGATGCAGGATAGTGAAATTCACAAGGAATGTCAACATGATGCGAAGCGATTACAGATCGGAAG	chr1L	816216140	1	9.73e-22	Minus	23:A>T	0	0	-	0	0	0	0	-	-	-	0	0	0	0	0	0	0	-	0	-	0	0	0	0	0	0	0	0	0	0	0	-	0	0	0	-	0	0	0	0
D04378	39970231	TGCAGTGGATTCAGTTCCATATTTTTTACAGATCGGAAGAGCGGTTCAGCAGGAATGCCGAGACCGATC	TGCAGTGGATTCAATTCCATATTTTTTACAGATCGGAAGAGCGGTTCAGCAGGAATGCCGAGACCGATC	chr6	600367471	1	5.97e-06	Plus	13:G>A	0	0	0	0	0	0	0	0	-	0	0	0	0	0	-	0	0	-	0	0	-	0	0	0	0	-	-	0	0	1	0	0	0	0	0	0	-	0	0	0
D04406	3530088	TGCAGAAAAAGGAGAAATTTGCGCAACATTACAGATCGGAAGAGCGGTTCAGCAGGAATGCCGAGACCG	TGCAGAAAAAGGAGAAATTTGTGCAACATTACAGATCGGAAGAGCGGTTCAGCAGGAATGCCGAGACCG	chr1S	1423963685	1	1.92e-07	Plus	21:C>T	0	0	0	0	0	-	0	0	0	0	-	0	0	-	-	0	0	0	0	-	0	0	0	0	0	0	0	-	0	0	0	0	-	-	-	0	0	0	0	0
D04654	65682921	TGCAGTTGGCCTTTATAGAGTGGCTGCAAAAATGTAAGATGCATTATAGATGATATAGGAATCATTTAG	TGCAGTTGGCCTTTATAGAGTGGCTGCAAAAATGTAAGATGCATTATAGATGATATAAGAATCATTTAG	chr1L	199677037	1	9.88e-28	Minus	57:G>A	0	-	0	0	2	0	0	0	0	0	-	0	-	0	0	0	0	0	0	0	0	-	0	0	0	0	0	-	0	0	2	0	0	-	0	-	0	-	0	0
D04658	32612114	TGCAGGGAAAATGCTTGAAGAGAGGAGAAGGAATTTGTTTTGGACGCCTTGCGCTACCTACTGTATTAC	TGCAGGAAAAATGCTTGAAGAGAGGAGAAGGAATTTGTTTTGGACGCCTTGCGCTACCTACTGTATTAC	chr1L	670766974	1	3.55e-27	Minus	6:G>A	0	0	0	0	0	0	0	0	0	0	0	0	0	-	0	-	0	0	0	0	-	0	0	-	0	0	0	0	0	0	-	0	0	-	0	0	0	0	0	0
D04664	13904254	TGCAGAAAAACTTGGTGGATCTGATCCAACAGTTCCACAGATCCATTGACTCCAAAATACACAGTAGAC	TGCAGAAAAACTTGGTGGATCTGATCCAACAGTTCCACAGATCCATTGACTCCAAAATACACGGTAGAC	chr4	1174092988	1	4.6e-26	Minus	62:A>G	1	1	1	1	1	1	1	1	1	1	1	1	1	1	0	1	1	1	1	1	-	1	1	-	1	1	1	1	1	1	-	1	1	1	1	1	1	1	1	1
D04666	13908605	TGCAGAAAAAGCTAGGGATGCAGCAAGTTGTGAGAGTGATGAAATTGGTGAAACGACCTGTTCTGAACT	TGCAGAAAAAGCAAGGGATGCAGCAAGTTGTGAGAGTGATGAAATTGGTGAAACGACCTGTTCTGAACT	chr2	964453949	1	4.6e-26	Minus	12:T>A	1	1	2	1	1	1	1	1	1	1	1	-	1	1	1	1	1	1	1	1	1	1	1	1	1	1	-	1	1	1	2	1	-	1	1	1	1	0	1	1
D04706	32609345	TGCAGAAAGTCAAAGATAATAACTAAATTTAGCCAAGAAAAAACTAAAAATGTCCGGGCAATAAATTTA	TGCAGAAAGTCAAAGATAATAACTAAATTTAGCCAAGAAAAAACTAAAAATGTCCGAGCAATAAATTTA	chr3	514444701	1	4.6e-26	Plus	56:G>A	-	-	0	0	0	0	0	1	0	2	0	-	0	-	-	0	0	0	0	-	1	0	2	-	0	0	0	1	0	0	0	1	-	0	0	-	2	0	0	-
D04712	39972129	TGCAGAAATGACCAAAAGTTATTTACATCATTCATTTCACACATTTCGCTCAAGACACGGATTTCAAAT	TGCAGAAATGACCAAAAGTTATTTACATCATTCATTTCACACATTTCGTTCAAGACACGGATTTCAAAT	chr4	1455637633	1	9.88e-28	Plus	48:C>T	0	-	0	0	0	0	0	0	0	0	0	0	0	0	-	0	0	0	0	0	0	0	0	-	0	0	0	0	0	0	-	0	0	0	0	0	0	0	0	0
D04718	3531616	TGCAGAACAAAGATGGGCAAGAGCCAAAGCAACTCGTCTTTGGAATGCCTTTTCTGAAACCCGCATAAG	TGCAGAACAAAGATGGGCAAGAGCCAAAGCAACTCGTCTTTGGAATGCGTTTTCTGAAACCCGCATAAG	chr1L	617915019	1	9.88e-28	Minus	48:C>G	0	0	0	-	0	0	0	0	0	-	0	0	0	-	-	0	0	0	-	0	0	0	-	0	-	0	-	0	0	0	0	-	0	0	0	0	0	0	0	-
D04719	13864669	TGCAGAACAAAGGAGTCTTTGCTGGAACAGGTTTAGTTCTTTGTTTCATCGCTGTTTAGATGGAATTTG	TGCAGAACAAAGGAGTCTTTGCTGGAACAGGTGTAGTTCTTTGTTTCATCGCTGTTTAGATGGAATTTG	chr4	812631420	1	4.6e-26	Plus	32:T>G	0	-	2	-	2	0	0	-	-	0	0	1	0	0	-	0	0	1	0	0	0	0	0	0	0	0	0	0	0	0	-	0	1	0	0	-	0	0	0	-
D04735	3521785	TGCAGAACCTCCTTAGTAAATTGGCTCAAGTAAAATGACTCGGGATTTTTCATAAGTTTCAACAAGTTT	TGCAGAACCTCCTTAGTAAATTGGTTCAAGTAAAATGACTCTGGATTTTTCATAAGTTTCAACAAGTTT	chr5	1363227070	1	9.88e-28	Minus	24:C>T	0	-	0	0	0	0	0	0	0	-	0	0	0	0	0	0	0	0	0	-	0	0	0	0	0	0	0	0	0	0	0	0	0	0	0	-	0	0	0	-
D04750	22856522	TGCAGAAGAAAGAACTGGTGTTACATTTGATGATTTTGCTGGCCAGGAATATATAAAGAGGGAACTACA	TGCAGAAGAAAGAACTGGTGTTACATTTGATGATTTTGCTGGCCAGGAATATATAAAAAGGGAACTACA	chr2	903292659	1	9.88e-28	Plus	57:G>A	0	-	0	0	0	0	0	0	0	0	0	0	0	0	-	0	0	0	0	-	-	0	0	0	0	-	0	0	0	0	0	0	-	0	0	0	0	0	0	0
D04769	22856537	TGCAGAAGCTAAGATGCAGGAGCTGAAAGCAAACATGGCAGTTCTTGGTAAAGAAGCTTCAGCTGCATT	TGCAGAAGCTAAGATGCAGGAGCTGAAAGCAAACATGGCAGTTCTTGGTAAAAAAGCTTCAGCTGCATT	chr6	1101376587	1	9.88e-28	Minus	52:G>A	0	0	0	0	0	0	0	0	0	0	-	0	0	0	2	0	0	0	-	0	-	0	-	0	0	0	0	0	0	0	0	0	-	-	0	0	0	0	0	0
D04786	39977015	TGCAGAATACCAGGAAAAAGTTCGAGTCTACCCGAGACCAGTTAGCACAGGCACTGTATGAAAAGGGGC	TGCAGAATACCAGGAAAAAGTTTGAGTCTACCCGAGACCAGTTAGCACAGGCACTGTATGAAAAGGGGC	chr1S	712240198	1	9.88e-28	Minus	22:C>T	0	0	0	0	0	0	0	0	0	0	0	-	0	0	0	0	0	2	0	0	-	0	2	-	0	-	0	0	0	0	-	0	0	0	0	0	0	0	-	-
D04795	3522833	TGCAGAATCTTCCATACATATTCGTTGGAAATTGCGATAGATTGCAGAGCATTGTGACGATTGTATCCG	TGCAGAATCTTCCATACATATTCGTTGGAAATTGCGATAAATTGCAGAGCATTGTGACGATTGTATCCG	chr3	388223044	1	9.88e-28	Minus	39:G>A	0	0	2	0	2	0	0	0	0	0	-	2	0	-	0	0	0	0	0	0	0	0	0	-	0	0	0	0	0	0	0	0	0	0	0	-	0	0	0	0
D04796	3522833	TGCAGAATCTTCCATACATATTCGTTGGAAATTGCGATAGATTGCAGAGCATTGTGACGATTGTATCCG	TGCAGAATCTTCCATACATATTCGTTGGAAATTGCGATAGATTGCAGAGCATTGTGACTATTGTATCCG	chr3	388223025	1	9.88e-28	Minus	58:G>T	0	0	0	0	0	0	0	0	0	0	-	0	0	1	0	0	0	0	0	0	0	0	0	-	0	0	0	0	0	0	0	0	0	0	0	-	0	0	0	0
D04832	3508665	TGCAGACCATGCAGTCCTTGCCAATTAGCGACCGAGATCAGATAGAGATTTATATAACATCATCAATTA	TGCAGACCATGCAGTCCTTGCCAATTAGTGACCGAGATCAGATAGAGATTTATATAACATCATCAATTA	chr4	218564939	1	9.88e-28	Plus	28:C>T	2	0	0	-	0	0	-	0	0	0	0	0	0	0	0	-	0	0	0	1	0	0	-	0	0	-	-	-	0	2	0	0	0	0	0	-	0	-	2	-
D04861	13908729	TGCAGAGAATGATCAGCGTACGAAATCTTGCATGAATATGTTAGTGGTAAGATCATGTCATTTCAGATG	TGCAGAGAATGATCACCGTACGAAATCTTGCATGAATATGTTAGTGGTAAGATCATGTCATTTCAGATG	chr1L	1550255053	1	9.88e-28	Minus	15:G>C	0	0	0	0	0	0	0	0	0	0	0	0	0	-	0	2	0	0	0	0	0	0	-	0	0	2	0	0	0	0	0	0	0	0	0	0	0	0	0	0
D04877	13904415	TGCAGAGATGTTTTACAAAACTATCAATGAGTAAAGCATTTCATTAGATATCAAACAAACATTATAAGG	TGCAGAGATGTTATACAAAACTATCAATGAGTAAAGCATTTCATTAGATATCAAACAAACATTATAAGG	chr1L	1502569525	1	9.88e-28	Minus	12:T>A	0	0	0	0	0	0	2	0	0	2	0	-	0	0	0	0	0	0	0	0	0	0	0	0	0	-	0	0	0	0	0	0	0	0	0	0	0	0	0	0
D04889	32610288	TGCAGAGCTGCATCAAAGCCAATCCAGATGCGTTCTCTAAGGACATTCTAGGCGAAGATGAAAGCGTTG	TGCAGAGCTGCATCAAAGCCAATCCAGATGCATTCTCTAAGGACATTCTAGGCGAAGATGAAAGCGTTG	chr4	359557055	1	9.88e-28	Plus	31:G>A	0	0	-	0	0	2	0	-	0	0	-	0	0	1	0	0	0	0	0	0	0	0	0	0	0	0	0	0	0	0	0	0	0	0	0	0	0	0	0	0
D04890	39972580	TGCAGAGCTGGAGGCGAACGAGACTTGCCAGGCGTGAATTTATCAGATGCTCCAAAAACAGCTTTGTTT	TGCAGAGCTGGAGGTGAACGAGACTTGCCAGGCGTGAATTTATCAGATGCCTCAAAAACAGCTTTGTTT	chr6	282857897	1	9.88e-28	Plus	14:C>T	0	0	0	0	0	0	0	0	0	-	-	0	0	0	0	0	0	0	0	-	0	0	-	0	0	0	0	0	0	0	0	-	-	0	-	0	0	0	0	0
D04891	39972580	TGCAGAGCTGGAGGCGAACGAGACTTGCCAGGCGTGAATTTATCAGATGCTCCAAAAACAGCTTTGTTT	TGCAGAGCTGGAGGCGAACGAGACTTGCCAGGCGTGAATTTATCAGATGCCTCAAAAACAGCTTTGTTT	chr6	282857933	1	9.88e-28	Plus	50:T>C	0	0	0	0	0	0	0	0	0	-	-	0	0	0	0	0	0	0	0	-	0	0	-	0	0	0	0	0	0	0	0	-	-	0	-	0	0	0	0	0
D04899	3522955	TGCAGAGGATAATGCTGAAACTGTAATTGGCTGAATTTTAGGAAGGGAAAGTATATTTATTACAGATCG	TGCAGAGGATAATGCTGAAACTGTAATTGACTGAATTTTAGGAAGGGAAAGTATATTTATTACAGATCG	chr4	1393975986	1	6.57e-24	Minus	29:G>A	0	0	0	0	0	0	0	0	0	0	0	0	0	0	1	0	0	0	0	0	0	0	0	0	0	0	0	0	-	2	0	0	-	0	0	0	0	0	0	0
D04900	3522955	TGCAGAGGATAATGCTGAAACTGTAATTGGCTGAATTTTAGGAAGGGAAAGTATATTTATTACAGATCG	TGCAGAGGATAATGCTGAAACTGTAATTGGCTGACTTTTAGGAAGGGAAAGTATATTTATTACAGATCG	chr4	1393975981	1	6.57e-24	Minus	34:A>C	0	0	0	0	0	0	0	0	0	0	0	0	0	0	-	0	0	0	0	0	0	0	0	0	0	0	0	0	-	0	0	0	-	0	0	0	0	0	0	0
D04906	39977156	TGCAGAGGCTGTTGGTCGGATGTGAAGACAGCTGAACCATGAAATGGATGCCATTTCTTTACAGATCGG	TGCAGAGGCTGTTGGTCGGATGTGAAGACAGCTGAACCATGAAACGGATGCCATTTCTTTACAGATCGG	chr2	1357542625	1	2.29e-23	Minus	44:T>C	-	0	-	0	0	0	0	0	0	0	0	0	2	0	0	2	0	0	0	2	0	0	0	0	0	0	0	0	0	0	0	2	0	0	0	0	0	0	0	0
D04918	39964250	TGCAGAGTAACAAAGTTCCTCAAAAATTGATAGAAAATTCAGCCTTAGATATAGATATAGTTGATCCAA	TGCAGAGTAACAAAGTTCCTCAAAAGTTGATAGAAAATTCAGCCTTAGATATAGATATAGTTAATCCAA	chr1L	440082226	1	2.14e-24	Plus	25:A>G	0	0	0	0	0	0	-	-	0	0	0	0	0	0	0	0	0	0	-	0	0	0	0	0	0	-	0	-	0	0	0	-	0	0	-	-	0	0	0	0
D04920	22856605	TGCAGAGTAAGAAGTAGAAAATTTTGACTGTGGTAGGAATTTTTTTCCTTTACCCTTCTTTTTTCTTTT	TGCAGAGTAAGAAGTAGAAAATTTTGACTGTGGTAGGAATATTTTTCCTTTACCCTTCTTTTTTCTTTT	contig_5174	174407	1	7.69e-24	Plus	40:T>A	0	-	-	0	0	0	0	0	0	0	0	0	0	0	0	0	0	0	2	-	0	0	0	0	0	0	0	0	0	0	0	0	0	0	-	0	1	0	0	-
D04932	39977174	TGCAGAGTCTTCCACACGCTGTAAAAACTACCACATCAATACAGCAAATATAAATTTCAATACTACATA	TGCAGAGTCTTCCACGCGCTGTAAAAACTACCACATCAATACAGCAAATATAAATTTCAATACTACATA	chr6	633635641	1	9.88e-28	Minus	15:A>G	0	0	0	0	0	0	0	0	0	0	0	0	0	0	0	0	0	0	0	0	0	0	0	-	0	0	0	-	0	0	0	0	0	0	0	0	0	0	0	0
D04933	39977174	TGCAGAGTCTTCCACACGCTGTAAAAACTACCACATCAATACAGCAAATATAAATTTCAATACTACATA	TGCAGAGTCTTCCACAAGCTGTAAAAACTACCACATCAATACAGCAAATATAAATTTCAATACTACATA	chr6	633635640	1	9.88e-28	Minus	16:C>A	0	0	0	0	0	0	0	0	0	0	0	0	0	0	0	0	0	0	0	0	0	0	0	-	0	0	0	-	0	0	0	0	0	0	0	0	0	0	0	0
D04934	39977174	TGCAGAGTCTTCCACACGCTGTAAAAACTACCACATCAATACAGCAAATATAAATTTCAATACTACATA	TGCAGAGTCTTCCACACGCTGAAAAAACTACCACATCAATACAGCAAATATAAATTTCAATACTACATA	chr6	633635635	1	9.88e-28	Minus	21:T>A	0	0	0	0	0	0	0	0	0	0	0	0	0	0	0	2	0	0	0	0	0	0	0	-	0	0	0	-	0	0	0	0	0	0	0	0	0	0	0	0
D04943	3523907	TGCAGAGTTCACTGCCAATCTCAGATCTGTTAGTATATTACTCGATTCATATTGCTTTCAGGTTTTCTC	TGCAGAGTTCACTGCCAATCTCAGATCTGTTAGTATATTACTCGATTCATATTGCTTTCAGATTTTCTC	chr3	340576607	1	9.88e-28	Plus	61:G>A	0	0	0	0	0	0	0	0	-	0	0	0	0	0	-	-	0	0	-	0	0	-	0	0	-	0	0	0	0	0	0	0	-	0	0	-	0	0	0	0
D04944	13863858	TGCAGAGTTCCAGTACCTACCAGTCGTATTGTGTTGCGACTTCTATTCCTTTCGCTGTAGTTCAATTGT	TGCAGAGTTCCAGTACCTACCAGTCGTATTGCGTTGCGACTTCTATTCCTTTCGTTGTAGTTCAATTGT	chr5	796248069	1	9.88e-28	Plus	31:T>C	0	-	0	0	0	0	2	0	-	0	0	0	0	0	0	0	0	0	-	0	0	0	-	0	0	0	0	0	0	0	0	0	0	0	0	0	0	0	0	-
D04967	3521841	TGCAGATAGAAGTATACACTCCAATATAAAATATATTTCTCCCATCTAAAATAAAAACTTTACAGATCG	TGCAGATAGAAGTGTACACTCCAATATAAAACATATTTCTCCCATCTAAAATAAAAACCTTACAGATCG	chr1L	1646023598	1	6.57e-24	Minus	13:A>G	0	0	0	0	0	0	0	-	-	0	-	0	0	0	0	0	0	0	0	0	0	0	0	-	0	0	0	-	0	0	0	0	0	0	0	0	0	0	0	0
D04982	13908767	TGCAGATCATGTCCTCATGTTACTGAGATACAAAGCTTGGTCACCATTCAACTCATTCCTTTGAGAATG	TGCAGATCATGTCCTCATGTTACTGAGATACAAAGCTTGGTCACCATTCAACTCATTCCTTTGAGAATT	chr5	473386438	1	9.88e-28	Plus	68:G>T	0	0	0	0	0	0	0	0	-	2	0	0	0	0	0	0	0	0	0	0	0	0	0	0	2	0	0	0	0	0	0	0	0	-	0	-	0	-	0	0
D04983	3529041	TGCAGATCCCACAGCACTGAGCCAATACAGGTGGATTTCATCAACTGGTTCCCCTATCCTCACTTATTA	TGCAGATCCCACAGCACTGAGCCAATACAGGTGGATTTCATCAATTGGTTCCCCTATCCTCACTTATTA	chr6	1200735565	1	9.88e-28	Minus	44:C>T	0	0	0	-	0	0	0	0	0	0	0	0	0	0	-	0	0	2	-	0	0	0	0	0	0	0	0	0	-	0	0	0	0	0	0	0	0	0	0	0
D04984	3529041	TGCAGATCCCACAGCACTGAGCCAATACAGGTGGATTTCATCAACTGGTTCCCCTATCCTCACTTATTA	TGCAGATCCCACAGCACTGAGCCAATACAGGTGGATTTCATCAACTGGTTCCCCTATTCTCACTTATTA	chr6	1200735552	1	9.88e-28	Minus	57:C>T	2	0	0	-	0	0	0	0	0	0	2	0	0	2	-	0	0	0	-	0	0	0	0	0	0	0	0	0	-	0	2	0	0	0	0	0	0	0	0	0
D05016	32609457	TGCAGATGGTGGATCTCAAGCTTCTCCTTCAAATAAATCTTCGCCACCAGAAGTGCCACTTTATCGCCT	TGCAGATGGTGGATCTCAAGCCTCTCCTTCAAATAAATCTTTGCCACCAGAAGTGCCACTTTATCGCCT	chr4	1381553181	1	9.88e-28	Minus	21:T>C	0	0	0	0	0	2	0	0	0	0	0	0	0	0	0	0	0	2	0	0	0	-	0	-	0	0	0	0	0	0	0	0	0	-	0	0	0	0	0	0
D05032	39964669	TGCAGATTCATTGAGATATACTTCTGGTTTAGCAGTGGCTCTGGCAATTGTTTTTCTAGTCATAACTGC	TGCAGATTCATTGAGATATACTTCTGGTTTAGCAGTGGCTCTAGCAATTGTTTTTCTAGTCATAACTGC	chr4	523233697	1	9.88e-28	Plus	42:G>A	0	0	0	0	0	0	0	0	-	0	0	-	0	0	0	0	0	0	0	0	0	0	0	0	0	0	0	0	0	0	0	0	0	0	0	0	0	0	0	-
D05042	13904505	TGCAGATTGATTCGTGACAATATAAAATGTAATTAGCATAATAACTTCCTCACACTTCAAACTCAGAAG	TGCAGATTGAATCGTGACAATATAAAATGTAATTAGCATAATAACTTCCTCACACTTCAAACTCAGAAG	chr4	1169360942	1	9.88e-28	Minus	10:T>A	0	0	-	0	0	0	0	-	1	0	0	0	-	0	0	0	0	0	0	-	0	0	-	0	0	-	0	0	0	0	-	0	0	0	0	0	0	-	0	0
D05043	3519930	TGCAGATTGCAGAATTCATAATCAATATTTATTGTCATTTTATAAACGCTGTGTGTATTACTAAAAGGT	TGCAGATTGCAGTATTCATAATCAATATTTATTGTCATTTTATAAACGCTGTGTGTATTACTAAAAGGT	chr4	103427867	1	9.88e-28	Minus	12:A>T	0	0	-	0	0	0	0	0	0	-	0	0	0	0	0	2	0	0	0	0	0	0	0	0	0	0	0	0	0	0	-	0	0	0	-	0	0	0	0	0
D05044	3519930	TGCAGATTGCAGAATTCATAATCAATATTTATTGTCATTTTATAAACGCTGTGTGTATTACTAAAAGGT	TGCAGATTGCAGAATTCATAATCAATATTTATTGTCATTTTATAAACGCTGTGTATATTACTAAAAGGT	chr4	103427825	1	9.88e-28	Minus	54:G>A	0	0	-	0	0	0	0	0	0	1	0	0	0	0	0	0	0	0	0	0	0	0	0	0	0	0	0	0	0	0	-	0	2	0	-	0	0	0	0	0
D05045	3519930	TGCAGATTGCAGAATTCATAATCAATATTTATTGTCATTTTATAAACGCTGTGTGTATTACTAAAAGGT	TGCAGATTGCAGAATTCATAATCAATATTTATTGTCATTTTATAAACGCTGTGTGTATTACTAGAAGGT	chr4	103427816	1	9.88e-28	Minus	63:A>G	0	0	-	0	0	0	0	0	0	-	0	0	0	0	0	0	0	0	0	0	0	0	0	0	0	0	0	0	0	0	-	0	0	0	-	0	0	0	0	0
D05115	18315016	TGCAGCACGGACACCTCTGAAGGTGTCAGACAAACAAGTGTGCCCAGTGTCCGTGCTTCATATTGAATA	TGCAGCACCGACACCTCTGAAGGTGTCAGACAAACAAGTGTGCCCAGTGTCCGTGCTTCATATTGAATA	chr3	136489820	1	4.6e-26	Minus	8:G>C	0	2	0	0	0	0	0	0	0	0	0	2	0	0	0	0	0	0	0	0	-	0	0	0	2	0	0	-	0	0	0	1	-	0	0	0	0	0	0	0
D05116	18315016	TGCAGCACGGACACCTCTGAAGGTGTCAGACAAACAAGTGTGCCCAGTGTCCGTGCTTCATATTGAATA	TGCAGCACCGACACCTCTGAAGGTGTCAGGCAAACAAGTGTGCCCAGTGTCCGTGCTTCATATTGAATA	chr3	136489799	1	4.6e-26	Minus	29:A>G	0	0	0	0	0	0	0	0	0	0	0	0	0	0	0	0	0	0	0	0	-	0	0	0	0	0	0	-	0	0	0	-	-	0	0	0	0	0	0	0
D05119	13867454	TGCAGCAGAATTGGCAAATGCTCACCAGTTCATTAGTAGTTTGCAGAAGGTAAATTTCGTTCGTCCTTT	TGCAGCAGAATTGGCAAATGCTCACCAGTTCATTAGTAGTTTGCAGAAGGTAAATTTCGTTCGTCCTTC	chr4	1381551447	1	9.88e-28	Minus	68:T>C	0	0	0	0	0	0	0	0	0	0	0	0	0	2	0	0	0	0	2	0	-	0	0	-	0	0	1	2	0	0	0	0	0	0	0	0	0	0	-	0
D05159	32608454	TGCAGCATGACCTCTCCACCAGTTATCACCATCCAAAGCAGGTCGTCTAAGAAAATGAATCAAGTACAT	TGCAGCATGACCTCTCCACCAGTTGTCACCATCCAAAGCAGGTCGTCTAAGAAAATGAATCAAGTACAT	chr3	10210101	1	4.6e-26	Minus	24:A>G	0	0	0	0	0	0	0	0	0	-	0	0	0	0	0	0	0	0	0	-	-	0	0	0	0	0	-	0	0	2	0	0	0	0	0	1	0	0	0	-
D05160	32608454	TGCAGCATGACCTCTCCACCAGTTATCACCATCCAAAGCAGGTCGTCTAAGAAAATGAATCAAGTACAT	TGCAGCATGACCTCTCCACCAGTTATCACCATCCAAAGCAGGTCGTCTAAGAAAATGAATAAAGTACAT	chr3	10210065	1	4.6e-26	Minus	60:C>A	0	0	0	0	0	0	0	0	0	-	0	0	0	0	0	0	0	0	0	1	-	0	0	0	0	0	-	0	0	0	0	0	0	0	0	-	0	0	0	-
D05162	22856345	TGCAGCATGCGCGCGGTGCAGCTTGTGACTGTCGGTAAAAGCAAAGAGTTCTCGTGAATCTTATCATAG	TGCAGCATGCGCGCGGTGCAGCTTGTGACTGTCGGTAAAAGCTAGGAGTTCTCGTGAATCTTATCATAG	chr4	224129056	1	9.88e-28	Minus	42:A>T	0	0	0	-	0	0	0	-	0	0	0	0	0	-	0	-	0	0	-	0	0	0	-	0	0	0	0	-	0	1	0	0	0	0	0	0	0	-	0	-
D05176	39965304	TGCAGCCAAAGGGGTCTCTTATTCTGAAATAGAAATAGAACCATACAACTTTACACTCAATAAGGTAAC	TGCAGCCAAAGGGGTCTCTTATTCTGAAATAGAAATAGAACCATACAACTTTACACTCAATAAGGTTAT	chr4	1349903844	1	9.88e-28	Minus	66:A>T	2	0	0	-	0	0	0	0	0	-	0	-	0	-	0	0	0	0	0	0	0	-	0	0	0	0	0	-	0	0	0	0	0	-	0	0	0	0	0	0
D05181	13910681	TGCAGCCAAGACAAAAGACAACACAGTCATCACGGATAAAGTGAGGAATGTGAATGGGGATGCATCTGA	TGCAGCCAAGACAAAAGACAACACAGTCATCTCGGAGAAAGTGAGGAATGTGAATGGGGATGCATCTGA	chr3	572178803	1	9.88e-28	Minus	31:A>T	0	0	0	0	0	0	0	0	-	0	0	-	0	-	0	0	0	0	0	0	0	2	0	0	0	0	0	0	0	0	0	0	0	0	0	0	0	0	0	-
D05187	3521043	TGCAGCCACAAATCATAGTCATGTGACAAGGGCCTGTATCGTAACCAATAAGACCAACTCTCATCTGCC	TGCAGCCACAAATCATAGTCATGTGACAAGGGCCTATATCGTAACCAATAAGACCAACTCTCATCTGCC	chr3	1215649206	1	9.88e-28	Plus	35:G>A	0	0	0	0	0	0	0	0	0	0	2	0	0	-	-	-	0	-	-	0	-	0	0	0	-	0	0	0	0	0	0	0	0	0	0	0	0	0	0	-
D05196	39977468	TGCAGCCATATGTGGTGATGTCTTTGCTAGTCCAACTGTTGATGCTATTCTTGCAGTATGCTTCTTATT	TGCAGCCATATGTGGCGATGTCTTTGCTAGTCCAACTGTTGATGCTATTCTTGCAGTATGCTTCTTATT	chr1S	1228203117	1	4.6e-26	Plus	15:T>C	1	-	1	0	2	1	1	1	1	1	1	1	2	-	1	1	1	1	1	1	1	1	1	-	1	1	1	1	1	1	1	1	1	1	1	1	1	-	2	-
D05209	3513950	TGCAGCCCCTACAACCTTTTTCATCAACAAGTCAAAAACCAAACACGTGTGTATGTCATAGTGCTACTA	TGCAGCCCCTACAACCTTTTTCATCAACAAGTCAAAAACCAAACACGTGTGAATGTCATAGTGCTACTA	chr1S	143112667	1	9.88e-28	Plus	51:T>A	0	-	0	0	0	0	0	0	-	0	-	0	0	1	0	0	2	0	0	0	0	0	0	0	0	0	0	-	0	0	0	0	0	0	0	-	0	0	0	0
D05219	13908880	TGCAGCCGAAACAGCAACATGTGTAACCACATCACGATGCATATAGCTTTTCTCATACCTATAAAATCA	TGCAGCCGAAACTGCAACATGTGTAACCACATCACGATGCATATAGCTTTTCTCATACCTATAAAATCA	chr1S	413050505	1	4.6e-26	Plus	12:A>T	0	0	0	0	0	0	0	-	-	0	-	0	0	0	0	0	0	0	0	0	0	0	0	0	0	0	0	0	0	0	0	0	0	0	-	-	0	0	0	0
D05265	32608481	TGCAGCTAGGAACAATATTGGTGTTGTAGTTGCTCTTTGGGCTCCAATTATTCTGGTATGGGTCTATGA	TGCAGCTAGGAACAATATTGGTGTTGTAGTTGCTCTTTGGGCTCCAATTATTCTGGTATGGGTCTATTA	chr1S	9990620	1	9.88e-28	Minus	67:G>T	0	0	0	0	0	0	-	-	0	0	0	0	0	0	0	0	0	0	0	0	0	0	1	0	0	0	0	0	0	0	0	0	0	0	0	0	0	0	0	2
D05267	3518654	TGCAGCTATGGCAGCTGCTTCCATTGTGTTTAGGATAACTAATCCACATTACTCTCAACTACTTTTGCA	TGCAGCTATGGCAGTTGCTTCCATTGTGTTTAGGATAACTAATCCACATTACTCTCAACTACTTTTGCA	chr2	570928886	1	9.88e-28	Minus	14:C>T	0	-	0	0	0	0	0	0	0	0	0	0	0	0	0	0	0	0	-	0	0	0	0	0	0	0	0	0	0	0	0	0	0	0	0	-	0	0	-	-
D05273	13866540	TGCAGCTCATCAACAATAAACATAAATTTCAATAATCCTAATTGAAAATCTTGATACTTGACAAATAGC	TGCAGCTCATCAACAATAATCATAAATTTCAATAATCCTAATTGAAAATCTTGATACTTGACAAATAGC	chr1L	1632686005	1	9.88e-28	Minus	19:A>T	0	-	-	-	-	0	0	-	0	0	0	0	0	0	0	-	0	0	-	-	0	0	0	0	0	-	-	0	0	0	0	0	-	0	0	0	0	0	0	0
D05284	13866546	TGCAGCTCGTGCTTTGGCAATTCTTGGTTTGCCTCTGGAGATAACTTTAGCTGTGTTTTCAGCATGTTT	TGCAGCTCGTGCTTTGGCAATTCTTGGTTTGCCTCTGGAGATAACTTCAGCTGTGTTTTCAGCATGTTT	chr4	1565967952	1	9.88e-28	Plus	47:T>C	0	0	0	0	0	0	0	0	0	0	0	0	0	0	-	0	0	0	0	-	0	0	0	-	1	0	0	0	0	0	0	0	2	-	-	0	0	0	0	0
D05288	39965770	TGCAGCTCTTTCATCGGATTTGCTATTTGAAAATGGCACAAACCAGTAGGACTGTAAGGCTATTCCAAT	TGCAGCTCTTTCATCGGATTTGCTATTTGAAAATGGCACAAACCAGTAGGACTGTAAGGCCATTCCAAT	chr1L	216550890	1	9.88e-28	Minus	60:T>C	0	-	0	0	0	0	0	0	0	-	-	0	0	-	0	-	0	-	-	-	0	0	0	0	0	0	0	-	0	0	0	0	0	-	0	0	0	-	0	0
D05289	39979124	TGCAGCTCTTTGTGTAGAGCGTCAATGGTTATGTATCTTGGTTGGCCCATCATGCTCAGGGAAAACTAA	TGCAGCTCTTTGTGTAGAGCGTCAATGGTTATGTATCCTTGTTGGCCCATCATGCTCAGGGAAAACTAA	chr4	373555100	1	9.88e-28	Minus	37:T>C	0	0	-	0	0	0	0	-	0	0	0	-	0	-	2	0	0	0	0	0	0	0	0	0	0	0	0	0	0	0	-	0	0	0	0	0	0	0	0	0
D05293	100149133	TGCAGCTGATTGTATCTGTCTTCCTCCCTTTGGACCCCATTCCACAAAGGGTACAGCTTCATCTATGTC	TGCAGCTGATTGTATCTGTCTTCCTCCCTTTGGACCCCATTCCACAAAGGGGACAGCTTCATCTATGTC	chr2	510613305	1	9.88e-28	Minus	51:T>G	0	0	0	-	0	0	0	0	0	0	0	0	0	-	0	0	0	0	0	0	0	0	-	0	0	0	0	0	0	0	0	0	0	0	0	0	0	0	0	0
D05302	13867682	TGCAGCTGCTATAATCAATCGACTCAAGCGAACTCTTAGGAGATATAGGGTTCATGTTAGTGGCACAAA	TGCAGCTGCTATAATCAATCGATTCAAGCGAACTCTTAGGAGATATAGGGTTCATGTTAGTGGCACAAA	chr3	373205573	1	9.88e-28	Plus	22:C>T	0	0	0	0	0	0	-	0	-	2	0	0	0	-	-	-	0	0	0	0	0	0	0	-	0	-	0	0	0	0	0	0	0	0	0	-	0	0	0	0
D05314	39973536	TGCAGCTGTAGATTCTATACGTCCCCAATCTCCGGGTTTTTCACACAAAAAAGATTTGAAGTCTTCTTC	TGCAGCTGTAGATTCTATACGTCCCCAATCTCCGGCTTTTTCACACAAAAAAGATTTGAAGTCTTCTTC	chr6	1226976338	1	4.6e-26	Minus	35:G>C	0	-	0	-	0	0	0	0	0	-	-	-	0	0	0	0	0	0	-	0	0	0	0	0	-	0	1	-	0	0	0	0	-	-	0	0	0	0	-	0
D05322	32610442	TGCAGCTTCCGCCAGCTCCGCCTCCACCACCATTTCCAGAAGGATATGTTCCGCCTTCAACAGCAGAAA	TGCAGCTTCCGCCAGCTCCACCTCCACCACCATTTCCAGAAGGATATGTTCCGCCTTCAACAGCAGAAA	chr4	413421038	1	9.88e-28	Plus	19:G>A	0	2	0	0	2	0	0	0	-	0	0	0	0	0	0	0	0	0	0	0	-	0	0	0	0	-	0	0	0	0	-	0	0	-	2	-	0	0	0	0
D05323	32610442	TGCAGCTTCCGCCAGCTCCGCCTCCACCACCATTTCCAGAAGGATATGTTCCGCCTTCAACAGCAGAAA	TGCAGCTTCCGCCAGCTCCGCCTCCACCAGCATTTCCAGAAGGATATGTTCCGCCTTCAACAGCAGAAA	chr4	413421048	1	9.88e-28	Plus	29:C>G	0	0	0	0	0	0	0	0	-	0	0	2	0	0	0	0	0	0	0	0	-	2	0	2	0	-	0	0	0	0	1	0	0	-	0	-	0	0	0	0
D05347	32609571	TGCAGGAACCTCATCTCAGAATGCTAATGGCTTCATGCATGGATGGATGAACTGAGTTTATAAATTAGT	TGCAGGAACCTCATCCCATAATGCTAATGGCTTCATGCATGGATGGATGAACTGAGTTTATAAATTAGT	chr1S	1489087518	1	9.88e-28	Minus	15:T>C	0	0	0	0	0	0	0	0	0	0	0	0	0	0	0	0	0	0	0	0	0	0	0	0	0	0	0	0	0	0	0	0	0	0	-	0	0	0	0	-
D05352	3523343	TGCAGGAAGCATAATAGAAGTCATTAGCAAAAGAAAATTAGGTTGTTCCATGGAAGGAAAATTGTTATA	TGCAGGAAGCATAATAGAAGCCATTAGCAAAAGAAAATTAGGTTGTTCCATGGAAGGAAAATTGTTATA	chr1S	826077306	1	9.88e-28	Minus	20:T>C	0	0	0	0	0	0	-	-	0	0	0	0	0	-	0	-	0	0	0	0	0	0	0	0	0	0	-	-	0	0	0	-	0	-	0	0	0	2	0	0
D05353	3523343	TGCAGGAAGCATAATAGAAGTCATTAGCAAAAGAAAATTAGGTTGTTCCATGGAAGGAAAATTGTTATA	TGCAGGAAGCATAATAGAAGTCATTAGCAAAAGAAAATTAGGTTGTTCCATGAAAGGAAAATTGTTATA	chr1S	826077274	1	9.88e-28	Minus	52:G>A	0	0	0	0	0	0	-	-	0	0	0	0	0	-	0	-	0	0	0	0	0	2	0	0	0	0	-	-	0	0	0	1	0	-	0	0	0	0	0	0
D05354	3523343	TGCAGGAAGCATAATAGAAGTCATTAGCAAAAGAAAATTAGGTTGTTCCATGGAAGGAAAATTGTTATA	TGCAGGAAGCATAATAGAAGCCATTAGCAAAAGAAAATTAGGTTGTTCCATGGAAGGAAAATTGTAAGC	chr1S	826077261	1	9.88e-28	Minus	65:T>A	0	0	0	0	0	0	-	-	0	0	0	0	0	-	0	-	0	0	0	0	0	0	0	0	0	0	-	-	0	0	0	-	0	-	0	0	0	0	0	0
D05355	32613565	TGCAGGAAGCGAATCTTTCTTCTTGTGTGAAACAAAATCTCTAGCTTCATCAGATTCTTTACAGATCGG	TGCAGGAAGTGAATCTTTCTTCTTGTGTGAAACAAAATCTCTAGCTTCATCAGATTCTTTACAGATCGG	chr1S	1496519486	1	2.29e-23	Plus	9:C>T	0	0	-	0	0	0	0	2	0	0	0	0	0	0	-	0	0	0	0	0	0	0	0	0	0	2	-	0	0	0	0	0	0	0	0	0	0	0	0	0
D05357	39979841	TGCAGGAAGTGAATGTTCAAAAACTAGTTATCCTGCATTTGTCGCTGAGGTTCGATAAAACTAAACTAT	TGCAGGAAGTGAATGTTCAAAAACTAGTTATCCTGCATTTGTCGCTGAGGTTCGATAATACTAAACTAT	chr1L	515763627	1	9.88e-28	Plus	58:A>T	0	-	0	0	0	0	0	0	0	0	0	0	0	0	0	0	0	0	-	0	0	0	0	0	0	0	0	0	0	0	-	0	0	0	0	-	0	0	0	-
D05360	39980962	TGCAGGAATCAAAGTTCTGTATATTTTGAACTTTCATCAAATCATATCAACAATAATAAATTACAGATC	TGCAGGAATCAAAGTTCTGTATATTTTGAACTTTCATCAAATCATATCAACAATAATAAATTAAACTGA	chr1L	0	1	1.88e-24	Plus	65:G>C	0	0	0	0	0	0	0	0	0	-	0	0	0	0	0	-	0	0	-	0	0	0	0	0	0	0	0	0	0	0	0	0	0	0	0	0	0	0	0	0
D05364	3525526	TGCAGGAATGTTTTTATGGCAGATATCCTCACATCGTTGCACAATGTTTTGAAGTTGAGTAAAGTCTTG	TGCAGGAATGTTTTTATGGCAGATATCCTCACATCGTTGCACAATGTTTTGAAGTTTAGTAAAGTCTTG	chr1S	1285884275	1	9.88e-28	Plus	56:G>T	0	0	0	0	0	0	0	0	0	0	-	0	0	-	0	0	0	0	0	-	0	0	0	0	0	0	0	0	0	0	0	0	-	0	0	-	0	0	0	0
D05380	3524213	TGCAGGAGTGGAAAGGCTTCCGATATTTTATGTTTCAAATAATGTGTCGTAAGCTCTTCATTACTTATT	TGCAGGAGTGGAAAGGCTTCCGATATTTTATGTTTCAAATAATGTGTCGTAAGCACTTCATTACTTATT	chr1L	1793872557	1	9.88e-28	Minus	54:T>A	0	-	0	0	0	0	0	0	-	0	0	0	0	0	0	0	0	0	0	0	-	0	0	0	0	0	0	0	0	0	0	2	0	-	0	-	0	1	-	0
D05381	39973747	TGCAGGAGTTGAAAGCAACCCATTTTGACCAATCCAAATACGTCTTACTCCATTCGCTGCTGCCATTTT	TGCAGGAGTTGAAAGCAAGCCATTTTGTCCAATCCAAATACGTCTTACTCCATTCGCTGCTGCCATTTT	contig_4254	60302	1	9.88e-28	Minus	18:C>G	0	0	0	0	0	0	0	0	0	0	0	0	0	-	0	0	0	0	0	0	0	0	0	0	0	0	0	0	0	0	0	0	0	0	0	0	0	0	0	-
D05384	3521213	TGCAGGAGTTGAAGCGTCAAATGAGATTCAACCCGAAGTAGTCCCAACGAATCAGTTGCCCCCAAAGTC	TGCAGGAGTTGAAGCGTCAAATGAGATTCAACCCGAAGTAGTCCCAACGAATCAGTTGCCCCCAAAGAC	chr4	1347175432	1	9.88e-28	Plus	67:T>A	0	-	0	-	-	0	-	0	2	0	0	-	0	0	0	0	0	0	0	0	0	0	2	0	0	-	0	0	0	0	-	0	0	0	-	0	0	0	1	0
D05407	3521290	TGCAGGCACAGGTGTTGAACAAGAATTTGTGGCACAGGTATGGAATGCTATCTGTTGGCAATAGTTCTT	TGCAGGCACAGGTGTTGAACAAGAATTTGTGGCACAGGCATGGAATGCTATCTGTTGGCAATAGTTCTC	chr6	1137513307	1	9.88e-28	Plus	38:T>C	0	0	0	2	0	0	0	0	0	0	-	0	0	0	0	0	0	0	0	0	0	0	0	0	0	0	0	0	0	-	0	0	0	0	0	-	0	0	0	0
D05439	3521336	TGCAGGGAAGCATTACCGTGCACTAACGTGCACTGGATGAGTAAAAGTTGGGCTAACGTGCGCGGAGAG	TGCAGGGAAGCATTACCGTGCACTAACGTGCACTGGATGAGTAAAAGTTGGGCTAACGTGCGCGGAGAT	chr5	723007937	1	9.88e-28	Minus	68:G>T	0	0	0	0	0	0	0	0	0	-	0	0	0	-	1	0	0	0	0	0	0	0	1	0	2	0	0	0	0	0	0	0	0	-	1	0	0	2	0	2
D05455	32608544	TGCAGGGCGGGGTTTTGGTGGTGGATTGGAATTCACCCTTCCTTCTCACAAGTAATATTTACAGATCGG	TGCAGGGCGGGGTTTTGGTGGTGGTTTGGAATTCACCCTTCCTTCTCACAAGTAATATTTACAGATCGG	chr1L	605784425	1	2.29e-23	Plus	24:A>T	-	-	0	0	0	0	0	0	0	0	-	0	0	-	-	0	0	0	-	0	0	-	0	0	0	0	-	0	0	0	0	0	0	0	0	-	0	0	0	-
D05470	3519103	TGCAGGTAAGTTCTTTGTTATCCTCTCTTACGTTCTCTGTAATGAAGATCTCAGTCAAGGATGCTTCTG	TGCAGGTAAGTTCTTTGTTATCCTCTCTTACGTTCTGTGTAATGAAGATCTCAGTCAAGGATGCTTCTG	chr3	30117870	1	9.88e-28	Plus	36:C>G	0	-	0	0	0	0	0	-	0	0	0	0	0	0	-	0	0	0	0	-	-	0	-	0	0	0	0	0	0	0	0	0	0	0	0	0	0	0	0	0
D05473	3511482	TGCAGGTACTGTGCCACAATTGATGGTTTTCAATTATAGTACATGCAAAATAGTATTGTTTACTCTCTA	TGCAGGTACTGTGCCACAATTGATGGTTTTCAATTATAGTACAGGCAAAATAGTATTGTTTACTCTCTA	chr1S	836712712	1	9.88e-28	Plus	43:T>G	1	-	0	0	0	0	-	-	0	0	-	0	0	0	0	1	0	0	0	0	0	0	0	0	0	-	-	0	0	0	0	-	1	0	0	0	0	-	-	0
D05482	32612110	TGCAGGTCCCCCATCAACTCCATAGTCATGAAATCTGCGAGGGAGGAAAAATAAAGAAAAGTCATAAAA	TGCAGGCCCCCCATCAACTCCATAGTCATGAAATCTGCGAGGGAGGGAAAATAAAGAAAAGTCATAAAA	chr5	861342616	1	9.88e-28	Minus	46:A>G	0	0	0	0	0	0	0	0	0	0	0	0	0	-	2	-	0	0	-	0	0	0	0	0	0	0	0	0	0	0	-	0	0	0	0	0	0	0	-	0
D05485	39966680	TGCAGGTCTAACTTGACTATGATCATATAACCTTTTCTCTGTAGCACTTGGAGCACTTGATTTCTTCAG	TGCAGGTCTAACTTGACTGTGATCATATAACCTTTTCTCTGTAGCACTTGGAGCACTTGATTTCTTCAG	chr1S	707252038	1	9.88e-28	Minus	18:A>G	0	0	0	0	0	0	0	0	0	0	-	0	0	-	0	-	0	0	0	0	0	0	0	-	0	0	0	0	0	0	-	0	-	0	0	0	0	0	-	-
D05495	13904840	TGCAGGTGCTGCTGCCAGAACGAGTCATTCAGCTAAAAATTCCCCATTGAAGAGTTATACTGTGAGGCA	TGCAGGTGCTGCTGCCAAAACGAGTCATTCAGCTAAAAATTCCCCATTGAAGAGTTATACTGTGAGGCA	chr1L	439110872	1	4.6e-26	Minus	17:G>A	1	1	1	1	1	1	1	1	1	1	1	1	2	1	1	1	1	1	1	1	1	1	1	-	1	1	1	1	1	0	-	1	1	1	1	0	1	-	1	1
D05524	3511666	TGCAGGTTTGTTGGCATTTTATTGTATTCCAAGTTTCCAACTAGCTGGTTTTGTTTGTGCCTGTGGTGA	TGCAGGTTTGTTGGCATTTTATTGTATTCCAAGTTTCCAACTAGCTGGTTTTGTTTGTACCTGTGGTGA	chr2	903304556	1	9.88e-28	Plus	58:G>A	0	0	-	0	0	0	0	0	0	0	0	2	0	0	0	0	0	0	0	0	-	0	0	-	0	0	-	-	0	2	2	0	0	0	0	0	0	2	-	-
D05534	3518191	TGCAGTAAACACATCCTATTTTTACACCAAAAAATCATCTAATATATGTTTTCATTATCACTTCAAAAA	TGCAGTAAACACATCCTATTTTTACACTAAAAAATCATCTAATATATGTTTTCATTATCACTTCAAAAA	chr6	1464978998	1	9.88e-28	Plus	27:C>T	0	0	0	0	0	0	0	0	0	0	-	0	2	0	0	0	0	0	0	-	0	0	-	0	0	-	0	0	0	-	0	0	2	0	0	-	0	0	0	0
D05536	32609636	TGCAGTAAAGCATATGGAGACATAAGCGGGCAAAAAGACAAACAAAAAAAGACAAGCGTATAAAAAATA	TGCAGTAAAGCATATGGAGACATAAGCGGGCAAAAAGACAAACAAAAAAAGACAAGCGTAAAAAAAATA	chr3	201563831	1	9.88e-28	Minus	60:T>A	0	0	0	0	0	0	0	0	0	0	0	0	0	0	0	-	0	0	-	0	0	0	0	2	0	0	0	0	0	0	0	0	0	-	0	0	0	-	1	-
D05544	3523932	TGCAGTAACAATCAATCATGAAGAGTTTGTTATTATTATGTAAATTCAATATTTCACAGACACTGTCAG	TGCAGTAACAATCAATTATGAAGAGTTTGTTATTATTATGTAAATTCAATATTTCACAGACACTGTCAG	contig_8464	41746	1	9.88e-28	Minus	16:C>T	2	0	0	0	0	0	0	0	0	2	0	1	0	-	0	0	0	0	0	0	0	0	2	0	0	0	0	0	0	2	0	0	0	0	0	-	0	0	0	-
D05545	3523932	TGCAGTAACAATCAATCATGAAGAGTTTGTTATTATTATGTAAATTCAATATTTCACAGACACTGTCAG	TGCAGTAACAATCAATCATGAAGAGTTTGTTATTATTATGTAAATTCAATATTTCACACACACTGTCAG	contig_8464	41704	1	9.88e-28	Minus	58:G>C	0	0	0	0	0	0	0	0	0	0	0	-	0	-	0	0	0	0	0	0	0	0	0	0	0	0	0	0	0	0	0	0	0	0	0	-	0	0	0	-
D05549	13911712	TGCAGTAACATTCCAGCAAAAATGAATCCTAATGTCTTCATTTGTCTTTCACTTTATGCTGAACAAATG	TGCAGTAACATTCCAGCAAAAATGAATCCTAATGTCTTCATTTGTCTTTCACTTTATGCGGAACAAATG	chr5	833037142	1	9.88e-28	Minus	59:T>G	0	0	0	0	0	2	0	0	0	2	0	0	0	0	0	0	0	0	0	0	0	0	0	0	0	-	0	0	0	0	0	0	0	0	0	0	0	0	0	-
D05550	32610517	TGCAGTAACCATAGTCTACAGTCAGCACTACTTGAATCCACAATGATGCATTCAACAACAAACAATTTA	TGCAGTAACCATAGTCTACAATCGGCACTACTTGAATCCACAATGATGCATTCAACAACAAACAATTTA	chr5	676817168	1	9.88e-28	Plus	20:G>A	0	0	0	0	0	0	0	0	0	-	0	0	0	0	-	0	0	0	0	-	0	0	0	0	-	0	0	-	0	2	0	0	0	0	0	-	0	-	0	0
D05588	13909067	TGCAGTACTCAACTCAAATCCTACCTGTTGTCATCTTTAGCTCTAAGGCTCTGATTTATATTACAGATC	TGCAGTACTCAACTCAAATCCTACCTGTTGTCATCTTTAGCTCTAATGCTCTGATTTATATTACAGATC	contig_5443	5640	1	1.88e-24	Plus	46:G>T	0	0	0	-	0	0	0	0	-	0	-	0	0	0	-	0	0	0	0	-	0	0	0	0	0	0	0	0	0	0	0	0	0	0	0	2	0	0	0	0
D05592	3509482	TGCAGTAGAAAAGTGTAATCTACAGATGAAAATGTAGAGTTTTGCAACTCTTTGTACTTTTTTACAGAT	TGCAGTAGAAAAGTGTAATCTACAGATGAAAATGTAGAGTTTTGCAACTCTTTGTACTTTTTTAAAATT	chr6	0	1	5.37e-25	Minus	64:C>A	0	0	0	0	0	0	0	0	0	0	0	0	0	0	-	0	0	0	0	0	-	0	0	1	0	0	0	0	0	0	0	0	0	-	0	0	0	-	0	0
D05613	39974296	TGCAGTAGTTCGAAATCAACTATGATACTGAAAACATAATTGGCAGAATACTACGATAGTCAGAGAGAG	TGCAGTAGTACGAAATCAACTATGATACTGAAAACATAATTGGCAGAATACTACGATAGTCAGAGAGAG	chr1L	1764394320	1	9.88e-28	Plus	9:T>A	0	0	0	0	0	0	0	0	0	0	-	0	0	0	0	-	0	0	-	-	0	0	0	0	0	0	0	0	0	0	0	0	0	-	0	-	0	0	0	-
D05638	39974351	TGCAGTCAAAATGTTTTAGAAGTTGAAGATGGCAGTAATAAAATTGGAGATGGAAATGTTGGTGAACCC	TGCAGTCAAAATGTTTTAGAAGTTGAAGATGGCAGTAATAAAATTGGAGATGGAAATGTTGGTGAACCT	chr1L	208206457	1	9.88e-28	Plus	68:C>T	0	0	0	0	0	0	2	0	0	0	0	0	0	-	0	0	0	2	-	0	0	0	0	0	0	0	0	-	0	-	-	0	-	0	0	-	0	-	0	0
D05645	39979882	TGCAGTCAATCTGTGCTCCATCTTGCCAAATGAGGATCCGGCAGGTCGGGCCAATTGTTAGTAACCAAG	TGCAGTCAATCTGTGCTCCATCTTGCCAAATGAGGATCCGGCATGTCGGGCCAATTGTTAGTAACCAAG	chr6	770809369	1	9.88e-28	Minus	43:G>T	0	0	0	0	0	0	0	0	0	0	0	0	0	-	0	0	0	0	0	-	0	0	0	-	0	0	-	0	0	0	0	0	0	0	0	0	0	0	0	0
D05651	39977902	TGCAGTCACAGCTTGTGCAGTTCTAGATGTTCTTGGTCCTCCCTACTCTGATCCTGATGGCAGACACTG	TGCAGTCACAGCTTGTGCAGTTCTAGATGTTCTTGGTCCTCCTTACTCTGATCCTGATGGCAGACACTG	chr1S	43545318	1	9.88e-28	Plus	42:C>T	0	0	0	0	0	0	0	0	0	2	0	-	0	0	0	-	2	1	0	0	0	0	0	0	0	0	0	0	0	0	0	0	1	0	0	0	0	0	0	-
D05668	39977917	TGCAGTCCCAACAAATATTGTTGTCCTAAAACCAAACATTGGAAAATTACAGAATGGTACCAAAATTCA	TGCAGTCCCAACAAATATTGTTGTCCTAAAACCGAACATTGGAAAATTACAGAATGGTACTAAAATTCA	chr3	337786914	1	9.88e-28	Plus	60:C>T	0	0	0	0	0	0	0	0	0	0	0	0	0	-	2	-	0	0	0	0	-	1	0	0	-	0	0	0	0	2	0	0	0	0	0	0	0	0	-	-
D05674	22856894	TGCAGTCCTCTTTGCCTTTTGAAGGGTTGATGCTGAAAACTTTTGCATTGCAACCCCTGCATCAAACCT	TGCAGTCCTCTTTGCCTTTTGAAGGGTTGATGCTGAAAACTTTTGCATTGCAACTCCTGCATCAAACCT	chr1L	1344956780	1	9.88e-28	Plus	54:C>T	0	0	0	0	0	0	0	0	2	0	0	0	0	0	0	0	0	0	0	0	-	0	0	0	0	0	0	-	0	2	0	0	0	-	0	2	0	0	0	0
D05680	39963137	TGCAGTCGTGTCCAATATGCATCGAGTATTCTTGGGTGCCAAAACAAACACTGTTCATTACAAATTTTT	TGCAGTCGTGTCCAATATGCATCGAGTATTCTTGGGTGCCAAAATAAACACTGTTCATTACAAATTTTT	chr2	2917044	1	9.88e-28	Minus	44:C>T	0	0	0	0	0	0	0	0	0	0	0	0	0	0	-	0	2	0	-	1	0	0	0	0	0	0	0	0	0	0	0	0	0	-	0	-	0	0	-	0
D05708	39974484	TGCAGTGACCGGCGCCTTTTTATTGGCTAATCACATCACGCCTAGTCACTGTTTGTTGGACTCGATCGT	TGCAGTGACCGGCGCCTTTTTATTGGCTAATAACATCACGCCTAGTCACTGTTTGTTGGACTCGATCGT	chr5	751826994	1	9.88e-28	Minus	31:C>A	0	0	0	0	0	0	0	0	-	0	0	0	0	0	0	0	0	0	-	-	0	0	0	-	0	0	-	-	0	0	0	-	-	0	0	0	0	0	0	0
D05717	39974497	TGCAGTGATGATTTATCAATTTTTATTCCCTTAGAAACAGATATTTGCTTAGTTTGTGACGTCTCTTGA	TGCAGTGATGATTTATCAATTTTTATTCACTTAGAAACAGATATTTGCTTAGTTTGTGACGTCTCTTGA	chr4	992314592	1	9.88e-28	Plus	28:C>A	0	0	-	0	0	0	0	0	0	0	0	0	0	0	0	-	0	0	-	0	0	0	0	-	0	0	0	0	0	0	0	0	0	0	0	-	0	0	0	0
D05733	3506880	TGCAGTGCCAGTGAAGTAATACCCCGACTAGAATCACCTTACCCAGTAGCAATATGACTGTCAAAGGAA	TGCAGTCCCAGTGAAGTAATACCCCGACTAGAATCACCTTACCCAGTAGCAATATGACTGTCAAAGGAA	chr4	739256482	1	9.88e-28	Plus	6:G>C	0	0	0	0	0	0	-	-	0	-	0	-	0	0	0	0	0	0	0	0	0	0	0	-	0	1	0	-	0	0	0	0	0	-	0	0	0	0	-	-
D05751	39979290	TGCAGTGGATGAAACATAGTGATTGTCAATAAATGTAAACCATTTATGACTTCGACAGACTAACAAAAC	TGCAGTGGATGAAACACAGTGATTGTCAATAAATGTAAACCATTTATGACTTCGACAGACTAACAAAAC	chr2	1681867068	1	9.88e-28	Plus	16:T>C	2	0	-	0	2	0	0	-	0	0	0	-	0	-	0	0	0	0	0	0	0	0	0	0	0	0	0	-	0	0	1	0	-	-	0	0	0	0	2	0
D05752	39967548	TGCAGTGGATGCCATTGGTGGAATACACAGCTCAGCCAATTATGCAAAAGAGTGATGTTTTGAAGTGTA	TGCAGTGGATGCCATTGGTGGAATACACAGCTCAGCTAATTATGCAAAAGAGTGATGTTTTGAAGTGTA	chr1L	1553744440	1	9.88e-28	Plus	36:C>T	0	0	0	0	0	0	0	-	0	0	0	0	0	0	0	0	0	-	0	-	0	0	0	0	-	0	0	0	0	0	0	0	-	-	0	-	0	0	0	0
D05755	13866733	TGCAGTGGCGGCTTGCCCTTGTCCTCATTGCTGTATTCCCTGTTGTTGTTGCAGCCACTGTTTTGCAGG	TGCAGTGGCGTCTTGCCCTTGTCCTCATTGCTGTATTCCCTGTTGTTGTTGCAGCCACTGTTTTGCAGG	chr5	974221485	1	9.88e-28	Minus	10:G>T	1	1	-	1	1	2	1	0	1	-	1	1	1	1	1	-	1	1	1	1	1	1	1	-	-	1	1	1	0	1	1	1	1	1	1	1	1	1	1	-
D05762	3518701	TGCAGTGGGTAGACACAAGTAGCTCCAAGAGCTCCCGAAACCGTTCCACAGCCGAGTTGAACTAGAGCA	TGCAGTGGGTAGACACAAGTAGCTCCAAGAGCTCCCGAAACTGTTCCACAGCCGAGTTGAACTAGAGCA	chr6	1261375154	1	9.88e-28	Plus	41:C>T	0	0	0	0	0	0	0	0	0	-	0	0	0	0	0	0	0	0	-	0	-	0	0	0	0	0	0	0	0	0	0	0	-	-	0	-	0	0	2	-
D05779	13865579	TGCAGTGTGTCTTTGCACAGCCCTTAGAGCTAGCATTTTGGGGATAAATCTCAACCTTCCTATCTCACT	TGCAGTGTGTCTTTGCACAGCCCTTAGAGCTAGTATTTTGGGGATAAATCTCAACCTTCCTATCTCACT	chr4	980264274	1	9.88e-28	Minus	33:C>T	0	0	0	0	0	0	0	0	0	0	-	0	0	0	-	0	0	0	0	0	0	0	-	0	0	0	0	-	0	0	0	0	0	-	0	-	0	-	0	-
D05782	18318962	TGCAGTGTTCTGCTTCCATTTTTTATTGTTCTCATGCTTGTGTGGTGCTGTTGGTGGCCATCTTGGCCC	TGCAGTGTTCTGCTTCCATTTTTTATTGTTCTCATACTTGTGTGGTGCTGTTGGTGGCCATCTTGGCCC	chr1L	1221249201	1	9.88e-28	Minus	35:G>A	0	0	0	0	0	2	0	-	-	0	0	0	0	0	0	-	0	0	0	0	0	2	0	0	0	-	0	-	1	0	0	0	0	-	0	-	0	0	0	-
D05783	18318962	TGCAGTGTTCTGCTTCCATTTTTTATTGTTCTCATGCTTGTGTGGTGCTGTTGGTGGCCATCTTGGCCC	TGCAGTGTTCTGCTTCCATTTTTTATTGTTCTCATGCTTGTGTGGTGCTGTTAGTGGCCATCTTGGCCC	chr1L	1221249184	1	9.88e-28	Minus	52:G>A	0	0	0	0	0	0	0	-	-	0	0	0	0	0	0	-	0	0	0	0	0	2	0	0	0	-	0	-	-	0	0	0	0	-	0	-	0	0	0	-
D05792	39978023	TGCAGTTACTGGTGAAGGAATTGAAGGCTTCTTCAAAGCTGTTGATGCTAGTGCAGAGGAATACATGGA	TGCAGTTACTGGTGAAGGAATTGAAGGCTTCTTCAAGGCTGTTGATGCTAGTGCAGAGGAATACATGGA	chr3	930845868	1	9.88e-28	Minus	36:A>G	0	0	0	0	0	0	0	0	0	0	-	0	0	0	0	0	0	0	0	0	0	0	0	0	0	-	0	0	0	0	0	0	0	-	0	-	2	0	0	-
D05811	18320411	TGCAGTTCCTCTGCCTACTGGTGAGGTTGATTCTGCTACCATAAATCCAATTCCTACTTCTGGTCATCA	TGCAGTTCCTCTGCCTACTGGTGAGGTTGATTCTGCTACCATAAATCCAATTCCTACTTCTGATCATCA	chr3	889130508	1	9.88e-28	Minus	62:G>A	0	-	0	0	0	0	0	0	0	0	0	0	0	0	0	0	2	0	-	-	-	-	0	-	0	-	-	-	0	0	0	0	0	0	-	-	0	0	0	0
D05814	3523332	TGCAGTTCTAAATAGCATGACTCGGTTTCCTTCAAAAAGAAGCACATCCCACACCCGAAGAACTGAAGC	TGCAGTTCTAAATAGCATGACTCTGTTTCCTTCAAAAAGAAGCACATCCCACACCCGAAGAACTGAAGC	chr3	14887687	1	9.88e-28	Plus	23:G>T	0	0	0	0	0	0	0	0	0	2	0	0	0	0	-	0	0	2	0	0	1	0	2	0	0	0	2	0	2	0	0	0	0	0	0	0	0	0	0	0
D05815	3523332	TGCAGTTCTAAATAGCATGACTCGGTTTCCTTCAAAAAGAAGCACATCCCACACCCGAAGAACTGAAGC	TGCAGTTCTAAATAGCATGACTCGATTTCCTTCAAAAAGAAGCACATCCCACACCCGAAGAACTGAAGC	chr3	14887688	1	9.88e-28	Plus	24:G>A	0	0	0	0	0	0	2	2	0	0	2	0	2	0	-	0	0	0	0	0	-	0	0	0	0	0	0	0	0	2	0	2	0	0	2	0	0	2	0	0
D05818	39974684	TGCAGTTCTTCCAAAACAACTGTCAGAGAATTATGATCACGTCAGAGGATTCGAAAATTCGCATATTTG	TGCAGTTCTTCCAAAACAACTGTCAGAAAATTATGATCACGTCAGAGGATTCGAAAATTCGCATATTTG	chr6	1210673976	1	9.88e-28	Plus	27:G>A	0	0	0	2	0	0	0	0	0	0	0	0	0	-	0	0	0	2	0	0	0	-	0	0	0	0	-	-	0	0	0	-	-	-	0	0	0	0	0	0
D05819	39974684	TGCAGTTCTTCCAAAACAACTGTCAGAGAATTATGATCACGTCAGAGGATTCGAAAATTCGCATATTTG	TGCAGTTCTTCCAAAACAACTGTCAGAGAATTATGATCACGTCAGAGGATTCAAAAATTCGCATATTTG	chr6	1210674001	1	9.88e-28	Plus	52:G>A	0	0	0	0	0	0	2	0	0	0	0	0	0	-	0	0	0	0	0	0	0	-	2	0	0	0	-	-	0	2	0	-	-	-	0	0	0	0	0	0
D05821	39978057	TGCAGTTCTTGTTGTTGGGAGGCTGTAAAAGGCTCACTGAATTGCCTGAGAACATGGGAGAATTGGTTA	TGCAGTTCTTGATGTTGGGAGGCTGTAAAAGGCTCACTGAATTGCCTGAGAACATGGGAGAATTGGTTA	chr2	310321313	1	9.88e-28	Minus	11:T>A	0	-	0	0	0	0	0	0	0	0	0	0	0	-	0	-	0	0	-	0	0	0	0	0	0	0	0	-	0	0	0	0	0	-	0	0	0	0	0	-
D05834	3522181	TGCAGTTGCAACCTGGTAAAGTAAAACGACTCTTGACAGTTTCTAATGGAAAGCTAATAGCGTGAGTCG	TGCAGTTGCAACCTGGTAAAGTAAAACGACTCTTGACAGTTTCTAATGGAAAGCTAATAGCGTGAGTTG	chr2	813241162	1	4.6e-26	Plus	67:C>T	0	0	0	0	0	0	1	-	2	0	1	0	0	0	0	-	0	0	0	0	-	0	-	0	0	0	0	-	0	0	-	2	0	0	2	1	0	0	0	0
D05847	39979339	TGCAGTTGGATGCTTGCGTGCCATTAGCACAATACTTGAATCAGTGAGCAGTCTTCCCCAAATTTTTGT	TGCAGTTGGATGCTTGCGTGCGATTAGCACAATACTTGAATCAGTGAGCAGTCTTCCCCAAATTTTTGT	chr3	9533748	1	9.88e-28	Plus	21:C>G	0	-	0	0	0	0	0	-	0	0	0	0	0	-	-	-	0	0	-	0	0	0	0	0	0	-	-	0	0	0	-	0	0	0	-	0	0	0	0	-
D05848	3530467	TGCAGTTGGATTCTGAAGAAACAGAGAAATTTGAAAAAGAGAAACTTCTCAGTGGGCCGGACAACAAGT	TGCAGTTGGATTCTGAAGAAACAGAGAAATTTGAAAAAGAGAAACTTCTCAGTGAGCCGGACAACAAGT	chr2	386658327	1	9.88e-28	Minus	54:G>A	0	0	-	0	0	1	-	-	0	0	0	0	0	0	0	0	0	0	-	0	-	0	1	0	0	0	-	0	0	0	0	0	0	0	0	-	0	0	0	1
D05850	3521554	TGCAGTTGGGAAGCGGAAGAAAAAGTCTGAGTCGTTGGATAATATTGACACTGTTGTGTCACAAACCCA	TGCAGTTGGGAAGCGGAAGAAAAAGTCTGAGTCGATGGATAATATTGACACTGTTGTGTCACAAACCCA	chr1L	1628831410	1	9.88e-28	Plus	34:T>A	0	-	-	-	2	0	0	-	0	0	0	2	0	0	0	0	0	0	0	0	-	0	0	0	0	0	0	-	0	0	0	0	0	0	0	0	-	0	-	0
D05874	3520861	TGCAGTTTCAGATAAAATGACTTCAGGAGGAAGGAACAAGAAAAACCTAAAGATCTTGATTGTATTCCA	TGCAGTTTCAGATAAAATGACTTCAGGAGGAAGGAACAAGAAAAACCTAAAGATCTTGATTGTATCCAA	chr4	137798018	1	9.88e-28	Minus	65:T>C	2	0	0	0	-	0	0	0	1	0	-	0	0	0	-	0	0	0	0	0	-	0	0	0	0	0	0	0	0	0	0	0	0	-	2	1	0	0	2	0
D05890	3521871	TGCAGTTTGCGATCCCAACTCAATTCATTGCAGGAAGCCTCTGGTGGTGCCCGCATATCAGTAAATGAC	TGCAGTTTGCGATCCCAACTCAATTCATTGCAGGAAGCCTCTGGCGGTGCCCGCATATCAGTAAATGAC	chr4	374408868	1	4.6e-26	Minus	44:T>C	1	1	1	1	1	1	1	1	1	-	1	1	1	2	1	1	1	1	1	0	1	-	-	1	1	1	1	1	1	2	1	1	1	1	1	1	2	-	1	-
D05919	13904258	TGCAGAAAAGTTAGTAAGTCTCAAACCGAAAGATCCAGAGACATACATATTGCTATTGAATGCGTACGA	TGCAGAAAAGTTAGTAAGTCTCAAACCGAAAGATCCAGAGACATACATATTGCTATTGAATGCCTACGA	chr1L	196051643	1	9.88e-28	Minus	63:G>C	0	0	0	0	0	0	-	0	0	0	0	0	0	0	0	0	0	-	0	-	-	0	0	0	0	0	0	-	0	0	0	-	0	0	0	-	0	0	-	0
D05922	32610212	TGCAGAAAATTTTCAGGTATGTTCTAAGAATCCATGTTTCGACTTCACAACACTAGCCAATATTACTGG	TGCAGAAAATTTTCAGGTATGTTCTAAGAATCCATGTTTGGACTTCACAACACTAGCCAATATTACTGG	chr4	234651164	1	9.88e-28	Plus	39:C>G	0	0	0	0	0	0	2	2	0	0	-	0	0	0	0	0	0	0	1	0	2	0	-	0	0	0	0	0	0	0	0	0	-	0	-	0	0	2	-	1
D05933	32609346	TGCAGAAATAAAGGGTGGCTTGTAGCAAAGAAAGAGGCATCTAAAACGATTGGCAAATACAAAATTAGA	TGCAGAAATAAAGGGTGGCTTGTAGCAAAGAAAGAGGCATCTAAAACGATTGGCAGATACAAAATTAGA	chr5	723683065	1	9.88e-28	Plus	55:A>G	0	0	-	0	0	0	-	0	0	0	0	1	0	-	-	-	0	0	0	0	0	0	0	0	0	0	0	0	0	0	0	0	0	0	0	0	0	0	0	-
D05955	13864704	TGCAGAAGCAATTTCTTCATTTAGTCTATCAACCTTTTCCTTTAGATTTTCGATATACTTTGATGCATC	TGCAGAAGCTATTTCTTCATTTAGTCTATCAACCTTTTCCTTTAGATTTTCGATATACTTTGATGCATC	chr1L	391392651	1	4.6e-26	Minus	9:A>T	1	1	1	1	1	1	1	1	1	1	1	1	-	1	1	1	1	1	1	1	1	1	1	-	1	1	2	1	1	1	1	-	1	1	1	1	1	1	1	1
D05974	3520292	TGCAGAATTGTGACACGTACAATCAAAACTGTTGCATCACGTGTACTTAGCAGTAAAACAACATTGTGA	TGCAGAATTGTGACACCTACGATCAAAACTGTTGCATCACGTGTACTTAGCAGTAAAACAACATTGTGA	chr2	107546202	1	9.88e-28	Plus	16:G>C	0	0	0	-	0	0	0	0	-	-	0	0	0	0	0	-	0	0	0	0	0	0	0	-	0	-	-	0	0	0	0	0	0	0	0	-	0	0	0	0
D06031	39972908	TGCAGCAAAAGTACAACCTTCCTCAAAATCAAAATTTCAGAAGGACATTGGGTTCAAAGCTAAGAAGAC	TGCAGCAAAAGTACAACCTTCCTCAAAATCAAAATTTCGGAAGGACATTGGGTTCAAAGCTAAGAAGAC	chr5	46681182	1	9.88e-28	Minus	38:A>G	0	-	0	0	0	-	0	0	0	0	0	0	0	-	0	0	0	0	0	0	-	0	0	0	0	0	0	-	0	0	0	0	0	0	0	0	0	0	0	0
D06041	3527992	TGCAGCACTGTCACCAGAAGATCTCTCAGATACTGAGTGGTATTATTTGGTTTGCATGTCCTTTGTATT	TGCAGCACTGTCACCAGAAGATCTCTCCGATACTGAGTGGTATTATTTGGTTTGCATGTCCTTTGTATT	chr6	1315371624	1	9.88e-28	Plus	27:A>C	0	0	-	2	0	0	0	-	-	0	2	0	0	-	1	0	0	0	0	0	-	0	0	0	0	0	1	0	0	0	-	0	-	0	2	0	0	0	-	1
D06093	13904676	TGCAGCTAGGGCAAAGTCACGTGGGTTACTCTTTCCTTCAACCCTGGACATAGAATAGGCTTCAAATGG	TGCAGCTAGGGCAAAGTCACGTGGGTTACTCTTGCCTTCAACCCTGGACATAGAATAGGCTTCAAATGG	chr1L	1261619462	1	9.88e-28	Minus	33:T>G	0	0	0	0	0	2	0	0	0	0	0	0	0	-	0	1	0	0	0	-	0	0	2	-	0	-	0	0	0	0	0	0	0	0	0	0	0	0	-	0
D06124	39971952	TGCAGCTTGCATTGCTTTGGCTTTGTTTTTGTTTTCTAGGAAGTTTCCATCTTTGAAATTGGTGTTTTT	TGCAGCTTGCATTGCTTTGGCTTTGTTTTTGTTTTCTAGGAATTTTCCATCTTTGAAATTGGTGTTTTT	chr1L	967602437	1	9.88e-28	Minus	42:G>T	0	0	0	0	0	0	0	0	0	0	0	0	0	0	0	0	0	0	0	0	0	0	-	0	0	0	0	0	0	0	0	0	0	-	0	0	0	0	0	0
D06134	3519596	TGCAGGAATGATTAGTCCAAGGCCTATGAATAGTCCTCCTGGTTCTGTTTCACCTTCCGGTGGAAATGG	TGCAGGAATGATTAGTCCAAGGCCTATGAATAGTCCTCCTGGTTCTGTTTCACCTTCTGGTGGAAATGG	chr5	1110489339	1	9.88e-28	Minus	57:C>T	0	0	0	0	0	0	0	0	0	-	-	-	0	0	0	0	0	0	0	2	0	0	0	0	0	0	-	-	0	0	0	0	0	-	2	0	0	0	1	0
D06140	39979846	TGCAGGAGCAATTCGGACAAAAGCCTCCTCGGTGACAAGTTTACTCTGAAAAGTTCCCCAAGTGATCTC	TGCAGGAGCAATTCGGACAAAAGCCTCCTCAGTGACAAGTTTACTCTGAAAAGTTCCCCAAGTGATCTC	chr1L	1781409867	1	9.88e-28	Plus	30:G>A	0	-	-	0	0	0	0	0	0	0	0	0	0	0	-	0	0	0	0	0	-	0	0	-	0	0	0	0	0	0	0	0	0	0	1	0	0	0	0	0
D06211	13904910	TGCAGTATGCTTTGGATTTTGTGTATCTAAGTATAGTAATTTTGTTTTCATCATGGGCAGGTATGAATT	TGCAGTATGCTTTGGATTTTGTGTACCTAAGTATAGTAATTTTGTTTTCATCATGGGCAGGTATGAATT	chr4	529755607	1	9.88e-28	Plus	25:T>C	0	0	-	0	0	0	0	0	0	0	0	0	0	0	-	0	0	0	0	0	0	0	0	0	0	-	0	-	0	0	0	0	0	0	0	0	0	1	0	-
D06212	13904910	TGCAGTATGCTTTGGATTTTGTGTATCTAAGTATAGTGATTTTGTTTTCATCATGGGCAGGTATGAATT	TGCAGTATGCTTTGGATTTTGTGTATCTAAGTATAGTAATTTTGTTTTCATCATGGGCAGGTATGAATT	chr4	529755619	1	4.6e-26	Plus	37:G>A	1	1	-	1	1	1	1	1	1	1	1	1	1	1	0	1	1	1	1	1	1	1	1	1	1	0	1	-	1	1	2	1	1	1	1	1	2	-	1	-
D06217	32609663	TGCAGTCAGCAGCAACAAAAAGAATCTACACCAATGGGGACTAATAATTTAGGAACACATTTGCAATCT	TGCAGTCAACAGCAACAAAAAGAATCTACACCAATGGGGACTAATAATTTAGGAACACATTTGCAATCT	chr3	1075517895	1	9.88e-28	Minus	8:G>A	0	0	-	0	0	0	0	0	1	-	0	0	0	0	0	0	0	0	-	-	0	-	0	0	0	0	0	0	0	0	0	0	0	0	2	2	0	1	-	0
D06234	13904981	TGCAGTGGATGTGTTGAAGGCGATGGTACGGTTGAGTATTCCTACCGAAGCGGGTCATTACGGTGTGTT	TGCAGTGGATGTGCTGAAGGCGATGGTACGGTTGAGTATTCCTACCGAAGCGGGTCATTACGGTGTGTT	chr2	1267439996	1	9.88e-28	Plus	13:T>C	0	0	0	0	0	0	0	0	0	-	-	0	0	-	0	-	0	0	0	2	0	0	-	0	0	0	0	0	-	0	0	0	0	-	0	0	0	0	0	0
D06235	13904981	TGCAGTGGATGTGTTGAAGGCGATGGTACGGTTGAGTATTCCTACCGAAGCGGGTCATTACGGTGTGTT	TGCAGTGGATGTGTTGAAGGCGATGGTACGGTTGAGTATTCCCACCGAAGCGGGTCATTACGCTGTGTT	chr2	1267440025	1	9.88e-28	Plus	42:T>C	0	0	0	0	0	0	0	0	0	-	-	0	0	-	0	-	0	0	0	0	0	0	-	0	0	0	0	0	-	0	0	0	0	-	0	0	0	0	0	0
D06254	32611491	TGCAGTTATTATGTGACATGTGATGAAACAACTATTTGTCCTCGTTGCAACATAGCTATGAACATTGAA	TGCAGTTATTATGTGACATGTGATGAAACAACTATTTGTCCCCGTTGCAACATAGCTATGAACATTGAA	chr3	6998435	1	9.88e-28	Minus	41:T>C	0	-	0	0	0	0	0	0	0	0	0	-	0	0	0	0	0	0	0	0	-	0	0	0	0	0	0	-	0	0	0	0	0	-	0	0	0	0	0	2
D06262	39980859	TGCAGTTCTTATAATTCCCACTTTTGAACTTGATGCTGTCTGTCAAGGAGAAAATATCATATTACAGAT	TGCAGTTCTTATAATTCCCACTTTTGAACTTGACGCTGTCTGTCAAGGAGAAAATATCATATTACAGAT	chr5	729360323	1	5.37e-25	Minus	33:T>C	2	-	0	-	0	0	0	0	0	0	-	0	2	0	0	0	0	0	0	0	-	0	0	0	-	0	0	-	0	0	0	0	0	-	0	-	0	0	0	0
D06269	3517243	TGCAGTTGCGTTTTCTGATGATGCATCCTCCATTGTTGTGTCATCACACAGTCTCACTGGCTGTTCATT	TGCAGTTGCGTTTTCTGATGACGCATCCTCCATTGTTGTGTCATCACACAGTCTCACTGGCTGTTCATT	chr5	390056816	1	9.88e-28	Minus	21:T>C	0	0	0	0	0	0	1	0	0	0	-	0	0	0	0	-	0	0	-	0	0	2	0	0	0	-	-	-	0	0	0	0	0	0	-	0	0	-	0	0
D06273	39967914	TGCAGTTGGCAAGATTGACAGATATAGATCCTATCAAAAATTCATGATTCTTTACAAGGTCTGGTTCAG	TGCAGTTGGCAAGATTGACAGATATATATCCTATCAAAAATTCATGATTCTTTACAAGGTCTGGTTCAG	chr1S	714637958	1	9.88e-28	Minus	26:G>T	0	0	0	0	0	0	0	0	0	0	0	0	0	-	-	0	0	0	-	0	0	0	0	-	0	-	0	0	0	0	0	0	-	2	0	0	0	0	0	-
D06291	32610599	TGCAGTTTTTGTATCAGATATAGTTTACACAAGCATAAAAGGAACTTATGATATCAAACATCCTCCTAT	TGCAGTTTTTGTATCAGATATAGTTTACACAAGCATAAAAGGAACTTATGATATCCAACATCCTCCTAT	chr3	588329149	1	9.88e-28	Minus	55:A>C	0	0	0	0	0	0	0	0	0	0	0	-	0	-	0	-	0	0	-	0	0	-	0	0	0	0	0	0	-	0	2	0	0	-	0	0	0	-	0	0
D06292	32610599	TGCAGTTTTTGTATCAGATATAGTTTACACAAGCATAAAAGGAACTTATGATATCAAACATCCTCCTAT	TGCAGTTTTTGTATCAGATATAGTTTACACAAGCATAAAAGGAACTTATGATATCAATCATCCTCCTAT	chr3	588329147	1	9.88e-28	Minus	57:A>T	0	0	0	0	0	0	0	0	0	0	0	-	0	-	0	-	0	0	-	0	0	-	0	0	0	0	0	0	-	0	0	0	0	-	0	0	0	-	0	0
D06407	32610580	TGCAGTTCCAGCTTCATCCTACAAGGGAAATCACACCCGCCATCAATAAGGATTATTTTTACAGATCGG	TGCAGTTCCAGCTTCATCCTACAAGGGAAATCACACCCGCCATCAATAAGGATTGTTTTTACAGATCGG	chr5	734828608	1	2.29e-23	Plus	54:A>G	0	0	0	0	0	0	0	0	0	0	0	0	0	0	0	0	0	0	0	0	0	0	0	0	0	0	-	0	0	0	0	0	0	0	1	0	0	0	0	0
D06635	32609988	TGCAGAAGGTTCCTGAAAACCTCTGCAACTACTCTGTCATGGCATGGCTTTTTACAGATCGGAAGAGCG	TGCAGAAGGTTCCTGAAAACTTCTGCAACTACTCTGTCATGGCATGGCTTTTTACAGATCGGAAGAGCG	chr4	218145190	1	1.42e-19	Plus	20:C>T	0	0	0	0	0	0	0	0	0	0	0	0	0	0	-	0	0	0	0	-	0	-	0	0	0	0	-	0	0	0	0	0	0	0	0	0	0	0	0	0
D06637	18320573	TGCAGAATAATAAAACTAATGCTGTTTCACAGTTCATTACAGATCGGAAGAGCGGTTCAGCAGGAATGC	TGCAGAATAATAAAACTCATGCTGTTTCACAGTTCATTACAGATCGGAAGAGCGGTTCAGCAGGAATGC	chr2	995409054	1	1.49e-11	Plus	17:A>C	0	0	0	0	0	0	0	0	0	0	-	0	0	0	-	0	0	0	0	0	0	0	2	0	0	0	0	0	0	0	0	0	0	-	0	0	0	0	0	-
D06646	39968431	TGCAGAATTGAGATTGAAGAGAGCACTGTTAGTGGATCCTTTACAGATCGGAAGAGCGGTTCAGCAGGA	TGCAGAATTGAGATTGAAGAGAGCACTGTTAGTGGATCTTTTACAGATCGGAAGAGCGGTTCAGCAGGA	chr6	382904976	1	1.16e-13	Plus	38:C>T	0	0	-	0	0	0	0	-	0	0	-	0	0	-	0	0	0	0	0	0	0	0	0	0	0	0	0	0	0	0	0	-	0	0	-	-	0	0	0	0
D06654	3517109	TGCAGACACCTCCAATGCTTCGAACCCTTTACAGATCGGAAGAGCGGTTCAGCAGGAATGCCGAGACCG	TGCAGACACCTCCAATGCTTTGAACCCTTTACAGATCGGAAGAGCGGTTCAGCAGGAATGCCGAGACCG	contig_5764	317681	1	1.92e-07	Minus	20:C>T	0	-	0	0	0	0	0	0	0	0	0	0	0	1	0	0	0	0	0	-	0	2	-	-	0	1	1	0	0	0	0	1	0	0	0	0	0	0	-	0
D06658	3520095	TGCAGACATCCTACACATTCAAGAGACAAACAATAAATTCCATTACAGATCGGAAGAGCGGTTCAGCAG	TGCAGACATCCTACATATTCAAGAGACAAACAATAAATTCCATTACAGATCGGAAGAGCGGTTCAGCAG	chr1S	12269918	1	1.01e-14	Minus	15:C>T	0	0	0	2	0	0	0	0	0	0	0	0	0	-	0	0	0	0	0	0	0	0	0	0	0	0	0	0	0	0	-	-	0	0	0	-	0	0	0	0
D06660	39968479	TGCAGACATGTTTCGAATACGAAATTTTACAGATCGGAAGAGCGGTTCAGCAGGAATGCCGAGACCGAT	TGCAGACATGTTTTGAATACGAAATTTTACAGATCGGAAGAGCGGTTCAGCAGGAATGCCGAGACCGAT	chr5	53046715	1	2.07e-06	Minus	13:C>T	0	0	0	0	0	0	0	0	0	-	0	0	0	-	0	-	0	0	-	0	0	0	0	0	0	0	0	0	0	0	0	0	1	0	0	0	0	0	0	-
D06668	13868814	TGCAGACGGCCTAGTTGAAGGTGGAAAGTAAGTTTCTCGTTTCTCATGAATTACAGATCGGAAGAGCGG	TGCAGACGGCCTAGTTGAAGGTGGAAAGTAAGTTTCTAGTTTCTAATGAATTACAGATCGGAAGAGCGG	chr2	75115534	1	4.91e-19	Plus	37:C>A	0	-	-	0	0	0	0	0	0	0	0	0	0	-	0	0	0	0	0	0	0	-	0	0	0	-	0	0	0	0	0	0	-	-	-	0	0	0	0	-
D06676	39978313	TGCAGAGAAAAGAAAAGAAAGCATTTGTTACCCATTTATTGATTACAGATCGGAAGAGCGGTTCAGCAG	TGCAGAGAAAAGAAAATAAAGCATTTGTTACCCATTTATTGATTACAGATCGGAAGAGCGGTTCAGCAG	chr3	1387784568	1	1.01e-14	Minus	16:G>T	0	0	0	0	0	0	0	0	-	-	0	0	0	0	0	0	0	0	0	0	0	-	0	0	-	0	0	-	0	0	0	0	0	0	0	0	0	0	-	0
D06702	13911094	TGCAGAGTACAATCCCCAGGCAAGTTTTGTTTATTACAGATCGGAAGAGCGGTTCAGCAGGAATGCCGA	TGCAGAGTACAATCCCCAGGCAAGTTTTATTTATTACAGATCGGAAGAGCGGTTCAGCAGGAATGCCGA	chr2	411797872	1	5.86e-10	Plus	28:G>A	0	0	0	0	0	0	0	0	0	0	0	-	0	-	0	0	0	0	-	0	0	0	0	-	0	0	0	-	0	0	-	0	-	0	0	0	0	-	-	0
D06704	39968654	TGCAGAGTCCAAACACTAAATTACATACATAAAATAAATTACAGATCGGAAGAGCGGTTCAGCAGGAAT	TGCAGAGTCCAAACACTAAATTACATAAATAAAATAAATTACAGATCGGAAGAGCGGTTCAGCAGGAAT	chr4	1370752740	1	1.33e-12	Plus	27:C>A	0	0	0	0	0	0	0	0	1	0	0	0	0	-	0	0	0	0	-	0	-	-	0	0	0	0	0	0	0	0	0	0	0	0	0	0	0	0	0	0
D06711	39975526	TGCAGATAAACTTCGTAAAGACTCGAAGTTTTGGGTTTTACAGATCGGAAGAGCGGTTCAGCAGGAATG	TGCAGATAAACTTCGTGAAGACTCGAAGTTTTGGGTTTTACAGATCGGAAGAGCGGTTCAGCAGGAATG	chr4	1381343973	1	4.46e-12	Minus	16:A>G	0	0	0	0	0	0	0	-	-	0	0	0	0	0	0	0	0	0	-	-	0	0	-	0	0	0	0	0	0	1	0	0	-	0	0	0	0	2	0	0
D06712	13911888	TGCAGATAAACTTGGTGCTTTGCATTTGTTTACAGATCGGAAGAGCGGTTCAGCAGGAATGCCGAGACC	TGCAGATAAACCTGGTGCTTTGCATTTGTTTACAGATCGGAAGAGCGGTTCAGCAGGAATGCCGAGACC	chr1L	1647018525	1	6.24e-08	Plus	11:T>C	0	2	0	0	0	0	0	0	-	0	0	-	0	1	-	0	0	0	0	0	0	0	-	2	0	0	0	0	2	0	-	0	-	0	0	0	-	0	0	0
D06713	32610007	TGCAGATAATCTCAGTGAATAACGTAGGTAGGTTTGTTCGTTGGTTACTTTCTTTTACAGATCGGAAGA	TGCAGATAATCTCAGTGAATAACGTAGGTAGGTTTGTTTGTTGGTTACTTTCTTTTACAGATCGGAAGA	contig_5722	32738	1	3.39e-21	Plus	38:C>T	0	0	-	0	0	0	0	0	0	0	0	0	0	1	0	0	0	0	2	0	0	0	0	0	0	0	-	0	0	0	0	0	0	0	-	-	0	0	0	0
D06714	39978350	TGCAGATACCACTAATGCTTACATTGGATGTTATGTTTCTTTACAGATCGGAAGAGCGGTTCAGCAGGA	TGCAGATACCACTAATGCTGACATTGGATGTTATGTTTCTTTACAGATCGGAAGAGCGGTTCAGCAGGA	chr4	1628257789	1	1.16e-13	Plus	19:T>G	0	-	0	-	1	0	0	0	-	0	0	0	-	-	0	0	0	0	0	0	0	-	-	0	0	0	0	0	-	0	0	0	0	-	0	0	0	0	0	0
D06733	39978369	TGCAGATGATGCCGAGGAACCAATTTCTTTACAGATCGGAAGAGCGGTTCAGCAGGAATGCCGAGACCG	TGCAGATGATGCCGAAGAACCAATTTCTTTACAGATCGGAAGAGCGGTTCAGCAGGAATGCCGAGACCG	chr5	431994949	1	1.92e-07	Minus	15:G>A	0	-	-	-	1	0	0	0	1	0	0	1	0	0	0	0	0	0	0	0	0	0	0	0	0	0	0	0	0	0	2	0	-	0	0	-	0	0	0	0
D06749	39975622	TGCAGATTATAGTTTCAAGGAAATCAATTTTGAAGTGAAATGAAACTTTACAGATCGGAAGAGCGGTTC	TGCAGATTATAGTTTCAATGAAATCAATTTTGAAGTGAAATGAAACTTTACAGATCGGAAGAGCGGTTC	chr4	1058381527	1	2.11e-17	Plus	18:G>T	0	0	0	0	0	0	0	0	0	0	0	0	0	0	0	0	0	0	0	0	0	0	0	-	0	0	0	0	0	0	0	0	-	0	0	0	0	-	0	0
D06763	3522980	TGCAGATTTTTCTCTATTTAGTAAAGAGTTTGTAACTGAAGCTCTCAAGAAATCAGTTACAGATCGGAA	TGCAGATTTTTCTCTATTTAGTAAAGAGTTTGCAACTGAAGCTCTCAAGAAATCAGTTACAGATCGGAA	chr1L	618224343	1	2.79e-22	Plus	32:T>C	0	0	0	0	0	0	0	0	2	0	-	0	0	-	0	-	0	0	0	0	0	0	0	-	0	0	-	-	0	0	0	0	0	0	0	0	0	0	-	0
D06782	13911918	TGCAGCAATTGAATGTTGCAAAGGAAAAGTTACAGATCGGAAGAGCGGTTCAGCAGGAATGCCGAGACC	TGCAGCAATTGAATGTTGCAAAGGAATATTTACAGATCGGAAGAGCGGTTCAGCAGGAATGCCGAGACC	chr1L	1278231666	1	6.24e-08	Minus	26:A>T	0	0	-	0	0	0	0	-	0	0	0	0	0	-	-	-	0	0	0	0	0	0	0	0	0	0	-	0	0	0	0	0	0	0	1	-	0	0	0	-
D06783	13911918	TGCAGCAATTGAATGTTGCAAAGGAAAAGTTACAGATCGGAAGAGCGGTTCAGCAGGAATGCCGAGACC	TGCAGCAATTGAATGTTGCAAAGGAAAAATTACAGATCGGAAGAGCGGTTCAGCAGGAATGCCGAGACC	chr1L	1278231664	1	6.24e-08	Minus	28:G>A	0	0	-	0	0	0	0	-	0	0	0	0	0	-	-	-	0	0	0	0	0	0	0	0	0	0	-	0	0	0	0	0	0	0	-	-	0	0	0	-
D06787	3507674	TGCAGCACATACAACATTTTGAGAGATATAGCAAACAATTACAGATCGGAAGAGCGGTTCAGCAGGAAT	TGCAGCACATACAACATTTCGAGAGATATAGCAAACAATTACAGATCGGAAGAGCGGTTCAGCAGGAAT	contig_4581	107694	1	1.33e-12	Plus	19:T>C	0	0	0	0	0	2	0	0	0	0	-	0	0	2	0	-	0	1	0	0	0	2	0	0	-	0	0	-	0	0	0	0	0	1	0	0	0	-	0	2
D06789	39968985	TGCAGCACCAAATTTAGGCAGACTATCCTTTTTCAAACTTTTACAGATCGGAAGAGCGGTTCAGCAGGA	TGCAGCCCCAAATTTAGGCAGACTATCCTTTTTCAAACTTTTACAGATCGGAAGAGCGGTTCAGCAGGA	chr3	1549102771	1	1.16e-13	Minus	6:A>C	0	0	0	0	-	0	0	0	0	0	0	0	0	0	0	-	0	0	0	0	0	0	0	0	0	0	0	0	0	0	0	0	0	0	0	0	0	0	0	0
D06809	3507266	TGCAGCAGCTGCACCAGATAACTTTTGGACATTGTGGCATTTTACAGATCGGAAGAGCGGTTCAGCAGG	TGCAGAAGCTGCACCAGATAACTTTTGGACATTGTGGCATTTTACAGATCGGAAGAGCGGTTCAGCAGG	chr6	727179989	1	3.42e-14	Minus	5:C>A	0	0	0	0	0	0	2	0	2	0	0	0	2	0	0	1	0	0	-	-	0	0	0	0	0	0	0	0	0	0	0	0	-	0	-	0	0	0	0	0
D06810	18321150	TGCAGCAGGGGATCCATCGCCTTCATCAGAGCCAGTCAATACATCTTTACAGATCGGAAGAGCGGTTCA	TGCAGCAGGGGATCCATCACCTTCATCAGAGCCAGTCAATACATCTTTACAGATCGGAAGAGCGGTTCA	chr2	545502009	1	7.27e-17	Plus	18:G>A	0	0	0	0	0	0	-	0	0	0	-	-	0	-	0	0	0	0	0	0	0	0	0	0	0	0	0	0	0	0	0	0	0	-	-	0	0	0	0	0
D06818	39975779	TGCAGCATCGGGTTTATCGAAGTGAATTACAGATCGGAAGAGCGGTTCAGCAGGAATGCCGAGACCGAT	TGCAGCATCGGGCTTATCGATGTGATTTACAGATCGGAAGAGCGGTTCAGCAGGAATGCCGAGACCGAT	chr2	1631775730	1	2.07e-06	Minus	12:T>C	0	0	0	0	0	0	0	-	0	0	0	0	0	0	0	0	0	0	-	0	0	0	0	0	0	0	-	-	0	0	0	0	0	0	0	0	0	0	0	0
D06849	3523394	TGCAGCCCTTCTTCCATGCGGCGGATACCTGTAACAGACAACTATTTACAGATCGGAAGAGCGGTTCAG	TGCAGCCCTTCTTCCATGTGGCGGATACCTGTAACATACAACTATTTACAGATCGGAAGAGCGGTTCAG	chr1L	462193599	1	2.5e-16	Plus	18:C>T	0	-	-	-	0	0	0	0	-	2	0	0	0	0	0	0	2	0	0	1	0	0	0	0	0	-	-	0	0	0	0	0	2	0	0	-	0	-	0	0
D06864	39975852	TGCAGCGCTCACAATATCAATTCCACATCACAAGAATTATTACAGATCGGAAGAGCGGTTCAGCAGGAA	TGCAGCGCTCACAATATCAATTGCACATCACAAGAATTATTACAGATCGGAAGAGCGGTTCAGCAGGAA	chr2	1630232166	1	3.94e-13	Minus	22:C>G	0	0	0	0	0	0	-	0	0	0	0	0	0	0	0	0	0	0	0	0	0	0	-	0	0	0	0	0	0	0	0	0	0	0	0	-	0	-	0	0
D06866	39975859	TGCAGCGGTGTGAGAGACCTGGTACGATAATATATCGCAAACATGAAAGATCATTTACAGATCGGAAGA	TGCAGCGGTGTGAGAGACCTGGTACGATAATATATAGCAAACATGAAAGATCATTTACAGATCGGAAGA	chr4	326689664	1	3.39e-21	Plus	35:C>A	0	0	0	0	0	0	0	0	0	-	0	0	0	-	0	-	0	0	0	0	0	0	0	0	0	0	0	0	0	0	0	0	0	0	-	0	0	0	0	-
D06875	39975878	TGCAGCTAGTAAGAGTGAACATAAGAAAAACATTACAGATCGGAAGAGCGGTTCAGCAGGAATGCCGAG	TGCAGCCAGTAAGAGTGAACATAAGAAAAACATTACAGATCGGAAGAGCGGTTCAGCAGGAATGCCGAG	chr5	907656344	1	1.92e-09	Plus	6:T>C	0	0	0	0	0	0	0	0	0	0	-	0	0	0	0	0	0	0	0	2	0	0	0	0	0	-	0	0	0	0	0	0	0	0	0	0	0	0	0	0
D06892	32609094	TGCAGCTGCTAAACAAGGATTGGTTCACATAGTTTATTACAGATCGGAAGAGCGGTTCAGCAGGAATGC	TGCAGCTGCTAAACAAGGATTGGTTCAAATAGTTTATTACAGATCGGAAGAGCGGTTCAGCAGGAATGC	chr6	804331374	1	1.49e-11	Plus	27:C>A	0	0	0	0	0	0	0	0	0	0	0	-	0	0	-	0	0	0	0	0	-	0	0	0	0	0	0	0	0	0	0	0	0	-	0	-	0	0	0	-
D06893	32609094	TGCAGCTGCTAAACAAGGATTGGTTCACATAGTTTATTACAGATCGGAAGAGCGGTTCAGCAGGAATGC	TGCAGCTGCTAAACAAGGATTGGTTCACATAGTTTTTTACAGATCGGAAGAGCGGTTCAGCAGGAATGC	chr6	804331382	1	1.49e-11	Plus	35:A>T	0	0	0	0	0	0	0	0	0	0	0	-	0	0	-	0	0	0	0	0	-	0	0	0	0	0	0	0	0	0	0	0	0	-	0	-	0	0	0	-
D06898	39979531	TGCAGCTGGTGCAGCAATAAGGGTACCTGTTGTTTATTACAGATCGGAAGAGCGGTTCAGCAGGAATGC	TGCAGCTGGTGCAGCAATAAGGGTACCTGATGTTTATTACAGATCGGAAGAGCGGTTCAGCAGGAATGC	contig_6543	193383	1	1.49e-11	Minus	29:T>A	0	0	0	0	0	0	0	0	0	0	0	0	0	-	0	0	0	0	1	0	0	-	0	0	0	0	-	0	0	0	0	0	0	0	0	0	0	-	0	-
D06928	13868321	TGCAGGAATTCTGGGATGGGACAAGCGCTTCATAGCCTACAAATTTTACAGATCGGAAGAGCGGTTCAG	TGCAGGAATTCTGGGATGGGACAATCGCTTCATAGCCTACAAATTTTACAGATCGGAAGAGCGGTTCAG	chr6	1156433147	1	2.5e-16	Minus	24:G>T	0	0	-	0	0	0	0	0	-	-	-	0	0	-	-	0	0	0	0	0	0	0	0	0	0	-	0	0	0	0	0	0	0	0	0	0	0	0	0	0
D06930	39976004	TGCAGGACCTAAGTATGTTTCGATCCTTTACAGATCGGAAGAGCGGTTCAGCAGGAATGCCGAGACCGA	TGCAGTACCTAAGTATGATTTGATCCTTTACAGATCGGAAGAGCGGTTCAGCAGGAATGCCGAGACCGA	chr1L	1342158550	1	5.77e-07	Minus	5:G>T	2	0	0	0	0	0	2	-	0	0	0	0	0	0	-	0	0	0	2	0	-	0	-	0	0	0	0	-	0	0	0	0	-	0	0	0	0	0	0	2
D06937	39978546	TGCAGGAGGTCGCCAAAACAAATTCAGAAAGTTTTACAGATCGGAAGAGCGGTTCAGCAGGAATGCCGA	TGCAGGAGGGCGCCAAAACAAATTCAGAAAGTTTTACAGATCGGAAGAGCGGTTCAGCAGGAATGCCGA	chr3	1336371394	1	5.86e-10	Minus	9:T>G	0	0	0	0	0	0	0	0	0	0	-	0	0	0	0	0	0	0	0	0	0	0	0	0	2	0	0	0	0	0	0	0	0	0	-	0	0	0	0	-
D06941	3520385	TGCAGGATGCTGTAGTCTCCTTTCCCTTGTACACCGAGGCTTTACAGATCGGAAGAGCGGTTCAGCAGG	TGCAGGATGCTGTAGTCTCTTTTCCCTTGTACACCGAGGCTTTACAGATCGGAAGAGCGGTTCAGCAGG	chr3	214383242	1	3.42e-14	Minus	19:C>T	0	0	2	0	2	0	0	0	-	0	-	0	0	1	-	0	0	0	0	0	0	0	-	1	0	0	0	0	0	0	-	0	0	0	0	0	0	0	0	0
D06949	13911213	TGCAGGCTGTTGCTGAGCTGATGGAACAATTACAGATCGGAAGAGCGGTTCAGCAGGAATGCCGAGACC	TGCAGGCTGTTGCCGAGCTGATGGAACAATTACAGATCGGAAGAGCGGTTCAGCAGGAATGCCGAGACC	chr5	795170068	1	6.24e-08	Minus	13:T>C	0	0	0	0	0	0	0	2	0	0	0	0	0	0	0	-	0	0	0	0	0	0	0	-	0	-	0	0	0	0	-	-	0	-	0	0	0	0	0	-
D06950	39978795	TGCAGGCTTCCGGAGAAAACGTGTGAACAAGGTAGACCATAGTTTGATACACATTACAGATCGGAAGAG	TGCAGGCTTCCGGAGAAAACGTGTGAACAAGGTAGACTATAGTTTGATACACATTACAGATCGGAAGAG	chr6	829721468	1	1.18e-20	Minus	37:C>T	0	0	0	0	0	0	0	0	0	2	-	0	0	0	-	0	0	0	0	0	0	0	-	0	0	0	0	0	0	1	-	0	0	0	0	0	0	-	-	0
D06965	3519325	TGCAGGGTTGACAATTCCCCTCAAAATAATAAGTGATTACAGATCGGAAGAGCGGTTCAGCAGGAATGC	TGCAGGGTTGAGAATTCCCCTCAAAATAATAAGTGATTACAGATCGGAAGAGCGGTTCAGCAGGAATGC	contig_4116	41723	1	1.49e-11	Plus	11:C>G	0	0	0	0	0	0	0	0	1	0	-	0	0	1	0	0	0	0	0	0	0	0	0	-	-	0	0	0	0	0	-	0	0	0	-	0	0	0	-	0
D06976	13913315	TGCAGGTACTTTACATCGAATTGGTTACGCCTTTGCCTTCGGTGCTGAAAAGCTTACAGATCGGAAGAG	TGCAGGTACTTTACATCGAATTGGTTATGCCTTTGCCTTCGGTGCTGAAAAGCTTACAGATCGGAAGAG	chr2	867934440	1	1.18e-20	Plus	27:C>T	0	0	1	1	2	0	0	-	0	0	2	1	0	0	0	-	0	0	0	0	0	0	0	-	0	0	0	0	0	0	-	2	0	0	2	0	0	0	0	0
D06991	32610080	TGCAGGTCTTTTATACTTTACTCTCTTCTCAGCTGTCTTTTTACAGATCGGAAGAGCGGTTCAGCAGGA	TGCAGGTCTTTTATACTTTACTCTCTTCTCAGCAGTCTTTTTACAGATCGGAAGAGCGGTTCAGCAGGA	chr4	767358296	1	1.16e-13	Minus	33:T>A	0	-	0	0	0	0	0	0	0	-	0	0	0	0	1	-	0	-	0	0	0	0	1	0	0	0	0	0	0	0	-	0	0	-	-	1	0	-	-	0
D06992	39969786	TGCAGGTGATCCGTATCCAACGGGGATAATGGTTTGTAGTTTTTTTACAGATCGGAAGAGCGGTTCAGC	TGCAGGTGATCCGTATCCAACGGGGATAATGGTTTTTAGTTTTTTTACAGATCGGAAGAGCGGTTCAGC	chr6	1075855738	1	8.59e-16	Plus	35:G>T	0	0	0	0	0	0	0	0	0	0	0	0	0	0	0	0	0	0	0	-	0	0	0	0	0	0	0	0	0	0	0	0	0	-	0	0	0	0	0	0
D06994	39979581	TGCAGGTGCACGCAAGCGGTGTTCACGAGTGACCAAACTGTTACAGATCGGAAGAGCGGTTCAGCAGGA	TGCAGGTGCACGCAAGCGGTGTTCACCAGTGACCAAACTGTTACAGATCGGAAGAGCGGTTCAGCAGGA	chr3	691128689	1	1.16e-13	Minus	26:G>C	0	0	0	0	0	0	0	0	0	0	0	0	0	0	0	0	0	0	0	0	-	0	0	0	1	0	0	-	0	0	0	0	0	-	0	-	0	0	1	0
D07002	13912467	TGCAGGTGTTATTTGTTCTTGCTTTCGTCGGTAGTTTTTTACAGATCGGAAGAGCGGTTCAGCAGGAAT	TGCAGGTGTTATTTGTTCTTGCTTTCTTCGGTAGTTTTTTACAGATCGGAAGAGCGGTTCAGCAGGAAT	chr5	446275793	1	1.33e-12	Plus	26:G>T	2	0	0	0	0	0	1	0	0	0	-	0	0	0	0	0	0	0	0	0	-	0	0	0	0	0	0	0	0	0	0	0	0	0	0	-	0	0	0	0
D07009	13912793	TGCAGGTTTGGGATTTGAAGACTACAGACTGCATACAAACATTTACAGATCGGAAGAGCGGTTCAGCAG	TGCAGGTTTGGGACTTGAAGACTACAGACTGCATACAAACATTTACAGATCGGAAGAGCGGTTCAGCAG	chr2	246838615	1	1.01e-14	Minus	13:T>C	0	0	0	-	0	0	0	0	0	0	0	0	0	2	-	0	0	0	0	1	0	-	0	0	2	0	0	0	0	0	0	0	-	-	0	-	0	0	-	-
D07019	3524732	TGCAGTAAATCGTTCATTACACTAACATTGTACACAAAAAACGTTACAGATCGGAAGAGCGGTTCAGCA	TGCAGTAAATCGTTCATTACACTAACATTGTACAGAAAAAACGTTACAGATCGGAAGAGCGGTTCAGCA	chr3	731995225	1	6.37e-12	Minus	34:C>G	0	-	-	-	0	0	0	-	0	0	1	0	0	0	0	0	0	0	-	0	-	0	0	0	0	0	-	0	0	0	0	0	0	0	0	0	0	0	0	0
D07021	3522180	TGCAGTAAATTAGACCTATAGTTGAAAATTCTCAAATTCCATCAAACATTACAGATCGGAAGAGCGGTT	TGCAGTAAATTAGACCTATAGTTGAAAATTCTCAAATTTCATCAAACATTACAGATCGGAAGAGCGGTT	chr2	143893026	1	5.87e-18	Plus	38:C>T	0	0	1	2	1	0	0	0	1	0	1	2	0	0	0	0	0	-	-	0	0	0	0	-	0	0	0	-	0	0	-	0	0	-	0	1	0	-	-	0
D07047	22856251	TGCAGTCAACAGAGAAATTTATAAATCATTTACAGATCGGAAGAGCGGTTCAGCAGGAATGCCGAGACC	TGCAGTCAACAGAGAAATTTATAAATCCTTTACAGATCGGAAGAGCGGTTCAGCAGGAATGCCGAGACC	chr2	246839683	1	6.24e-08	Plus	27:A>C	0	-	0	0	0	0	0	0	-	0	0	0	0	0	0	0	0	0	0	0	0	0	1	0	0	0	0	0	0	0	0	0	-	-	0	0	0	-	0	0
D07049	3518387	TGCAGTCACACAATATCTGCCGCCACGCACTCAAACTTTCATCACCGTTTGATTACAGATCGGAAGAGC	TGCAGTCACACAATATCGGCCGCCACGCACTCAAACTTTCATCACCGTTTGATTACAGATCGGAAGAGC	chr1L	667411543	1	4.09e-20	Minus	17:T>G	0	0	0	-	0	0	0	0	0	0	-	0	0	0	0	0	0	0	0	0	0	-	-	0	0	0	0	-	0	0	0	-	0	-	0	0	0	0	0	0
D07050	3518387	TGCAGTCACACAATATCTGCCGCCACGCACTCAAACTTTCATCACCGTTTGATTACAGATCGGAAGAGC	TGCAGTCACACAATATCTGCCGCCATGCACTCAAACTTTCATCACCGTTTGATTACAGATCGGAAGAGC	chr1L	667411535	1	4.09e-20	Minus	25:C>T	0	0	0	-	0	0	0	0	0	0	-	0	0	0	0	0	0	0	0	0	0	-	-	0	0	0	0	-	0	0	0	-	0	-	0	0	0	0	0	0
D07058	39979607	TGCAGTCATGGAGCTAATATAGCTGATGCTGAACAAATGATCATGATATTCAAGTGTTTACAGATCGGA	TGCAGTCATGGAGCTAATATAGCTGATGCTGAACAAATGATCATGATATTCAACTGTTTACAGATCGGA	chr5	95271864	1	3.73e-21	Minus	53:G>C	-	-	0	0	0	0	0	0	0	0	0	0	0	0	0	0	0	0	0	0	0	0	0	0	0	-	0	0	0	2	-	0	0	0	-	-	0	0	0	-
D07075	22857797	TGCAGTCTGTTGATGTTTTCCATTGGATGAAGATCAGTTAGCTTGTCTTTTACAGATCGGAAGAGCGGT	TGCAGTCTGTTGATGTTTTCTATTGGATGAAGATCAGTTAGCTTGTCTTTTACAGATCGGAAGAGCGGT	chr1L	979083997	1	1.7e-18	Plus	20:C>T	0	0	2	1	2	0	0	0	0	0	0	0	0	0	0	0	0	0	0	0	0	0	0	0	0	0	0	0	0	0	2	0	0	0	0	0	0	0	0	0
D07096	39976421	TGCAGTGGCCATTTTGTTTCTCACTGTTGTAGAAATTGTTACAGATCGGAAGAGCGGTTCAGCAGGAAT	TGCAGTCGCCATTTTGTTTCTCACTGTTGTAGAAATTGTTACAGATCGGAAGAGCGGTTCAGCAGGAAT	chr3	1429618453	1	1.33e-12	Plus	6:G>C	0	0	0	0	0	0	0	0	0	0	-	0	0	0	0	-	0	0	0	0	0	0	0	0	0	0	0	-	0	0	1	0	0	0	0	0	0	0	-	0
D07114	39978728	TGCAGTTATAGACACTCTCGTTACCACATAATTTTTTCCATAAAAATATTTACAGATCGGAAGAGCGGT	TGCAGTTATAGACACTCTCGTTACTACATAATTTTTTCCATAAAAATATTTACAGATCGGAAGAGCGGT	chr1S	1347215510	1	1.7e-18	Minus	24:C>T	0	0	0	0	0	0	0	0	0	0	0	0	0	-	0	0	0	0	0	0	0	0	0	0	0	0	0	0	0	0	0	0	2	0	0	0	0	0	1	1
D07119	39976490	TGCAGTTCATGTTTATCAATGCCAGTCAAATCAAAATGTGTTACAGATCGGAAGAGCGGTTCAGCAGGA	TGCAGTTCATGTATATCAATGCCAGTCAAATCAAAATGTGTTACAGATCGGAAGAGCGGTTCAGCAGGA	chr1S	315459095	1	1.16e-13	Plus	12:T>A	0	0	-	0	0	0	0	0	0	0	-	0	0	0	0	-	0	0	0	0	0	0	0	0	0	0	0	0	0	0	0	0	0	0	0	0	0	0	0	0
D07130	13912055	TGCAGTTGCAATGGGGGAGGAGGGTGATGTTGTTGTAAGTTTTACAGATCGGAAGAGCGGTTCAGCAGG	TGCAGTTGCAATGGGGGAAGAGGGTGATGTTGTTGTAAGTTTTACAGATCGGAAGAGCGGTTCAGCAGG	chr6	1317117833	1	3.42e-14	Plus	18:G>A	0	0	0	0	0	2	0	0	2	0	0	1	0	0	0	2	0	0	2	0	-	2	0	0	0	2	0	0	2	0	0	0	0	0	0	0	0	2	0	0
D07143	3523926	TGCAGTTTCGTGGCTGCCTTCTTTATCATTGCCTATTTTTTATTTTACAGATCGGAAGAGCGGTTCAGC	TGCAGTTTCGTGGCTGCCTTCTTTATCACTGCCTATTTTTTATTTTACAGATCGGAAGAGCGGTTCAGC	chr4	271442627	1	4e-14	Plus	28:T>C	1	-	0	2	2	1	1	1	0	1	1	2	2	-	1	1	1	2	1	1	-	1	1	1	0	1	1	2	1	1	0	1	1	1	1	1	1	1	1	1
D07165	32609016	TGCAGAAGTTTGGAGATTTAGAAATTTGATGTTCTGTTATTATGTTACAGATCGGAAGAGCGGTTCAGC	TGCAGAAGTTTGCAGATTTAGAAATTTGATGTTCTGTTATTATGTTACAGATCGGAAGAGCGGTTCAGC	chr6	770947094	1	8.59e-16	Plus	12:G>C	-	0	0	-	0	0	0	0	0	-	0	-	0	0	0	0	0	0	0	0	0	-	0	0	0	0	0	0	0	0	-	0	-	0	0	-	0	0	-	0
D07170	13905753	TGCAGAAGAAGACGTAATTATTTTATGAACTAGAAAATACTTACAGATCGGAAGAGCGGTTCAGCAGGA	TGCAGAAGAAGACGTATTTATTTTATGAACTAGAAAATACTTACAGATCGGAAGAGCGGTTCAGCAGGA	chr6	1116506418	1	1.16e-13	Minus	16:A>T	0	0	-	0	0	0	0	0	0	0	0	-	0	0	0	0	0	0	-	0	0	0	-	0	0	0	-	-	0	0	-	0	0	0	0	0	0	0	-	0
D07198	3508399	TGCAGAGTGCAGACAGTAAAAGTTAGTCAAGAACAAGATTACAGATCGGAAGAGCGGTTCAGCAGGAAT	TGCAGAGCGCAGACAGTAAAAGTTAGTCAAGAACAAGATTACAGATCGGAAGAGCGGTTCAGCAGGAAT	chr5	1098592352	1	1.33e-12	Minus	7:T>C	0	0	0	-	0	-	0	0	0	0	0	-	0	0	0	-	0	0	0	-	0	-	0	0	-	-	0	0	0	0	0	0	0	0	-	0	0	0	0	-
D07222	39968898	TGCAGCAAACTACACTGTCCTGTTACTTTTTATTACAGATCGGAAGAGCGGTTCAGCAGGAATGCCGAG	TGCAGAAAACTACACTGTCCTGTTACTTTTTATTACAGATCGGAAGAGCGGTTCAGCAGGAATGCCGAG	chr2	1122135302	1	1.92e-09	Plus	5:C>A	0	0	0	0	0	0	-	0	0	-	0	0	0	-	-	-	0	0	0	0	0	0	0	0	0	-	0	-	0	0	0	0	0	0	0	-	0	-	0	0
D07223	39968898	TGCAGCAAACTACACTGTCCTGTTACTTTTTATTACAGATCGGAAGAGCGGTTCAGCAGGAATGCCGAG	TGCAGCAAACTACATTGTCCTGTTACTTTTTATTACAGATCGGAAGAGCGGTTCAGCAGGAATGCCGAG	chr2	1122135311	1	1.92e-09	Plus	14:C>T	0	0	0	0	0	0	-	0	0	-	0	0	0	-	-	-	0	0	0	0	0	0	0	0	0	1	0	-	0	0	0	0	0	0	0	-	0	-	0	0
D07235	39975791	TGCAGCATGTTCTCTTACCTAGACAAAAGATTACAGATCGGAAGAGCGGTTCAGCAGGAATGCCGAGAC	TGCAGCATGTTCTCTTACCTAAACAAAAGATTACAGATCGGAAGAGCGGTTCAGCAGGAATGCCGAGAC	chr2	308081350	1	1.98e-08	Minus	21:G>A	0	0	0	0	0	0	0	-	0	0	0	0	0	0	0	0	0	-	0	0	-	0	0	2	0	0	0	-	0	2	2	0	0	0	0	0	0	0	0	0
D07263	32609102	TGCAGGAAGTTGAAGACACTGGATATGCTGTGATGAAAAAGCCTTACAGATCGGAAGAGCGGTTCAGCA	TGCAGGAAGTTGAAGACACTGGATATGCTGTGACGAAAAAGCCTTACAGATCGGAAGAGCGGTTCAGCA	chr1L	1430503328	1	2.94e-15	Minus	33:T>C	0	1	2	0	0	0	0	0	0	0	0	-	0	1	0	0	0	0	0	0	0	0	0	0	0	0	0	0	0	0	0	2	0	0	0	0	2	0	0	-
D07277	13909736	TGCAGGTAATTTCACATATATTTACCGTTGTGTATGCTGAAAGAATTACAGATCGGAAGAGCGGTTCAG	TGCAGGTAATTTCACATATATTTACCGTTGTGTATACTGAAAGAATTACAGATCGGAAGAGCGGTTCAG	chr2	86978373	1	2.5e-16	Minus	35:G>A	0	0	0	0	0	0	0	-	0	0	0	0	2	0	-	0	0	0	-	0	0	0	0	-	0	-	0	0	0	0	0	0	-	0	0	-	0	0	0	0
D07294	32610092	TGCAGTATCTTCATCGTTATATAAGCCCCAAGAAGTTTACAGATCGGAAGAGCGGTTCAGCAGGAATGC	TGCAGTATCTTCATCGTTATATTAGCCCCAAGAAGTTTACAGATCGGAAGAGCGGTTCAGCAGGAATGC	chr2	1069491780	1	1.49e-11	Plus	22:A>T	0	0	0	0	0	0	0	0	0	0	0	0	0	0	0	0	0	-	0	0	0	0	0	-	0	0	0	0	0	0	-	0	0	0	0	0	0	0	0	-
D07301	3521613	TGCAGTGAAATTTGAGATAGACACAATGTTTTATTGAATTGAGGGGTCTCTTTTTACAGATCGGAAGAG	TGCAGTGAAATTTGAGATAGACCCAATGTTTTATTGAATTGAGGGGTCTCTTTTTACAGATCGGAAGAG	chr6	868095964	1	1.18e-20	Plus	22:A>C	0	0	0	0	0	0	0	0	0	-	0	0	0	0	-	0	0	0	0	0	0	0	0	-	0	0	0	0	0	0	0	0	0	0	0	0	0	1	2	0
D07323	39976499	TGCAGTTCTCTTCCAGAATGTTCTAATTTACATATTTCTATGTATTTTTACAGATCGGAAGAGCGGTTC	TGCAGTTCTCTTCCAGAATGATCTAATTTACATATTTCTATGTATTTTTACAGATCGGAAGAGCGGTTC	chr6	290333909	1	2.11e-17	Minus	20:T>A	0	0	0	2	0	-	0	-	0	0	0	0	0	0	-	-	0	0	0	0	0	0	0	0	0	0	0	0	0	0	0	0	0	-	0	0	0	-	0	0
D07419	32610876	TGCAGTTCATTCATTTCTCCGTAGCTTTTACAGATCGGAAGAGCGGTTCAGCAGGAATGCCGAGACCGA	TGCAGTTCATTCATTTCTCCTTAGCTTTTACAGATCGGAAGAGCGGTTCAGCAGGAATGCCGAGACCGA	chr1L	1071505863	1	5.77e-07	Plus	20:G>T	0	0	-	0	-	0	0	-	0	0	2	0	0	0	-	0	0	0	0	-	0	-	-	0	0	-	0	0	0	0	0	0	-	0	0	0	0	-	-	0
D07509	13868092	TGCAGCAAGTGCCATAAACCCTTCATGCCATACACCTTCAAGGACAACCTGGGAATTTTTTACAGATCG	TGCAGCAAGTGCCATAAACCCTTCGTGCCATACACCTTCAAGGACAACCTGGGAATTTTTTACAGATCG	chr1L	1173960598	1	6.57e-24	Minus	24:A>G	0	-	0	0	0	2	1	0	-	0	-	0	0	0	0	1	0	0	0	0	0	0	0	0	0	0	2	0	0	0	0	-	2	0	2	0	0	0	0	0
D07514	13905168	TGCAGGTCAGCATCCATAAGTGAGCAAAGAATAGAACACAAAACTGGATATTATATTTCAACAGGCAAA	TGCAGGTCAGCATCCATGAGTGAGCAAAGAATAGAACACAAAACTGGATATTATATTTCAACAGGCAAA	contig_9166	16579	1	9.88e-28	Minus	17:A>G	0	0	-	0	0	2	0	0	0	0	0	0	0	0	0	0	0	-	0	0	0	0	0	0	0	0	0	-	0	0	-	-	0	0	-	0	-	0	0	0
D07515	13905168	TGCAGGTCAGCATCCATAAGTGAGCAAAGAATAGAACACAAAACTGGATATTATATTTCAACAGGCAAA	TGCAGGTCAGCATCCATAAGTGAGCAAAGAATAGAACACAAAACTGTATATTTTATTTCAACAGGCAAA	contig_9166	16550	1	9.88e-28	Minus	46:G>T	0	0	1	0	2	0	0	0	0	0	0	0	0	0	0	0	0	-	0	0	0	0	0	0	0	0	0	-	0	0	1	-	0	0	-	0	-	0	0	0
D07517	3517215	TGCAGAAAAAAGCATGAGCAGAGAAGATGCAATTCAATGTTGCAATGAAGAGCAAATGCTTGTTTGTGG	TGCAGAAAAAAGCATGAGCAGGGAAGATGCAACTCAATGTTGCAATGAAGAGCAAATGCTTGTTTGTGG	chr6	1194878470	1	9.88e-28	Plus	21:A>G	0	0	0	0	0	0	0	0	0	-	-	0	0	0	0	0	0	0	-	0	0	-	0	0	0	0	0	-	0	0	0	0	1	-	0	0	0	-	-	0
D07518	3517215	TGCAGAAAAAAGCATGAGCAGAGAAGATGCAATTCAATGTTGCAATGAAGAGCAAATGCTTGTTTGTGG	TGCAGAAAAAAGCATGAGCAGAGAAGATGCAACTCAATGTTGCAATGAAGAGCAAATGCTTGTTTGTGG	chr6	1194878481	1	9.88e-28	Plus	32:T>C	0	0	0	0	0	0	0	0	0	-	-	0	0	0	0	0	0	0	1	0	0	-	0	0	0	0	0	-	0	0	0	0	1	-	0	0	0	-	-	0
D07531	39972050	TGCAGAAAAGAGTCCCCATGGTTTCCTAAGAATCTAGTGAGAGTAACAATTTGCAGACCTTGAAAGCAG	TGCAGAAAAGAGTCCCCATGGCTTCCTAAGAATCTAGTGAGAGTAACAATTTGCAGACCTTGAAAGCAG	chr2	1440121539	1	9.88e-28	Plus	21:T>C	0	0	0	-	0	0	0	0	0	0	-	-	0	-	0	-	0	0	0	0	-	0	0	-	0	0	0	-	0	0	0	0	0	-	0	-	0	-	0	0
D07537	22856489	TGCAGAAAATTATTCAAATTGAACAGATTAGGCAGAACCTTGATATTCTAACAATAAACTAATTTCAAG	TGCAGAAAATTATTCAATTTGAACAGATTAGGCAGAACCTTGATATTCTAACAATAAACTAATTTCAAG	chr1L	1630652056	1	9.88e-28	Minus	17:A>T	0	0	0	0	0	0	0	-	0	0	0	0	0	0	0	-	0	1	0	0	0	-	0	0	0	0	-	0	0	0	-	0	0	0	0	0	0	0	0	-
D07538	22856489	TGCAGAAAATTATTCAAATTGAACAGATTAGGCAGAACCTTGATATTCTAACAATAAACTAATTTCAAG	TGCAGAAAATTATTCAAATTGAACAGATTAGGCAGAACCTTGATATTCTAAAAATAAACTAATTTCAAG	chr1L	1630652022	1	9.88e-28	Minus	51:C>A	0	0	0	0	0	0	0	-	0	0	0	0	0	0	0	-	0	-	0	0	0	-	0	0	0	0	-	0	0	0	1	0	0	0	0	0	0	0	0	-
D07543	39971925	TGCAGAAACACGGTTTCGGAAACTTGCCTATAATTGTTGGGGAAATTGGGTGGCCAACCGATGGAGACA	TGCAGAAACACGGTTTCGGAAACTTGCCTATAATTGTTGGGGAAATTGGATGGCCAACCGATGGAGACA	chr2	1186528420	1	9.88e-28	Plus	49:G>A	0	0	0	0	0	0	-	0	0	0	-	0	0	0	0	0	0	0	0	0	0	0	-	0	0	0	0	0	0	0	0	0	0	0	0	0	0	0	0	-
D07555	3521824	TGCAGAAAGGTTTTTCTTTGTCATTTTTGGATATTTTCATAGTGTCAACCCTAATAGATTGAGCAAAAA	TGCAGAAAGGTTTTTCTTTGTCATTTTTGGATATTTTCATAGTGTCAACCCTGATAGATTGAGCAAAAA	chr5	3619836	1	9.88e-28	Plus	52:A>G	1	0	0	0	0	0	0	0	0	0	0	0	0	0	0	0	0	0	0	0	0	0	0	0	0	0	0	0	0	0	-	0	0	0	0	0	0	0	0	0
D07557	18318735	TGCAGAAATAATGCAGAAGAGGCATTGCAGAAGCTAAATGGTACAACAGTTGGCAAGCAAACTGTTCGC	TGCAGAAATAATGCAGAAGAGGCATTGCAGAAGCTAAATGGTACAACAGTTGGCAAGCAAACTGTTCGG	chr2	1024831302	1	9.88e-28	Minus	68:C>G	0	0	0	0	0	0	0	0	0	0	0	-	0	0	0	0	0	0	2	-	0	0	0	0	0	0	0	-	0	0	0	0	0	0	0	0	0	-	0	0
D07581	3520809	TGCAGAACGATCAATTGAATTCATGTTTGGATGGTTAGTAGCTCATAGCACACTTATATTACAGATCGG	TGCAGAACGATCAATTGAATTCATGTTTGGATGGTTAGTAGCTCATAGCAGACTTATATTACAGATCGG	chr1L	216550997	1	2.29e-23	Plus	50:C>G	0	0	-	0	0	0	0	0	-	-	-	-	0	-	0	0	0	0	0	0	0	0	0	-	0	0	-	-	0	0	0	0	0	0	0	-	0	0	0	0
D07583	13904292	TGCAGAACGCTTCAGCAGTATGAAAAAGGACATGCTCCCCATAACATTTTGTAATAGGGGAGCAATATG	TGCAGAACGCTTCAGCAGTATGAAAAAGGACATGATCCCCATAACATTTTGTAATAGGGGAGCAATATG	chr1S	213642686	1	9.88e-28	Plus	34:C>A	0	0	0	0	0	0	-	0	0	0	0	0	0	0	0	-	0	0	0	0	-	0	-	0	0	0	0	0	0	0	0	0	-	-	0	0	0	0	0	-
D07591	39978910	TGCAGAACTTCTTTGATCTAGAGAAGTATCCTCTACTTTCAGAACTCACTCACCGTTTCCAGGTAAATT	TGCAGAACTTCTTTGATCTAGAGAAGTATCCTCTACTTTCAGAACTCACTCACCGATTCCAGGTAAATT	chr2	463166180	1	9.88e-28	Plus	55:T>A	0	0	0	0	0	0	0	0	0	0	-	0	0	0	0	0	0	-	0	0	0	0	0	0	0	0	0	-	0	0	0	0	-	0	0	-	0	0	0	0
D07623	39963576	TGCAGAAGCATTTTCTGTTGACAAGTATCCATATCGGAGAAAGGAAGCGTCTTCGTCCACACAAATCAA	TGCAGAAGCATTTTCTGTTGACAAGTATCCATATCGAAGAAAGGAAGCGTCTTCGTCCACACAAATCAA	chr6	635031085	1	9.88e-28	Minus	36:G>A	0	0	-	0	0	0	0	0	0	-	0	0	0	-	0	0	0	0	0	0	0	0	0	0	0	0	-	-	0	0	-	0	0	0	0	-	0	-	-	-
D07626	3517157	TGCAGAAGGAATAGAGGCAGAAGTTGTCCGTGTGGAGAAACATTCTACAAGTTCACCTCAATCTCAAGA	TGCAGAAGGAGTAGAGGCAGAAGTTGTCCGTGTGGAGAAACATTCTACAAGTTCACCTCAAACTCAAGA	chr4	1402925469	1	9.88e-28	Minus	10:A>G	0	0	0	0	0	0	0	0	0	-	0	0	0	0	0	0	0	0	0	-	0	0	0	0	0	0	0	0	0	0	0	-	0	0	0	0	0	0	0	-
D07628	32610243	TGCAGAAGGCGTTCAACCGATTTCCTGGATGACACGAATCAGTATTGCGATCGGTGTTGCAAGAGGACT	TGCAGAAGGAGTTCAACCGATTTCCTGGATGACACGAATCAGTATTGCGATCGGTGTTGCAAGAGGACT	chr1L	450526408	1	9.88e-28	Plus	9:C>A	0	0	0	0	0	0	0	0	-	0	-	0	0	0	0	0	0	0	0	0	0	-	0	0	0	0	0	0	0	0	0	0	0	0	0	-	0	0	-	0
D07629	32610243	TGCAGAAGGCGTTCAACCGATTTCCTGGATGACACGAATCAGTATTGCGATCGGTGTTGCAAGAGGACT	TGCAGAAGGCGTTCAACCGATTTCCTGGATGACACGAATCAGTATTGCGATCGGTGTTGCTAGAGGACT	chr1L	450526459	1	9.88e-28	Plus	60:A>T	0	0	0	0	0	0	0	0	-	0	1	0	0	0	0	0	0	0	0	0	0	-	0	0	0	0	0	0	0	0	0	0	0	0	0	1	0	0	-	0
D07643	3514756	TGCAGAAGTTAGCACAAACTCGTTCTCAAGTTTTTCAATATCAATAGCAGATTGCCCCTTTTGAGTCTC	TGCAGAAGTTAGCACAAACTCGTTCACAAGTTTTTCAATATCAATAGCAGATTGCCCCTTTTGAGTCTC	chr3	254025197	1	9.88e-28	Plus	25:T>A	0	0	-	0	0	0	0	-	-	0	0	0	0	0	0	0	0	0	-	-	0	2	0	0	0	0	0	-	0	0	-	0	0	-	0	0	0	0	0	-
D07644	3514756	TGCAGAAGTTAGCACAAACTCGTTCTCAAGTTTTTCAATATCAATAGCAGATTGCCCCTTTTGAGTCTC	TGCAGAAGTTAGCACAAACTCGTTCTCAAGTTTTTCAATATCCATAGCAGATTGCCCCTTTTGAGTCTC	chr3	254025214	1	9.88e-28	Plus	42:A>C	0	0	-	0	0	0	0	-	-	0	0	0	0	0	0	0	0	0	-	-	0	0	0	0	0	0	0	-	0	0	-	0	0	-	0	0	0	0	0	-
D07650	39977013	TGCAGAATAAATTAGAAAAGTAAATTTAGAAGGCATAAAGAGGCCTCAAAGGGTTCTACTGACAACTTC	TGCAGAATACATTAGAAAAGTAAATTTAGAAGGCATAAAGAGGCCTCAAAGGGTTCTACTGACAACTTC	chr3	114363474	1	9.88e-28	Plus	9:A>C	0	0	0	0	0	0	0	0	0	-	0	0	0	0	0	0	0	0	0	0	0	0	0	0	0	-	0	0	0	0	0	0	0	0	0	0	0	0	0	-
D07655	18318758	TGCAGAATATAAGTCAAATTAGAACAAACAAGAAAAATATAATCTTTGACATCAAAGGATAAAGAAATT	TGCAGAATATACGTCAAATTAGAACAAACAAGACAAATATAATCTTTGACATCAAAGGATAAAGAAATT	contig_6764	222340	1	9.88e-28	Plus	11:A>C	0	-	0	0	-	0	0	0	0	0	0	0	0	-	0	0	0	0	0	0	-	-	0	0	0	0	0	0	-	0	0	0	0	-	0	0	0	0	0	-
D07661	13910542	TGCAGAATCACATCGTAGCAGCCTCCATACTTCACCATGCCAAAATCCAAGAGAAACAAGCAAGGTAAG	TGCAGAATCACATCTTAGCAGCCTCCATACTTCACCATGCCAAAATCCAAGAGAAACAAGCAAGGTAAG	chr1L	1779426542	1	9.88e-28	Plus	14:G>T	2	0	-	0	0	2	0	0	0	0	0	0	2	0	1	2	0	0	0	0	0	0	0	0	0	0	2	0	1	0	0	0	2	0	0	0	0	-	0	0
D07667	13904338	TGCAGAATCTAGAGAAGCCAAAGAAAATCTACTGGGCAATCAAGCTGAAAGGCAAAGTTATGAGAACCA	TGCAGAATCTAGAGGAGCCAAAGAAAATCTACTGGGCAATCAAGCTGAAAGGCAAAGTTACGAGAACCA	chr1L	948943716	1	9.88e-28	Minus	14:A>G	0	0	0	-	0	0	0	0	0	0	-	0	-	-	0	0	0	0	0	0	-	-	-	0	0	0	-	0	0	0	0	0	-	0	0	0	0	0	-	-
D07668	13904338	TGCAGAATCTAGAGAAGCCAAAGAAAATCTACTGGGCAATCAAGCTGAAAGGCAAAGTTATGAGAACCA	TGCAGAATCTAGAGAAGCCGAAGAAAATCTACTGGGCAATCAAGCTGAAAGGCAAAGTTACGAGAACCA	chr1L	948943711	1	9.88e-28	Minus	19:A>G	0	0	0	-	0	0	0	0	0	0	-	0	-	-	0	0	0	0	0	0	-	-	-	0	0	0	-	0	0	0	0	0	-	0	0	0	0	0	-	-
D07677	32610259	TGCAGAATGTGGACATTAGCAACATAAGTGAATGCAAAACAAACATGTACGATCACTGTTTCTGCATCA	TGCAGAATGTGGACATTAGCAACATAAGTGAGTGCAAAACAAACATGTACGATCACTGTTTCTTCATCA	chr3	254021933	1	9.88e-28	Plus	63:G>T	0	0	0	0	0	0	0	0	0	0	0	0	0	0	0	0	0	0	0	-	0	0	0	0	0	0	0	-	0	0	0	0	0	0	-	0	0	-	0	0
D07678	3522954	TGCAGAATTACTTGACATCCCACAAACATAACATTGTAACACTTCAACAACAACATCAATATCATACAA	TGCAGAACTACTTGACATCCCACAAACATAACATTGTAACACTTCAACAACAACATCAATATCATACAA	chr3	521340846	1	9.88e-28	Plus	7:T>C	0	2	0	0	0	0	0	0	0	0	0	-	-	1	0	0	0	0	0	0	0	0	-	0	0	0	0	0	0	0	0	-	-	-	0	2	0	0	0	0
D07695	22856571	TGCAGACAATGACAAACTTTGAGCCACTTCATAAGCTGCAAGCACACAATGGCTACATCCTGAAATGTC	TGCAGACAATGACAAACTTTGAGCCACTTCATAAGCTTCAAGCACACAATGGCTACATCCTGAAATGTC	chr1L	1668061073	1	9.88e-28	Plus	37:G>T	0	0	-	2	2	0	0	0	0	0	-	0	0	-	-	-	0	0	-	0	0	0	2	-	0	0	-	-	0	1	0	0	0	0	0	-	0	0	-	-
D07704	39977065	TGCAGACATCAAGACCGGAATACAATCAAATGTTTGTGAAGAAGCCTGGCGGTGGACCAGAACTTTGGC	TGCAGACATCAAGACCTGAATACAATCAAATGTTTGTGAAGAAGCCTGGCGGTGGACCAGAACTTTGGC	chr2	386671240	1	9.88e-28	Plus	16:G>T	0	0	0	0	0	0	0	0	0	0	-	0	0	-	0	0	0	0	-	-	0	0	0	0	0	0	0	0	0	0	0	-	0	0	-	0	0	0	0	-
D07771	18320268	TGCAGAGCAAGGAGGAATATGAAGCATCAGTGTGTTTATGTGGAAGCCAAGTTTGCCGTGGAAGCTATC	TGCAGAGCAAGGAGGAATATGAAGCATCAGTGTGTTTATGTGGAAGCCAAGTTTGCCGAGGAAGCTATC	chr6	94024770	1	9.88e-28	Minus	58:T>A	0	0	0	0	0	0	0	1	-	0	-	0	0	1	0	2	0	0	-	-	0	0	-	0	0	0	2	-	0	0	0	2	0	0	0	0	0	0	0	0
D07780	3520466	TGCAGAGGACAACTCATCCTCCCAAATGGTTTCGTCCACAACATTTTTCTTCCATTTTGTTGAAGTTAT	TGCAGAGGACAACTCATCCTCCCAAATGGTTTCGTACACAACATTTTTCTTCCATTTTGTTGAAGTTAT	chr1L	287749647	1	9.88e-28	Minus	35:C>A	0	2	-	0	0	0	2	-	0	0	0	0	0	0	-	0	0	0	-	2	0	0	-	0	0	-	2	0	0	0	0	0	-	0	0	0	0	2	0	0
D07821	3523244	TGCAGAGTTCCAACGCTGCATGGTTCTTCTTTTTAGACAGATTGCTCGCTGTCTCAATAGTCCGCATTT	TGCAGAGTTCCAACGCTGCATGGTTCTTCTTTTTAGACAGATTGCTCGTTGTCTCAATAGTCCGCATTT	chr5	986477277	1	9.88e-28	Plus	48:C>T	0	0	0	2	0	0	0	2	-	0	0	0	0	0	0	0	0	0	-	-	0	0	0	0	0	0	0	-	0	0	0	0	0	0	0	0	0	0	-	0
D07825	39972662	TGCAGAGTTTTCTGAATTCGTCGGTTTACTCTTGGATCAAAGATCTTATTATTGTTCAATAAGATGTCA	TGCAGAGTTTTCTGAATTCGTCGGTTTACTCTTGGATCAAAGATCTTATTATTGTTCAATAAGATATCA	chr1L	210177206	1	9.88e-28	Minus	65:G>A	0	0	0	0	0	0	0	0	0	-	0	0	0	0	-	0	0	0	0	0	0	0	0	0	-	0	-	-	0	0	-	-	0	0	0	0	0	0	0	0
D07846	32610306	TGCAGATAGGAACAGGATCAAAACAAACACATTCCTATGAGTGCAAGCACATTTTGTCCATGTTATCAT	TGCAGATAGGAACAGGATCAAAACAAACACATTCCTTTGAGTGCAAGCACATTTTGTCCATGTTATCAT	chr3	1242827589	1	9.88e-28	Minus	36:A>T	0	0	0	2	0	0	0	0	0	0	0	0	0	-	0	0	0	0	-	0	0	0	-	2	0	0	1	0	0	0	2	0	-	0	-	0	0	0	0	0
D07872	32609453	TGCAGATGAAAGTGCTAACCGTCTCTTCATTTCTGATTGCAATCATCACAGGATTATTGTATGTGATGG	TGCAGATGAAAGGGCTAACCGTCTCTTCATTTCTGATTGCAATCATCACAGGATTATTGTATGTGATGG	chr1L	1041009947	1	9.88e-28	Minus	12:T>G	0	-	0	0	0	0	0	0	0	0	0	0	0	-	0	-	0	0	0	0	0	0	1	0	0	0	-	-	0	0	0	-	-	0	0	0	0	0	0	-
D07873	32609453	TGCAGATGAAAGTGCTAACCGTCTCTTCATTTCTGATTGCAATCATCACAGGATTATTGTATGTGATGG	TGCAGATGAAAGTGCTAACCGTCTCTTCATTTCTGATTGCAATCATCACAGGATTATTGTATGTGAGGG	chr1L	1041009893	1	9.88e-28	Minus	66:T>G	0	-	0	0	0	0	0	0	0	0	0	0	0	-	0	-	0	0	0	0	0	0	-	0	0	0	-	-	0	0	0	1	-	0	0	0	0	0	2	-
D07882	3519722	TGCAGATGATTTAGACATCTTCTATCGGGCATATCATTTTTCATACAGCTTGTAGTTTGATTTCCTTCT	TGCAGATGATTTAGACATCTTCTATCGGACATATCATTTTTCATACAGCTTGTAGTTTGATTTCCTTCT	chr1S	1495689548	1	9.88e-28	Plus	28:G>A	-	0	2	2	2	0	-	0	0	-	0	-	0	0	0	0	0	0	0	0	0	-	0	0	0	0	0	0	0	0	0	0	0	-	0	0	0	0	0	0
D07895	3520954	TGCAGATGTTTTTATTGATATTACTAAGCAAGAATGGCATACTAATTTGAAAATCGACAATCTTTATGT	TGCAGATGTTTTTATTGATATTACTAAGCAAGAGTGGCATACTAATTTGAAAATCGACAATCTTTATGT	chr2	1180879499	1	9.88e-28	Minus	33:A>G	0	0	0	0	0	0	0	0	0	-	0	-	0	0	0	-	0	0	0	0	0	0	0	0	0	-	0	-	0	-	0	-	0	0	0	0	0	0	-	0
D07896	18318803	TGCAGATTACGTATTTCCTTCAATAAGCATTTAGGTGTGAAAATCAAATAAACTTTCCAACCTCCTTTG	TGCAGATTACGTATTCCCTTCAATAAGCATTTAGGTGTGAAAATCAAATAAACTTTCCAACCTCCTTTG	chr5	966483506	1	9.88e-28	Plus	15:T>C	0	0	-	0	0	0	0	0	0	2	0	0	0	0	0	-	0	0	-	0	0	0	-	-	-	-	0	-	0	0	0	0	-	0	0	0	0	2	0	0
D07900	22856641	TGCAGATTCAGAAAGATGTGAAGTTGATTCCAGTGAGAAATGTGTTACTTTTGTTGACCCACAACCTAT	TGCAGATTCAGAAAGATGTGAATCTGATTCCAGTGAGAAATGTGTTACTTTTGTTGACCCACAACCTAT	chr1S	789479184	1	9.88e-28	Plus	22:G>T	0	0	0	0	0	0	0	0	0	0	-	0	0	1	0	-	0	0	0	0	0	-	-	0	0	0	-	2	0	0	0	-	0	0	0	0	0	0	0	0
D07914	13912241	TGCAGATTGTAAAGTCCACATGTTTCAGAAGGCAGCCTTTCAATATTTGTGTGAGAAAGATTTACAGAT	TGCAGATTGTAAAGTCGACATGTTTCAGAAGGCAGCCTTTCAATATTTGTGTGAGAAAGATTTACAGAT	chr2	310321337	1	5.37e-25	Plus	16:C>G	0	0	0	0	0	0	0	0	0	0	0	0	0	0	2	0	0	0	-	0	0	0	0	0	0	0	0	0	0	2	0	0	0	0	0	0	0	0	0	-
D07915	13912241	TGCAGATTGTAAAGTCCACATGTTTCAGAAGGCAGCCTTTCAATATTTGTGTGAGAAAGATTTACAGAT	TGCAGATTGTAAAGTCCTCATGTTTCAGAAGGCAGCCTTTCAATATTTGTGTGAGAAAGATTTACAGAT	chr2	310321338	1	5.37e-25	Plus	17:A>T	0	0	0	0	2	0	0	0	0	0	0	0	0	0	0	0	0	0	-	0	0	0	0	0	0	0	0	0	0	0	0	0	0	0	0	0	0	0	0	-
D07916	22856646	TGCAGATTGTTTATTTGCCTATGAGTATGAGCATTACTCTAATAGTTCATTTGTTGTTTTTCTTTTGCA	TGCAGATTGTTTATTTGCCTATGAGTATGAGCATTACTCTAATAGTATATTTGTTGTTTTTCTTTTGCA	chr6	352102211	1	9.88e-28	Minus	46:T>A	0	0	1	0	2	0	0	0	0	0	0	0	0	-	0	0	0	0	0	0	0	0	0	0	0	0	0	0	0	0	1	0	0	0	0	-	0	2	0	0
D07922	13890644	TGCAGATTTCTTGTTTTTCATTGCATCAAAGTTGCTCAAAACAGTATCGCAGGTTTGACTCTCTCTTAG	TGCAGACTTCTTGTTTTTCATTGCATCAAAATTGCTCAAAACAGTATCGCAGGTTTGACTCTCTCTTAG	chr4	1066135226	1	9.88e-28	Plus	6:T>C	0	-	0	0	0	0	0	0	0	0	0	0	0	0	0	0	0	0	0	0	0	0	-	0	0	0	0	0	0	0	0	0	-	0	0	-	-	0	0	-
D07923	13890644	TGCAGATTTCTTGTTTTTCATTGCATCAAAGTTGCTCAAAACAGTATCGCAGGTTTGACTCTCTCTTAG	TGCAGATTTCTTGTTTTTCATTGCATCAAAATTGCTCAAAACAGTATCGCAGGTTTGACTCTCTCTTAG	chr4	1066135250	1	9.88e-28	Plus	30:G>A	0	-	0	0	0	0	0	0	0	0	0	0	0	0	0	0	0	0	0	0	0	0	-	0	0	0	2	0	0	0	0	0	-	0	0	-	-	0	0	-
D07935	39972911	TGCAGCAAACAAGCCAATTGATCTAGATGAAACCAACATCTCTACAATTCAAATTACAAGAACTGCATT	TGCAGCAAACAAGCCAATTGATCTAGATGAAACCAACATCTCTACAGTTCAAATTACAAGAACTGCATC	chr4	1601958078	1	9.88e-28	Plus	46:A>G	0	0	0	0	0	0	-	0	0	0	0	0	0	0	0	0	0	0	0	0	1	0	0	0	0	0	0	0	0	0	0	-	0	0	-	0	0	0	-	-
D07936	39972911	TGCAGCAAACAAGCCAATTGATCTAGATGAAACCAACATCTCTACAATTCAAATTACAAGAACTGCATT	TGCAGCAAACAAGCCAATTGATCTAGATGAAACCAACATCTCTACAATTCAAATTACAAGAACTGCATC	chr4	1601958100	1	9.88e-28	Plus	68:T>C	0	0	0	0	0	0	-	0	0	0	0	0	0	0	0	0	0	0	0	0	1	0	0	0	0	0	0	0	0	0	0	1	0	0	-	0	0	0	-	-
D07941	39964814	TGCAGCAAATATTTTTCTTGATTTGTTTGAAAAGCCTTTTGGCTGGGAAGCGGGAGTGTGGGTGGAACA	TGCAGCAAATATTTTTCTTGATTTGTTTGAAAAGCCTTTTGGATGGGAAGCGGGAGTGTGGGTGGAACA	chr6	219809815	1	9.88e-28	Minus	42:C>A	0	0	0	0	0	0	0	0	0	0	-	0	0	0	0	0	0	0	0	0	0	0	0	0	0	0	0	0	0	0	0	0	0	-	0	0	0	0	0	-
D07942	39964814	TGCAGCAAATATTTTTCTTGATTTGTTTGAAAAGCCTTTTGGCTGGGAAGCGGGAGTGTGGGTGGAACA	TGCAGCAAATATTTTTCTTGATTTGTTTGAAAAGCCTTTTGGCTGGGAAGCGGGAGTTTGGGTGGAACA	chr6	219809800	1	9.88e-28	Minus	57:G>T	0	0	0	0	0	0	0	0	0	0	-	0	0	0	0	0	0	0	0	0	0	0	0	0	0	0	0	0	0	0	0	0	0	-	0	0	0	0	0	-
D07950	18318820	TGCAGCAAGCTCAATAGGCGTTCTTCCCTCCTCATCCACAGCTCGAGGATCGCCTCCCCTGCATTGTAT	TGCAGCAAGCTCGATAGGCGTTCTTCCCTCCTCATCCACAGCTCGAGGATCGCCTCCCCTGCATTGTAT	chr1S	149340507	1	9.88e-28	Minus	12:A>G	0	0	0	0	0	0	0	0	0	0	0	0	0	0	0	-	2	0	0	-	0	2	0	0	0	-	0	-	0	0	0	0	0	0	0	-	-	0	0	0
D07954	39964894	TGCAGCAAGGTACCTCCCTAGACGAGGTTGAAATCTCATCTGCGTAGTACCACCCTGAGCAACAAGAAG	TGCAGCAAGGTACCTCCCTAGACGAGGTTGAAATCTCATCTGGGTAGTGCCACCCTGAGCAACAAGAAG	chr2	1177682501	1	9.88e-28	Minus	42:C>G	0	2	0	0	0	0	0	0	0	0	-	0	0	-	0	-	0	2	-	0	0	0	2	0	0	0	0	0	0	0	-	-	0	-	0	0	0	0	0	1
D07965	39979690	TGCAGCAATGGCTATTGTGAAGGTAGCATTATTTTGTTTTTCTACTCAAATATTTGATGAGAATCCAGG	TGCAGCAATGGCTATTGTGAAGGTAGCATTATTTTGTTTTTCTACTCAAATATTTGATGAGAATTCAGG	chr1S	1021309888	1	9.88e-28	Minus	64:C>T	0	0	0	0	0	0	-	0	0	0	0	0	0	0	0	-	0	0	0	0	0	0	-	-	0	0	0	0	0	0	0	0	0	0	0	-	0	0	0	-
D07978	3519334	TGCAGCACCCTCGGGAATGTGGTGACTCCAGTGTCTGCAAACGAAAAAGCAATTCTTATTACAGATCGG	TGCAGCACCCTTAGGAATGTGGTGACTCCAGTGTCTGCAAACGAAAAAGCAATTCTTATTACAGATCGG	chr2	1513486122	1	2.29e-23	Minus	11:C>T	0	0	0	-	0	0	0	0	0	0	-	0	0	0	0	-	0	0	0	0	-	0	-	-	0	0	0	-	0	0	-	0	-	-	0	0	0	0	0	0
D07979	3519334	TGCAGCACCCTCGGGAATGTGGTGACTCCAGTGTCTGCAAACGAAAAAGCAATTCTTATTACAGATCGG	TGCAGCACCCTCAGGAATGTGGTGACTCCAGTGTCTGCAAACGAAAAAGCAATTCTTATTACAGATCGG	chr2	1513486121	1	2.29e-23	Minus	12:G>A	0	0	0	-	0	0	2	0	0	0	-	2	2	0	0	-	0	0	0	0	-	2	-	-	0	0	0	-	0	2	-	0	-	-	0	0	0	0	0	0
D08049	13910669	TGCAGCATACCTTGGATATTACTCCCTCCGTTCCTAATTATAAGCACTCATTGAGGTAGGTCAAATAAT	TGCAGCATACCTTGGATATTACTCCCTCCGTTCCTAATTATAAGCACTCATTGAGGTAGGTCAAATAAG	chr5	796240445	1	9.88e-28	Minus	68:T>G	0	0	0	0	0	0	0	0	0	0	0	2	0	0	0	0	0	0	0	0	0	0	0	0	0	0	0	0	0	0	2	0	0	0	0	-	0	0	0	0
D08053	3522728	TGCAGCATATAGTGCTTGGGAAACCATCACTAGTGCTACCCCAGTTGGTTATGTCTTCTTTCACACTTC	TGCAGCATATAGTGCTTGGGAAACCATCACTACTGCTACCCCAGTTGGTTATGTCTTCTTTCACACTTC	chr5	1314483893	1	9.88e-28	Plus	32:G>C	0	0	-	0	0	0	0	0	-	0	-	0	0	-	-	0	0	0	0	0	0	0	0	-	0	0	0	0	0	0	0	-	0	1	0	0	0	0	0	0
D08057	39977422	TGCAGCATCAGCATGAACAAGTCAACGATATAGAACATATAAATAAGAAATCAGTTGGAAAAAATTGAA	TGCAGCATCAGCATGAACAAGTCAACGATAAAGAACATATAGATAAGAAATCAGTTGGAAAAAATTGAA	chr6	11022347	1	9.88e-28	Minus	30:T>A	0	0	-	0	0	0	0	0	0	0	0	0	0	0	0	0	0	0	0	0	0	0	0	0	0	0	0	-	0	0	0	0	-	0	0	0	0	0	0	1
D08061	3521021	TGCAGCATGATCAGAGCAGTAACTCAAGAGCAAGTGTAGAAGCTGGTGAAGAATCTGGAGGGGGCGGTA	TGCAGCATGATCAGAGCAGTAACTCAAGAGCAAGTGCAGAAGCTGGTGAAGAATCTGGAGGGGGCGGTA	chr1L	597664719	1	9.88e-28	Plus	36:T>C	0	0	0	0	0	0	0	0	0	-	0	-	0	-	0	0	0	0	1	0	0	0	-	0	0	-	0	-	0	2	0	0	-	0	-	-	0	0	0	0
D08068	39980961	TGCAGCATGTCCATTTTCCCCTGCTGTGAATTTCTTGCCCCGGATCAAAACTAAATATTATTACAGATC	TGCAGCATGTCCATTTTCCCCTGCTGTGAATTTCTTTCCCCGGATCAAAACTAAATATTATTACAGATC	chr1L	888483974	1	1.88e-24	Minus	36:G>T	0	0	-	0	0	0	-	0	0	2	-	0	0	-	0	0	0	0	0	0	0	0	0	-	0	-	0	0	-	0	-	0	0	0	0	0	-	0	0	0
D08093	13863355	TGCAGCTATTGCTAGCTAGTAAATACAATTTGCATTTTCAGATTATTTTGCTTTGTAAATGATATCTAC	TGCAGCCATTGCTAGCTAGTAAATACAATTTGCATTTTCAGATTATTTTGCTTTGTAAATGATATCTAC	chr2	1084819377	1	4.6e-26	Plus	6:T>C	0	0	2	0	2	2	0	0	0	-	0	0	0	0	0	-	0	0	0	0	0	2	0	-	0	0	0	-	0	0	2	0	0	-	0	0	0	0	0	0
D08107	3522460	TGCAGCCTCTTGACAATCTCGTACTTGTGCTCTGCATGCCACATGTCAAAGGTTTTTGTTAGCCAATTT	TGCAGCCTCTTGACAATTTCGTACTTGTGCTCTGCATGCCACATGTCAAAGGTTTTTGTTAGCCAATTT	chr1L	633237258	1	9.88e-28	Plus	17:C>T	0	0	0	0	0	0	0	0	0	0	-	0	0	0	0	2	0	0	0	0	0	0	0	0	0	0	0	-	2	2	0	0	0	0	-	0	0	2	0	-
D08121	32609531	TGCAGCGATTACATTATAATTGAGTATATGGTATGAGATATTGACAAGGAGGGCCAAAAACAAATGTTG	TGCAGCGATTACATTATAATTGAGTATATGGTATGAGATTTTGACAAGGAGGGCCAAAAACAAATGTTG	chr5	899172111	1	9.88e-28	Minus	39:A>T	0	2	0	0	0	0	0	0	0	0	0	0	0	0	0	0	0	0	-	0	0	0	0	-	0	1	0	0	0	2	0	0	0	-	0	0	0	0	0	0
D08122	32609531	TGCAGCGATTACATTATAATTGAGTATATGGTATGAGATATTGACAAGGAGGGCCAAAAACAAATGTTG	TGCAGCGATTACATTATAATTGAGTATATGGTATGAGATATTGACAGGGAGGGCCAAAAACAAATGTTG	chr5	899172104	1	9.88e-28	Minus	46:A>G	0	2	0	0	0	0	0	0	0	0	0	0	0	0	0	0	0	0	-	0	0	0	0	-	0	-	0	0	0	0	0	0	0	-	2	0	0	0	0	0
D08126	39977534	TGCAGCGGGATATGCTGGTGCATGCTTGTATTCAATGTCATTTCTTCGACTCTTCTACGGGTCCCACTC	TGCAGCGGGATATGCTGGTGCATGCTTGTATTCAATGTCATTTCTTAGACTCTTCTACGGGTCCCACTC	chr1L	706549477	1	9.88e-28	Minus	46:C>A	0	0	0	0	0	2	0	0	0	0	0	0	0	-	0	0	0	2	0	0	0	0	0	0	0	0	0	-	0	0	-	0	0	0	0	0	0	0	0	0
D08127	13904658	TGCAGCGGGTAGCTCTAAACACGCGAGTGAATAACAAGTGTTAGTTGCATTGCATGTAAGAGAGAGTGG	TGCAGCGGGTAGCTCTAAACACGCGAGTGAATAACAAGTGTTAGTTGCATTGCTTGTAAGAGAGAGTGG	chr5	863841321	1	4.6e-26	Minus	53:A>T	0	0	0	0	0	0	0	0	0	0	-	-	0	0	-	-	0	0	0	0	-	0	0	-	0	-	0	-	0	0	-	0	0	0	0	0	0	0	0	0
D08138	3532037	TGCAGCTACCATACTCCAAGATGGCGGAGGAAGTTCTCATTTGATACTCTCGTAGCATAATAAGAAGTT	TGCAGCTACCATACTCCAAGATGGCGGACGAAGTTCTCATTTGATACTCTCGTAGCATAATAAGAAGTT	chr5	1322519128	1	9.88e-28	Minus	28:G>C	-	0	0	0	0	0	0	0	-	0	0	0	0	-	0	0	0	-	-	-	0	0	0	0	0	0	0	0	0	-	0	0	-	0	-	0	0	0	0	0
D08158	3523970	TGCAGCTATTCTAGATGTTCCGGAGACAATGGGTTCGCATCCTATAGATGAAATATTGCTCTGGCATAA	TGCAGCTATTCTAGATGTTCCGGGGACAACGGGTTCGCATCCTATAGATGAAATATTGCTCTGGCATAA	chr1S	1141301317	1	9.88e-28	Minus	23:A>G	0	0	0	-	-	0	0	0	0	0	0	0	0	0	0	0	0	0	0	0	0	0	0	0	0	0	0	0	0	0	0	0	0	0	0	0	0	0	0	-
D08159	3523970	TGCAGCTATTCTAGATGTTCCGGAGACAATGGGTTCGCATCCTATAGATGAAATATTGCTCTGGCATAA	TGCAGCTATTCTAGATGTTCCGGAGACAACGGGTTCGCATCCTATAGATGAAATATTGCTCTGGCATAA	chr1S	1141301311	1	9.88e-28	Minus	29:T>C	0	0	0	1	1	0	0	0	0	0	0	2	0	0	0	2	0	0	2	0	0	0	0	0	0	0	0	0	0	0	2	0	0	0	2	0	0	0	0	-
D08160	3523970	TGCAGCTATTCTAGATGTTCCGGAGACAATGGGTTCGCATCCTATAGATGAAATATTGCTCTGGCATAA	TGCAGCTATTCTAGATGTTCCGGAGACAATGCGTTCGCATCCTATAGATGAAATATTGCTCTGGCATAA	chr1S	1141301309	1	9.88e-28	Minus	31:G>C	0	0	0	-	-	0	0	0	0	0	0	0	0	0	0	0	0	0	0	0	0	0	0	0	0	0	0	0	0	0	0	0	0	0	0	0	0	0	0	-
D08165	39973455	TGCAGCTCCTGAAGAAATCCCAACCTAAACAGAAATTGGAAAAAACATTATAAAACCTGAGGGCGTTCA	TGCAGCTCCTGAAGAAATCCCAACCTAAACAGAAATTGGAAAAAACATTATAAAACCTGAGGGCTTTTA	chr5	648873788	1	9.88e-28	Minus	67:C>T	0	0	0	-	0	0	0	2	0	0	0	0	0	0	0	0	0	0	0	-	-	-	0	0	0	0	0	-	0	0	0	0	0	-	0	0	0	0	0	0
D08179	3521449	TGCAGCTGCATGATTAGTTAGATACTCATATTCAAATTTCGAGATAGTGATCAATGAACTATGTTTCGC	TGCAGCTGCATGATTAGTTAGATACTCATATTCAAATTTTGAGATAGTGATCAATGAACTATGTTTCGC	chr5	505152765	1	9.88e-28	Minus	39:C>T	0	0	0	0	0	0	0	-	0	0	0	-	0	0	0	0	0	0	0	-	-	0	-	0	0	0	0	-	0	0	-	0	0	0	-	0	0	-	0	-
D08184	3523128	TGCAGCTGCTCCCAAAGTCATGTTTTTAGCAGCATTTCTACTCCTACTATCGTTCTGGTATGCCATACT	TGCAGCTGCTCCCAAAGTCATGTTTTTAGCAGCGTTTCTACTCCTACTATCGTTCTGGTATGCCGTACT	chr1L	496562937	1	9.88e-28	Plus	33:A>G	0	0	-	0	0	0	0	-	0	0	0	0	0	0	-	-	0	0	0	-	0	0	0	-	0	0	0	0	0	0	0	0	0	0	-	0	0	0	-	0
D08185	3523128	TGCAGCTGCTCCCAAAGTCATGTTTTTAGCAGCATTTCTACTCCTACTATCGTTCTGGTATGCCATACT	TGCAGCTGCTCCCAAAGTCATGTTTTTAGCAGCATTTCTACTCCTATTATCGTTCTGGTATGCCATACT	chr1L	496562950	1	9.88e-28	Plus	46:C>T	0	0	-	0	0	0	0	-	0	0	0	0	0	0	-	-	0	0	0	-	0	0	0	-	0	0	0	0	0	0	0	0	0	0	-	0	0	0	-	0
D08194	3524037	TGCAGCTGGGGTTCTTCCTTGTTGTCATGTTTTTCATGCTGAATGTTTGGAGCAGACAACGCCAAAGAC	TGCAGCGGGGGTTCTTCCTTGTTGTCATGTTTTTCATGCTGAATGTTTGGAGCAGACAACGCCAAAGAC	chr1L	824167705	1	9.88e-28	Minus	6:T>G	0	0	0	0	0	0	-	0	-	0	0	-	2	0	0	0	0	0	-	0	-	0	0	2	0	0	0	0	0	0	-	0	0	0	0	0	0	0	0	-
D08196	3524037	TGCAGCTGGGGTTCTTCCTTGTTGTCATGTTTTTCATGCTGAATGTTTGGAGCAGACAACGCCAAAGAC	TGCAGCTGGGGTTCTTCCTTGTTGTCATGTTTTTCATGCTGAATGTTTGGAGCAGACAACACCAAAGAC	chr1L	824167651	1	9.88e-28	Minus	60:G>A	0	0	0	0	0	0	-	0	-	0	0	1	0	0	0	0	0	0	-	0	-	0	0	0	0	0	0	0	0	0	1	0	0	0	0	0	0	0	0	-
D08202	22856754	TGCAGCTGTCCAATTTCTGGAGGAATGCTACCCGACAGATTGTTGAAGGACATATCACTAGAAAAAGAA	TGCAGCTGTCCAATTTCTGGAGGAATGTTACCCGACAGATTGTTGAAGGACATATCACTAGAAAAAGAA	chr3	990064327	1	9.88e-28	Minus	27:C>T	0	-	0	0	0	0	-	-	-	0	-	-	0	0	0	0	0	0	0	0	0	0	0	-	-	0	0	0	0	0	0	-	-	0	0	0	0	0	-	-
D08214	3520332	TGCAGCTGTTTGAGTCCTGCCATCTCCCATATTCTTTATCTAATGGTTCAAAATTAGTTTTACAGATCG	TGCAGCTGTTTGAGTCCTGCCATCTCCCATATTGTTTATCTAATGGTTCAAAATTAGTTTTACAGATCG	chr4	858314424	1	6.57e-24	Minus	33:C>G	0	0	0	-	0	0	0	0	0	0	0	0	1	-	0	0	0	0	0	0	0	0	0	-	0	1	0	0	0	-	0	0	0	0	0	0	0	0	0	-
D08216	3520332	TGCAGCTGTTTGAGTCCTGCCATCTCCCATATTCTTTATCTAATGGTTCAAAATTAGTTTTACAGATCG	TGCAGCTGTTTGAGTCCTGCCATCTCCCATATTCTTTATCTAATGGTTCAAATTTTGTTTTACAGATCG	chr4	858314405	1	6.57e-24	Minus	52:A>T	0	0	0	-	0	0	0	0	0	0	0	0	-	-	0	0	0	0	0	0	0	0	0	-	0	-	0	0	0	-	0	0	0	0	0	0	0	0	0	-
D08218	22856755	TGCAGCTTACAAACAAACCAAAACATGTAATAGAAAGAAACATTTCATGTCATCATGTGAATGAATATG	TGCAGCTTACAAACAAACCAAAACATGTAATAGAAAGAAACATTTCATGTCATCATGTGAATGAATATC	chr1S	299322241	1	9.88e-28	Minus	68:G>C	0	-	0	-	-	0	0	-	0	0	0	0	0	-	1	0	0	0	0	0	0	0	-	0	0	0	-	0	0	0	0	0	0	0	0	0	0	0	0	0
D08234	3520569	TGCAGCTTGTGCAAAAAAGTTTTGCTCGTTTGGTCTTTAGTGATTTCTTGAGGAATGCTAGGTACTCAT	TGCAGCTTGTGCAAAAAAGTTTTGCTCGTTTGGTCTTTAGTGATTTCTTGAGGGATGCTAGGTACTAAT	chr1L	1199453148	1	4.6e-26	Minus	53:A>G	0	0	0	0	0	0	0	0	0	0	0	0	0	-	1	-	0	0	0	0	0	0	0	0	0	0	-	0	-	0	0	0	0	0	0	0	0	0	0	0
D08266	39979161	TGCAGGAAGAAACTATCGCATTGGACCTAGGTCCATCTCTACCAAAAGATCAAAAGCACAGAGTGGGGG	TGCAGGAAGAAACTATCGCATTGGACCTAGATCCATCTCTACCAAAAGATCAAAAGCACAGAGTGGGGG	chr3	884024513	1	9.88e-28	Minus	30:G>A	0	0	0	0	0	0	0	0	-	0	0	0	0	0	0	0	0	0	0	-	0	-	0	0	0	0	0	0	0	0	0	0	-	0	0	0	0	0	0	0
D08275	39973695	TGCAGGAATTGGTCCCATAACTGTTTTCACTCCATCTTCCAACCATTCCAACTTCATACCCAGTTCACC	TGCAGGAATTGGTCCCATAACTGTTTTCACTCCATCTTCCAACCATTCCAACTTCATACCCAGTTCATC	chr5	30902567	1	9.88e-28	Minus	67:C>T	0	-	0	0	0	2	0	-	0	-	-	0	0	0	0	0	0	0	0	0	0	2	-	0	-	0	0	0	0	0	0	0	0	0	0	0	0	0	0	0
D08283	39977657	TGCAGGACCAGAGACTGGTGATGTGTTGACTGCTATGGAGAACAATCAACAGAAGTTATCCCGTAATAG	TGCAGGACAAGAGACTGGTGATGTGTTGACTGCTATGGAGAACAATCAACAGAAGTTATCCCGTAATAG	chr2	1012402082	1	9.88e-28	Minus	8:C>A	0	0	0	0	0	0	0	0	0	0	0	0	0	0	0	-	0	0	0	0	-	0	0	0	0	0	-	0	0	0	0	0	0	0	0	0	0	0	-	-
D08285	3519613	TGCAGGACGATAGCAAAGAAAAGTTCAAAATCATATATACATTGTTTTGTTCTTGAAACTTCTTCTATT	TGCAGGACCATAGCAAAGAAAAGTTCAAAATCATATATACATTGTTTTGTTCTTGAAACTTCTTCTATT	chr2	1688473581	1	9.88e-28	Minus	8:G>C	0	0	0	0	0	0	0	0	-	0	1	0	0	0	0	-	0	0	0	0	0	0	0	0	0	0	0	-	0	0	0	-	0	0	2	-	0	0	0	0
D08287	39973703	TGCAGGACTATATTGTACCCATCAAGACATCTCACCAGAATATGCAAGTATACTTCTGGTATGTATGCT	TGCAGGACTATATTGTACCCATCAAGACATTTCACCAGAATATGCAAGTATACTTCTGGTATGTATGCT	chr4	1254152371	1	9.88e-28	Plus	30:C>T	0	0	0	-	0	0	0	-	0	0	0	0	0	0	0	0	0	0	0	0	0	0	0	0	0	-	0	-	0	0	0	0	0	-	0	0	0	0	0	-
D08298	13865109	TGCAGGAGACGGTGATTACTTTTCTTTCAACTTTTTTTACCTCAAAATTATTCTACATCTCCTTATTGA	TGCAGGAGACGGTGATTACTTTTCTTTCAACTTTTTTTACTTCAAAATTATTCTACATCTCCTTATTGA	chr4	400416222	1	4.6e-26	Minus	40:C>T	0	-	0	0	0	0	0	0	0	0	0	-	0	0	0	0	0	0	0	0	0	-	0	0	0	0	0	0	0	0	0	0	-	0	0	0	0	0	0	0
D08304	39973723	TGCAGGAGCTGAATACTCTGCTTTACGGCGTTTCTGAACTCGCTCGGGTGGTTCAAATTCCTTCTTTTT	TGCAGGAGCTGAATACTCTGCTTTACGGCGTTTGTGAACTCGCTCGGGTGGTTCAAATTCCTTCTTTTT	chr1L	482414173	1	9.88e-28	Plus	33:C>G	0	0	0	0	0	0	0	0	0	-	0	0	0	0	0	0	0	0	0	0	-	0	0	0	0	-	0	-	0	0	0	0	-	0	0	0	0	0	0	0
D08305	39966198	TGCAGGAGCTGCATTCAAGAACAATAAAATAAAAGTGGTCTGAAGGGAGATATAATTACAAGAACAAAC	TGCAGGAGCTGCATTCAAGAACAATAAAATAAAAGTGGTCTGAAGAGAGATATAATTACAAGAACAAAC	chr2	973039306	1	9.88e-28	Minus	45:G>A	0	0	-	0	0	0	0	0	0	2	0	-	0	0	0	0	0	0	0	0	0	0	0	0	0	-	-	0	0	0	0	0	0	0	0	0	0	0	0	0
D08308	3520706	TGCAGGAGTCAGGTATCTTTGCAAGCTAAGAGCCCCAGCATTTGTAAATGCATCGCTACACCCCAAGAA	TGCAGGAGTCAAGTATCTTTGCAAGCTAAGAGCCCCAGCATTTGTAAATGCATCGCTACACCCCAAGAA	chr6	874866195	1	9.88e-28	Minus	11:G>A	0	0	0	-	0	0	0	0	0	0	-	0	0	0	0	0	0	0	-	0	2	0	0	0	0	0	0	0	1	0	0	0	-	0	0	-	0	0	-	0
D08311	3520706	TGCAGGAGTCAGGTATCTTTGCAAGCTAAGAGCCCCAGCATTTGTAAATGCATCGCTACACCCCAAGAA	TGCAGGAGTCAGGTATCTTTGCAAGCTAAGAGCCCCGGCATTTGTAAATGCATCGCTACACCCCAAGAA	chr6	874866170	1	9.88e-28	Minus	36:A>G	0	0	0	-	0	0	0	0	0	0	-	0	0	0	0	0	0	0	-	0	0	0	0	0	0	0	0	0	-	0	0	0	-	0	0	1	0	0	-	0
D08312	13910758	TGCAGGAGTTCGAAATACTGCAAGTGCAACTGTATCATTGACCCAGCGAATCACAGAATGACAATTTTT	TGCAGGAGTTCGAAATACTGCAAGTGCAACCGTATCATTGACCCAGCGAATCACAGAATGACAATTTTT	chr6	135993365	1	9.88e-28	Plus	30:T>C	0	2	0	0	0	0	0	0	0	-	0	0	0	0	0	-	0	0	0	2	0	0	0	0	0	0	0	2	0	0	0	0	0	0	0	0	0	0	0	0
D08340	3532355	TGCAGGCAAAGCACCTGACTTTCTTTTTGGTTGGAAAATTTAGGCATGCATCCAAGTGTGTCCAAAAAA	TGCAGGCAAAGCACCTGACTTTCTTTTTGTTTGGAAAATTTAGGCATGCATCCAAGTGTGTCCAAAAAA	chr3	1291669800	1	9.88e-28	Minus	29:G>T	0	0	0	0	2	0	2	0	0	0	0	1	0	0	0	0	0	0	0	0	0	0	0	0	0	0	0	0	0	0	2	0	0	0	0	0	0	0	0	0
D08367	39977728	TGCAGGCTTCTCGAATCCAACGCCAATACAGGCTCAAACATGGCCTATTGCACTACAGGGTAGAGACAT	TGCAGGCTTCTCGAATCCAACGCCAATACAGACTCAAACCTGGCCTATTGCACTACAGGGTAGAGACTT	chr1L	1502570729	1	9.88e-28	Plus	31:G>A	0	0	0	0	0	0	0	0	0	0	-	0	0	0	0	0	0	0	0	0	0	0	0	-	0	0	0	0	0	0	0	0	0	0	-	-	-	0	-	-
D08370	3520069	TGCAGGGAACACAGTTGCTACAGAGTCCCTCAATGTTGATGAGTCAACAATAGCCATCGGATGCTGGAA	TGCAGGGAACACAGTTGCTACAAAGTCCCTCAATGTTGATGAGTCAACAATAGCCATCGGATGCTGGAA	chr6	1156428139	1	9.88e-28	Minus	22:G>A	0	-	0	0	0	0	0	0	0	0	0	0	0	0	0	0	0	0	-	0	-	-	0	0	0	0	-	0	0	0	0	0	0	0	0	0	0	0	0	-
D08393	32610482	TGCAGGGTAAATCCACAATTTATGTATTTTCTATAGAACAATTGCATGGTCATTCAAAAAATGATTGCT	TGCAGGGTAAATCCACAATTTATGTATTTTCTATAGAACAATTGCATGGTCATTCAAAAAATGATTGCC	chr2	805188040	1	9.88e-28	Plus	68:T>C	0	0	0	2	-	0	1	1	0	0	0	0	2	1	-	0	0	0	0	0	1	0	0	0	0	-	0	0	0	0	0	0	-	0	0	0	0	0	0	0
D08394	39979202	TGCAGGGTACAATAGCACAATCCCTGATACAACCATAATTGAATGCATTCGAATGGTTGAAGAAAACCA	TGCAGGGTACAAAAGCACAATCCCTGATACAACCATAATTGAATGCATTCGAATGGTTGAAGAAAACCA	chr4	1002087970	1	9.88e-28	Plus	12:T>A	0	0	0	0	1	0	0	0	0	0	0	0	0	2	0	0	0	0	0	0	-	-	0	0	2	0	-	0	0	0	0	0	0	1	-	0	0	0	-	0
D08397	39976834	TGCAGGGTCAATTAGGATAGCATCATTTTGCTAGAAAAGATGACAATAAAGGAAATTGTTACAGATCGG	TGCAGGGTCAATTAGGATAGCATCATTTTGCTAGAAAAGATGACAATAAAGGAAATTATTACAGATCGG	contig_6250	190220	1	2.29e-23	Minus	57:G>A	0	0	0	0	1	0	0	0	0	0	0	2	0	0	-	0	0	0	0	0	0	0	0	0	0	0	0	0	0	0	0	2	0	0	0	0	0	0	0	-
D08403	13912663	TGCAGGGTTGCCGTCAAGATGCTTCTGGAGAGAGTGATTCTGGTGCAGGTGATGCTTTCGTTTTTTTAC	TGCAGGGTTGCCGTCAAGATGCTTCTGGAGAGAGCGATTCTGGTGCAGGTGATGCTTTCGTTTTTTTAC	chr4	1625802318	1	1.65e-25	Plus	34:T>C	0	2	0	0	0	0	0	0	0	0	0	-	0	1	0	0	0	2	-	0	0	0	0	0	0	0	0	0	0	2	2	0	-	2	0	1	0	0	0	0
D08413	32613613	TGCAGGTAAATTTGAGCAATGCTATCTTGGAAGGTGCACTTGTAACCGGAAATACATCTTTTACAGATC	TGCAGGTAAATTTGAGCAATGCTAACTTGGAAGGTGCACTTGTAACCGGAAATACATCTTTTACAGATC	chr2	430076992	1	8.74e-23	Minus	24:T>A	1	1	1	-	1	1	1	1	1	1	1	1	1	1	1	1	1	1	2	1	1	1	1	1	1	0	2	1	0	1	1	1	-	2	1	-	1	1	1	1
D08416	13865188	TGCAGGTACAAATGAGCTGGAAACTGCATTATCTGCCTACAAATCGATTTCTGCTCACGCTCCTGGCCA	TGCAGGTACAAATGAGCTGGAAACTGCATTATCTGCCTACAAATCGATTTCTGCTGACGCTCCTGGCCA	chr1S	195405312	1	4.6e-26	Plus	55:C>G	1	1	1	1	1	1	1	1	1	-	1	-	1	1	1	1	1	2	-	1	1	-	1	1	1	1	1	1	1	1	1	1	1	1	1	1	1	1	1	1
D08424	39974013	TGCAGGTATATAATTTATCCTTACATTTTCAGCTTCATTAGTAACGGTCTTCATTTCAAGTAGTACTTA	TGCAGGTATATAATTTATCCTTACATTTTCAGCTTCATTAGTAATGGTCTTCATTTCAAGTAGTACTTA	chr5	1223532286	1	9.88e-28	Plus	44:C>T	0	-	0	0	0	1	0	0	0	0	0	0	0	-	0	0	0	0	0	0	0	0	0	0	0	0	0	0	0	0	0	2	-	0	0	0	0	0	2	0
D08431	32610498	TGCAGGTCACGAATTTGATGTTTCGCGCCAACAAACACTTCTAAGGGCTGCCAGTTATGGGCAGGCCTT	TGCAGGTCACGAATTTGATGTTTCACGCCAACAAACACTTCTAAGGGCTGCCAGTTATGGGCAGGCCTT	chr2	204219579	1	9.88e-28	Minus	24:G>A	0	0	0	0	0	0	0	0	0	0	0	0	0	-	0	0	0	0	0	0	0	0	0	0	0	2	0	0	0	2	0	0	0	0	0	0	0	0	0	0
D08433	18318915	TGCAGGTCCTCTAGAGTCTTTGTCAGTGCCTTTGAGACATCTTCAGGTGCACAGTCACTAACCCTGCAC	TGCAGGTCTTCTAGAGTCTTTGTCAGTGCCTTTGAGACATCTTCAGGTGCACAGTCACTAACCCTGCAC	chr5	296759480	1	9.88e-28	Minus	8:C>T	0	-	0	0	0	0	0	0	-	0	0	0	0	0	2	-	0	0	-	0	0	0	0	0	0	0	0	0	0	0	0	0	0	0	0	-	0	0	0	0
D08436	3528823	TGCAGGTCTTTGAATGAGTTGCACTTGTATTCCAATCGACTTGATGGAAAGATTCCAAAAGAATTGGGA	TGCAGGTCTTTGAATGAGTTGCATTTGTATTCCAATCGACTTGATGGAAATATTCCAAAAGAATTGGGA	chr1S	212376617	1	9.88e-28	Minus	23:C>T	0	0	0	0	0	0	0	0	0	0	0	0	0	0	-	0	0	0	-	0	0	0	0	-	0	0	0	0	0	0	0	0	0	0	1	0	0	0	0	-
D08443	3509277	TGCAGGTGCATCTATAAAAAACCTCGCAGAACAGAAAGGCATCATTGTGAGATTTGTAATAGGAAGAAG	TGCAGGTGCATCTATAAAAAACCTTGCAGAACAGAAAGGCATCATTGTGAGATTTGTAATAGGAAGAAG	chr1L	1228170459	1	9.88e-28	Minus	24:C>T	0	0	0	0	0	0	-	0	-	0	0	0	2	-	-	0	0	0	0	0	0	1	0	-	0	1	0	-	0	0	0	0	0	-	-	0	0	0	0	0
D08446	3520583	TGCAGGTGGATCTCCGGGACAGGGCTGCACTAGAGCAAATTTTTGCTTCCACAAAGTAAGAGTTATGAC	TGCAGGTGGATCTCCGGGACAGGGCTGCACTAGAGCAAATTTTTGCTCCCACAAAGTAAGAGTTATGAC	chr1L	1221542100	1	9.88e-28	Minus	47:T>C	2	0	-	0	0	1	0	-	-	0	0	0	0	0	0	0	0	0	0	0	0	2	0	0	0	2	0	0	1	0	0	0	0	0	0	0	0	0	0	0
D08449	13909032	TGCAGGTGTATGTGGATGGGACAACTACAATGTCAACACATGAAAGAAAAGCAAGTATTAGGGAATTCT	TGCAGGCGTATGTGGATGGGACAACTACAATGTCGACACATGAAAGAAAAGCAAGTATTAGGGAATTCT	chr1L	1716258086	1	9.88e-28	Plus	6:T>C	0	-	0	0	0	0	0	0	0	-	-	0	0	0	0	0	0	-	0	0	0	-	0	0	0	0	0	1	0	0	0	-	-	0	0	0	0	0	-	0
D08471	3517789	TGCAGGTTGTATATTTTTATTTGCATTACTGCTTTTTGAATCATATCTATCAAACTGTTATCTTCTAGT	TGCAGGTTGTATATTTTTATTTGCGTTACTGCTTTTTGAATCATATCTATCAAGCTGTTATCTTCTAGT	chr5	394674760	1	9.88e-28	Minus	24:A>G	-	0	0	0	0	0	0	0	0	0	0	-	0	0	0	-	0	0	0	0	0	0	-	-	0	-	0	-	0	0	0	-	-	0	0	-	0	0	-	0
D08476	3523613	TGCAGGTTTATTACTTGTTTCATTTTTTTCTTTCTCATGAGGATTTATAAAATTGATTTGATTACTTCA	TGCAGGTTTATTACTTGTTTCATTTTTTTCTTTCTCATAAGGATTTATAAAATTGATTTGATTACTTCA	chr1L	1733031568	1	9.88e-28	Minus	38:G>A	0	-	0	0	0	0	-	0	0	0	0	0	0	0	0	0	0	0	0	0	0	0	0	0	0	0	-	0	0	0	-	2	0	0	2	-	0	0	0	0
D08482	3523357	TGCAGGTTTTACCAAAGCCCTGCACAATGGGCAGGTCCTTTCCCTCTCAAACCTGCCAAATAAGGTAAT	TGCAGGTTTTACCAAAGCCCTGCACAATGGGCAGGTCCTTTCCCTCTCAAACCTGCCAAATAAGGTGCT	chr5	382977730	1	9.88e-28	Minus	66:A>G	0	0	0	0	0	0	0	0	0	0	0	0	0	0	-	0	0	0	0	0	0	0	0	0	0	0	0	-	0	0	0	0	-	0	0	0	0	0	0	0
D08487	3516907	TGCAGTAAAAATCATTCCCTTGTCATAGAATGAATCATAATTTCCAATCTCAACCTGCCAATGCAATAT	TGCAGTAAAAATTATTCCCTTGTCATAGAATGAATCATAATTTCCAATCTCAACCTGCCAATGCAATAT	contig_6028	19219	1	4.6e-26	Plus	12:C>T	0	1	0	0	0	0	0	0	0	1	0	0	0	0	0	0	2	0	-	0	0	0	0	-	-	0	0	0	0	2	0	2	0	0	0	0	0	0	0	0
D08491	13904871	TGCAGTAAATACTTTTCATATACCGCAGTAGTATAGAGAATCTGGAAGCATATCAAGTGTGAGTTTCAC	TGCAGTAAATACTTTTCATATACCGCAGTTGTATAGAGAATCTGGAAGCATATCAAGTGTGAGTTTCAC	chr1S	868561326	1	9.88e-28	Minus	29:A>T	0	-	0	-	0	0	0	0	0	0	0	0	0	0	0	0	0	0	0	0	0	0	0	0	0	0	0	0	0	0	0	0	0	0	0	1	0	-	0	0
D08498	39966927	TGCAGTAACCAAAGCTTACAAGTTACAAGGATAAGATAAAAGATAAACTGAAAAATAGCTTTAGCCGTA	TGCAGTAACCAAAGCTTACAAGTTACAAGGATAAGATAAAAGATAAACTGAAAAATAGCTTTAGCCATA	chr4	1606742886	1	9.88e-28	Minus	66:G>A	0	0	0	0	0	0	0	0	0	0	0	0	0	0	0	0	0	0	1	0	0	0	0	0	0	0	-	0	0	0	0	0	0	0	0	0	0	0	0	0
D08503	39979237	TGCAGTAACTTGAGTGCCCATTCAACCTCATTCATTGACTCGTAGATACTTGACAGATTTGTAAGACCG	TGCAGTAACTTGAGTGCCTGTTCAACCTCATTCATTGACTCGTAGATACTTGACAGATTTGTAAGACCG	chr2	542279740	1	9.88e-28	Plus	18:C>T	0	0	0	0	0	0	0	0	0	0	0	0	0	0	0	0	0	0	0	0	0	0	0	0	0	0	0	0	0	0	0	0	0	-	0	0	0	0	0	-
D08505	3520355	TGCAGTAACTTTGAGTGAAGAGCCAACTGGAGATTGTATGTCCAACAACATTCGAGAACATGTTATGAC	TGCAGTAACTTCGAGTGAAGAGCCAACTGGAGATTGTATGTCCAACAACATTCGAGAACATGTTATGAC	chr2	1179689940	1	9.88e-28	Plus	11:T>C	0	0	1	0	2	0	0	0	-	0	1	0	2	0	0	0	0	0	-	0	0	0	-	0	0	0	0	-	0	0	0	0	0	0	0	1	0	0	0	0
D08542	3521195	TGCAGTAGGAAGCAAAACTTATTATTTGATGGTTTTTGAGCATAACAAAATAAAGAAGTTACAGATCGG	TGCAGTAGGAAGCAAAACTTATTCTTTGATGGTTTTTGAGCATAACAAAATAAAGAAGTTACAGATCGG	chr1L	1536828849	1	2.29e-23	Minus	23:A>C	0	2	0	0	0	0	0	0	0	0	-	0	0	0	-	0	0	1	0	0	-	0	0	1	0	0	0	-	0	0	0	0	0	0	0	0	0	0	0	-
D08543	3521195	TGCAGTAGGAAGCAAAACTTATTATTTGATGGTTTTTGAGCATAACAAAATAAAGAAGTTACAGATCGG	TGCAGTAGGAAGCAAAACTTATTCTTTGATGGGTTTTGAGCATAACAAAATAAAGAAGTTACAGATCGG	chr1L	1536828840	1	2.29e-23	Minus	32:T>G	0	0	0	0	0	0	0	0	0	0	-	0	0	0	-	0	0	-	0	0	-	0	0	-	0	0	0	-	0	0	0	0	0	0	0	0	0	0	0	-
D08562	39967141	TGCAGTATCGTTAGTTTGAGAGATTGGTGTCCCATATCCTCCAGCAGATGGACTTCGTGATGAATCCAT	TGCAGTATCGTTAGTTTGAGAGATTGGTGTCCCATATCCTCCAGCGGATGGACTTCGTGATGAATCCAT	chr6	1058262007	1	9.88e-28	Plus	45:A>G	0	0	0	0	0	0	0	0	-	0	0	0	0	0	0	-	0	0	2	0	0	0	0	0	0	0	0	0	0	0	0	0	1	0	0	0	0	0	0	0
D08577	3520931	TGCAGTCAACGCATTACATCTTGTTCATCCTGCATATGCATGGATTGATTCGTTGACTGACCGGAACTC	TGCAGTCAACGCATTACATCTTGTTCATCCTGCATATGCATGGATTGATTCGTTGACTGATCGGAACTC	chr3	254025727	1	9.88e-28	Minus	60:C>T	0	-	0	-	0	0	2	1	0	0	-	0	0	0	0	0	0	0	0	-	0	-	-	0	0	0	0	-	0	0	0	0	0	-	0	-	0	0	0	0
D08584	13909096	TGCAGTCACAATCCAATGTGATTGTAACCACAACCGATATTATATTATCGCAATTGCAATCAAAATGTT	TGCAGTCACAATCCAATGTGATTGTAACCACAACCGATATTATATTATCGCAATTGCAATCAAAATGTC	chr3	491237116	1	9.88e-28	Plus	68:T>C	2	0	0	0	0	0	0	-	0	-	-	0	0	0	0	2	0	0	0	-	1	0	0	0	0	0	0	-	-	0	0	0	0	0	0	0	0	0	-	-
D08589	32610535	TGCAGTCACGAAGAAACAGTCCATATGGTATAAATACAACACAGTCGAAGGAAGAAATAAGATAGAGCT	TGCAGTCACGAAGAAACAGTCCATATGGTATAAATACAACATAGTCGAAGGAAGAAATAAGATAGAGCT	chr2	374618101	1	9.88e-28	Plus	41:C>T	0	-	0	0	0	0	-	0	0	-	-	0	0	0	0	0	0	0	0	0	0	0	0	0	0	0	-	0	0	0	0	0	0	0	0	0	0	0	0	0
D08597	3513315	TGCAGTCATCCCAATATTGAGATTCCGATGACTCCAACACCCTCCTAATAATCCAGCAAGAGAGTGAAT	TGCAGTCATCCCAATATTGAGATTCCGGTGACTCCAACACCCTCCTAATAATCCAGCAAGAGAGTGAAT	contig_5927	213810	1	9.88e-28	Minus	27:A>G	0	-	0	0	0	0	0	-	-	0	-	0	2	0	0	0	0	0	0	0	0	0	0	0	0	-	0	0	0	0	-	0	0	0	0	-	0	0	0	-
D08598	39977907	TGCAGTCATCGTAGAAATTATCGAAGATGATGTGAGTAAAAATGTTTCAAAGCGTTTTTGTTTTTGGCT	TGCAGTCGTCGTAGAAATTATCGAAGATGATGTGAGCAAAAATGTTTCAAAGCGTTTTTGTTTTTGGCT	chr1S	163293893	1	9.88e-28	Minus	7:A>G	0	-	0	0	0	0	0	0	0	0	0	0	0	0	0	0	0	0	0	0	0	-	0	0	0	0	0	0	0	0	0	0	-	-	0	-	0	0	-	-
D08602	13904928	TGCAGTCATGCAATCAAAATGAGAGTATGTTGCAAAACAATTCCAACACTTGCTCCTTACTACATTGGT	TGCAGTCATGCAATCAAAATGAGAGTATGTTGCAAAACAATTCCAACACTTGCTCCTTTCTACATTGGT	chr6	324813766	1	4.6e-26	Plus	58:A>T	0	0	-	-	0	0	0	0	0	0	0	0	0	0	-	0	0	0	0	0	0	0	0	-	0	0	-	0	0	0	0	-	0	-	0	0	0	0	0	-
D08611	3523468	TGCAGTCGCACATGATTATCAAGTTCCAGGCCAAGCTATGTACACTCCGCAGCCTAGTGCAGCTCCTTC	TGCAGTTGCACATGATTATCAAGTTCCAGGCCAAGCTATGTACACTCCGCAGCCTAGTGCAGCTCCTTC	chr4	867668071	1	9.88e-28	Plus	6:C>T	-	0	-	0	0	0	-	0	-	-	1	0	0	0	-	0	0	0	-	0	-	0	1	0	0	-	0	0	0	0	0	-	0	-	0	-	0	0	0	0
D08612	3523468	TGCAGTCGCACATGATTATCAAGTTCCAGGCCAAGCTATGTACACTCCGCAGCCTAGTGCAGCTCCTTC	TGCAGTCGCACATGATTATCAAGTTCCAGGCCAAGCTATGTACACTCCACAGCCTAGTGCAGCTCCTTC	chr4	867668113	1	9.88e-28	Plus	48:G>A	-	0	-	0	0	0	-	0	-	-	-	0	2	0	-	0	0	0	-	0	-	0	-	0	0	1	0	0	0	0	0	-	0	-	0	-	0	0	0	0
D08662	3521071	TGCAGTGCAAACCACTAATTGGAAATTCCATTACAAACTGAGTAACAGCCACTGTCAATTATTCAACTA	TGCAGTGCAAACCACTAATTGGAAATTCCATTACAAACTGAGTAACAGCCACTGTCAATAATTCAACTA	chr3	492129682	1	9.88e-28	Plus	59:T>A	0	0	0	0	0	0	0	0	1	0	0	0	-	1	0	0	0	-	0	0	0	2	1	0	0	2	2	0	1	0	0	0	0	0	-	-	0	0	0	0
D08683	39979695	TGCAGTGCTTCTTTTAGCTGGGAAAGCAAAGTAGCCCTAGCAGCCTCCGCATTTTCAAGTTGCACCATA	TGCAGTGCTTCTTTTAGCTGGGAAAGCAAAGTAGCCCTAGCAGACTCCGCATTTTCAAGTTGCACCATA	chr1S	1243351851	1	9.88e-28	Minus	43:C>A	0	0	-	0	0	0	0	-	0	0	0	0	0	0	0	-	0	0	0	-	0	0	-	0	0	0	0	0	0	0	0	0	0	0	0	0	0	0	0	0
D08690	39977993	TGCAGTGGCCTTATCATCTCCATATATAATGGACAAGTTATCATAATTAGGAACAAGTTTTGTCATCCA	TGCAGTGGCCTTATCATCTTCATATATAATGGACAAGTTATCATAATTAGGAACAAGTTTTGTCATCCA	chr6	970023162	1	9.88e-28	Plus	19:C>T	0	-	0	0	0	0	0	0	-	0	0	0	0	-	0	0	0	0	0	0	0	0	0	0	0	-	1	0	0	2	0	0	-	0	0	0	0	0	0	-
D08691	39977993	TGCAGTGGCCTTATCATCTCCATATATAATGGACAAGTTATCATAATTAGGAACAAGTTTTGTCATCCA	TGCAGTGGCCTTATCATCTCCATATATATAGGACAAGTTATCATAATTAGGAACAAGTTTTGTCATCCA	chr6	970023171	1	9.88e-28	Plus	28:A>T	0	-	0	0	0	0	0	0	-	0	0	0	0	-	0	0	0	0	0	0	0	0	0	0	0	-	-	0	0	0	0	0	-	0	0	0	0	0	0	-
D08710	32610565	TGCAGTGTAAGTTTGTGAGTATTAGTATACAATCATAACAAAGTACCAAACTCATGACATGGTTGGAAA	TGCAGTGTAAGTTTGTGAGTATTAGTATACAATCATAACAAAGTACCAAACACATGACATGGTTGGAAA	chr3	488535879	1	9.88e-28	Minus	51:T>A	0	0	0	0	0	0	0	-	0	0	0	0	-	-	0	0	-	0	0	0	0	0	0	-	0	0	0	2	0	0	0	0	0	-	0	0	0	0	0	-
D08766	39980149	TGCAGTTGAAGATACACTACTGTCCAAGTAAAGTGGTAGCTTTGTTTTGACACAAAAACAAGCTTTTAT	TGCAGTTGAAGATACACTACTGTCCAAGTAAAGTGGTAGCTTTGTTTTGACACAAAAACAAGCTTTATT	chr6	0	1	4.6e-26	Plus	66:T>A	0	0	0	0	0	0	0	0	0	0	0	0	0	-	-	-	-	0	0	0	0	0	0	0	0	0	0	-	0	0	0	0	0	0	0	-	0	-	0	-
D08778	39980853	TGCAGTTGATTATGTTTTTCTGCATGTTATATTGTGATAACTTGTAGGCTTGTAAATGTTTACAGATCG	TGCAGTTGATTATGTTTTTCTGCATGTTATATTGTGATAACTTGGAGGCTTGTAAATGTTTACAGATCG	chr3	237547618	1	6.57e-24	Plus	44:T>G	0	0	0	0	0	0	0	0	-	0	-	0	0	0	0	0	0	0	-	-	0	0	0	0	0	0	-	-	0	0	0	0	-	-	0	0	0	0	0	0
D08787	39974723	TGCAGTTGCTCGCGGTAACGCTAGTCCCATTTTGTGTAACATTGTTGCAAATGGTCCATTACAGATCGG	TGCAGTTGCTCGCGGTAACGCTAGTCCCATTTTGTGTAACATTGTTGCAAATGGACCATTACAGATCGG	chr4	1503999502	1	2.29e-23	Plus	54:T>A	2	-	0	-	0	0	0	0	0	0	-	0	0	0	0	0	0	0	-	-	0	0	0	0	0	0	-	0	0	0	-	0	0	0	-	0	0	0	0	-
D08801	13866774	TGCAGTTGTGTCATTTCCAGCTCCAGCACCTTGAATAACCAGGGGTTGGTCACTATAGCATCGAGTGTA	TGCAGTTGTGTCATTTCCAGCTCCAGCACCTTGAATAACCAGGGGTTGGTCACTATAGCATTGAGTGTA	chr2	560500452	1	4.6e-26	Minus	61:C>T	0	0	0	0	0	2	1	0	2	0	-	0	0	0	0	0	0	0	-	0	0	-	2	-	0	-	0	0	0	0	-	0	0	-	0	-	0	0	0	-
D08806	32611241	TGCAGTTTCAGCTTACCATAAATTGGCCAAAGAGTGCAAAATCAAATAAGAAGGTAAAGGATAAGATAC	TGCAGTTTGAGCTTACCATAAATTGGCCAAAGAGTGCAAAATCAAATACGAAGGTAAAGGATAAGATAC	chr1L	1625260185	1	9.88e-28	Minus	8:C>G	0	0	-	0	0	0	-	0	1	0	0	0	0	0	-	-	0	0	0	0	0	0	0	0	0	-	0	0	0	0	0	0	-	0	0	-	0	0	0	0
D08819	39976870	TGCAGTTTGAATGTGTCAAATGAAAATAGTCCATCAGATTCTACTGATGACCACAATGATGAGGTAATG	TGCAGTTTGAATGTGTCAAATGAAAATAGTCCATCAGATTCTACTGATGACCACAATGATGAGGTAATC	chr4	1181764396	1	9.88e-28	Minus	68:G>C	0	0	0	0	0	0	0	0	0	0	0	0	0	0	-	-	0	0	-	0	0	0	0	0	0	0	0	0	0	0	0	0	0	0	0	0	0	-	0	0
D08878	39979721	TGCAGAAGCTAGCAAACAGTTCGCCCATAACATATCGAGGCAATATAGAGATTTTTGGCCCACTTTTCC	TGCAGAAGCTAGCAAACAGTTCGCCCATAACATATCGAGGCAATGTAGAGATTTTTGGCCCACTTTTCC	chr5	619923898	1	9.88e-28	Minus	44:A>G	0	1	0	0	0	0	0	0	0	0	0	2	0	0	0	-	0	0	0	0	0	0	0	0	0	0	0	-	0	0	0	0	0	0	-	0	0	0	0	0
D08889	13904324	TGCAGAAGTCACAGTGTTGTCACAACTAGTTTTCTGATGCTTATCTTGTGAGTTGTTGGTATCAGTAAG	TGCAGAAGTCACAGTGTTGTCACAACTAGTTTTCTGATGCTTATCTTGTGAGTTGTTGGTATCAATAAG	chr5	11763812	1	9.88e-28	Plus	64:G>A	0	0	0	0	0	0	1	0	0	0	-	0	0	0	-	-	2	0	0	0	0	-	2	0	0	0	1	0	1	0	0	-	0	0	0	-	0	0	0	0
D08890	39978922	TGCAGAATAAAGTTAGCAATGCCCAACTATACGTAGAATAAAATTAGAAATACCTAACTCAAGAATCTT	TGCAGAATAGAGTTAGCAATGCCCAACTATACGTAGAATAAAATTAGAAATACCTAACTCAAGAATCTT	chr1S	1300620396	1	9.88e-28	Minus	9:A>G	0	0	0	0	0	0	0	2	0	0	-	0	0	0	-	0	0	0	0	-	0	-	-	-	0	0	0	-	0	0	0	-	-	0	-	0	0	-	0	0
D08891	39978922	TGCAGAATAAAGTTAGCAATGCCCAACTATACGTAGAATAAAATTAGAAATACCTAACTCAAGAATCTT	TGCAGAATAAAGTTAGCAATGCCCAACTATACGTAGAATAAAATTAGAAATAACTAACTCAAGAATCTT	chr1S	1300620353	1	9.88e-28	Minus	52:C>A	0	0	0	0	0	0	0	0	0	0	-	0	0	0	-	0	0	0	0	-	0	-	-	-	0	0	0	-	0	0	0	-	-	0	-	0	0	-	0	0
D08893	13909230	TGCAGAATCAGATCTTCAAAAATCAAATAAAAGCTAGCAACTCAATTGTAAACCCTAAATGAGGTTGGT	TGCAGAATCAGATCTTCAAAAATCAAATAAAAGCTAGCAACTCAATTGTAAACCCTAAATGAGGTTGGA	chr1S	803483488	1	4.6e-26	Plus	68:T>A	0	0	0	0	0	0	0	0	0	0	-	0	0	0	0	-	0	0	0	-	-	0	0	0	-	0	0	2	0	0	0	0	0	-	0	0	0	0	0	-
D08949	22857338	TGCAGATGAACCTCAACCGCCAAGGAAACGGCCTAGAATAGTTCCAGGTGAAGATATTGATGAGAAATC	TGCAGAGGAACCTCAACCGCCAAGTAAACGGCCTAGAATAGTTCCAGGTGAAGATATTGATGAGAAATC	chr4	883755839	1	4.6e-26	Minus	6:T>G	0	0	1	-	0	0	0	0	-	0	0	-	0	0	0	0	0	0	0	-	0	0	0	0	0	-	0	0	0	0	2	0	0	-	0	0	0	0	0	0
D08950	22857338	TGCAGATGAACCTCAACCGCCAAGGAAACGGCCTAGAATAGTTCCAGGTGAAGATATTGATGAGAAATC	TGCAGATGAACCTAAACCGCCAAGGAAACGGCCTAGAATAGTTCCAGGTGAAGATATTGATGAGAAATC	chr4	883755832	1	4.6e-26	Minus	13:C>A	0	0	-	-	0	2	0	0	-	0	0	-	0	0	0	0	0	0	0	-	0	0	0	0	0	-	0	0	0	0	0	0	0	-	0	0	0	0	0	0
D08952	13864839	TGCAGATGAGAAGCTTATAACTTAGTCATATATCATGCATAAATCTTGAATTCTAATGATAATGGACAT	TGCAGATGAGAAGCTTATAACTTAGTCATATATCATACATAAATCTTGAATTCTAATGATAATGGACAT	chr5	1106041368	1	9.88e-28	Plus	36:G>A	0	0	1	1	0	0	0	-	0	0	0	0	0	-	0	-	0	0	0	0	0	0	0	0	0	2	0	0	0	2	-	0	0	-	0	0	0	-	0	0
D08955	39977255	TGCAGATGTGCGGATTGTGAGTATACTTTACATAATTCACAACTCTTTTTCAATTGATAAAAAACACTT	TGCAGATGTGTGGATTGTGAGTATACTTTACATAATTCACAACTCTTTTTCAATTGATAAAAAACACTT	chr5	471589885	1	9.88e-28	Minus	10:C>T	0	-	0	0	0	-	0	0	0	0	0	0	0	0	0	0	-	0	0	0	0	-	0	0	0	-	0	0	0	0	0	0	0	0	-	-	0	-	0	0
D08956	3519262	TGCAGATGTGTCCTTCGTCACTGAATAGACGCACACAAAGCCCTGCATAATGCATGTGTATTTCGTAAG	TGCAGATGTGTCCTTCGTCACTGAATAGACGCACACAAAGCCCTGCATAATACATGTGTATTTTGTAAG	chr2	1101927985	1	9.88e-28	Plus	51:G>A	0	0	0	0	0	0	1	0	0	0	0	0	2	0	0	1	0	0	0	0	0	0	0	0	0	0	0	-	0	2	0	0	0	0	2	0	0	0	0	0
D09006	39977418	TGCAGCATATATAACATTGGTGTAAAATCACATCCGTCAAAACATAATTGGGAAAATGACTATACAAAA	TGCAGCATATATAACATTAGTGTAAAATCAGATCCGTCAAAACATAATTGGGAAAATGACTATACAAAA	chr2	1337647236	1	9.88e-28	Minus	18:G>A	0	0	-	0	0	0	0	0	0	0	0	0	0	0	0	-	0	0	0	-	0	0	0	-	0	1	0	0	0	0	-	0	0	-	0	-	0	0	-	0
D09079	39977717	TGCAGGCCTTTTTCTTCCTGCTGTTGTGAGGCCTATTCTGGACTCATATCAAACAACCGAGCAACCTCC	TGCAGGCCTTTTTCTTCCTGCTGTTGTGAGGCCTATTCTGGACTCATATCAAACGACCGAGCAACCTCC	chr5	1336042024	1	9.88e-28	Minus	54:A>G	0	0	0	-	0	0	0	0	0	0	-	-	1	0	0	-	0	0	0	0	-	0	0	0	-	0	0	-	0	0	0	0	0	0	-	0	0	-	0	0
D09083	39973885	TGCAGGGAACGTAAGCGACGATAACGAAAGAAGTTCTGTTGTGGTTTCTGGTTTAGATTCGAAAGAAGC	TGCAGGGAACATAAGCGACGATAACGAAAGAAGTTCTGTTGTGGTTTCTGGTTTAGATTCCAAAGAAGC	chr1L	924851762	1	9.88e-28	Minus	10:G>A	0	-	-	-	0	0	0	0	1	0	-	0	0	-	0	-	0	0	0	0	0	0	0	0	0	0	0	0	0	0	0	0	0	-	0	0	0	2	0	0
D09099	32609630	TGCAGGTTAGAGTATATATATTCACTGTCTTTCCATAACCAGCTGGATCCTCACACATTATCTTGTCTT	TGCAGGTTAGAGTATATATATTCACTGTCTTTCCATTACCAGCTGGATCCTCACACATTATCTTGTCTT	chr4	1348263422	1	9.88e-28	Plus	36:A>T	0	0	-	0	0	0	0	0	0	0	-	0	0	0	0	0	0	-	0	0	0	0	0	0	0	0	0	-	0	0	0	0	0	0	0	-	0	0	0	0
D09122	18318945	TGCAGTCCACGAATAATCACTAAAACTATAAGTGACACATAATAATTTCAAAAAACTGATGTCGGGTTT	TGCAGTCCACGAATAATCACTAAAACTATAAGTGACACATAATAATTTCAAAAAACTGATGTCGGGTAT	chr1L	1173344351	1	9.88e-28	Plus	67:T>A	0	0	0	0	0	0	0	0	0	0	-	0	0	-	0	0	0	-	0	0	-	0	0	0	0	0	1	0	0	0	0	0	-	0	0	-	2	-	0	-
D09192	13904435	TGCAGAGGGAGCTGAAAATGGAGGTGAGAGTAATGAGAACAAAGGAGATAATTCTACTGTGAATGATGG	TGCAGAGGGGGCTGAAAATGGAGGTGAGAGTAATGAGAACAAAGGAGATAATTCTACTGTGAATGATGG	chr4	1392875686	1	9.88e-28	Plus	9:A>G	0	0	0	0	0	0	0	0	-	0	-	0	0	0	0	-	0	0	0	-	0	0	0	0	-	0	0	0	2	0	-	0	-	0	2	0	2	0	0	0
D09262	13905004	TGCAGTTAGAGAACTCCCTCGTTTCAAGCATCTATCTATTCTTGGCCATGAAGAATCACCTATAAACCT	TGCAGTTAGAGAACTCCCTGGTTTCAAGCATCTATCTATTCTTGGCCATGAAGAATCACCTATAAACCT	chr5	1021400330	1	9.88e-28	Minus	19:C>G	0	0	0	0	0	0	-	0	0	0	-	0	0	-	0	0	0	0	0	-	0	0	0	0	0	0	0	0	0	0	1	0	0	-	0	0	0	0	0	0
D09427	3521563	TGCAGAAAAGCATTGAAAATCTCCGATAGATAAGTTTCAAACTAAATTAGGATTTTACAGATCGGAAGA	TGCAGAAAAGCATTGAAAATCTCCAGTAGATAAGTTTCAAACTAAATTAAGATTTTACAGATCGGAAGA	chr2	1153880004	1	3.39e-21	Plus	49:G>A	0	0	0	0	0	0	0	0	0	-	0	0	0	-	0	0	0	0	0	0	0	0	0	0	-	-	0	0	0	0	0	0	-	0	0	0	0	-	0	-
D09440	3519161	TGCAGAAAGTGGTAGTGCCGACAGTAACAAATTAGAAGAAAAACTTCATTACAGATCGGAAGAGCGGTT	TGCAGAAAGTTGTAGTGCCGACAGTAACAAATTAGAAGAAAACCTTCATTACAGATCGGAAGAGCGGTT	chr2	430077023	1	5.87e-18	Plus	10:G>T	0	0	0	0	0	0	0	-	0	0	-	0	0	0	2	0	0	0	0	0	0	0	0	0	0	-	-	0	0	0	0	0	0	0	0	0	0	0	0	0
D09446	39979401	TGCAGAAATATTACAAATACCATTATGTACTATCAACGGTTTTATCTAAAAAGTTACAGATCGGAAGAG	TGCAGAAATATTACAAATACCATTATGTACTACCAACGGTTTTATCTAAAAAGTTACAGATCGGAAGAG	chr1S	712242889	1	1.18e-20	Plus	32:T>C	0	-	0	-	0	0	0	0	-	0	0	0	2	0	0	0	0	0	0	2	0	0	0	0	0	0	0	-	0	0	0	0	0	0	0	0	0	0	0	0
D09456	13865783	TGCAGAACCTGAGATGGAAGAGAGAAAACTGGTTTGTTTCCTTTATTATCATTCTTTACAGATCGGAAG	TGCAGAACCTGAGATGGAAGAGAGAAAACTGGTTTGTTTCCTTTGTTATCATTCTTTACAGATCGGAAG	chr1S	826767080	1	9.73e-22	Plus	44:A>G	0	0	0	-	0	0	0	0	0	0	0	0	0	0	0	-	0	0	0	0	0	0	0	-	0	0	0	0	0	0	0	-	-	0	0	-	0	0	0	0
D09485	3520485	TGCAGAATTGGATGATAATACTTCAATAAACACGGAAAGTATTACAGATCGGAAGAGCGGTTCAGCAGG	TGCAGAGTTGGATGATAATACTTCAAGAAACACGGAAAGTATTACAGATCGGAAGAGCGGTTCAGCAGG	chr2	1400044370	1	3.42e-14	Minus	6:A>G	0	2	0	0	0	0	0	0	0	0	0	0	0	0	0	0	0	-	0	0	0	0	0	0	2	0	0	0	0	0	0	0	-	0	0	0	0	0	0	-
D09487	3523240	TGCAGACAAATCTTACGAAATTTTGCAGACAAATTCTATTACAGATCGGAAGAGCGGTTCAGCAGGAAT	TGCAGACGAATCTTACGAAATTTTGCAGACAAAGTCTATTACAGATCGGAAGAGCGGTTCAGCAGGAAT	chr2	167386284	1	1.33e-12	Plus	7:A>G	0	0	0	0	0	0	0	0	-	0	0	-	0	0	0	0	0	0	-	0	0	0	0	0	0	0	0	0	0	0	-	0	0	0	-	0	0	0	0	0
D09488	3523240	TGCAGACAAATCTTACGAAATTTTGCAGACAAATTCTATTACAGATCGGAAGAGCGGTTCAGCAGGAAT	TGCAGACAAATCTTACGAAATTTTGCAGACAAAGTCTATTACAGATCGGAAGAGCGGTTCAGCAGGAAT	chr2	167386310	1	1.33e-12	Plus	33:T>G	0	0	0	0	2	0	0	0	1	0	2	1	0	0	0	0	0	0	-	0	0	0	0	0	0	0	0	0	0	0	1	0	0	0	1	0	0	0	0	0
D09532	39979449	TGCAGAGTCAACAAATAAAAATCAATATATGCAGACCCTATGACTAACACAAGTTATTACAGATCGGAA	TGCAGAGTCAACAAATAAATATCAATATATGCAGACCCTATGACTAACACAAGTTATTACAGATCGGAA	chr4	1118845280	1	2.79e-22	Minus	19:A>T	0	-	-	0	0	0	0	0	0	0	0	0	0	0	0	-	0	0	-	-	0	0	0	0	0	0	0	0	0	0	0	0	0	0	0	0	0	0	0	-
D09546	32611886	TGCAGATAATCCATAAAACGAAGTGGAACGTTATGTAAATCTTTACAGATCGGAAGAGCGGTTCAGCAG	TGCAGATAATCCATAAAACGAAGTGAAACGTTATGTAAATCTTTACAGATCGGAAGAGCGGTTCAGCAG	chr4	456239275	1	1.01e-14	Plus	25:G>A	0	0	0	2	0	2	0	0	0	0	0	0	0	0	0	0	0	0	0	0	0	0	0	0	1	0	0	-	0	0	2	0	0	0	0	0	0	0	0	0
D09547	32611886	TGCAGATAATCCATAAAACGAAGTGGAACGTTATGTAAATCTTTACAGATCGGAAGAGCGGTTCAGCAG	TGCAGATAATCCATAAAACGAAGTGGAACGTTACGTAAATCTTTACAGATCGGAAGAGCGGTTCAGCAG	chr4	456239283	1	1.01e-14	Plus	33:T>C	0	0	2	0	0	0	0	0	0	0	0	0	0	0	0	0	0	0	0	0	0	0	0	0	-	0	0	-	0	2	0	0	0	0	0	0	0	0	0	0
D09550	32610008	TGCAGATAGGAAAAAGAATTGCAATTATAACATCCAGGAAATTCTTACAGATCGGAAGAGCGGTTCAGC	TGCAGATAGGAAAAAGAATTGCAATTATAACCTCCAGGAAATTCTTACAGATCGGAAGAGCGGTTCAGC	chr6	1446874532	1	8.59e-16	Minus	31:A>C	0	0	1	0	2	0	0	0	0	0	0	2	0	-	0	-	0	0	0	1	0	-	-	0	0	0	0	0	0	0	2	0	0	-	0	0	0	-	0	-
D09552	3507378	TGCAGATATGAGTTGTAGATGTAAGCTGTTGATAGCAAAACAGTTTTACAGATCGGAAGAGCGGTTCAG	TGCAGATATGAGTTGCAGATGTAAGCTGTTGATAGCAAAACAGTTTTACAGATCGGAAGAGCGGTTCAG	chr1L	1212200287	1	2.5e-16	Plus	15:T>C	0	2	0	0	-	2	-	0	0	0	0	-	2	1	0	-	0	1	1	0	0	0	2	0	0	-	0	0	1	0	0	2	0	0	0	0	2	0	0	-
D09561	3516191	TGCAGATCAGCAATTCAATAAAGTATTGGCGAAAGACAAAAGAACATTTTACAGATCGGAAGAGCGGTT	TGCAGATCAGCAATTCAATAAAGTATTGGCGAAATACAAAAGAACATTTTACAGATCGGAAGAGCGGTT	chr2	1133851393	1	5.87e-18	Plus	34:G>T	0	0	0	-	0	0	2	0	0	0	2	0	0	0	0	0	0	0	0	-	0	0	-	-	0	2	-	0	1	0	0	0	0	0	-	0	1	-	-	0
D09590	39968838	TGCAGATTCTCCCACCATCACAACCACGCCTTCAAATCAAGAATGCTTTTACAGATCGGAAGAGCGGTT	TGCAGATTCTCCCACCATCACACCCACGCCTTCAAATCAAGAATGCTTTTACAGATCGGAAGAGCGGTT	chr5	293284594	1	5.87e-18	Minus	22:A>C	0	-	0	0	0	0	0	0	0	0	0	0	0	0	0	0	0	0	0	0	0	0	0	0	0	0	0	0	0	0	0	0	0	0	0	-	0	0	0	0
D09597	32609057	TGCAGATTTCACTATGGGTGACTGCAAATGAATGAAAGTTCTTTACAGATCGGAAGAGCGGTTCAGCAG	TGCAGATTTCACTATGGGTGACTGCATATGAATGAAAGTTCTTTACAGATCGGAAGAGCGGTTCAGCAG	chr1L	1315934082	1	1.01e-14	Minus	26:A>T	0	0	0	0	0	0	0	2	0	0	-	0	0	0	-	0	0	0	-	0	-	2	0	0	0	0	0	-	0	0	-	0	0	0	0	0	0	0	0	0
D09599	3512717	TGCAGATTTTAGTTCCTGCGGATTTATAATTACTCACGAAGGTTTTACAGATCGGAAGAGCGGTTCAGC	TGCAGATTTTAGTTCCCGCGGATTTATAATTACTCACAAAGGTTTTACAGATCGGAAGAGCGGTTCAGC	chr6	486156518	1	4e-14	Plus	16:T>C	0	0	0	-	0	0	0	2	-	-	0	0	0	0	-	0	0	0	0	-	0	0	2	-	0	0	0	0	0	0	0	2	2	0	0	-	0	0	0	-
D09611	32609066	TGCAGCAACTCGCAAAACATGATAAAGGTGGCAATCGGTAAGAGTTTTACAGATCGGAAGAGCGGTTCA	TGCAGCAACTTGCAAAACATGATAAAGGTGGCAATCGGTAAGAGTTTTACAGATCGGAAGAGCGGTTCA	chr2	520001569	1	7.27e-17	Plus	10:C>T	2	2	-	0	0	0	0	0	-	0	0	0	2	0	0	0	2	2	0	0	0	0	0	0	0	0	0	0	0	0	-	0	0	-	-	0	0	0	0	2
D09616	32610025	TGCAGCAAGTACAATTGAACTTCTTACCAATCCAAAATGAAAGCAAACAAGTTATTTACAGATCGGAAG	TGCAGCAAGTACACATGAACTTCTTACCAATCCAAAATGAAAGCAAACAAGTTATTTACAGATCGGAAG	chr1L	1418866867	1	9.73e-22	Minus	14:T>A	0	0	0	0	0	0	0	0	0	0	0	0	0	0	0	0	0	0	-	0	0	0	0	-	0	0	0	0	0	0	0	0	0	0	0	-	0	0	0	-
D09653	13912432	TGCAGCCATAAGATCAGCTTTGGTAACAACAGGTAAGTCAATTACAGATCGGAAGAGCGGTTCAGCAGG	TGCAGCCATAAGATCAGCTTTGGTAACAACAGGTATGTCAATTACAGATCGGAAGAGCGGTTCAGCAGG	chr6	1044979451	1	3.42e-14	Plus	35:A>T	0	0	0	0	0	0	0	0	0	0	-	0	0	-	0	0	0	0	0	0	0	0	-	0	0	0	0	-	0	0	-	0	0	0	0	0	1	2	0	0
D09655	3510509	TGCAGCCATGCATCCAGAAGCGTCTGTGCTGGCTCCTTCCCTTCTGGATATGTTACAGATCGGAAGAGC	TGCAGCCATGCATCCAGAAGCGTCTGTGCTGGCTCCTTCCTTTCTGGATATGTTACAGATCGGAAGAGC	chr2	513767884	1	4.09e-20	Minus	40:C>T	0	-	0	0	0	0	0	0	0	0	0	0	0	-	-	2	0	0	0	0	0	0	0	-	0	0	0	0	0	0	0	0	-	0	-	0	0	0	0	-
D09683	32611899	TGCAGCGTTTTGTTTACTTTACATTGGCTGTTATAGTGTTATGTTTTACAGATCGGAAGAGCGGTTCAG	TGCAGCGTTTTGTTTACTTTACATTGGCTGTTATACTGTTATGTTTTACAGATCGGAAGAGCGGTTCAG	chr2	1577297843	1	2.5e-16	Plus	35:G>C	0	0	0	-	0	0	0	0	-	0	0	-	0	0	0	0	0	1	0	0	0	0	0	-	0	0	0	-	0	0	-	0	0	0	0	0	0	0	0	0
D09691	3517281	TGCAGCTACTTTTCCAATCAACCTGTTCCATAAAATCTAACTAATTACAGATCGGAAGAGCGGTTCAGC	TGCAGCTACTTTTCCGATCAATCTGTTCCATAAAATCTAACTAATTACAGATCGGAAGAGCGGTTCAGC	chr1L	733390706	1	8.59e-16	Plus	15:A>G	0	-	0	0	0	0	-	-	0	-	-	0	0	0	-	-	0	0	0	-	-	-	-	-	0	0	0	0	0	0	0	0	0	-	0	-	0	0	-	0
D09705	3523120	TGCAGCTCTTACCACATCTTTGAAGTCCTACAATAATACATAAAAAAATGTTACAGATCGGAAGAGCGG	TGCAGCTCTTACCACATCTTTGAAGTCCTATAATAATACATAAAAAAAAGTTACAGATCGGAAGAGCGG	chr6	753611355	1	4.91e-19	Minus	48:T>A	0	0	0	0	0	0	0	0	0	0	0	-	0	0	0	0	0	0	0	0	0	-	0	0	0	0	-	0	0	0	-	-	0	0	0	0	1	0	0	0
D09712	13909686	TGCAGCTGCAATGAAGCGCCCATTGGGAGATATAGTAGCCATGTTATTTTTACAGATCGGAAGAGCGGT	TGCAGCTGCAATGAACCGCCCATTGGGAGATATAGTAGCCATGTTATTTTTACAGATCGGAAGAGCGGT	chr5	390056237	1	1.7e-18	Plus	15:G>C	0	-	0	0	0	0	0	0	0	0	-	0	0	0	0	-	0	0	-	0	-	0	0	0	0	0	0	-	0	0	0	-	0	0	-	-	0	0	0	-
D09718	3518902	TGCAGCTTATGAAAATAAGTTCATAACAACTTGAAGGCGTATTTTACAGATCGGAAGAGCGGTTCAGCA	TGCAGCTTATGAAAATAAGTTTATAACAACTTGAAGGCGTATTTTACAGATCGGAAGAGCGGTTCAGCA	chr5	889463215	1	2.94e-15	Minus	21:C>T	2	0	0	0	0	0	0	0	0	0	-	0	0	0	0	1	0	0	-	0	0	0	0	0	0	0	0	0	0	0	0	0	0	0	0	-	0	0	0	0
D09724	32610825	TGCAGCTTTATCCGGCCACATCAGAACTTTTCCAATAACATTTCAAAAAAAGTGTTTACAGATCGGAAG	TGCAGCTTTATCTGGCCACATCAGAACTTTTCCAATAACATTTCAAAAAAAGTGTTTACAGATCGGAAG	chr1S	315459169	1	9.73e-22	Minus	12:C>T	0	0	0	0	0	0	0	0	0	0	0	0	0	-	0	0	0	0	0	0	0	0	-	0	0	0	0	0	0	0	0	0	0	0	0	0	0	0	0	0
D09740	13911980	TGCAGGAAGCTCGAAAGGAATTGATTACAGATCGGAAGAGCGGTTCAGCAGGAATGCCGAGACCGATCT	TGCAGGATGCTCGTAAAGAATTGGTTACAGATCGGAAGAGCGGTTCAGCAGGAATGCCGAGACCGATCT	chr1L	1218045296	1	4.48e-06	Plus	7:A>T	0	0	2	0	0	0	0	0	0	0	2	0	0	0	0	0	0	0	1	0	0	0	0	0	-	0	-	-	0	0	0	0	0	0	0	0	2	0	0	-
D09744	39969507	TGCAGGACCGGTATCCACCATTTTCGATGTCTGCATTGTAAACAAACATTACAGATCGGAAGAGCGGTT	TGCAGGACCGGTATCCACCATTTTCGATGTCTGCATTGTAAACAACCATTACAGATCGGAAGAGCGGTT	chr1L	1098202133	1	5.87e-18	Plus	45:A>C	0	0	0	0	0	0	0	0	0	0	0	2	0	0	0	0	0	-	-	0	0	0	0	0	0	0	0	-	0	0	-	0	0	0	0	0	0	0	0	-
D09746	13868324	TGCAGGAGAATAACTTAGTCGTCTGTTTTGTAAATCTGCGAGGTAAATTACAGATCGGAAGAGCGGTTC	TGCAGGAGAATAACTTAGTCGTCTGTTTTGTAAATCTGCAAGGTAAATTACAGATCGGAAGAGCGGTTC	chr6	1388272630	1	2.11e-17	Minus	39:G>A	0	-	-	0	0	0	0	-	0	0	0	0	0	0	-	-	0	0	0	-	0	0	0	-	0	0	0	0	0	0	0	0	0	0	0	0	0	-	0	0
D09760	3514822	TGCAGGATGATTGCAGTCAAGGTTCAATATACAACTAATAAATTACAGATCGGAAGAGCGGTTCAGCAG	TGCAGGATGATTGGAGTCAAGGTTCAATATACAACTAATAAATTACAGATCGGAAGAGCGGTTCAGCAG	chr3	1022709050	1	1.01e-14	Minus	13:C>G	0	0	0	0	0	0	0	0	-	0	0	0	0	-	0	0	0	0	0	0	0	0	0	0	0	0	0	0	0	-	0	0	0	0	0	-	0	0	-	0
D09761	3514822	TGCAGGATGATTGCAGTCAAGGTTCAATATACAACTAATAAATTACAGATCGGAAGAGCGGTTCAGCAG	TGCAGGATGATTGCAGTCAAAGTTCAATATACAACTAATAAATTACAGATCGGAAGAGCGGTTCAGCAG	chr3	1022709043	1	1.01e-14	Minus	20:G>A	0	0	0	0	0	0	0	0	-	0	0	0	0	1	0	0	2	0	0	0	0	0	0	0	0	0	0	0	0	-	0	0	0	0	0	-	0	2	-	0
D09766	32611414	TGCAGGCAAAGGTATTACGGACCAGATGCTGTGAAGATTTTATTCATTTACAGATCGGAAGAGCGGTTC	TGCAGGCAAAGGTATTACAGACCAGATGCTGTGAAGATTTTATTCATTTACAGATCGGAAGAGCGGTTC	chr6	749851717	1	2.11e-17	Minus	18:G>A	0	0	0	2	0	0	0	0	0	0	0	0	0	0	-	-	0	0	0	0	1	0	0	0	0	0	-	-	0	0	0	0	0	0	0	-	0	-	-	0
D09772	39979561	TGCAGGCCCAAAGAAGAAGGTGGACTCGGTATAAGGCATATAGGATACTTTACAGATCGGAAGAGCGGT	TGCAGACCCAAAGAAGAAGGTGGACTCGGTATAAGGCATATAGGATACTTTACAGATCGGAAGAGCGGT	chr1L	1419730558	1	1.7e-18	Plus	5:G>A	0	0	1	0	1	0	0	0	0	0	0	0	0	-	0	0	0	0	0	0	0	2	0	0	0	0	0	0	0	0	1	0	0	0	2	-	0	0	0	0
D09807	3521500	TGCAGGTCAGCACTCATGAAGAGGCTCTGCAAAGTCAAGAAGTTACAGATCGGAAGAGCGGTTCAGCAG	TGCAGGTCAGCACTCATGAAGAGGCTCTGCAAAGTCAAGAAATTACAGATCGGAAGAGCGGTTCAGCAG	chr6	553427753	1	1.01e-14	Minus	41:G>A	0	-	0	-	0	2	-	0	0	0	0	0	0	0	0	2	0	1	-	0	-	0	-	2	0	0	0	0	0	0	0	0	-	0	-	0	0	0	0	0
D09812	39976171	TGCAGGTGAAGACGACTCGTTGCTGCATTGCTCTTTACAGATCGGAAGAGCGGTTCAGCAGGAATGCCG	TGCAGGTGAAGCCGACTCGTTGCTGCATTGCTCTTTACAGATCGGAAGAGCGGTTCAGCAGGAATGCCG	chr1L	1283385087	1	1.63e-10	Plus	11:A>C	0	0	0	0	0	0	-	0	0	-	0	0	0	0	0	0	0	0	0	0	-	0	0	0	0	0	0	0	0	0	0	0	0	-	0	1	0	0	0	-
D09819	32610082	TGCAGGTTAGTGGTTAGTGTTTCGACAAGTTATTACAGATCGGAAGAGCGGTTCAGCAGGAATGCCGAG	TGCAGGTTAGTGGTTCGTGTTTCGACGAGTTATTACAGATCGGAAGAGCGGTTCAGCAGGAATGCCGAG	chr2	1368723641	1	1.92e-09	Minus	15:A>C	0	0	0	0	0	0	0	0	0	0	-	0	0	0	0	0	0	0	-	0	0	0	-	0	0	-	0	0	0	0	0	0	0	0	0	-	0	0	0	-
D09821	32610085	TGCAGGTTGAGATTGAAGTTGATCCGGTGAAAGAGGAGCAGTCAAAGGTTACAGATCGGAAGAGCGGTT	TGCAGGTTGAGATTGAAGCTGATCCGGTGAAAGAGGAGCAGTCAAAGGTTACAGATCGGAAGAGCGGTT	chr5	867765557	1	5.87e-18	Plus	18:T>C	0	0	-	-	0	0	0	0	0	0	0	0	0	0	0	0	0	0	0	-	0	-	0	0	0	-	0	-	0	1	1	0	0	-	0	0	0	0	0	-
D09835	13868663	TGCAGTAAGAGGTACTATATTGCTACTTCATTGCCGAACCATTAGAAAAAAATTGTTACAGATCGGAAG	TGCAGTAAGAGGTACTATATTGCTATTTCATTGCCGAACCATTAGAAAAAAATTGTTACAGATCGGAAG	chr1S	1550319043	1	9.73e-22	Minus	25:C>T	0	-	-	-	0	2	0	-	-	0	0	0	0	-	-	0	2	0	0	0	-	0	0	-	0	0	0	0	0	0	-	0	0	0	0	0	0	0	0	0
D09846	18319370	TGCAGTACACCGTAGTTCCAAAATCATTACAGATCGGAAGAGCGGTTCAGCAGGAATGCCGAGACCGAT	TGCAGTATACCGTAGTTCCAAAATCATTACAGATCGGAAGAGCGGTTCAGCAGGAATGCCGAGACCGAT	chr3	1540741976	1	2.07e-06	Minus	7:C>T	0	0	0	0	0	0	0	-	0	0	-	0	0	0	0	0	0	0	-	0	0	0	0	-	0	0	0	-	1	0	0	-	0	0	0	0	0	0	-	2
D09861	3530957	TGCAGTAGTTTCGAACAAAGTCATTCAATAATTAGGCTTCAATTTGGAATTCATTACAGATCGGAAGAG	TGCAGTAGTTTCGAACAAAGTCATTCAATAATTAGACTTCAATTTGGAATTCATTACAGATCGGAAGAG	contig_6511	259219	1	4.24e-20	Minus	35:G>A	0	0	0	0	2	0	0	0	0	0	0	0	0	0	-	0	0	0	0	0	0	-	0	0	0	0	0	-	0	0	0	0	-	0	0	0	0	-	-	-
D09867	32610094	TGCAGTATTCAAAATAACGGTCGATTAGGAGCATTTTACAGATCGGAAGAGCGGTTCAGCAGGAATGCC	TGCAGTATTCAAAATAACGGTCAATTAGGAGCATTTTACAGATCGGAAGAGCGGTTCAGCAGGAATGCC	chr2	1035243144	1	4.94e-11	Minus	22:G>A	0	0	0	0	0	0	0	-	0	-	0	0	0	0	0	0	0	0	0	0	1	0	2	2	0	0	0	0	0	0	0	0	0	2	0	1	0	2	0	-
D09876	32611439	TGCAGTCATGAATTGATACATTCGAAAATTTTACAGATCGGAAGAGCGGTTCAGCAGGAATGCCGAGAC	TGCAGTCATAAATTGATACATTCGAAAATTTTACAGATCGGAAGAGCGGTTCAGCAGGAATGCCGAGAC	chr4	1107383045	1	1.98e-08	Plus	9:G>A	0	-	0	0	0	0	0	-	-	0	-	0	0	0	0	-	0	-	0	0	0	0	0	0	-	0	0	-	0	0	0	0	0	0	2	0	0	0	0	0
D09877	32610104	TGCAGTCATTGGTGTCTTCCCGGGGTCCCTGATGCATGGAATGAATTACAGATCGGAAGAGCGGTTCAG	TGCAGTCATTGGTGTCTTCCCGGGGTTCCTGATGCATGGAATGAATTACAGATCGGAAGAGCGGTTCAG	chr4	1449425252	1	2.5e-16	Plus	26:C>T	0	0	0	0	0	0	0	0	0	0	0	0	0	0	0	0	0	0	-	0	0	0	0	0	0	0	0	0	0	0	0	0	0	0	0	0	0	0	0	0
D09882	22857617	TGCAGTCGAAAGAAAAATGAGCTGACAAAGAGTCTGCCGAAATTAGGTTTTACAGATCGGAAGAGCGGT	TGCAGTCGAAAGAAAAATAAGCTGACAAAGAGTCTGCCGAAATTAGGTTTTACAGATCGGAAGAGCGGT	chr2	91351178	1	1.7e-18	Plus	18:G>A	0	0	0	-	0	0	0	0	0	0	0	0	0	0	0	0	0	0	0	0	0	0	0	1	0	0	-	0	0	0	-	0	-	0	0	0	0	0	0	0
D09884	3523423	TGCAGTCGGCTGTTGGAAGGAGATTGGACAACTCGTTTACAGATCGGAAGAGCGGTTCAGCAGGAATGC	TGCAGTCGGCTGTTGGAAGGAGATTGGACAACTTGTTTACAGATCGGAAGAGCGGTTCAGCAGGAATGC	chr4	702664303	1	1.49e-11	Plus	33:C>T	0	0	1	0	0	0	-	0	-	-	0	0	0	0	0	0	0	-	-	0	-	0	0	0	0	-	0	0	0	0	0	-	0	0	-	-	0	-	2	0
D09885	3521714	TGCAGTCGGTCGTGAGTCGCAACAACATAATTTTTACAGATCGGAAGAGCGGTTCAGCAGGAATGCCGA	TGCAGTCGGTCGTGAGTAGCAACAACATAATTTTTACAGATCGGAAGAGCGGTTCAGCAGGAATGCCGA	chr5	251685004	1	5.86e-10	Minus	17:C>A	0	0	0	0	0	0	0	0	0	0	0	0	0	0	0	0	0	0	0	0	0	0	0	2	0	0	0	0	0	0	0	0	0	0	0	1	0	0	0	0
D09900	39970186	TGCAGTGATTTATGGTCCATCATTCCTTACATTTTTGAAATTTTACAGATCGGAAGAGCGGTTCAGCAG	TGCAGTGATTTATGGTTCATCATTCCTTACATTTTTGAAATTTTACAGATCGGAAGAGCGGTTCAGCAG	chr5	907665645	1	1.01e-14	Plus	16:C>T	0	0	0	0	0	0	0	0	0	0	0	0	0	0	0	0	0	0	0	0	0	0	0	0	0	1	0	0	0	0	0	0	-	0	0	0	0	-	0	0
D09914	13909844	TGCAGTGTAATCATGGAAATAAAATTATTTTCCATTGTTTATTTTACAGATCGGAAGAGCGGTTCAGCA	TGCAGTGTAATCATGGAAATAAAATTATTTCCCATTGTTTATCTTACAGATCGGAAGAGCGGTTCAGCA	chr1S	367380165	1	3.81e-14	Minus	42:T>C	0	0	0	-	0	0	0	-	0	0	0	0	0	0	0	-	0	-	0	0	0	0	0	-	0	0	0	0	0	0	0	-	-	0	0	0	0	-	-	-
D09915	3519650	TGCAGTGTACACTGTGTAAAGTGTTAGTAATATTTTTAGCATTTATTACAGATCGGAAGAGCGGTTCAG	TGCAGTGTACACTGTGTAAAGTGTTAGTAATATTTTTATCATTTATTACAGATCGGAAGAGCGGTTCAG	chr4	773260595	1	2.5e-16	Minus	38:G>T	0	0	0	0	0	0	0	0	0	0	2	0	0	-	-	0	0	0	0	0	0	0	0	0	0	0	0	0	0	0	0	0	0	2	0	0	0	0	0	0
D09922	39976475	TGCAGTTAGTGATCTCAGTCGTTGATCAAGTTCAGACGATTACAGATCGGAAGAGCGGTTCAGCAGGAA	TGCAGTTAGTGATCTCAATTGTTGATCAAGTTCGGACGATTACAGATCGGAAGAGCGGTTCAGCAGGAA	chr6	974269777	1	3.94e-13	Minus	17:G>A	0	0	0	0	0	0	0	-	-	-	0	-	0	0	0	-	0	0	0	-	0	-	0	-	0	0	-	0	0	0	0	0	0	0	-	0	0	0	0	0
D09930	32610116	TGCAGTTATGTGCAAGACTACAGGCCTTGTTAGAACACATTACAGATCGGAAGAGCGGTTCAGCAGGAA	TGCAGTTATGTGCAATACTACAGGCCTTGTTAGAACACATTACAGATCGGAAGAGCGGTTCAGCAGGAA	contig_5009	236804	1	3.94e-13	Plus	15:G>T	0	0	0	0	0	0	0	0	0	-	0	0	0	0	0	0	0	0	0	0	0	0	0	1	0	0	0	-	0	0	0	-	0	0	-	-	0	-	2	-
D09944	32610117	TGCAGTTGAAAAGTTCCATAGGCAGTCTACCAAAAAGATAATTCGATGAGACATTACAGATCGGAAGAG	TGCAGTTGAAAAGTTCCATAGGCAGTCTACCAGAAAGATAATTCGATGAGACATTACAGATCGGAAGAG	chr3	486320865	1	1.18e-20	Plus	32:A>G	0	2	0	0	0	0	0	0	0	0	-	2	0	-	-	0	0	0	0	0	0	-	0	0	0	0	0	0	0	0	0	0	-	-	0	-	0	0	0	0
D09959	39970475	TGCAGTTTCCAGGCCTAAAGTCAAACCCGATTTTTTACAGATCGGAAGAGCGGTTCAGCAGGAATGCCG	TGCAGTTTCCCGGCCTAAAGTCAAACCCGATTTTTTACAGATCGGAAGAGCGGTTCAGCAGGAATGCCG	chr1L	879514169	1	1.63e-10	Minus	10:A>C	0	0	0	0	0	0	0	0	-	0	0	0	0	0	0	0	0	0	0	0	0	0	0	-	0	0	0	0	0	0	0	0	0	0	0	0	0	0	0	-
D09960	32610122	TGCAGTTTCCTCACTAACAATACGTTTGTCCACATCAAATCTTTTACAGATCGGAAGAGCGGTTCAGCA	TGCAGTTTCCTCACTAAGAATACGTTTGTCCACATCAAATCTTTTACAGATCGGAAGAGCGGTTCAGCA	contig_8201	133925	1	2.94e-15	Plus	17:C>G	0	0	0	0	0	0	0	0	0	0	0	0	0	0	0	0	1	0	0	0	0	0	0	0	0	2	0	0	0	0	0	0	0	0	0	0	0	0	0	-
D09970	3521614	TGCAGAAAAGATATGAATTGAAGCATTTGTATTGATTTTTACAGATCGGAAGAGCGGTTCAGCAGGAAT	TGCAGAAAAGATATGAATTGAAGCATCTGTATTGATTTTTACAGATCGGAAGAGCGGTTCAGCAGGAAT	chr4	1334968524	1	1.33e-12	Minus	26:T>C	0	0	0	0	2	0	0	0	2	0	0	1	0	0	0	0	0	0	0	0	0	0	0	0	0	-	0	-	0	0	0	-	0	0	0	0	-	0	0	-
D09972	32609967	TGCAGAAACAGAAACATGCTCTTGCAAAACAGTTACAGATCGGAAGAGCGGTTCAGCAGGAATGCCGAG	TGCAGAAACAGAAACATGCTCTTGCGAAACAGTTACAGATCGGAAGAGCGGTTCAGCAGGAATGCCGAG	contig_6480	145271	1	1.92e-09	Plus	25:A>G	0	0	-	0	0	0	-	0	-	0	0	0	0	-	0	0	0	0	0	0	-	0	0	0	0	-	0	0	0	0	-	0	0	2	0	0	0	-	0	-
D09979	3518650	TGCAGAAGGTAATTATTTGCTATTTCACATATATTTTTCGGTTTTTTTACAGATCGGAAGAGCGGTTCA	TGCAGAAGGTAATTATTTGCTATTTCACATATATTTTTCGTTTTTTTTACAGATCGGAAGAGCGGTTCA	chr1L	1441122510	1	7.27e-17	Minus	40:G>T	0	0	0	0	0	0	0	0	0	0	0	0	0	0	0	0	0	0	0	-	0	-	0	-	-	0	0	0	0	0	0	0	0	0	0	0	-	0	2	0
D10022	13909646	TGCAGCATCACTGGCTTGACCAGTGGGGAAAGGCCTATTGGGATCCTTTACAGATCGGAAGAGCGGTTC	TGCAGCATCACCGGCTTGACCAGTGGGGAAAGGCCTATTGAGATCCTTTACAGATCGGAAGAGCGGTTC	chr3	1179344179	1	2.11e-17	Plus	11:T>C	0	0	0	0	-	2	0	0	-	0	0	0	0	0	0	0	0	0	0	0	1	0	0	0	0	-	0	0	0	0	0	0	0	0	-	0	0	0	2	0
D10057	39976215	TGCAGTAAAAAGTGACCGAACAAAATAATTTACAGATCGGAAGAGCGGTTCAGCAGGAATGCCGAGACC	TGCAGTAAAAAGTGACCAAACAAAATAATTTACAGATCGGAAGAGCGGTTCAGCAGGAATGCCGAGACC	chr2	679720403	1	6.24e-08	Plus	17:G>A	0	0	0	0	0	0	0	0	0	0	0	0	0	-	-	0	0	0	0	0	0	2	0	1	0	0	0	0	2	0	0	0	2	-	0	0	0	0	0	-
D10058	39976221	TGCAGTAAAGGATCTATTATTGATGAAACTACATTTTTATTACAGATCGGAAGAGCGGTTCAGCAGGAA	TGCAGTAAAGGATCCATTATTGATGAAACTACATTTTTATTACAGATCGGAAGAGCGGTTCAGCAGGAA	chr3	52166950	1	3.94e-13	Plus	14:T>C	0	0	0	0	0	0	2	0	0	0	0	0	-	0	0	-	0	0	0	0	0	0	0	0	2	0	0	0	2	0	0	-	0	0	0	-	0	0	0	-
D10059	39976221	TGCAGTAAAGGATCTATTATTGATGAAACTACATTTTTATTACAGATCGGAAGAGCGGTTCAGCAGGAA	TGCAGTAAAGGATCTATTATTGATGAAACTACATTTTTTTTACAGATCGGAAGAGCGGTTCAGCAGGAA	chr3	52166974	1	3.94e-13	Plus	38:A>T	0	0	0	0	0	0	0	0	0	0	0	0	-	0	0	-	0	0	0	0	0	0	0	0	0	0	0	0	0	0	0	-	0	0	0	-	0	0	0	-
D10066	39980213	TGCAGTAGCAAGAGAGAAAGAATGTGAATGTGGCTGAACATTTTACAGATCGGAAGAGCGGTTCAGCAG	TGCAGTTGCAAGAGAGAAAGAATGTGAATGTGGCTGAACATTTTACAGATCGGAAGAGCGGTTCAGCAG	chr3	817266736	1	1.01e-14	Plus	6:A>T	0	0	0	0	0	0	0	0	0	0	0	0	0	0	0	-	0	0	-	0	0	0	0	-	0	0	0	-	0	0	0	0	0	0	0	0	0	0	0	0
D10079	39976370	TGCAGTCTTACTCTTACCCGTGGCCTGCATCATTCAACATTATTACGCATTTCAATTACAGATCGGAAG	TGCAGTCTTACTCTTAACCGTGGCCTGCATCATTCAAAATTATTACGCATTTCAATTACAGATCGGAAG	chr2	1103241853	1	9.73e-22	Minus	16:C>A	0	-	-	0	0	0	0	0	0	0	0	0	0	0	0	0	0	0	0	0	0	0	0	0	0	-	0	-	0	0	0	0	0	0	0	0	0	-	0	0
D10110	32609963	TGCAGAAAAAATCCACACATAACAATTTACAGATCGGAAGAGCGGTTCAGCAGGAATGCCGAGACCGAT	TGCAGAAAAAATCCACATGTAACAATTTACAGATCGGAAGAGCGGTTCAGCAGGAATGCCGAGACCGAT	chr1S	359737089	1	2.07e-06	Minus	17:C>T	0	-	0	0	0	0	0	0	0	0	-	0	0	0	-	0	0	0	0	0	-	0	0	0	0	-	0	0	0	0	-	0	-	-	0	-	0	0	-	-
D10117	39968904	TGCAGCAAAGCTGATAAAAGACAGACTATTTAGTAACTCGAGAAAATTACAGATCGGAAGAGCGGTTCA	TGCAGCAAATCTGATAAAAGACAGACTATTTAGTAACTCGAGAAAATTACAGATCGGAAGAGCGGTTCA	chr1S	988834385	1	7.27e-17	Minus	9:G>T	0	-	0	0	0	0	0	0	-	0	-	0	0	0	0	-	0	0	-	0	0	0	0	0	0	-	0	0	0	0	0	0	0	-	0	0	0	-	0	0
D10232	18321392	TGCAGCTTTCAAATGCCGTTCCTTTCTTTCAAGACGGGAATAATCTTCGCTCAAAGTTTTACAGATCGG	TGCAGCTTTCAAATGCCGTTCCTTCCTTTCAAGACGAGAATAATCTTCGCTCAAAGTTTTACAGATCGG	chr1S	1550319089	1	2.29e-23	Plus	24:T>C	0	-	-	0	0	0	0	0	0	0	0	0	0	0	0	0	0	0	0	0	0	0	0	0	0	0	0	-	0	0	0	0	0	0	0	0	0	0	0	0
D10233	18321392	TGCAGCTTTCAAATGCCGTTCCTTTCTTTCAAGACGAGAATAATCTTCGCTCAAAGTTTTACAGATCGG	TGCAGCTTTCAAATGCCGTTCCTTTCTTTCAAGACGGGAATAATCTTCGCTCAAAGTTTTACAGATCGG	chr1S	1550319101	1	1.07e-21	Plus	36:A>G	1	-	-	1	1	1	1	1	1	1	1	1	1	1	1	1	1	1	1	1	1	1	1	1	1	1	1	-	1	1	1	1	1	1	1	1	1	1	1	1
D10246	18318733	TGCAGAAACATATTCACATTCTATAGATCCATTATTCAAACAAATAATTTTATTATTGTTCCACAAGAA	TGCAGAAACATATTCACATTGTATAGATCCATTATTCAAACAAATAATTTTATTATTGTTCCACAAGAA	chr1L	512732359	1	9.88e-28	Plus	20:C>G	0	0	0	0	0	0	0	0	0	-	0	0	0	0	0	0	0	0	0	0	0	0	0	0	0	0	0	-	0	0	-	0	0	0	0	0	0	0	2	0
D10247	18318733	TGCAGAAACATATTCACATTCTATAGATCCATTATTCAAACAAATAATTTTATTATTGTTCCACAAGAA	TGCAGAAACATATTCACATTCAATAGATCCATTATTCAAACAAATAATTTTATTATTGTTCCACAAGAA	chr1L	512732360	1	9.88e-28	Plus	21:T>A	0	0	0	2	0	0	2	0	0	1	0	0	0	0	0	2	0	0	0	0	0	0	0	0	0	0	0	1	0	0	-	0	0	0	0	0	0	0	0	0
D10248	18318733	TGCAGAAACATATTCACATTCTATAGATCCATTATTCAAACAAATAATTTTATTATTGTTCCACAAGAA	TGCAGAAACATATTCACATTCTATAGATCCATTATTCAAACAACTAATTTTATTATTGTTCCACAAGAA	chr1L	512732382	1	9.88e-28	Plus	43:A>C	0	0	2	0	2	0	0	0	0	-	0	0	0	0	0	0	0	0	0	0	0	0	0	0	0	0	0	-	0	0	1	0	0	0	0	0	0	0	0	0
D10254	32609340	TGCAGAAAGAAAAGAAACCAGAAGAATATTACACAGTTTACACTTGGAAGATCCTGCTATACGCTTCTC	TGCAGAAAGAAAAGAAACCAGAAGAATATTACATAGTTTACACTTGGAAGATCCTGCTATACGCTTCTC	chr6	1079227964	1	9.88e-28	Plus	33:C>T	0	0	0	0	0	0	0	0	-	0	2	0	0	0	-	0	-	0	-	0	-	0	0	0	0	0	-	0	0	0	0	-	-	-	0	0	0	0	0	-
D10255	32609340	TGCAGAAAGAAAAGAAACCAGAAGAATATTACACAGTTTACACTTGGAAGATCCTGCTATACGCTTCTC	TGCAGAAAGAAAAGAAACCAGAAGAATATTACACAGTTTACACTTGGAAGATCCTGCTATAAGCTTCTC	chr6	1079227992	1	9.88e-28	Plus	61:C>A	0	0	0	0	0	0	0	0	1	0	0	0	0	0	-	0	-	0	-	0	-	0	0	0	0	0	-	0	0	0	0	-	-	-	0	0	0	0	0	-
D10258	13908632	TGCAGAAAGATACGACAACCTTGTCAAATGAAGCTACAGGTGATGGACGGCCCTGTCCTGGGTTAGATC	TGCAGAAAGATACGACAACCTTGTCAAATGAAGCTACAGGTGATGGACGGTACTGTCCTGGGTTAGATC	chr3	1392837050	1	9.88e-28	Minus	50:C>T	0	-	0	-	0	0	0	-	0	0	-	0	0	0	0	0	0	0	-	0	0	0	0	0	0	0	0	0	0	0	0	0	0	0	0	-	0	0	0	-
D10260	13908634	TGCAGAAAGATATACCGAGAGAGATGATTGTTTCTTGTAACATTTGTGTGCAGCGACGAATAATTGAGT	TGCAGAAAGATATACAGAGAGAGATGATTGTTTCTTGTAACATTTGTGTGCAGCGACGAATAACTGAGT	chr5	1183251649	1	9.88e-28	Plus	63:T>C	0	0	0	0	0	0	0	0	0	0	0	0	0	0	0	-	0	0	0	0	-	0	0	0	0	0	0	-	0	0	0	-	0	0	0	-	0	-	0	-
D10271	13908652	TGCAGAACAAAACCTACTCCATCTTTTCTCCCTCCCTAACTTCAATTTTTATGTCCCAAACCCACCTTA	TGCAGAACAAAACCTACTCCATCTTTTCTCCCTCCCTAACTTCAGTTTTTATGTCCCAAACCCACCTTA	chr2	130147818	1	9.88e-28	Plus	44:A>G	0	0	-	-	0	0	0	0	-	0	0	-	0	-	0	-	0	0	0	0	-	1	0	0	0	0	-	0	0	0	0	0	0	0	0	0	0	0	0	0
D10272	13908652	TGCAGAACAAAACCTACTCCATCTTTTCTCCCTCCCTAACTTCAATTTTTATGTCCCAAACCCACCTTA	TGCAGAACAAAACCTACTCCATCTTTTCTCCCTCCCTAACTTCAATTTTTGTGTCCCAAACCCACCTTA	chr2	130147824	1	9.88e-28	Plus	50:A>G	0	0	-	-	0	0	0	0	-	0	0	-	0	-	0	-	0	0	0	0	-	-	0	0	0	0	-	0	0	0	0	0	0	0	0	0	0	2	0	0
D10273	13908652	TGCAGAACAAAACCTACTCCATCTTTTCTCCCTCCCTAACTTCAATTTTTATGTCCCAAACCCACCTTA	TGCAGAACAAAACCTACTCCATCTTTTCTCCCTCCCTAACTTCAATTTTTATGTCCTAAACCCACCTTA	chr2	130147830	1	9.88e-28	Plus	56:C>T	0	0	-	-	0	0	0	0	-	0	0	-	0	-	0	-	0	0	0	0	-	-	0	0	0	0	-	0	0	0	0	0	0	0	0	0	0	0	0	0
D10282	3518409	TGCAGAACCACCAGCTACCGAAGAAGGAACAGGAGCACTTGGAGTCCATATCTAGAGTAATCCACCACC	TGCAGAACCACCAGCTACTGAAGAAGGAACAGGAGCACTTGGAGTCCATATCTAGAGTAATCCACCACC	chr2	1012402105	1	9.88e-28	Plus	18:C>T	0	0	0	-	0	0	0	-	0	0	0	0	0	0	0	0	0	0	2	0	0	0	0	0	0	0	-	-	0	0	0	0	0	0	2	0	-	0	0	0
D10344	13868740	TGCAGAATCTAATACCTGTGCAACATCAGCTGGGGGAAATTGTCTTTCCGTACACTTCTGCATTTTGTT	TGCAGAATCTAATACCTGTGCAACATCAGCCGGGGGAAATTGTCTTTCCGTACACTTCTGCATTTTGTT	chr4	1313007879	1	9.88e-28	Minus	30:T>C	0	0	0	0	0	0	0	0	0	0	-	0	0	-	0	0	0	0	0	0	1	0	0	1	0	0	-	1	0	0	0	0	-	0	0	0	2	0	0	-
D10364	13904356	TGCAGAATTGGCCTCTAAGCTTGATGATAAGGATTTGAATAGTTTACCATTACCCGGGCAAGTTGATTT	TGCAGAATTGGCTTCTAAGCTTGATGATAAGGATTTGAATAGTTTACCATTACCCGGGCAAGTTGATTT	chr1S	631149586	1	9.88e-28	Plus	12:C>T	0	0	0	0	0	0	0	0	0	0	-	0	0	0	-	0	0	0	0	0	0	-	0	-	0	0	0	0	0	0	-	0	-	-	0	2	0	0	2	0
D10387	13908700	TGCAGACAGTTGATTGGTTCCATGTCAGTTAGTGTGAGGTACTAGCTCTTTGTGTAGGGTAGTTTTGAA	TGCAGACAGTTGATTGGCTCCATGTCAGTTAGTGTTAGGTACTAGCTCTTTGTGTAGGGTAGTTTTGAA	chr5	835328912	1	9.88e-28	Minus	17:T>C	0	0	0	-	0	0	0	-	0	0	0	0	0	-	-	-	0	0	0	0	0	0	-	0	0	0	0	-	-	0	-	0	0	0	0	0	0	0	-	0
D10388	13908700	TGCAGACAGTTGATTGGTTCCATGTCAGTTAGTGTGAGGTACTAGCTCTTTGTGTAGGGTAGTTTTGAA	TGCAGACAGTTGATTGGTTCCATGTCAGTTAGTGTTAGGTACTAGCTCTTTGTGTAGGGTAGTTTTGAA	chr5	835328894	1	9.88e-28	Minus	35:G>T	0	0	0	-	0	0	0	-	0	0	0	0	0	-	-	-	0	0	0	0	0	0	-	0	0	0	0	-	-	0	-	0	0	0	0	0	0	0	-	0
D10398	39977072	TGCAGACCATGGATGGCCAATATCTGACTGCACAGCAGAAGGACTGAAAGTAATTATTTCGGAAAAAAC	TGCAGACCATGGATGGCCAATATCTGACTGCACAGCAGAAGGACTGAAAGTAATTATTTTGGAAAAAAC	chr1S	1026954380	1	9.88e-28	Minus	59:C>T	0	0	0	0	0	0	0	0	0	0	-	0	0	-	-	-	0	0	0	0	0	-	0	0	-	0	0	0	0	0	0	0	0	0	0	-	0	0	0	0
D10409	3520100	TGCAGACTCAATTTTGATTTCTCACCTATCATGCTAGGTAATCAATTTGGGTAGCTCATCTACTGTGGG	TGCAGACTCAATTTTGATTTCTCACCTATCATGATAGGTAATCAATTTGGGTAGCTCATCTACTGTGGG	contig_7601	207331	1	9.88e-28	Minus	33:C>A	0	0	-	0	0	0	0	-	-	-	0	0	0	0	0	0	0	0	0	0	0	0	0	0	0	0	0	-	0	1	0	0	0	0	0	0	0	-	0	-
D10413	39977098	TGCAGACTTCCTATCATACAAATTTTTTCCCTATGAATATAATCGATTTTTTCCCCTCTTATGTACGGA	TGCAGACTTCCTATCATACAAATTTTTTCCCTATGAATATAATCGATTTTTTCCCCTCTTCTGTACGGA	chr5	474907380	1	9.88e-28	Minus	60:A>C	0	0	-	0	0	0	0	0	-	0	0	0	0	-	1	-	0	0	0	-	-	0	0	0	0	0	0	0	0	0	0	0	0	0	-	0	0	0	0	-
D10432	3526092	TGCAGAGACTAATCCCTCGTGGCAGGGAAGACCACAATGAGCAGCAAAGCTCTCCCTCAAAAGAATTTA	TGCAGAGACTAATCCCTCGAGGCAGGGAAGACCACAATGAGCGGCAAAGCTCTCCCTCAAAAGAATTTA	chr3	939739469	1	9.88e-28	Minus	19:T>A	0	0	0	0	0	0	0	0	0	0	0	0	0	-	0	-	0	-	0	0	0	-	0	0	0	0	0	0	0	0	0	0	0	0	0	0	0	0	-	0
D10437	39980369	TGCAGAGAGCTGTGAAATCAGGCTCTCTTTCATATATAAAGGGATTATATAGGTGCTAGCTTTTTACAG	TGCAGAGAGCTGTGAAATCAGGCTCTCTTTCATATATAAAGGGATTATATAGGTGCTAGCTTTTTAAGT	chr6	0	1	4.6e-26	Plus	68:G>T	0	0	0	0	0	0	0	0	-	0	-	0	0	0	-	-	0	0	0	0	-	0	0	0	0	0	0	0	0	0	0	0	0	0	0	0	0	0	0	0
D10439	39964109	TGCAGAGATACTATTTCTTTGCAAAACATGAGACTTGGAATCTGAAACTCGAAAGTGTGCTTTGAGGTC	TGCAGAGATACTATTTCTTTGCAAAACATGAGACTTGGTATCTGAAACTCGAAAGTGTGCTTTGAGGTC	chr4	1601956539	1	9.88e-28	Plus	38:A>T	0	0	0	0	0	0	0	0	0	0	0	0	0	0	-	0	0	0	0	0	0	0	0	0	0	0	-	0	0	0	-	0	-	-	-	-	0	0	0	0
D10469	3524188	TGCAGAGGTATTCAGTATTCACGCTGAACTTCTCTTACATGAACTAAGTGCTCATGAATTCAGTTTACG	TGCAGAGGTATTCAGTATCCACGCTGAACTTCTCTTATATGAACTAAGTGCTCATGAATTCAGTTTACG	chr4	403778127	1	9.88e-28	Plus	18:T>C	0	-	0	0	0	0	0	0	-	0	0	0	0	-	0	0	0	0	-	0	0	0	0	-	0	0	0	0	0	0	0	0	0	0	0	-	1	0	-	0
D10481	13908752	TGCAGAGTGTGCCAATGAAAAACGCCACTGTGGAGTGTGCCAAAAGCAGATTTGCCTGTCTACTTCTTG	TGCAGAGTGTGCCAATGAAAAACGCCACTATGGAGTGTGCCAAAAGCAGATTTGCCTGTCTACTTCTTG	chr6	363666022	1	9.88e-28	Plus	29:G>A	0	0	-	0	0	0	0	0	0	-	-	0	0	-	-	-	0	-	0	-	0	0	0	0	0	0	0	0	0	0	0	0	-	0	0	0	0	0	0	0
D10484	3519545	TGCAGAGTTCACACAATGACTAAAGGTGAAAGACTATCATATCTTGTTTTAGAACATTTTACAGATCGG	TGCAGAGTTCACGCAATGACTAAAGATGAAAGACTATCATATCTTGTTTTAGAACATTTTACAGATCGG	chr1S	1024080873	1	2.29e-23	Minus	12:A>G	0	0	0	0	0	0	0	0	0	0	0	0	0	0	0	0	0	0	0	0	-	0	0	0	2	0	0	0	0	0	0	0	0	0	0	-	0	0	0	0
D10485	39979753	TGCAGAGTTCGTGGATGTTCTTGCTTCAAACGTTTATTTGAAAATCCCTGAAATGGCCTGATTCATGTA	TGCAGAGTTCGTGGATGTTCTTACTTCAGACGTTTATTTGAAAATCCCTGAAATGGCCTGATTCATGTA	chr6	924289368	1	9.88e-28	Minus	22:G>A	0	0	0	-	0	0	0	0	0	0	0	0	0	0	0	0	0	0	0	-	0	0	-	0	0	0	-	-	0	0	0	0	0	-	0	-	0	0	0	-
D10486	39979753	TGCAGAGTTCGTGGATGTTCTTGCTTCAAACGTTTATTTGAAAATCCCTGAAATGGCCTGATTCATGTA	TGCAGAGTTCGTGGATGTTCTTGCTTCAGACGTTTATTTGAAAATCCCTGAAATGGCCTGATTCATGTA	chr6	924289362	1	9.88e-28	Minus	28:A>G	0	0	0	-	0	0	0	0	0	0	0	0	0	2	0	0	0	0	0	-	0	0	1	0	0	0	-	-	0	0	0	0	0	-	0	-	0	0	0	-
D10504	18320277	TGCAGATACAGCAAGGTCTGACAAAGTTTCATTTGGTAATGATTTTGGCCTGTTCATGCTAGCCACAGC	TGCAGATACAGCAAGGTCTGACAAAGTTTCATTTGGTAATGATTTTGGTCTGTTCATGCTAGCCACAGC	chr4	1205130762	1	9.88e-28	Minus	48:C>T	0	0	0	-	0	0	0	0	0	0	0	0	0	0	0	0	0	0	0	0	0	0	0	0	0	0	0	0	0	0	-	0	0	0	0	0	0	0	0	0
D10510	13910592	TGCAGATATATAACTGTTCAAGTTTGCACACGTTGGATTGCACGGGGCTTTTCCACCTCACTTCCCTGC	TGCAGATATATAACTGTTCAAGTTTGCACACATTGGATTGCACGGGGCTTTTCCACCTCACTTCCCTGC	chr1L	1695952367	1	9.88e-28	Minus	31:G>A	0	0	-	0	0	2	0	-	0	0	-	0	0	0	0	-	-	0	0	0	0	0	0	-	0	-	1	0	1	0	0	0	-	0	0	-	0	0	2	-
D10516	39981162	TGCAGATATGTATGTATATTGTGTTTCACTGGCATATGACCGTTAGATTGCAATAAAAAAGTTACAGAT	TGCAGATATGTATGTATATTGTGTTTCAGTGGCATATGACCGTTAGATTGCAATAAAAAAGTTACAGAT	chr6	115401927	1	5.37e-25	Plus	28:C>G	0	0	0	0	0	0	0	0	0	0	0	0	0	-	0	0	0	0	-	0	0	0	0	-	-	0	0	0	0	0	0	0	0	0	0	-	0	0	0	0
D10519	3526819	TGCAGATATTCACTTTGATATACATGTCTAATAATCTTTTTGTAAGGTTTGAAAATTGTCTTACAGATC	TGCAGATATTCACTTTGATATACATGTCTAATAATCTTTTTGTAAGGTTTGAAAATTGTCTTAAAGACA	chr1S	0	1	1.88e-24	Plus	63:C>A	0	0	0	0	-	0	0	0	0	0	0	0	0	0	0	0	0	0	-	0	0	0	0	0	0	0	0	0	0	0	0	0	0	0	0	0	0	0	0	0
D10522	39978861	TGCAGATCAAATTCCAAAAGTCCAATAAAAAATGTGTCACAATGGTGCAAAACATGTCATGCATTTTAC	TGCAGATCAAATTCCAGAAGTCCAATAAAAAATGTGTCACAATGGTGCAAAACATGTCATGCATTTTAC	chr6	1272365478	1	3.55e-27	Plus	16:A>G	0	0	-	2	0	2	-	0	0	0	0	0	0	-	0	-	0	0	0	0	0	0	0	-	0	0	0	-	0	0	0	0	0	1	0	0	0	0	0	0
D10523	39978861	TGCAGATCAAATTCCAAAAGTCCAATAAAAAATGTGTCACAATGGTGCAAAACATGTCATGCATTTTAC	TGCAGATCAAATTCCAAAAGTCCAGTAAAAAATGTGTCACAATGGTGCAAAACATGTCATGCATTTTAC	chr6	1272365486	1	3.55e-27	Plus	24:A>G	0	0	-	0	0	0	-	0	0	0	0	0	0	-	0	-	0	0	0	0	0	0	0	-	0	0	0	-	0	0	0	0	0	1	2	0	0	0	0	0
D10539	3510578	TGCAGATCTAGAAACAATTGAACTCATTCTTGAAGCTTCTGAAGAATCTTCCAAATTCCTGCAACGTTC	TGCAGATCTAGAAACAACTGAACTCATTCTTGAAGCTTCTGAAGAATCTTCCAAATTCCTGCAACGTTC	chr4	592217141	1	9.88e-28	Plus	17:T>C	0	0	0	-	0	0	0	0	0	0	1	0	0	0	-	-	0	0	-	2	0	-	0	0	0	-	0	0	0	0	0	0	-	0	2	-	0	0	0	0
D10546	65683233	TGCAGATGAAGAGGGGTATGACTATGAAGATGAGGAAGAGGTTCAGGAGGAGGGAGAGGAAGTTTGAAA	TGCAGATGAAGAGGGGTATGACTATGAAGATGAGGAAGAGGTTCAGGAGGAAGGAGAGGAAGTTTGAAA	chr3	938897869	1	9.88e-28	Minus	51:G>A	0	-	1	0	2	0	0	0	0	0	0	1	0	0	0	0	0	0	-	0	0	0	0	0	0	0	0	-	0	0	1	0	0	0	0	0	0	0	0	0
D10557	13908780	TGCAGATGGAGTAGCTAACCTTTCAAGTTCTTCCCCACTTAGACCTATTCAAATAAAACAAGAGATGAG	TGCAGATGGAGTAGCTAACCTTTCAAGTTCTTCCCCACTTAGACCTATTCAAATAAAACAAGAGATCTG	chr1S	543951523	1	9.88e-28	Plus	66:G>C	-	-	0	0	0	0	0	0	0	0	0	0	1	0	0	-	0	0	0	-	0	0	0	0	0	0	-	-	0	0	0	0	0	0	0	0	0	0	0	-
D10574	39977277	TGCAGATTGGACATGTGTAGTGACTGCAAGTGTATGCCTAACATTTTACAACAACGCGTGAGATTGAAT	TGCAGATTGGACATGTGTAGTGACTGCAAGTGTATGCCTAACATTTTACAACAACACGTGAGATTGAAT	chr1S	1141296392	1	9.88e-28	Plus	55:G>A	0	0	0	0	0	0	0	0	-	0	0	-	0	0	-	0	0	0	-	-	0	0	-	-	0	0	0	-	0	0	0	0	0	0	0	0	0	0	0	0
D10575	39977277	TGCAGATTGGACATGTGTAGTGACTGCAAGTGTATGCCTAACATTTTACAACAACGCGTGAGATTGAAT	TGCAGATTGGACATGTGTAGTGACTGCAAGTGTATGCCTAACATTTTACAACAACGCATGAGATTGAAT	chr1S	1141296394	1	9.88e-28	Plus	57:G>A	0	0	0	0	0	0	0	0	-	0	0	-	0	0	-	0	0	0	-	-	0	0	-	-	0	0	0	-	0	0	0	0	0	0	0	0	0	0	0	0
D10603	13908804	TGCAGCAACAGAAAGAGTTGAAAGAAAAAAAATATCAACACAACTATTTGGTAATCACATTGCATATCT	TGCAGCAACAGAAAGAGTTGGAAGAAAAAAAATATCAACACAACTATTTGGTAATCACATTGCATATCT	chr5	947537678	1	9.88e-28	Plus	20:A>G	0	0	-	0	0	0	0	0	0	0	0	0	0	0	0	0	0	0	-	0	0	-	0	-	0	0	-	-	0	0	0	0	-	1	0	0	0	0	-	0
D10636	3518931	TGCAGCACATAAAGCAACAATATACAAGTCATATTACAATCACCCTCAGATGATGAGAAACAGCCTTTG	TGCAGCACATAAAGCAACAATATACAAGTCATATTACAATCACCCTCAGATGATGAAAAACAGCCTTTG	chr3	560827680	1	9.88e-28	Plus	56:G>A	0	0	0	0	0	0	0	0	1	-	0	0	0	0	0	-	0	0	2	0	0	-	0	-	0	0	-	-	0	0	0	0	-	0	-	0	0	0	0	-
D10673	39973123	TGCAGCATACCTCTTCACTCTTTGCGGAGTGTCATTTGGGAAACCACAGACATAGAACTGAATAAAAAA	TGCAGCATACCTCTTCACTCTTGGCGGAGTGTCATTTGGGAAACCACAGACATAGAACTGAATAAAAAA	chr5	1106666614	1	9.88e-28	Minus	22:T>G	0	0	0	0	0	0	0	0	0	0	0	0	0	0	0	0	0	-	0	0	0	0	0	0	0	0	0	0	0	0	0	0	0	0	0	0	0	0	0	-
D10711	13864974	TGCAGCCCTCCAGCAAAAGAAAAACATATCAGAAACTACAAACCACTAGAAGATAAACATTTACAGATC	TGCAGTCCTCCAGCAAAAGAAAAACATATCAGAAACTACAAACCACTAGAAGATAAACATTTACAGATC	chr3	36471219	1	1.88e-24	Minus	5:C>T	-	0	0	0	0	0	-	-	-	0	-	0	2	0	2	0	0	0	0	0	-	0	0	-	0	0	0	-	0	0	0	0	0	0	-	0	0	0	0	-
D10748	39980880	TGCAGCTAAGTTGCATCCTTTTTATGCTAATATTTTGACTTTTCCAGAACTTATAAATAGTTTACAGAT	TGCAGCTAAGTTGCATCCTTTTTATGCTAATATTTTGACTTTTCTAGAACTTATAAATAGTTTACAGAT	chr2	528046766	1	5.37e-25	Plus	44:C>T	0	0	0	0	0	2	0	0	0	0	0	0	0	0	0	0	0	0	0	1	0	0	0	0	0	0	0	0	0	0	0	0	0	0	0	0	1	0	-	-
D10750	3513276	TGCAGCTACAGCAAACTTACTTGGGTCCTGCATTGAACAAAATAAATGTATAAGAAATGTGAGAATGTT	TGCAGCTACAGCAAACTTACTTGGGTCCTGCATTGAACAAAATAAATGTACAAGAAATGTGAGAATGTT	chr2	1190114682	1	9.88e-28	Plus	50:T>C	0	0	0	-	0	0	2	-	0	0	0	0	0	0	0	0	0	0	0	0	0	0	0	0	0	0	0	0	0	0	0	0	0	-	2	-	0	-	0	0
D10751	3513276	TGCAGCTACAGCAAACTTACTTGGGTCCTGCATTGAACAAAATAAATGTATAAGAAATGTGAGAATGTT	TGCAGCTACAGCAAACTTACTTGGGTCCTGCATTGAACAAAATAAATGTATAAGAAATGTGAGAATGCT	chr2	1190114699	1	9.88e-28	Plus	67:T>C	0	0	0	-	0	0	0	1	0	0	0	0	0	0	0	0	0	0	0	0	0	0	0	0	0	0	0	0	0	2	0	0	0	-	0	-	0	-	0	0
D10752	3513276	TGCAGCTACAGCAAACTTACTTGGGTCCTGCATTGAACAAAATAAATGTATAAGAAATGTGAGAATGTT	TGCAGCTACAGCAAACTTACTTGGGTCCTGCATTGAACAAAATAAATGTATAAGAAATGTGAGAATGTC	chr2	1190114700	1	9.88e-28	Plus	68:T>C	0	0	0	-	0	0	0	-	0	0	0	0	0	0	0	0	0	0	0	0	0	0	0	0	0	0	0	0	0	0	0	0	0	-	0	-	0	-	0	0
D10755	32609543	TGCAGCTACTACAACAACAACAGAAGATGATAGCAAATGATGGTATAAGAACAGCCTCTTCATCACAGA	TGCAGCTACTACAACAACAACAGAAGATGATGGCAAATGATGGTATAAGAACAGGCTCTTCATCACAGA	chr1S	405075153	1	1.29e-21	Minus	31:A>G	0	0	-	0	0	0	0	0	-	0	0	0	0	0	-	0	0	0	0	0	0	0	-	0	0	-	-	0	0	0	0	0	0	-	-	0	0	0	0	0
D10756	32609543	TGCAGCTACTACAACAACAACAGAAGATGATAGCAAATGATGGTATAAGAACAGCCTCTTCATCACAGA	TGCAGCTACTACAACAACAACAGAAGATGATAGCAAATGATGGTATAAGAACAGGCTCTTCATCACAGA	chr1S	405075130	1	1.29e-21	Minus	54:C>G	0	0	-	0	0	0	2	0	-	0	0	0	0	0	-	0	0	0	0	0	0	0	-	0	0	-	-	0	0	0	0	0	0	-	-	0	0	0	0	0
D10761	3522850	TGCAGCTCCACTTCAAATTCTAACGGAAATATCAGAAGTGGCCGCACTTATTATTCAACAAAGAACGAC	TGCAGCTCCACTTCAAATTCTAACGGAAATATCAGAAGTGGCCGCACTTATTATTCAACGAAGAACGAC	chr1S	217815528	1	4.6e-26	Minus	59:A>G	0	0	0	0	0	0	0	-	0	0	-	0	0	0	0	0	2	0	0	0	0	0	0	0	0	0	1	-	2	0	0	0	0	-	-	0	0	0	0	0
D10785	13910731	TGCAGCTGGAGTTGATGGACCTGTCAAATACACCACAAAATGATTCATTGTAACTAACAACATAGAGAA	TGCAGCTGGAGTTGATGGACCTGTCAAATACACCAGAAAATGATTCATTGTAACTAACAACATAGAGAA	chr5	522750214	1	9.88e-28	Plus	35:C>G	0	0	0	0	0	0	0	0	-	0	0	0	2	-	0	0	0	0	0	0	0	0	0	2	-	0	0	0	0	0	0	0	0	-	0	0	0	1	-	0
D10801	13908952	TGCAGCTTCATCCCGCCCTATTCCTCTTTTGACACACTCCAAGGTTCTTGATTTTTGAAAAGCTTTTTT	TGCAGCTTCATCCCGCCATATCCCTGTTTTGACACACTCCAAGGTTCTTGATTTTTGAAAAGCTTTTTT	chr4	1257488213	1	2.14e-24	Plus	21:T>C	0	0	0	0	0	0	0	0	-	-	0	0	0	0	0	0	0	0	0	0	0	0	0	0	0	0	0	-	0	0	0	0	0	0	0	0	0	0	0	-
D10802	13908952	TGCAGCTTCATCCCGCCCTATTCCTCTTTTGACACACTCCAAGGTTCTTGATTTTTGAAAAGCTTTTTT	TGCAGCTTCATCCCGCCATATTCCTGTTTTGACACACTCCAAGGTTCTTGATATTTGAAAAGCTTTTTT	chr4	1257488244	1	2.14e-24	Plus	52:T>A	0	0	0	0	0	0	0	0	-	-	0	0	0	0	0	0	0	0	0	0	0	0	0	0	0	0	0	-	0	0	0	0	0	0	0	0	0	0	0	-
D10812	18318875	TGCAGCTTGACCAGAATCGATTTTCAAAATGTTTTCCCACACAGATTGGATTGGATCAACAGTTGGTAA	TGCAGCTTGACCAGAATCGATTTTGAAAATGTTTTCCCACACAGATTGGATTGGATCAACAGTTGGTAA	chr3	521125812	1	9.88e-28	Plus	24:C>G	0	-	1	0	1	0	-	0	0	0	-	2	2	0	0	0	2	-	-	0	0	0	0	-	0	0	0	0	0	0	2	0	0	0	0	-	0	0	1	0
D10833	3520838	TGCAGGAAAGTGTATGCCCGAAATGGAATAATTTCTACTCCAACCGGTTATGTACAACTGACACAGGGT	TGCAGGAAAGTGAATGCCCGAAATGGAATAATTTCTACTCCAACCGGTTATGTACAACTGACACAGGGT	chr2	556975375	1	9.88e-28	Plus	12:T>A	2	-	0	0	0	0	0	1	0	-	0	-	-	0	0	0	0	0	0	-	0	-	0	0	0	-	0	0	0	0	-	0	0	0	0	0	0	1	0	0
D10834	3520838	TGCAGGAAAGTGTATGCCCGAAATGGAATAATTTCTACTCCAACCGGTTATGTACAACTGACACAGGGT	TGCAGGAAAGTGTATGCCCGAAATGGAATAATTTCTACTCCAACCCGTTATGTACAACTGACACAGGGT	chr2	556975408	1	9.88e-28	Plus	45:G>C	0	-	0	0	2	0	0	-	0	-	0	1	-	0	0	0	2	0	0	-	0	1	0	0	0	-	0	0	0	0	-	0	0	0	0	0	0	-	2	0
D10835	3520838	TGCAGGAAAGTGTATGCCCGAAATGGAATAATTTCTACTCCAACCGGTTATGTACAACTGACACAGGGT	TGCAGGAAAGTGTATGCCCGAAATGGAATAATTTCTACTCCAACCGGTTATGTACAACTGACACAGGGC	chr2	556975431	1	9.88e-28	Plus	68:T>C	0	-	0	0	0	0	0	-	0	-	0	-	-	0	0	0	0	0	0	-	0	-	0	0	0	-	0	0	0	0	-	0	0	0	0	0	0	-	0	0
D10845	3523259	TGCAGGAACTCATCAAATCCTTCTAGTTGTCATTTGTGCAAGCACAAATATTGGTATCACATATGATTT	TGCAGGAACTCATCAAATCCTTCTAGTTGTCATTTGTGGAAGCACAAATATTGGTATCACATATGATTT	chr1L	511482123	1	9.88e-28	Plus	38:C>G	0	0	0	0	0	0	0	0	0	0	0	0	0	-	0	-	0	0	0	0	0	0	0	0	0	0	-	0	0	0	0	0	0	0	0	0	0	0	-	0
D10871	3521966	TGCAGGACTTTCGATTGAAAGATCTGCCAGACTTTATAAGGGTTACAGATCCAAATGATTCCATGGTAG	TGCAGGCCTTTCGATTGAAAGATCTGCCAGACTTTATAAGGGTTACAGATCCAAATGATTCCATAGTAG	chr1S	903495044	1	9.88e-28	Plus	6:A>C	0	0	0	0	0	0	0	0	0	0	0	2	2	0	2	0	0	0	0	0	0	0	0	0	0	0	0	0	0	0	0	0	2	0	0	0	2	0	0	0
D10872	3521966	TGCAGGACTTTCGATTGAAAGATCTGCCAGACTTTATAAGGGTTACAGATCCAAATGATTCCATAGTAG	TGCAGGACTTTCGATTGAAAGATCTGCCAGACTTTATAAAGGTTACAGATCCAAATGATTCCATGGTAG	chr1S	903495077	1	4.6e-26	Plus	39:G>A	0	0	0	0	0	0	0	0	0	-	0	-	0	-	0	-	0	0	0	0	0	0	0	0	0	0	0	0	0	0	0	0	0	0	-	-	0	0	0	0
D10899	39966329	TGCAGGCAGAAACTGGTGGAGCAAAACCATGTAGCAAACTATTTTCCTGCAAATATTTGATGGGTTTGG	TGCAGGCAGAAACTGGTGGAGCAAAACCATGTAGCGAACTATTTTCCTGCAAATATTTGATGGGTTTGG	chr4	268448857	1	9.88e-28	Plus	35:A>G	-	-	0	0	0	0	0	0	0	-	0	0	0	0	2	-	0	0	-	0	1	0	0	2	0	0	0	0	0	0	2	0	0	0	0	-	0	0	-	0
D10901	3523270	TGCAGGCATATCCTTGAGCCAAGCATCTAGTGGTTTTCCAATGGAGAAAACAATGAAACCAATTTCCCT	TGCAGGCATGTCCTTGAGCCAAGCATCTAGTGGTTTTCCAATGGAGAAAACAATGAAACCAATTTCCCT	chr1L	847181820	1	9.88e-28	Plus	9:A>G	0	-	0	0	0	0	0	0	0	0	0	0	0	0	0	0	0	0	0	0	0	-	0	0	0	-	0	0	0	2	0	1	0	0	0	0	0	0	0	0
D10918	39980114	TGCAGGCGGATTGTACAACCAGATTTCTGGGGAGGAGAATCAGAACTGTTGGTTAGTGATCTTCTTACA	TGCAGGCGGATTGTACAACCAGATTTCTGGGGAGGAGAATCAGAACTGTTGGTTAGTGATCTTTTTACA	chr2	1609559491	1	5.95e-25	Minus	63:C>T	0	0	0	0	0	0	0	0	0	0	0	0	0	0	0	-	0	-	0	0	0	0	0	0	0	0	0	0	0	0	0	1	-	0	-	-	0	0	0	-
D10934	32609594	TGCAGGCTTCACGAGATTTCTGGGAAGATCGCGCCTTGCATTCCGATTCTCAAATGCAATCTCTACACA	TGCAGGCTTCACGAGATTTCTGGGAAGATCGCGCATTGCATTCCGATTCTCAAATGCAATCTCTACACA	chr6	498288055	1	9.88e-28	Plus	34:C>A	0	0	0	0	0	0	0	0	2	0	0	0	0	0	-	0	0	0	0	0	0	0	0	-	0	0	0	0	0	0	0	0	-	0	0	0	0	0	0	0
D10935	32609594	TGCAGGCTTCACGAGATTTCTGGGAAGATCGCGCCTTGCATTCCGATTCTCAAATGCAATCTCTACACA	TGCAGGCTTCACGAGATTTCTGGGAAGATCGCGCCTTGCATTCTGATTCTCAAATGCAATCTCTACACA	chr6	498288064	1	9.88e-28	Plus	43:C>T	0	0	0	0	0	0	0	0	0	0	0	0	2	0	-	0	0	0	0	0	0	0	0	-	0	0	2	0	2	0	0	0	-	0	0	0	0	0	0	0
D10941	39973892	TGCAGGGAAGGATTTGGTTGCTGATAAAGTTACATATCCTAAGCTTTTGGGATTGGAAAAATCAAAGGA	TGCAGGGAAGGATTTGGTTGCTGATAAAGTTACATATCCTAAGCTTTTAGGATTGGAAAAATCAAAGGA	contig_6785	9482	1	9.88e-28	Minus	48:G>A	0	0	0	-	0	0	0	0	0	0	1	0	0	0	0	-	0	2	0	0	0	0	0	0	0	0	0	0	0	0	0	0	0	0	0	0	2	0	0	0
D10950	3527670	TGCAGGGCATACTCTCACAAAGGAAATCTATGATGGAATCCACAAGTGTTTGACAAGTGCGGGGAAATT	TGCAGGGCATACTCTTACAAAGGAAATCTATGATGGAATCCACAAGTGTTTGACAAGTGCGGGGAAATT	chr4	1054651442	1	9.88e-28	Plus	15:C>T	0	0	0	0	0	0	0	0	-	0	0	0	0	0	0	0	0	0	0	0	0	0	0	0	0	-	0	0	0	0	0	0	0	-	0	0	0	-	-	0
D10951	3527670	TGCAGGGCATACTCTCACAAAGGAAATCTATGATGGAATCCACAAGTGTTTGACAAGTGCGGGGAAATT	TGCAGGGCATACTCTCACAAAGGAAATCTATGATGAAATCCACAAGTGTTTGACAAGTGCGGGGAAATT	chr4	1054651462	1	9.88e-28	Plus	35:G>A	0	0	0	0	0	0	0	0	-	0	0	0	0	0	0	0	0	0	0	0	0	0	0	0	0	1	0	0	0	0	0	0	0	-	0	0	0	-	-	0
D10968	39979856	TGCAGGGTATGGATTGGTCCTTTCCCTTACACAACTAGCTTTCAAGAAGGTAGTGAAGAGTGAGAGTTT	TGCAGGGTATGGATTGGTCCTTTCCCTTACACAACTAGCTTTCAAGAAGGTAGTGAAGAGTGAGAGTTA	chr2	284923586	1	9.88e-28	Plus	68:T>A	0	-	0	0	0	0	0	0	0	0	0	0	0	-	0	0	0	0	-	0	-	0	0	0	0	0	0	0	0	0	0	0	0	0	0	0	0	0	0	0
D10972	39981219	TGCAGGGTTGGGATAATCTTTTCAACATCACTCCCCTATTTTAGTTATATGGCTTTTCATTACAGATCG	TGCAGGGTTGGGATAATCTTTTCAACATCACTCCCCTATTTTAGTTATATGGCTTTTCATTAAACATCA	chr5	0	1	6.57e-24	Minus	62:C>A	0	-	0	0	0	0	-	-	0	0	0	0	0	0	0	0	0	0	0	0	0	0	-	-	0	0	0	0	0	0	0	0	-	-	-	0	0	0	0	-
D10973	39981219	TGCAGGGTTGGGATAATCTTTTCAACATCACTCCCCTATTTTAGTTATATGGCTTTTCATTACAGATCG	TGCAGGGTTGGGATAATCTTTTCAACATCACTCCCCTATTTTAGTTATATGGCTTTTCATTAAAGATTC	chr5	0	1	6.57e-24	Minus	67:C>T	0	-	0	0	0	0	-	-	0	0	0	0	0	0	0	0	0	0	0	0	0	0	-	-	0	0	0	0	0	0	0	0	-	-	-	0	0	0	0	-
D10978	39973983	TGCAGGTAAAAAATTGGATGTCACTAGAAAGTACTAAAACAAAAAGTGGTAGACTCGTGATATAGGGAT	TGCAGGTAAAAAATTGGATGTCACTAGAAAGTACTAAAACAAAAAGTGGTAGACTCATGATATAGGGAT	chr4	1410547702	1	4.6e-26	Minus	56:G>A	0	0	0	-	0	0	0	0	0	0	-	0	0	0	0	-	2	0	2	0	2	0	0	0	0	0	0	0	2	0	0	0	0	0	0	0	0	0	0	2
D10989	18318912	TGCAGGTAGCCTGACGAAGCTCAGTTCACTTACATTTCTAACACCAATGTTTGCCTCGATTTTTGGGTA	TGCAGGTAGTCTGACGAAGCTCAGTTCACTTACATTTCTAACACCAATGTTTGCCTCGATTTTTGGGTA	chr2	384079153	1	9.88e-28	Minus	9:C>T	-	-	0	0	0	0	0	0	0	0	0	0	0	0	0	0	0	0	0	0	-	-	0	-	0	-	0	0	0	0	0	0	0	0	0	0	0	0	0	0
D11005	32612120	TGCAGGTCTAATGGGTTGCGGGTTGTTTTTTACAGGTTCAATCGGTTTATGTAGGCCGGGTTCGGATCA	TGCAGGTCTAATGGGTTGCGGGTTGTTTTTTACATGTTCAATCGGTTTATGTAGGCCGGGTTCGGATCA	chr3	439790948	1	9.88e-28	Plus	34:G>T	0	0	0	0	0	0	2	0	0	-	0	0	0	0	-	-	0	0	-	0	1	0	0	0	0	0	0	-	0	0	0	0	0	0	0	-	0	0	0	0
D11023	32609626	TGCAGGTGCACATTTCAAGAAATGGTGTGTGATGCAATCCAAAATAAAGTCAGGGGCAGTCAATGAGGT	TGCAGGTGCACATTTCAAGAAATGGTGTGTGATGCAATCCAAAATAAAGTCAGGGGCAGTCAACGAGGT	chr6	970619749	1	9.88e-28	Plus	63:T>C	0	0	0	0	0	0	0	0	0	0	0	0	0	0	-	0	0	0	0	0	0	0	0	0	0	0	0	0	0	0	0	0	0	0	0	0	0	0	-	-
D11034	13909035	TGCAGGTTACGGGCCATTTTCTTCTACTGCCCCAGCTGAGGAGCAGAGTCCCAAAAACTTACAGATCGG	TGCAGGTTACGGGCCATCTTCTTCTACTGCCCCAGCTGAAGAGCAGAGTCCCAAAAACTTACAGATCGG	chr3	25389310	1	2.29e-23	Plus	17:T>C	0	0	0	0	0	0	0	0	0	0	0	0	0	0	-	0	0	0	-	0	0	0	0	0	0	0	0	0	0	0	-	0	0	-	0	0	0	0	0	0
D11035	39980298	TGCAGGTTATCCAGGAACAATGCGATTTGGAGTGCATTTGGATATTCTTCAAATTTTAGATAGATTACA	TGCAGGTTATCCAGGAACAATGCGATTTGGAGTGCATTTGGATATTCTTCAAATTTTAGATAGATTAAC	chr6	0	1	1.28e-26	Plus	67:C>A	0	0	0	0	0	0	0	-	0	0	1	0	0	0	0	0	0	0	-	0	-	-	0	0	0	0	0	0	0	0	-	0	-	0	0	0	0	2	0	-
D11045	32608567	TGCAGGTTGAGCAGTCACAGGCAGGACTGAAATCACTCTCCTTTTCTGAGAAGACAATAAATCAGCTTC	TGCAGGTTGAGCAGTCACAGGCAGGACTGAAATCACTCTCCTTTTCTGAGAAGACAATAAATCAACTTC	chr2	1514342046	1	9.88e-28	Plus	64:G>A	0	0	0	0	0	0	0	0	0	0	-	0	0	0	0	0	0	0	0	0	0	-	2	0	0	0	0	0	0	0	0	0	0	0	-	-	0	0	0	-
D11089	3523118	TGCAGTACAAGCCCCCGCCTCACAGTTATTCAAAACAAATAACGGAAGTTCTTATCCACTAGGTGAGGC	TGCAGTACAAGCCCCCGCCTCACAGTTATTCAAAACAACTAACGGAAGTTCTTATCCACTAGGTGAGGC	chr1L	622668532	1	9.88e-28	Minus	38:A>C	2	0	-	0	0	0	0	0	0	0	0	0	0	0	0	0	0	0	-	0	0	0	0	0	0	-	0	-	0	0	0	0	0	0	0	0	0	0	-	-
D11102	13909078	TGCAGTAGGTGCCCATATATCCAATAGCTGACTTTGAACAAAAATAATGAGCAAACTTGGTGAATAAGT	TGCAGTAGGTGCCCATATATCCAATAGCTGACTTTGAACAAAAATAATGAGTAAACTTGGTGAATAAGT	chr5	253031208	1	9.88e-28	Plus	51:C>T	0	0	0	0	0	0	0	-	0	0	0	-	0	0	0	0	0	0	-	0	0	0	-	0	0	0	0	0	0	0	-	0	-	0	0	1	2	-	0	-
D11107	18318937	TGCAGTAGTGATCATAGGAGAGGAAACTGTTATTATGATTGTGAGGAGGAGTGTTAGAGTGAGATGAGG	TGCAGTAGTGATCATAGGAGAGGAAACTGTTATTATGATTGTGAGGAAGAGTGTTAGAGTGAGATGAGG	chr6	782092921	1	9.88e-28	Plus	47:G>A	0	0	0	0	0	0	0	0	0	0	0	0	0	0	0	0	-	0	0	0	0	0	0	0	0	0	0	-	0	0	0	-	0	0	0	-	0	0	0	0
D11110	39977879	TGCAGTAGTTGAAACAAGCGGGAAGGTGACTTTCATATAACATAAGTGTTACAGATGCATATACATTAC	TGCAGTAGTTGAAACAAGCGGGAAGGTGACTTTCATATAACATAAGTGTTACAGATGCATATAGATTAC	chr4	1580824959	1	3.55e-27	Minus	63:C>G	0	0	0	0	0	0	0	0	0	-	-	-	0	0	0	0	0	0	0	0	0	-	-	-	0	0	0	0	0	0	0	0	-	0	0	0	0	0	0	0
D11111	3525343	TGCAGTAGTTGCAAAGCCTCTGAAGAGCTTTTGATTTACATCAGCTCCCACACTCTGTCATAGCCATAC	TGCAGTAGTTGCAAAGCCTCTGAAGAGCTTTCGATTTACATCTGCTCCCACACTCTGTCATAGCCATAC	chr5	128264282	1	9.88e-28	Plus	31:T>C	0	0	0	0	0	2	0	0	0	0	-	0	0	-	0	-	0	0	0	0	0	0	0	0	1	0	0	0	-	0	-	0	0	0	0	0	0	0	0	0
D11112	3525343	TGCAGTAGTTGCAAAGCCTCTGAAGAGCTTTTGATTTACATCAGCTCCCACACTCTGTCATAGCCATAC	TGCAGTAGTTGCAAAGCCTCTGAAGAGCTTTTGATTTACATCAGCTCCCACACTCTGTCATAGACATAC	chr5	128264314	1	9.88e-28	Plus	63:C>A	0	0	0	0	0	0	0	0	0	0	1	0	0	-	0	-	0	0	0	0	0	0	0	0	1	0	2	0	1	0	-	0	0	0	0	0	0	0	0	0
D11114	3512586	TGCAGTATAATAGATACATCGAAGTAAGAGGTAAATCACTGAACTGTATGGTGTCGTGTTGTGTGTTAC	TGCAGTATAATAGATACATTGAAGTAAGAGGTAAATCACTGAACTGTATGGTGTCGTGTTGTGTGTTAC	chr2	639965006	1	3.55e-27	Minus	19:C>T	0	0	0	-	0	0	0	0	0	0	0	-	0	0	-	0	0	0	0	-	-	0	-	0	0	0	0	0	0	0	0	0	0	0	0	0	0	-	0	0
D11119	13867598	TGCAGTATAGCAGAATGGGACACATGGCATACGGGGAGCGGGTGAGAATTGATTCAGGAACATAGGGAG	TGCAGTATAGCAGAATGGGACACATGGTATACGGGGAGCGGGTGAGAATTGATTCAGGAACATAGGGAG	chr2	1455063258	1	9.88e-28	Plus	27:C>T	-	0	0	0	1	0	0	0	0	0	0	0	0	0	0	0	0	0	-	0	0	-	0	0	0	0	0	-	0	0	0	0	0	0	0	-	0	0	-	0
D11122	32611066	TGCAGTATATATAGCACAGATCAAGTCAATGAAAGCCTACAAAAGAGAACTCACTTCTAAAGCCTAGCT	TGCAGTATATATAGCACAGATCAAGTCAATGAAAGCTTACAAAAGAGAACTCACTTCTAAAGCCTAGCT	chr1S	231801259	1	4.6e-26	Minus	36:C>T	1	0	0	0	0	0	0	0	0	0	0	0	0	0	0	-	0	0	0	0	0	-	0	0	0	-	0	0	0	0	0	0	-	0	0	0	0	0	-	0
D11123	32611066	TGCAGTATATATAGCACAGATCAAGTCAATGAAAGCCTACAAAAGAGAACTCACTTCTAAAGCCTAGCT	TGCAGTATATATAGCACAGATCAAGTCAATGAAAGCCTACAAAAGAGAACTCATTTCTAAAGCCTAGCT	chr1S	231801242	1	4.6e-26	Minus	53:C>T	-	0	0	0	0	0	0	0	0	0	0	0	0	0	0	-	0	2	0	0	0	-	0	0	0	-	0	0	0	0	2	0	-	0	0	0	0	0	-	0
D11169	3520406	TGCAGTCCACATTTTTATTATAAGCATAACTACCAATAAGGCATGCCATTTTGCACATAAAAGTGCGAA	TGCAGTCCACATTTTTATTATAAGCATAACTACCAATAAGGCATGCCATTTTGCACATAAAAGTGTGAA	chr1L	1586622323	1	9.88e-28	Plus	65:C>T	0	0	0	0	0	0	0	-	0	-	-	0	0	-	0	0	0	-	-	0	0	0	0	0	0	-	0	0	0	-	0	0	0	-	0	0	0	0	0	0
D11184	3523067	TGCAGTCGTTACTGATGTTGCAAAGATTCCTGATGTTTCTATGGAGAGTGAAGATAGCAATTTGGATCG	TGCAGTCGTTACTGATGTTGCAAAGATTCCTAATGTTTCTATGGAGAGTGAAGATAGCAATTTGGATCG	chr2	1337222779	1	9.88e-28	Minus	31:G>A	0	-	0	0	0	0	0	0	0	0	0	0	0	-	0	0	0	0	0	0	0	0	0	0	0	0	0	-	0	0	0	-	0	0	-	0	0	0	0	0
D11186	39974421	TGCAGTCTAAACCTGTAACGAATTTGAATGGTCAATTTTGTCAAATATGTGGTGATACTATTGGATTAC	TGCAGTCTAAACCTGTAACGAATTTGAACGGTCAATTTTGTCAAATATGTGGTGATACTATTGGATTAC	chr2	183923649	1	3.55e-27	Minus	28:T>C	0	0	0	0	0	0	0	0	0	0	0	-	0	0	0	0	0	0	0	0	-	-	0	0	0	0	0	-	0	1	0	0	0	0	0	0	0	0	0	0
D11187	39974421	TGCAGTCTAAACCTGTAACGAATTTGAATGGTCAATTTTGTCAAATATGTGGTGATACTATTGGATTAC	TGCAGTCTAAACCTGTAACGAATTTGAACGGTCAATTTTGTCAAATATGTGGTGATACTATTGGATTAA	chr2	0	1	3.55e-27	Minus	68:C>A	0	0	0	0	0	0	0	0	0	0	0	-	0	0	0	0	0	0	0	0	-	-	0	0	0	0	0	-	0	-	0	0	0	0	0	0	0	0	0	0
D11188	13868545	TGCAGTCTATTCGAGATTCTTATAGCTAACTTAGCATTCATCTCGTTCCTTTATTTAGGTGGATATTTT	TGCAGTCTATTCGAGATTCTTATAGCCAACTTAGCATTCATCTCGTTCCTTTATTTAGGTGGATATTTT	chr1L	1633931091	1	9.88e-28	Plus	26:T>C	0	-	0	0	0	0	0	0	0	0	0	0	0	-	-	0	0	0	0	0	0	0	-	0	0	0	0	-	0	0	1	0	-	-	0	-	0	0	0	0
D11195	39979271	TGCAGTCTTGATAAATATGGAAATGGTCCTCCAAAGGGTGGGAACATAGCTAACACTAAGGATTATGTT	TGCAGTCTTGATAAATATGGAAATGGTCCTCCAAAGGGTGGGAACATATCTAACACTAAGGATTATGTT	chr4	99816494	1	9.88e-28	Plus	48:G>T	0	0	0	0	0	0	0	0	0	0	-	0	0	0	0	-	0	0	0	0	0	0	0	0	0	0	0	-	0	0	0	0	-	1	0	0	0	0	0	-
D11196	32611744	TGCAGTCTTGCAAGCACGTATGGCCCGAATCATGTCCCTAAATATTGGGGATACGAACCAGATAAGTTA	TGCAGTCTTGCAAGCACGTATTGCCCGAATCATGTCCCTAAATATTGGGGATACGAACCAGATAAGTTA	chr1L	731405424	1	9.88e-28	Minus	21:G>T	0	0	0	0	0	0	-	0	0	0	0	0	0	-	0	0	0	0	0	0	0	0	0	0	0	0	0	0	0	0	0	0	-	2	0	0	0	0	0	0
D11208	3528001	TGCAGTGACAAAACTGGGACTCTAACTACCAATATGATGTCAGTTGCAAAGGTAAATTTTGGTCAGACA	TGCAGTGACAAAACTGGGACTCTAACTACCAATATGATGTCAGTTGCAAAGGTAAATTTTGGTCATACA	chr2	1070476401	1	9.88e-28	Plus	65:G>T	-	0	0	-	0	0	0	2	0	1	0	0	2	0	0	-	0	0	-	1	1	-	0	1	0	0	0	-	0	0	0	0	-	-	0	-	0	0	0	0
D11217	39977958	TGCAGTGAGAGCTGCTCATGGCTGGCTTTGCCATAAGCAGGGTGGTTTCTTACCGATATCAGATATGTA	TGCAGTGGGAGCTGCTCATGGCTGGCTTTGCCATAAGCAGGGTGGTTTCTTACCGATATCAGATATGTA	chr2	1265542879	1	9.88e-28	Minus	7:A>G	0	0	0	0	0	0	0	0	0	-	0	0	0	0	0	0	0	0	0	-	0	-	0	0	0	-	0	0	0	0	0	0	0	0	0	0	0	0	0	0
D11227	13904967	TGCAGTGCAAAATAGGTAATACACCATTCAAATACTTGGGACTGCCGATTGGTTGAAACATGAACAGAA	TGCAGTGCAAAATAGGTAATACACCATTCAAATACTTGGGACTGCGGATTGGTTGAAACATGAACAGAA	chr6	1232922529	1	9.88e-28	Plus	45:C>G	0	-	0	0	0	0	0	0	0	0	0	0	2	0	0	-	0	0	0	0	0	-	0	-	0	0	0	0	0	1	0	0	-	0	0	0	0	0	0	0
D11247	3522277	TGCAGTGTAGGATGTCTCCATAAGACCATCAATGAATTCAGTCTCAAAATCTGTAATCAAATTACAGAT	TGCAGTGTAGGATGTCTCCATAAGACCATCAATGAATTCAGTCTCAAAATCTGTAATCAAATTAAGGAT	chr6	0	1	5.37e-25	Minus	64:C>A	0	-	0	0	0	0	-	-	0	0	0	0	0	0	0	-	0	0	0	0	0	0	0	0	0	0	0	0	0	0	0	0	0	0	0	0	0	0	-	0
D11252	3522301	TGCAGTGTCCTGTTTATCATACCTCACTCCAACGCCAAGCGTTGCTGAAAACTACAACAATCTCCCAAC	TGCAGTGTCCTGTTTATCATACCTCACTCCAACGCCAAGCGTTGCTGAAAACTACAACAATCTCGCAAC	chr2	1352586926	1	9.88e-28	Minus	64:C>G	0	0	-	0	0	0	0	0	-	0	0	0	-	0	0	0	0	0	0	-	0	0	0	0	0	0	0	0	0	0	1	0	0	0	0	0	0	0	0	0
D11270	39979317	TGCAGTTATCGAATCGAACGGTGTTGCATTGTGAAGGTAGTATCAGACGACCTGCAAAATCTCCTATAA	TGCAGTTATCGAATTGAACGGTGTTGCATTGTGAAGGTAGTATCAGACGACCTGCAAAATCTCCTATAA	chr3	457393240	1	9.88e-28	Plus	14:C>T	0	1	0	0	-	0	0	0	0	0	-	0	0	-	-	0	0	0	0	-	0	-	0	0	1	-	2	0	0	0	-	0	0	-	0	0	2	0	0	-
D11279	32609702	TGCAGTTATTGTTCGTGGGCTCCCATCTTCTGCATCCTGGCAAGACTTGAAGGTATCGAAATGTTCACA	TGCAGTTATCGTTCGTGGGCTCCCATCTTCTGCATCCTGGCAAGACTTGAAGGTATCGAAATGTTCACA	chr2	833776010	1	9.88e-28	Minus	9:T>C	0	-	0	0	0	0	0	0	1	0	0	0	0	0	0	0	0	0	0	0	0	0	0	0	0	0	-	0	0	0	0	0	0	0	0	0	-	0	2	-
D11280	32609702	TGCAGTTATTGTTCGTGGGCTCCCATCTTCTGCATCCTGGCAAGACTTGAAGGTATCGAAATGTTCACA	TGCAGTTATTGTTCGTGGGCTCCCATCTTCTGCATCCTGGCAAGACTTGAAGGTATTGAAATGTTCACA	chr2	833775963	1	9.88e-28	Minus	56:C>T	0	-	0	0	0	0	0	0	-	0	0	0	0	0	0	0	0	0	0	0	0	0	0	0	0	0	-	0	0	0	0	0	0	0	0	0	1	0	0	-
D11281	3527826	TGCAGTTCAAGCAGCCAAGTATAAATGTGGTTTCGAGCCAGAAAGGGAACAATGTGAAAAATACAAGTG	TGCAGTTCAAGCAGCTAAGTATAAATGTGGTTTCGAGCCAGAAAGGGAACAATGTGAAAAATAGAAGTG	chr4	1489855838	1	9.88e-28	Plus	15:C>T	0	-	0	0	0	0	0	0	0	0	0	0	0	0	0	0	0	0	0	-	0	0	0	-	0	0	0	0	0	-	0	0	-	0	-	0	0	0	0	-
D11282	13909169	TGCAGTTCAATTCTTTCGAAAGCTCTCGTTTAGCTTCTCAGTAAATTCCAACAGCCTTACAACTTTTAC	TGCAGTTCAATTCTTTCGAAAGCTCTCGTTTAGTTTCTCAGTAAATTCCAACAGCCTTACAACTTTTAC	chr3	317585470	1	3.55e-27	Minus	33:C>T	0	0	0	0	0	0	0	0	0	-	0	-	0	0	0	0	0	0	0	0	0	0	0	0	0	0	0	-	0	0	0	0	0	0	0	0	-	0	-	-
D11309	3526998	TGCAGTTGCGTAGAAAATTTACACGATTGAACTATCAAACTTCTCTTCACAATTTATACATTGAATCCA	TGCAGTTGCGTAGAAATTTTACACGATTGAACCATCAAACTTCTCTTCACAATTTATACATTGAATCCA	chr5	61180685	1	9.88e-28	Plus	16:A>T	0	0	-	0	0	0	-	0	-	0	-	0	0	0	0	0	0	0	-	0	0	0	0	0	0	0	0	-	0	0	0	0	-	0	-	0	0	0	0	0
D11311	22856963	TGCAGTTGCTTCTGTGTTTGAAATCCTTGATAGACAATCACTTATTCCAAAGGTATGTAATGTATCTAA	TGCAGTTGCTTCTGTGTTTGAAATCCTTGATAGACAATCACTTATTCCAAAGGTATGTAATGTCTCTAA	contig_7543	465565	1	9.88e-28	Minus	63:A>C	0	0	-	0	0	0	0	0	0	-	0	-	2	0	0	0	0	2	0	0	2	0	0	-	0	0	0	0	0	0	0	0	0	-	0	0	0	0	0	0
D11313	3523209	TGCAGTTGGATTTCATGTGAAAGAAATTGGATATTTGCACATCTTTATTTTGAGGGTGGACATGTGAAT	TGCAGTTGGATTTCATGTCAAAGAAATTGGATATTTGCACATCTTTATTTTGAGGGTGGACATGTGAAT	chr3	1030968149	1	9.88e-28	Minus	18:G>C	0	2	-	-	0	0	0	0	0	0	0	0	-	0	0	0	0	0	-	0	0	0	-	0	2	0	0	0	0	0	0	0	0	0	0	-	0	0	0	0
D11317	13905038	TGCAGTTGTAGAAGATCCAAATCCGCTTGGGCCGGACATTCCGGTAACCAATGAGAAAATACCCACCAT	TGCAGTTGTAGAGGATCCAAATCCGCTTGGGCCGGACATTCCGGTAACCAATGAGAAAATACCCACCAT	chr3	338872874	1	9.88e-28	Minus	12:A>G	0	0	1	-	0	0	0	0	0	0	2	0	0	0	2	-	2	0	0	0	0	0	0	0	0	2	0	0	0	-	-	-	0	0	2	0	0	0	0	0
D11318	13905038	TGCAGTTGTAGAAGATCCAAATCCGCTTGGGCCGGACATTCCAGTAACCAATGAGAAAATACCCACCAT	TGCAGTTGTAGAAGATCCAAATCCGCTTGGGCCGGACATTCCGGTAACCAATGAGAAAATACCCACCAT	chr3	338872844	1	4.6e-26	Minus	42:A>G	1	1	-	-	1	1	1	1	1	1	1	1	1	2	1	-	1	1	1	1	1	1	1	1	1	1	1	1	1	-	-	-	1	1	1	1	1	1	2	1
D11340	3532379	TGCAGTTTGCCAAAGGAATAGAGTCCATCCTTTCCAAGAGATCTTTGTAGTAATACTTCAGATGTAGCC	TGCAGTTTGCCAAAGGAATAGAATCCATCCTTTCCAAGAGATCTTTGTAGTAATACTTCAGATGTAGCC	contig_8274	138159	1	9.88e-28	Plus	22:G>A	2	2	0	0	0	0	0	0	0	-	-	0	0	-	0	0	0	0	-	0	0	0	-	0	0	0	-	-	0	0	-	0	0	-	0	-	0	0	0	0
D11344	39968067	TGCAGTTTGTTGCCTCATTTTATCAGCATATGGTTGTTCAAAGACGGGTATGTTTCCTTGGCCCTTGCT	TGCAGTTTGTTGCCTCATTTTATCAGCATATGGTTGTTCAAATACGGGTATGTTTCCTTGGCCCTTGCT	chr1S	984593871	1	9.88e-28	Plus	42:G>T	0	0	0	0	0	0	0	0	0	0	0	-	0	0	0	0	0	0	0	0	0	0	0	0	0	0	0	0	0	0	0	0	0	-	0	0	0	0	0	0
D11347	3515419	TGCAGTTTTTGAAGCTGCTTGGTTTACAGCAGATGATGCCTTTCTGATGATACCAGAGAAAGGAAAGCC	TGCAGTTTTTGAAGCTGCTTGGTTTACAGCAGATGATGCCTTTTTGATGATACCAGAGAAAGGAAAGCC	chr6	340569763	1	9.88e-28	Plus	43:C>T	2	0	1	0	0	0	0	0	0	0	0	0	0	-	0	0	0	-	-	0	-	0	0	0	0	0	0	-	0	0	0	0	0	0	1	-	0	0	0	0
D11364	3521885	TGCAGAAACTTTAGTTATTATTTGTGCGAAAGAATGGCAACAAATTGGGAAGAGAAATTATGAAGAGAA	TGCAGAAACTTTAGTTATTATTTGTGCGAAAGAATGGCAACAAATTGGGAAGAGAAACTATGAAGAGAA	chr2	11487272	1	4.6e-26	Minus	57:T>C	1	1	2	1	1	-	1	1	-	1	1	1	1	1	1	1	1	1	1	1	1	1	1	1	2	-	1	1	1	1	1	1	1	-	2	1	1	1	1	0
D11369	3512535	TGCAGAAGAAGAGCAAAGTCCTGCAATATTACAGGTCAGAAGCACACTTCAAGCCCAAAGGGATCTTGA	TGCAGAAGAAGAGCAAAGTCCTGCAATATTACAGGTCAGAAGCACACTTCAAGTCCAAAGGGATCTTGA	chr1S	1183593766	1	9.88e-28	Minus	53:C>T	0	0	0	0	0	0	0	0	0	0	0	0	0	0	0	-	0	0	0	0	0	0	0	0	0	0	0	0	0	0	0	0	0	0	0	0	2	0	0	0
D11377	3521374	TGCAGAAGCTGCTTCTACTTTTGTTCCCTGTGTGGCTTAGAAAAGTTTACAATGATGTTGCCTATGGGA	TGCAGAAGCTGCTTCTACTTTTGTTCCCTGTGCGGCTTAGAAAAGTTTACAATGATGTTGCCCATGGGA	chr3	357772024	1	4.6e-26	Minus	32:T>C	0	0	0	-	0	-	0	-	0	0	-	0	0	0	0	-	0	0	0	-	0	0	0	0	0	-	0	-	0	0	0	0	0	0	0	-	0	0	-	0
D11379	13899829	TGCAGAAGTAAAATAAGTCATAAAAAAATATTTTTGGTTGAAAAGAAAGTGAAGCTGGAGAAGAAATTA	TGCAGAAGTAAAATAAGTCATAAAAAAATATTTTTGGTTGAAAAGAAAGTGAAGCTGAAGAAGAAATTA	chr6	1156433225	1	9.88e-28	Plus	57:G>A	0	0	-	0	0	0	0	0	-	-	-	-	0	0	0	0	0	0	0	-	0	-	0	0	0	0	0	0	0	0	-	0	0	0	0	-	0	0	0	0
D11442	13866440	TGCAGATTCTCCATTTACCTTCCCTATTCAATCACCAGTGAGCCAGGTTTCACCTGCTCCTTCTCCATC	TGCAGATTCTCCACTTACCTTCCCTATTCAATCACCAGTGAGCCAGGTTTCACCTGCTCCTTCTCCATT	chr1L	1363603873	1	1.65e-25	Plus	13:T>C	0	-	0	0	0	1	-	-	-	0	0	0	0	-	0	0	2	-	-	0	0	-	0	2	0	0	-	2	0	0	0	0	0	0	0	0	0	0	0	0
D11444	13866440	TGCAGATTCTCCATTTACCTTCCCTATTCAATCACCAGTGAGCCAGGTTTCACCTGCTCCTTCTCCATC	TGCAGATTCTCCATTTACCTTCCCTATTCAATCACCAGTGAGCCAGGTTTCACGTGCTCCTTCTCCATC	chr1L	1363603913	1	1.65e-25	Plus	53:C>G	0	-	0	0	0	-	-	-	-	0	0	0	0	-	0	0	0	-	-	0	0	-	0	0	0	0	-	0	0	0	0	0	0	0	0	0	0	0	0	0
D11445	32608315	TGCAGATTGTGCTGGAGCTTTATTTTATGCAATGATGAAGTATGCTGTAGAAATGCCCCATAGTTCAGC	TGCAGATTGTGCTGGAGCTTTATTTTATGCAATGATGAAGTATGCTGTAGAAATGGCCCATAGTTCAGC	chr1S	820042000	1	9.88e-28	Minus	55:C>G	0	0	0	0	0	0	-	0	0	0	0	0	0	0	0	0	0	0	0	0	-	0	0	0	0	0	0	0	0	0	0	0	-	0	0	0	0	0	0	0
D11446	32608315	TGCAGATTGTGCTGGAGCTTTATTTTATGCAATGATGAAGTATGCTGTAGAAATGCCCCATAGTTCAGC	TGCAGATTGTGCTGGAGCTTTATTTTATGCAATGATGAAGTATGCTGTAGAAATGCCCCATAGTTCAGT	chr1S	820041987	1	9.88e-28	Minus	68:C>T	0	0	0	0	0	0	-	0	0	0	0	0	0	0	0	0	0	0	0	0	-	0	0	0	0	0	0	0	0	0	0	0	-	0	0	0	0	0	0	0
D11469	39973066	TGCAGCAGCAATTCTCAGGAGTTCATTCATATCTCTAGATACTAAGTTTTGCACTCCATCAGATGGCAG	TGCAGCAGCAATTCTCAGGAGTCCATTCATATCTCTAGATACTAAGTTTTGCACTCCATCAGATGGCAG	chr3	865125551	1	9.88e-28	Plus	22:T>C	0	0	0	0	0	-	0	0	0	0	0	0	0	-	-	0	0	0	0	0	0	0	0	-	0	0	0	-	0	0	0	0	0	0	0	0	0	0	0	0
D11483	13908876	TGCAGCCATTGTGCATATGATGGACAAGGTCATATTCAAATCCAATCAAAATCAATATTTTGACTTGTT	TGCAGTCATTGTGCATATGATGGACAAGGTCATATTCAAATCCAATCAAAATCAATATTTTGACTTGTT	chr1L	1221247241	1	9.88e-28	Plus	5:C>T	0	0	0	0	0	0	0	0	0	0	-	0	0	-	-	0	0	0	-	0	0	0	0	0	0	0	0	0	0	0	0	-	-	-	0	0	0	0	0	0
D11484	13908876	TGCAGCCATTGTGCATATGATGGACAAGGTCATATTCAAATCCAATCAAAATCAATATTTTGACTTGTT	TGCAGCCATTGTGCATATGATGGACAAGGTCATATTCAAATCCAATCAAAATCTATATTTTGACTTGTT	chr1L	1221247289	1	9.88e-28	Plus	53:A>T	0	0	0	0	0	0	0	0	2	0	-	0	0	-	-	0	0	0	-	0	0	0	0	0	0	0	0	0	0	0	0	-	-	-	0	0	0	0	0	0
D11542	3525143	TGCAGGTAGTGAAGGTTGATGGACGCACAATTGGCGATGGAAAAGTAGGGCCAGTAACAAAAAAATTGC	TGCAGGTAGTGAAGGTTGATGGACGCACAATTGGCGATGGAAAAGTAGGGCCAGTAACTAAAAAATTGC	chr3	526654086	1	9.88e-28	Minus	58:A>T	2	0	0	0	0	0	0	0	0	0	0	2	-	-	0	0	0	0	0	0	0	2	-	0	0	0	-	0	0	0	0	0	-	0	2	-	0	0	0	1
D11551	18318921	TGCAGGTTAGGTTGAGTGGGCTTTTACATTGTGATGACATCTCTGCATTCAAGGTTCTCATACTAATTC	TGCAGGTTAGGTTGAGTGGGCTTTTACATTGTGATGACATCTCTGCATTCAAGGTTCTCATACTAATCC	chr3	0	1	1.28e-26	Plus	67:T>C	0	-	0	0	0	0	0	-	0	0	0	0	0	-	-	-	0	-	-	0	0	0	0	0	0	0	0	1	0	0	-	0	0	0	0	0	0	0	0	0
D11591	39977982	TGCAGTGCTGTACCAGTTTCTATGCTCGGATGCACAATTGCATTTTCTCTGTTGGCAGAACTTTCACCT	TGCAGTGCTGTACCAGTTTTTATGCTCGGATGCACAATTGCATTTTCTCTGTTGGCAGAACTTTCACCT	chr3	278712068	1	9.88e-28	Minus	19:C>T	0	-	0	0	0	0	0	0	-	-	0	0	0	0	0	0	0	0	0	0	0	0	0	0	0	0	0	0	0	0	1	0	0	0	-	0	0	-	0	-
D11613	3523999	TGCAGTTGACTGTTGCTCAAAACAGCCTATCCTGATAATTTAGCTTTGGTTTTGTTGCAACTAATATCT	TGCAGTTGACTGTTGCTCAAAACAGCCTATCGTGATAATTTAGCTTTGGTTTTGTTGCAACTAATATCT	chr1L	941792801	1	9.88e-28	Plus	31:C>G	0	0	0	-	0	0	0	0	-	0	0	0	0	-	1	0	0	0	-	0	-	0	0	-	0	0	0	0	0	0	0	0	-	-	2	0	0	0	0	0
D11623	13866788	TGCAGTTTTCTATTCCCAGAATCAGCTGAAAATAACACAGCTCTTGAAATATTGACAATTGAGAAAGTT	TGCAGTTTTCTATTCCCAGAATCAGCTGAAAGTAACACAGCTCTTGAAATATTGACAATTGAGAAAGTT	chr2	1224611664	1	9.88e-28	Plus	31:A>G	0	0	0	0	0	0	0	0	0	0	0	0	0	-	0	0	0	2	0	1	0	0	0	-	0	1	0	0	0	0	-	0	0	-	-	0	-	0	-	-
D11682	3523037	TGCAGGTATAGAGAATGTAAGAAAACGGTGAAGCAGATTTGAGTATTATTAGTTGTCAAAATCCCACAT	TGCAGGTATAGAGAATGTAAGAAAACGGTGAAGCAGATTTGAGTATTATTAGTTGTCAAAATGCCACAT	chr2	8244159	1	9.88e-28	Minus	62:C>G	0	-	0	0	0	-	0	0	-	0	-	0	0	-	0	0	0	0	0	0	0	0	0	-	0	0	0	0	-	0	-	0	0	0	0	0	0	0	0	0
D11839	13912377	TGCAGAAGAAAACCTGAATATTTATAACACCATTTCCACACACAAAAATGCTTACAGATCGGAAGAGCG	TGCAGAAGAAAACCTGAATATTTATAACACAATTTCCACACACAAAAATGCTTACAGATCGGAAGAGCG	chr1L	438691804	1	1.42e-19	Minus	30:C>A	0	-	2	0	2	0	0	0	0	0	0	1	0	-	-	0	0	0	0	0	0	0	0	0	0	0	0	-	0	0	1	0	0	0	0	0	0	0	0	-
D11853	3528699	TGCAGAATAAAACAAAGTAACTTTCACTGTACAATTTTACAGATCGGAAGAGCGGTTCAGCAGGAATGC	TGCAGAACAAAACAAAGTAACTTTCACTGTACAATTTTACAGATCGGAAGAGCGGTTCAGCAGGAATGC	chr6	872734099	1	1.49e-11	Minus	7:T>C	0	-	-	0	2	0	0	0	0	0	-	-	2	0	0	-	0	0	0	0	-	-	0	-	1	1	0	-	0	0	0	0	-	0	-	0	2	0	0	0
D11854	3528699	TGCAGAATAAAACAAAGTAACTTTCACTGTACAATTTTACAGATCGGAAGAGCGGTTCAGCAGGAATGC	TGCAGAATAAAACAAAGTAACTTTCACTGTACAACTTTACAGATCGGAAGAGCGGTTCAGCAGGAATGC	chr6	872734072	1	1.49e-11	Minus	34:T>C	0	-	-	0	0	0	0	0	0	0	-	-	0	0	0	-	2	0	0	2	1	-	0	-	-	-	2	-	0	0	0	0	-	0	-	0	0	0	0	0
D11857	100194718	TGCAGAATCGGATTCGCGGTGGTGCTGATGAAGAGAAGTGATTGAATAGTTTACAGATCGGAAGAGCGG	TGCAGAATCGGATTCGCGGTGGCGCTGATGAAGAGAAGTGATTGAATAGTTTACAGATCGGAAGAGCGG	chr5	1283508859	1	2.29e-17	Minus	22:T>C	1	1	1	1	1	1	1	-	1	1	1	1	1	1	1	1	1	1	1	1	-	1	1	1	1	1	1	1	1	1	1	1	1	1	1	1	1	1	1	1
D11866	39968469	TGCAGACAGCATAAATACAGTTGGGATTTCACACCGGCGTCACAATTGGTTTACAGATCGGAAGAGCGG	TGCAGACAGCATAAATACAGTTGGGATTTCACGCCGGCGTCACAATTGGTTTACAGATCGGAAGAGCGG	chr1S	59138194	1	4.91e-19	Plus	32:A>G	0	0	0	0	0	0	-	0	0	0	0	0	0	-	-	-	0	0	0	-	0	0	0	0	0	0	0	0	0	2	0	0	0	0	0	0	0	0	0	0
D11867	39968469	TGCAGACAGCATAAATACAGTTGGGATTTCACACCGGCGTCACAATTGGTTTACAGATCGGAAGAGCGG	TGCAGACAGCATAAATACAGTTGGGATTTCACACCCGCGTCACAATTGGTTTACAGATCGGAAGAGCGG	chr1S	59138197	1	4.91e-19	Plus	35:G>C	0	0	0	0	0	0	-	0	0	0	0	0	0	-	-	-	0	0	0	1	0	0	0	0	0	0	0	0	0	0	0	0	0	0	2	0	0	2	0	0
D11868	39968469	TGCAGACAGCATAAATACAGTTGGGATTTCACACCGGCGTCACAATTGGTTTACAGATCGGAAGAGCGG	TGCAGACAGCATAAATACAGTTGGGATTTCACACCGGCGTCACAATTCGTTTACAGATCGGAAGAGCGG	chr1S	59138209	1	4.91e-19	Plus	47:G>C	0	0	0	0	0	0	-	0	0	0	0	0	0	-	-	1	0	0	0	-	0	0	2	0	0	0	0	0	0	0	0	0	0	0	0	0	0	0	0	2
D11875	39975412	TGCAGACTGGGAGTAATGCTAGAGCAGTTGGAAGTAATAATGTTACAGATCGGAAGAGCGGTTCAGCAG	TGCAGACTGGGAGTAATGCTGGAGCAGTCGGAAGTAATAATGTTACAGATCGGAAGAGCGGTTCAGCAG	chr1S	1479489644	1	1.01e-14	Minus	20:A>G	0	0	0	0	0	0	-	0	0	0	0	-	0	0	0	-	0	0	0	0	0	0	0	0	0	-	-	0	0	0	0	0	-	0	0	-	0	0	0	-
D11894	13909575	TGCAGAGAGTGGACACCACACAAAATATATAAAAGAGAAAAATATATTACAGATCGGAAGAGCGGTTCA	TGCAGAGGGTGGACACCACACAAAATATATAAAAGAGAAAAATATATTACAGATCGGAAGAGCGGTTCA	chr3	1534883152	1	3.38e-15	Plus	7:A>G	1	-	1	1	1	1	1	0	1	2	1	1	1	1	1	1	1	1	1	1	-	1	1	1	1	1	1	1	1	1	1	1	-	1	1	1	1	2	1	0
D11913	13912409	TGCAGATATTGTGGGTAGGTGTTAGTGTTTTTGCGTTTTACAGATCGGAAGAGCGGTTCAGCAGGAATG	TGCAGATATTGTGGGTAGGTGTTAGTATTTTTGTGTTTTACAGATCGGAAGAGCGGTTCAGCAGGAATG	chr1L	151197468	1	4.46e-12	Plus	26:G>A	0	-	0	0	0	0	0	0	-	0	0	0	0	0	0	-	0	-	0	0	0	0	0	0	0	-	0	-	0	0	0	0	-	0	0	0	0	0	0	-
D11914	3521423	TGCAGATATTTATCTTTACTGACACCTGGGTCCAATTTTTTACAGATCGGAAGAGCGGTTCAGCAGGAA	TGCAGATATTTATCTTTACTGACAGCTGGGTCCAATTTTTTACAGATCGGAAGAGCGGTTCAGCAGGAA	chr1S	105810247	1	3.94e-13	Plus	24:C>G	0	0	2	0	2	0	-	0	0	0	0	0	0	0	0	2	0	0	0	0	0	-	2	0	0	0	0	0	0	0	0	0	0	0	-	-	0	0	-	0
D11915	3521423	TGCAGATATTTATCTTTACTGACACCTGGGTCCAATTTTTTACAGATCGGAAGAGCGGTTCAGCAGGAA	TGCAGATATTTATCTTTACTGACACCTGAGTCCAATTTTTTACAGATCGGAAGAGCGGTTCAGCAGGAA	chr1S	105810251	1	3.94e-13	Plus	28:G>A	0	0	0	0	0	0	-	0	0	0	0	0	0	0	0	0	0	0	0	0	0	-	0	0	0	0	0	0	0	0	0	0	0	0	-	-	0	0	-	0
D11929	3519612	TGCAGATTCATCATCCAACAACCAAACAACCCATCAGCATATAAAAATTGCAACTGATTACAGATCGGA	TGCAGATTTATCATCCAACAACCAAACAACCCATCAGCATATAAAAATTGCAACTGATTACAGATCGGA	contig_5838	248336	1	3.73e-21	Plus	8:C>T	0	0	0	0	0	0	0	-	0	0	-	0	0	0	0	0	0	0	0	0	-	-	-	-	0	0	0	0	0	0	0	0	0	0	0	0	0	0	0	0
D11940	39968933	TGCAGCAAGAGCAAATCTCTGGAAATATGAAGAGAATTCAAGCAATAAATTTACAGATCGGAAGAGCGG	TGCAGCAAGAGCGAATCTCCGGAAATATGAAGAGAATTCAAGCAATAAATTTACAGATCGGAAGAGCGG	chr5	344776252	1	4.91e-19	Plus	12:A>G	0	0	0	0	0	0	0	0	0	0	0	0	0	0	0	-	0	0	0	0	0	-	-	0	0	0	-	0	0	0	0	-	0	0	0	-	0	0	0	0
D11948	18320605	TGCAGCACAATTTTGTTTTTACTATTGATCTGGTTGATACGATTTTACAGATCGGAAGAGCGGTTCAGC	TGCAGCACAATTTTGTTTTTACTATTGATCCAGTTGATACGATTTTACAGATCGGAAGAGCGGTTCAGC	chr5	368506941	1	8.59e-16	Plus	30:T>C	0	0	0	0	0	0	0	0	0	0	0	0	0	0	0	-	0	0	0	0	-	0	-	0	0	0	0	-	0	0	0	0	0	0	-	-	0	0	0	-
D11979	3509138	TGCAGCCATGTTAGGGTATGCATCCCAAAACTTTATCTTTCAAGTTTCATGATATTACAGATCGGAAGA	TGCAGCCATGTTAGGGTATACATCCCAAAACTTTATCTTTCAAGTTTCATTATATTACAGATCGGAAGA	chr4	705885355	1	3.39e-21	Minus	50:G>T	0	-	-	-	0	0	0	-	0	0	0	0	0	0	0	0	0	0	0	0	0	0	0	0	0	0	0	0	0	0	0	0	0	0	0	-	0	-	0	-
D11986	13909674	TGCAGCGGTCGGTGATCGTGGAGTTGTTTTTACAGATCGGAAGAGCGGTTCAGCAGGAATGCCGAGACC	TGCAGCGGTCGGTGATCGGGGAGTTGTTTTTACAGATCGGAAGAGCGGTTCAGCAGGAATGCCGAGACC	chr1L	1375646142	1	6.24e-08	Plus	18:T>G	0	-	0	0	0	2	0	1	0	1	-	0	-	2	0	-	0	1	-	2	0	0	0	0	2	0	0	-	0	0	0	0	0	0	0	-	0	0	0	1
D11987	39975829	TGCAGCCGTTGTTGGATGATGAAATCGATGAAATCATTACAGATCGGAAGAGCGGTTCAGCAGGAATGC	TGCAGCCGCTGTTGGATGATGAAATCGATGAAATCATTACAGATCGGAAGAGCGGTTCAGCAGGAATGC	chr3	869776008	1	1.49e-11	Minus	8:T>C	0	0	2	0	0	0	0	0	0	0	0	0	2	0	0	0	0	0	-	0	0	0	0	2	0	0	0	0	0	0	-	0	0	0	0	0	0	2	-	0
D11988	39975829	TGCAGCCGTTGTTGGATGATGAAATCGATGAAATCATTACAGATCGGAAGAGCGGTTCAGCAGGAATGC	TGCAGCCGTTGTTGGATGATGAAATCGATGAAATCTTTACAGATCGGAAGAGCGGTTCAGCAGGAATGC	chr3	869775981	1	1.49e-11	Minus	35:A>T	0	2	0	0	0	2	0	0	0	0	0	0	0	0	0	0	0	2	-	0	0	0	0	0	2	0	0	0	0	0	-	0	0	0	0	0	0	0	-	0
D11998	3508889	TGCAGCTAAAACCGATGGAGACAAACCAAGCGCCTCTGAAATTGCAACATAATTACAGATCGGAAGAGC	TGCAGCTAAAACCGATGGAGACAAACCAAGCGCCTCTGAGATTGCAACATAATTACAGATCGGAAGAGC	chr1S	728790046	1	4.09e-20	Minus	39:A>G	0	-	-	-	0	0	0	0	-	0	-	0	0	-	0	0	0	0	0	0	0	0	0	0	0	0	-	-	0	0	0	0	0	-	0	0	0	0	0	-
D12003	13906255	TGCAGCTATAATAACCTACAGAAAAAGGAAAAGCATTACAGATCGGAAGAGCGGTTCAGCAGGAATGCC	TGCAGCTATAATAACCAACAGAAAATTGAAAAGCATTACAGATCGGAAGAGCGGTTCAGCAGGAATGCC	chr2	563643942	1	2.3e-09	Plus	16:T>A	0	0	0	0	0	0	2	0	0	0	0	0	0	0	0	0	0	2	0	0	0	-	-	0	0	0	0	0	0	0	0	-	-	0	2	-	0	2	0	0
D12019	39975930	TGCAGCTTATTGGATCACTCAGCCGGAGTATTCCTGATCAAGAGGTTTTACAGATCGGAAGAGCGGTTC	TGCAGCTTATTGGATCACTCAGCCGGAGTATTCCTGATCAACAGGTTTTACAGATCGGAAGAGCGGTTC	chr4	1567725558	1	2.11e-17	Plus	41:G>C	0	0	0	0	0	0	0	0	0	0	1	0	0	0	0	0	0	0	0	0	0	0	0	0	0	0	0	0	0	0	0	0	-	-	0	-	0	0	0	-
D12038	3525215	TGCAGGAAATAGATAAACATAGGAAAATCTAGATTCATTACAGATCGGAAGAGCGGTTCAGCAGGAATG	TGCAGGAAATAGATAAACATAGGAAAATTTAGATTCATTACAGATCGGAAGAGCGGTTCAGCAGGAATG	chr5	723033524	1	4.46e-12	Minus	28:C>T	0	0	0	0	0	0	0	1	-	0	-	0	0	0	0	-	0	0	0	0	0	0	0	-	0	0	0	0	0	0	0	0	0	0	-	-	0	0	0	-
D12050	22857170	TGCAGGATCACATTTTGACTAATGAGATTACAGATCGGAAGAGCGGTTCAGCAGGAATGCCGAGACCGA	TGCAGGATCACATTTTGACTGATGCGATTACAGATCGGAAGAGCGGTTCAGCAGGAATGCCGAGACCGA	chr1L	1751167851	1	5.77e-07	Minus	24:A>C	0	0	0	0	0	0	0	0	0	0	-	0	0	0	-	0	0	-	0	0	0	0	0	0	0	0	-	0	0	0	0	0	-	0	0	-	0	0	0	0
D12052	39969599	TGCAGGCCAAGAAAGCTTAGCACCAAAGAATTATTTTCTCCATTTGGAACGATTACAGATCGGAAGAGC	TGCAGGCCAAGAAAGCTTAGCACCAAAAAATTATTTTCTCCATTTGCAACGATTACAGATCGGAAGAGC	chr1S	448584613	1	4.09e-20	Plus	27:G>A	0	0	0	0	0	0	0	0	-	0	0	0	0	0	0	0	0	0	-	0	0	0	0	0	0	1	0	0	0	0	-	0	0	-	0	-	0	-	-	-
D12065	3520551	TGCAGGGATGGTAATAGATTTTTATGCACTAGAATATTGATTCTCTTACACTTTTACAGATCGGAAGAG	TGCAGGGATGGTAATAGATTTTTATGCACGAGAATATTGATTCTCTTACACTTTTACAGATCGGAAGAG	chr4	1118845325	1	1.18e-20	Plus	29:T>G	0	0	2	0	0	0	0	0	0	-	0	0	0	1	0	0	0	0	0	0	0	-	0	0	0	1	-	0	0	0	0	-	0	0	0	-	0	0	0	0
D12084	13912792	TGCAGGTGGAGAGATGTCTTAGAATACACTAGAGTCATTTGTTTTACAGATCGGAAGAGCGGTTCAGCA	TGCAGGTGGAGGGATGTCTTAGAATACACTAGAATATTTTGTCTTACAGATCGGAAGAGCGGTTCAGCA	chr3	572180779	1	2.94e-15	Minus	11:A>G	0	0	0	0	0	0	0	0	0	0	0	0	0	1	-	-	0	0	0	0	0	0	0	0	0	0	0	0	-	0	0	0	0	-	0	0	0	0	2	0
D12097	13906000	TGCAGTAAATCAAGCACAAAAGAACAGCAAAACTTGGTCATTTTCAAAATAAAATAATTACAGATCGGA	TGCAGTAAATCAAGCACAAAAGAAATGCAAAACTTGGTCATTTTCAAAATAAAATAATTACAGATCGGA	chr6	348988108	1	8.01e-23	Minus	24:C>A	2	0	0	0	0	0	0	0	0	2	0	0	0	-	0	0	2	0	-	0	0	0	0	0	0	0	0	0	0	0	0	2	0	0	0	0	0	0	0	-
D12098	13906000	TGCAGTAAATCAAGCACAAAAGAACAGCAAAACTTGGTCATTTTCAAAATAAAATAATTACAGATCGGA	TGCAGTAAATCAAGCACAAAAGAACAGAAAAACTTGGTCATTTTCAAAATAAAATAATTACAGATCGGA	chr6	348988105	1	8.01e-23	Minus	27:C>A	0	0	0	0	0	0	0	0	0	0	0	0	0	-	0	0	0	0	1	0	0	0	0	0	0	0	0	0	0	0	0	0	0	2	0	0	0	0	0	-
D12099	13906000	TGCAGTAAATCAAGCACAAAAGAACAGCAAAACTTGGTCATTTTCAAAATAAAATAATTACAGATCGGA	TGCAGTAAATCAAGCACAAAAGAACAGAAAGACTTGGTCATTTTCAAAATAAAATAATTACAGATCGGA	chr6	348988102	1	8.01e-23	Minus	30:A>G	0	0	0	0	0	0	0	0	0	0	0	0	0	-	0	0	0	0	-	0	0	0	0	0	0	0	0	0	0	0	0	0	0	0	0	0	0	0	0	-
D12110	22857601	TGCAGTACTTGCAAGAAAGCCATAGGTGAATTACAGATCGGAAGAGCGGTTCAGCAGGAATGCCGAGAC	TGCAGTATCTGCAAGAAAGCCATAGGTAAATTACAGATCGGAAGAGCGGTTCAGCAGGAATGCCGAGAC	chr1L	1750429461	1	1.98e-08	Minus	7:C>T	0	0	0	-	0	0	0	0	0	0	-	0	0	0	-	0	0	-	-	0	0	0	0	0	0	0	0	-	0	0	-	0	0	0	0	0	0	0	0	0
D12135	39976314	TGCAGTATTTATGAAGACATAGTCAATTCATTTGTAAATAGAAGCAACAGTAAACATTACAGATCGGAA	TGCAGTATTTATGAAGACATAGTCAATTCATTTGTAAATAGAACCAACAGTAAACATTACAGATCGGAA	chr1S	771905798	1	2.79e-22	Plus	43:G>C	0	2	-	0	0	0	0	0	0	0	0	0	0	-	0	0	0	0	-	-	1	0	0	0	0	0	0	0	2	0	0	0	-	-	-	0	0	0	0	0
D12156	3515865	TGCAGTCTGAAATTATTGTACACCAACAAAGTGACAAGTGTGAAAGAAATTAGCTAATTACAGATCGGA	TGCAGTCTGAAATTATTGTACAGCAACAAAGTGACAAGTGTGAAAGAAATTAGCTAATTACAGATCGGA	chr6	1298699165	1	8.01e-23	Plus	22:C>G	0	0	-	-	0	0	0	0	0	0	0	-	0	0	0	0	0	0	0	0	0	0	0	-	0	-	0	0	2	0	0	0	0	-	0	0	0	0	0	0
D12160	32610861	TGCAGTGAATCCATATCCGAGTCGGATTTTACAGATCGGAAGAGCGGTTCAGCAGGAATGCCGAGACCG	TGCAGTGAATCCATATCCTAGTCGGATTTTACAGATCGGAAGAGCGGTTCAGCAGGAATGCCGAGACCG	chr1L	981216929	1	1.92e-07	Plus	18:G>T	0	0	0	0	1	0	0	0	-	0	0	0	0	0	0	0	0	0	-	-	0	0	-	-	0	-	-	-	0	0	0	-	0	0	0	2	0	0	0	0
D12161	32610861	TGCAGTGAATCCATATCCGAGTCGGATTTTACAGATCGGAAGAGCGGTTCAGCAGGAATGCCGAGACCG	TGCAGTGAATCCATATCCGAGTTGGATTTTACAGATCGGAAGAGCGGTTCAGCAGGAATGCCGAGACCG	chr1L	981216933	1	1.92e-07	Plus	22:C>T	0	0	0	0	-	0	2	0	-	0	0	0	0	0	0	0	0	0	-	-	0	0	-	-	0	-	-	-	0	0	0	1	0	0	0	0	0	0	0	0
D12167	39970185	TGCAGTGATTCTAACTGAGCCACAAATAATTTTGAAAATATTACAGATCGGAAGAGCGGTTCAGCAGGA	TGCAGTGATTCTAACTGAGGCACAAATAATTTTGAAAATATTACAGATCGGAAGAGCGGTTCAGCAGGA	chr6	983550554	1	1.16e-13	Minus	19:C>G	0	0	0	-	0	0	0	0	0	0	-	0	0	0	-	0	0	0	0	0	0	0	0	0	0	0	0	0	0	0	0	0	0	-	0	2	0	0	0	0
D12174	32610112	TGCAGTGCTGAGTGAAATATCTTATGTTTATGCCGATAAAGTGATTACAGATCGGAAGAGCGGTTCAGC	TGCAGTGCTGAGTGAAATATCTTATGCTTATACCGATAAAGTGATTACAGATCGGAAGAGCGGTTCAGC	chr1L	88277122	1	8.59e-16	Minus	26:T>C	0	-	0	0	0	0	0	-	0	0	0	0	0	-	0	0	0	0	-	0	0	-	0	0	0	0	-	0	0	0	0	0	0	-	0	-	0	0	0	-
D12195	3523993	TGCAGTTATTCAACCTTCATCATCCCTCTCCTATCATCTTTCTTTTTCTTCTTTCTTTACAGATCGGAA	TGCAGCTATTCAACCTTCATCATCCCTCTCCTATCATCTTTCTTTTTCTTCTTTCTTTACAGATCGGAA	chr2	920205220	1	2.79e-22	Plus	5:T>C	0	0	0	0	0	0	0	0	-	0	0	0	0	-	0	0	0	0	0	0	-	-	-	0	0	0	0	-	0	0	0	0	0	-	0	0	0	0	-	-
D12198	18321202	TGCAGTTCCAAGCATCCAAAAAGCACAAAGGATAATACAGCACCAAAAACAATTACAGATCGGAAGAGC	TGCAGTTCCAAGCATCCAAAAAGCACAAAGGATAATACAACACCAAAAACAATTACAGATCGGAAGAGC	chr1L	1059566937	1	1.9e-18	Plus	39:G>A	1	2	1	1	1	1	1	1	-	1	1	1	1	1	1	1	1	1	1	0	1	1	-	1	1	2	1	-	1	-	1	1	1	2	1	0	1	1	1	1
D12224	39979656	TGCAGTTTGGTTCAGCTATAGTTGTTTATGAAACACAGGTTCGGTTGATTTACAGATCGGAAGAGCGGT	TGCAGTTTGGTTCAGCTATAGTTGTTTATGAAACATAGGTTCGGTTGATTTACAGATCGGAAGAGCGGT	chr5	420327692	1	1.7e-18	Plus	35:C>T	0	0	0	0	0	0	0	0	0	0	0	0	0	0	0	-	0	0	0	0	-	-	0	0	0	0	0	0	0	0	0	0	0	-	0	0	0	0	1	0
D12225	39979656	TGCAGTTTGGTTCAGCTATAGTTGTTTATGAAACACAGGTTCGGTTGATTTACAGATCGGAAGAGCGGT	TGCAGTTTGGTTCAGCTATAGTTGTTTATGAAACACAGGTTCAGTTGATTTACAGATCGGAAGAGCGGT	chr5	420327699	1	1.7e-18	Plus	42:G>A	0	0	2	0	0	0	0	0	2	0	0	0	0	0	0	-	0	0	0	0	-	-	0	0	0	0	0	0	0	0	0	0	0	-	0	0	0	0	-	0
D12288	3519083	TGCAGCTATCCCCGGCCTCTTTAGTTTTGTATTTTCATTTTCTTTTTACAGATCGGAAGAGCGGTTCAG	TGCAGGTATCCCCGGCCTCTTTAGTTTTGTATTTTCATTTTCTTTTTACAGATCGGAAGAGCGGTTCAG	chr3	1190578707	1	2.5e-16	Minus	5:C>G	0	0	0	0	0	0	-	0	0	0	0	0	0	-	0	0	0	0	0	0	0	0	0	0	0	0	0	0	0	0	0	0	0	0	0	-	0	0	0	0
D12289	3519083	TGCAGCTATCCCCGGCCTCTTTAGTTTTGTATTTTCATTTTCTTTTTACAGATCGGAAGAGCGGTTCAG	TGCAGCTATCCCCGGCCTCTTTAGTTTTGCATTTTCATTTTCTTTTTACAGATCGGAAGAGCGGTTCAG	chr3	1190578683	1	2.5e-16	Minus	29:T>C	0	0	0	0	0	0	-	0	2	0	0	0	2	1	2	0	0	0	0	2	0	0	0	0	2	0	0	0	0	0	0	0	2	0	0	-	0	0	0	0
D12313	39976189	TGCAGGTGTATCTGTCATAACCAAACTGATGTGTCTTGGGCAGACATTGAATATATTACAGATCGGAAG	TGCAGGTGAATCTGTCATAACCAAACTGATGTGTCTTGGGCAGACATTGAATATATTACAGATCGGAAG	chr5	368506906	1	9.73e-22	Minus	8:T>A	0	0	0	0	0	0	0	0	0	-	-	0	0	0	0	-	0	0	0	0	0	0	0	1	0	0	0	0	0	0	0	1	0	0	0	-	0	0	0	0
D12347	13911302	TGCAGTTTGGACCAACAATTTGATGGTTTTTCTAAAACTCAATTGAATGAAAGCACATTACAGATCGGA	TGCAGTTTGGACCAACAATTTGATGGTTTTTCTATAACTCAATTGAATGAAAGCACATTACAGATCGGA	chr1L	535823421	1	8.01e-23	Plus	34:A>T	0	1	0	-	0	-	2	0	0	0	0	-	0	0	0	-	0	0	0	0	0	0	0	0	0	0	-	0	0	1	0	0	0	-	0	0	0	0	0	-
D12354	32610782	TGCAGAGCTCCTGATATATGAAATAGTGGCACAGTCAGCACATTACAGATCGGAAGAGCGGTTCAGCAG	TGCAGAGCTCCTGGTATATGAAATAGTGGCACAGTCAGCACATTACAGATCGGAAGAGCGGTTCAGCAG	chr4	1568667811	1	1.01e-14	Minus	13:A>G	0	0	0	-	0	0	0	2	0	2	0	-	0	-	-	-	0	0	-	0	1	0	2	-	0	0	1	0	0	0	0	1	-	0	2	0	0	0	-	0
D12364	3508594	TGCAGCCACCTCTCATGTGCTATACTCCAGGGTTGAATTTGAATCTAATGGTTTACAGATCGGAAGAGC	TGCAGCCACCTCTCATGTGCTATACTCCAGGGTTGAATTTGAATCTAATAGTTTACAGATCGGAAGAGC	chr5	943617483	1	4.09e-20	Minus	49:G>A	0	0	0	0	0	0	0	0	-	0	-	0	0	0	-	-	0	0	0	0	-	0	0	0	2	0	0	0	0	0	0	0	0	-	0	0	-	0	-	2
D12435	3528836	TGCAGAAAATTTCAAAGCCCAAACTCATCAGAACAAAAAAGAATACTTAGAATTCTGATATGAAAATTT	TGCAGAAAATTTCAAAGCCCAAACTCATCAGAACAAAAAAGTAAACTTAGAATTCTGATATGAAAATTT	chr3	395461773	1	9.88e-28	Plus	41:A>T	0	0	0	0	0	0	0	0	0	0	0	0	0	-	0	0	0	0	0	0	-	-	0	0	0	0	0	0	0	0	0	0	0	0	0	0	0	0	0	0
D12448	13863191	TGCAGAAAGAGATCAAGTATAAAAATCACCATTCCATGAAAAATAAACTAGAATCCAACACTGAGAACA	TGCAGAAATAGATCAAGTATAAAAATCACCATTCCATGAAAAATAAACTAAAATCCAACACTGAGAACA	chr2	1433630104	1	9.88e-28	Minus	8:G>T	0	0	-	0	0	0	-	0	0	0	-	0	0	0	-	0	0	0	0	0	0	0	0	-	0	0	0	0	0	0	0	0	0	0	0	0	0	0	0	0
D12449	13863191	TGCAGAAAGAGATCAAGTATAAAAATCACCATTCCATGAAAAATAAACTAGAATCCAACACTGAGAACA	TGCAGAAAGTGATCAAGTATAAAAATCACCATTCCATGAAAAATAAACTAGAATCCAACACTGAGAACA	chr2	1433630103	1	9.88e-28	Minus	9:A>T	0	0	-	0	0	0	-	0	0	0	-	0	0	0	-	2	0	0	0	0	0	0	0	-	0	2	0	0	0	0	2	2	0	0	0	0	0	0	0	2
D12485	32611514	TGCAGAAGAAAAGTATAACTCACACTTACGTTGTTGCACGCTGAATATATATGTCAACAGAAAAAAAAA	TGCAGAAGAAAAGTATAACTCACACTTACGTTGTTGCACGCTGAATATATATGTCAACAGAAAGAAAAA	chr2	562590154	1	9.88e-28	Minus	63:A>G	-	0	0	0	0	0	0	0	0	0	0	2	0	0	0	0	0	0	0	0	0	0	0	0	0	2	0	0	0	0	0	0	0	0	-	0	0	0	0	-
D12515	3516406	TGCAGAATAATCCATTGTACATACAGAGTTTCATGGAGGCCGATGATGCTCTCAAACTTGGTTGATTCA	TGCAGAATAATCCATTGTAAATACAGAGTTTCATGGAGGCCGATGATGCTCTCAAACTTGGTTGATTCA	chr5	753796484	1	4.6e-26	Minus	19:C>A	-	-	-	-	0	0	0	0	0	0	-	0	0	-	0	-	0	0	0	0	-	0	0	0	-	0	0	-	0	0	-	1	2	2	0	-	0	0	0	0
D12516	3516406	TGCAGAATAATCCATTGTACATACAGAGTTTCATGGAGGCCGATGATGCTCTCAAACTTGGTTGATTCA	TGCAGAATAATCCATTGTACATACAGAGTTTCATGGATGCCGATGATGCTCTCAAACTTGGTTGATTCA	chr5	753796466	1	4.6e-26	Minus	37:G>T	-	-	-	-	0	2	0	0	0	0	-	0	0	-	0	-	0	0	0	0	-	0	0	0	-	0	0	-	0	0	-	-	0	0	0	-	0	2	0	0
D12517	3516406	TGCAGAATAATCCATTGTACATACAGAGTTTCATGGAGGCCGATGATGCTCTCAAACTTGGTTGATTCA	TGCAGAATAATCCATTGTACATACAGAGTTTCATGGAGGCCAATGATGCTCTCAAACTTGGTTGATTCA	chr5	753796462	1	4.6e-26	Minus	41:G>A	-	-	-	-	0	0	0	0	0	0	-	0	0	-	0	-	0	0	0	0	-	0	0	0	-	0	0	-	0	0	-	-	0	0	0	1	0	0	0	0
D12518	39977025	TGCAGAATATGTCTCTTTACGTTCCTTCCCAAACGGCTGATAGAATGACACTGTCAAATTCAGAAACTA	TGCAGAATATGTCTCTTTACGTTCCTTCCCAAATGGCTGATAGAATGACACTGTCAAATTCAGAAACTA	chr6	246711595	1	9.88e-28	Minus	33:C>T	0	0	0	0	2	0	0	0	-	2	0	-	0	0	0	0	0	0	0	0	0	0	0	0	0	0	2	0	1	0	0	0	-	2	0	0	0	2	0	0
D12519	39977025	TGCAGAATATGTCTCTTTACGTTCCTTCCCAAACGGCTGATAGAATGACACTGTCAAATTCAGAAACTA	TGCAGAATATGTCTCTTTACGTTCCTTCCCAAACGGCTGATAGAATGACACTGTCCAATTCAGAAACTA	chr6	246711573	1	9.88e-28	Minus	55:A>C	0	0	0	0	0	0	0	0	-	0	0	-	0	0	0	0	0	0	0	0	0	0	0	2	0	0	0	0	-	0	0	0	-	0	0	0	0	0	0	0
D12530	13867381	TGCAGAATGATCCTGATATCATGTCTTTATGCAAAGTATTTGTAACAGCATCAAGAAACAAGAAATCTG	TGCAGAATGATCCTGATATCATGTCTTTATGCAAAGCATTTGTAACAGCGTCAAGAAACAAGAAATCTG	chr2	7062490	1	4.6e-26	Minus	36:T>C	0	0	-	0	0	0	0	0	0	0	-	0	0	0	0	0	0	0	0	0	0	0	-	0	0	0	0	-	-	0	0	0	-	0	-	-	0	0	0	0
D12533	3520070	TGCAGAATTCTTTGCTGATAAGTTGTCACGGAACTAAAGGAAAACAAGAGAGATATAAAACTAATTTAC	TGCAGAATTCTTTGCTGATAAGTTGTTGCGGAACTAAAGGAAAACAAGAGAGATATAAAACTAATTTAC	chr2	1199216385	1	3.55e-27	Minus	26:C>T	0	0	0	0	0	0	0	0	-	0	-	0	0	0	-	0	0	0	-	0	0	0	0	0	0	0	0	0	0	0	0	0	0	0	0	0	0	0	-	0
D12539	3520724	TGCAGAATTTGAAGCTAATACACCTTATATGTACTCTTCTTATGATTTCGAGTGTGAATCAGCTCCCAC	TGCAGAATTTGAAGCTAATACACCATATATGTACTCTTCTTATGATTTCGAGTGTGAATCAGCTCCCAC	chr1S	279682777	1	9.88e-28	Minus	24:T>A	0	0	0	0	0	0	0	0	0	0	0	0	0	0	0	0	0	0	0	-	0	0	2	0	0	0	0	1	0	0	0	-	0	0	0	-	0	0	0	0
D12542	13904362	TGCAGACAAACATCTTCAAGTATTCTTGTTGCATATATAATGACAGTGTACAGCGTTTAGAACAAGGCG	TGCAGACAAACATCTTCGAGTATTCTTGTTGCATATGTAATGACAGTGTACAGCGTTTAGAACAAGGCG	chr1L	1802510419	1	4.6e-26	Minus	17:A>G	0	0	0	0	0	0	0	0	0	0	0	0	0	-	1	0	0	0	-	0	-	0	0	0	0	0	-	0	0	0	0	-	0	0	0	0	0	0	0	0
D12554	3517139	TGCAGACCTAAATATTGAGGTAAAATGCAAATAAATGTGACTAATGATTTATGCAAACAATGCGATCAC	TGCAGACCTAAATATTGAGGTAAAATGCAAATATATGTGACTAATGATTTATGCAAACAATGCGATCGC	chr6	270904699	1	9.88e-28	Minus	33:A>T	0	0	-	0	0	0	0	0	0	0	-	0	2	0	0	0	0	0	0	0	0	0	0	0	0	0	0	0	0	0	0	0	0	0	0	-	0	0	0	0
D12575	32609400	TGCAGACTGATCTGGAGATGAGAATTGCTCAATTGCAGAATGAGCATACTTCCTTATTTCAAAAAGAGG	TGCAGACTGATCTAGAGATGAGAATTGCTCAATTGCAGAATGAGCATACTTCCTTATTTCAAAAAGAGG	chr5	376569146	1	9.88e-28	Plus	13:G>A	0	0	0	0	0	0	0	0	0	0	0	0	0	0	-	0	0	0	0	0	-	0	0	0	0	0	0	0	0	0	0	0	0	0	0	0	2	0	0	0
D12588	32609405	TGCAGAGAATTGCCAGAAAAGCAAGATCTACTTCATAGCATGGTATTCCTATGCTATATTAGTGTTTTC	TGCAGAGAATTGCCAGAAAAGCAAGATCTACTTCATAGCATGGTATTTCTATGCTATATTAGTGGTTTC	chr1L	1207975986	1	9.88e-28	Minus	47:C>T	0	0	0	0	0	0	0	-	0	0	0	0	0	0	0	-	0	0	0	0	0	0	0	-	0	0	0	0	0	0	0	0	-	-	0	0	0	0	0	0
D12605	32611562	TGCAGAGCTTATGGTGATAAGCTGAAAACAGTTCCTGAACATATCATAAGTTGTTTCCATAAGCTGTAA	TGCAGAGCTTATGGTGATAAGCTGAAAACAGTTCCTGAACATATCATAACTTGTTTCCATAAGCTGTAA	chr2	1670095492	1	9.88e-28	Plus	49:G>C	0	0	0	0	0	0	0	-	0	0	0	0	0	1	0	0	0	0	0	0	0	0	0	0	0	0	0	0	0	0	0	0	0	0	0	0	0	0	0	0
D12606	32611562	TGCAGAGCTTATGGTGATAAGCTGAAAACAGTTCCTGAACATATCATAAGTTGTTTCCATAAGCTGTAA	TGCAGAGCTTATGGTGATAAGCTGAAAACAGTTCCTGAACATATCATAAGTTGTTTCCATAAACTGTAA	chr2	1670095505	1	9.88e-28	Plus	62:G>A	0	0	0	0	0	0	0	-	0	0	0	0	0	-	0	0	0	0	0	0	0	0	0	0	0	0	0	0	0	0	0	0	0	0	0	0	0	0	0	0
D12619	3507476	TGCAGAGGAGGCTAAGTGGGAAGACAATCTTGATCAAAAGTCAATTCCCAGATTTCCTGTGTGATGACT	TGCAGAGAAGGCTAAGTGGGAAGACAATCTTGATCAAAAGTCAATTCCCAGATTTCCTGTGTGATGACT	chr5	156295974	1	9.88e-28	Minus	7:G>A	0	0	-	-	0	0	0	0	2	0	-	0	0	1	0	0	0	0	-	0	0	0	0	0	0	0	0	0	0	0	-	0	-	0	0	-	0	0	0	0
D12621	39977147	TGCAGAGGATGAAGACAACAACATCAAAAACTGTTTATGTAATGTTACTGCACCGCACGACACGAACGA	TGCAGAGGATGAAGACAACAACATCAAAAACTGTTTATGTAATGTTACTGCACCGCACGACAAGAACGA	chr4	1130031448	1	9.88e-28	Minus	62:C>A	0	0	0	0	0	0	0	0	0	0	-	0	0	0	0	-	0	0	0	0	0	-	-	-	0	-	0	0	0	0	0	0	0	0	0	0	0	0	0	0
D12675	3520417	TGCAGATGCAGAACTGTTGATTCTAGTTGAGAGTAGAGAGAGTGATGTACTTCAATACTTCAACCACCG	TGCAGATGCAGAACTGTTGATTCTAGTTGAGAGTACAGAGAGTGATGTAGTTCAATACTTCAACCACCG	chr4	1122210202	1	9.88e-28	Plus	35:G>C	0	0	1	-	0	0	0	0	0	0	-	0	0	0	0	0	0	0	0	1	-	0	0	0	0	0	0	0	-	0	2	0	0	0	-	0	-	0	0	0
D12726	32610332	TGCAGATTTGCTTTTCCTCGCTAGTACAAATGTAGATGGTGTTTGTTACATCGAGGTTTGTTCATTGAT	TGCAGATTTGCCTTTCCTCGCAAGTACAAATGTAGATGGTGTTTGTTACATCGAGGTTTGTTCATTGAT	chr1L	769199928	1	9.88e-28	Minus	11:T>C	0	-	0	0	0	0	0	0	0	0	0	0	0	0	0	0	0	0	0	0	0	0	0	-	0	0	0	0	0	0	0	0	0	0	0	0	0	0	0	-
D12727	32610332	TGCAGATTTGCTTTTCCTCGCTAGTACAAATGTAGATGGTGTTTGTTACATCGAGGTTTGTTCATTGAT	TGCAGATTTGCTTTTCCTCGCAAGTACAAATGTAGATGGTGTTTGTTACATCGAGGTTTGTTCATTGAT	chr1L	769199918	1	9.88e-28	Minus	21:T>A	0	-	0	0	0	0	0	0	0	0	0	0	0	0	0	0	0	0	0	0	0	0	0	-	0	0	0	0	0	0	0	0	0	0	0	0	0	0	2	-
D12763	32610350	TGCAGCAAGAGTGAGACAAAAAGAAATAAGCTATTGATAATCTAGATCAACAACTTCCCCTGGTTCTGA	TGCAGCAAGAGTGAGACAAAAAGAAATAAGCTATTGATAATCTAGATCAACAACTTCCCCTGGTTCTAT	chr4	373542173	1	9.88e-28	Plus	67:G>A	0	0	0	0	0	0	0	0	-	0	-	0	0	0	-	0	0	0	0	0	0	0	0	-	0	0	0	0	0	0	0	0	0	0	0	0	0	0	0	0
D12791	3509550	TGCAGCAGATAGAGTGGAGTAGGGACACAAGGGATTTGACTATTTCAAATTTTTCAACTTCAATTATTA	TGCAGCAGATAGAGTGGAGTAGGGACATAAGGGATTTGACTATTTCAAATTTTTCAACTTCAATTATTA	chr6	191545380	1	9.88e-28	Plus	27:C>T	0	0	0	0	0	0	0	0	1	0	0	0	0	1	2	1	0	0	0	0	0	0	2	0	0	-	0	-	0	0	0	0	0	0	2	-	0	0	0	0
D12798	3519025	TGCAGCAGCTTATGATTTATCAGCTTGGGGAATTGCTTTGGCTCAAATGGCTTACGTTGTTGGTTGGTG	TGCAGCAGCTTATGATTTATCAGCTTGGGGAATTGCTTTGGCTCAAATGGCTTACGTTGTTGGCTGGTG	chr5	433730187	1	9.88e-28	Minus	63:T>C	2	-	0	2	0	0	0	0	-	0	0	0	0	-	0	0	0	0	0	0	0	0	-	0	0	1	0	0	0	0	-	0	0	0	0	0	2	0	0	0
D12816	39979071	TGCAGCATAGCAACACATAAAATTTCAACAATAATCAACAATGATTACAAACCCAAACAACTAAATAAA	TGCAGCATAGCAACACATAAAATTTCAACAATAATCAACAATGATTACAAACCCAGACAACTAAATAAA	chr3	1117083578	1	9.88e-28	Plus	55:A>G	0	0	0	0	0	2	0	0	0	0	0	0	0	0	0	0	0	0	0	0	0	0	0	0	0	0	2	0	0	0	0	0	0	0	0	0	0	0	0	0
D12841	3520208	TGCAGCATTTAGGCCAGTGATGAATTTGGGTCTGGAAGTGATGGAAAAGCCAAAGAGAAAGAATGTTAC	TGCAGCATTTAGGCCAGTGGTGAATTTGGGTCTGGAAGTGATGGAAAAGCCAAAGAGAAAGAATGTTAC	chr5	33035458	1	3.55e-27	Plus	19:A>G	0	0	0	0	0	0	-	-	1	-	0	-	0	0	0	-	0	0	-	0	0	0	0	0	0	0	0	0	0	0	-	0	-	0	-	1	0	0	-	0
D12856	3518795	TGCAGCCACTCAGGATTGGTAGAAGAGGGTCTACAAATTTTTGGGATAATGATGAAGGAATATGCAATA	TGCAGCCACTCAGGATTGGTAGAAGAGGGTCTACAAATTTTTGGGATAATGATGAAGGAACATGCAATA	contig_902	72476	1	9.88e-28	Plus	60:T>C	0	0	0	0	0	0	0	0	0	0	0	0	0	0	0	0	0	0	0	1	0	0	0	0	0	0	0	-	0	0	2	-	-	0	0	-	0	0	0	0
D12883	32612065	TGCAGCCGCGGCCTCTGCCTGCATATCAACGAGCAAGTCTTCATTATGTTTGGCTAAATAACCATTACA	TGCAGCCGCGGCCTCTGCCTGCATATCAACGAGCAAGTCTTCATTATGTTTGGCTAAATAACTATTAAA	contig_5925	0	1	1.28e-26	Plus	67:C>A	0	-	0	0	0	0	0	0	0	0	1	1	0	0	-	0	0	0	0	0	0	0	0	0	0	0	0	0	0	0	-	0	0	0	0	0	0	0	0	-
D12887	13908886	TGCAGCCGTCGAGGTGGCTAGTATGGCTGCTATTGCAGCAGCTCACGGTAATAATGCTTCGCTTTATCA	TGCAGCCGTCGAGGTGGCTGGTATGGCTGCTATTGCAGCAGCTCACGGTAATAATGCTTCGCTTTATCA	chr3	1375632726	1	9.88e-28	Plus	19:A>G	0	0	0	0	2	0	0	0	0	0	-	0	0	0	0	0	0	0	0	0	0	0	0	0	0	0	0	0	0	0	0	0	-	0	0	0	0	0	2	0
D12891	13866514	TGCAGCCTCGGCTCTCACTTGTATTGATTCAGAATCTGAAAATAGCTTCCCCTGGTTAGATAGGGGGAA	TGCAGCCTCGGCTCTCACTTGTATCGATTCAGAATCTGAAAATAACTTCCCCTGCTTAGATAGGGGGAA	chr3	603049022	1	9.88e-28	Minus	24:T>C	0	0	0	0	0	0	0	0	0	0	0	0	0	0	0	0	0	0	0	-	0	-	-	0	-	0	0	0	0	0	0	0	0	0	1	0	0	-	0	-
D12937	39978869	TGCAGCTATTCTGCCTTTTCCCTATCACCATTCTTTATTTCTTTAGCTCTCTCTGAACACCAAGGAAGA	TGCAGCTATTCTGCCTTTTCCCTATCACCATTCTTTATTTCTTTAGCTCTCTCTGAACACCGAGGAAGA	contig_444	61412	1	9.88e-28	Plus	61:A>G	0	0	0	0	0	0	0	0	0	0	0	-	2	0	0	-	0	0	0	0	-	0	-	-	0	0	-	0	0	0	0	0	-	0	0	0	0	0	0	-
D12945	3525933	TGCAGCTCTAAGAGCTGTGAAGGAAATGTTGAAACCACATTATGTCACACAAATAATTTTACAGATCGG	TGCAGCTCTAAGAGCTGTGAAAGAAATGTTGAAACCACATTATGTCACACAAATAATTTTACAGATCGG	chr6	311942501	1	2.29e-23	Minus	21:G>A	0	0	0	0	0	0	0	0	0	0	0	0	0	0	0	0	0	0	0	0	0	-	0	0	0	0	0	0	0	0	0	0	0	2	0	0	0	0	0	0
D12946	3525933	TGCAGCTCTAAGAGCTGTGAAGGAAATGTTGAAACCACATTATGTCACACAAATAATTTTACAGATCGG	TGCAGCTCTAAGAGCTGTGAAGGAAATGTTTAAACCACATTATGTCACACAAATGATTTTACAGATCGG	chr6	311942492	1	2.29e-23	Minus	30:G>T	0	0	0	0	0	0	0	0	0	0	0	0	0	0	0	0	0	0	0	0	0	-	0	0	0	0	0	0	0	0	0	0	0	0	2	0	0	0	0	0
D12963	3519292	TGCAGCTGCGCCTTGCTTGACAGCTTGAATGGCAACAACAAGAGAGGCTCCTAACGAAAAATACTCATT	TGCAGCTGCGCCTTGCTTGACAGCTTGAATGGCAACAACAAGAGAGGCTCCTAATGAAAAATACTCATT	chr2	1701486136	1	9.88e-28	Minus	54:C>T	0	0	-	-	0	0	0	0	1	0	-	0	0	0	0	0	0	0	-	0	0	0	-	0	0	0	-	-	0	0	0	0	0	-	0	0	0	-	2	-
D12968	32610434	TGCAGCTGCTGCTGATTTTGCAGCTTGAGCAACTTCTTCAGCCAGAGTTGGTTTGTTGTTAGTTTCTTT	TGCAGCTGCTGCTGATTTTGCAGCTTGAACAACTTCTTCAGCCAGAGTTGGTTTGTTGTTAGTTTCTTT	chr4	1075953141	1	9.88e-28	Plus	28:G>A	0	0	0	0	0	0	0	0	0	0	-	0	0	-	0	-	0	0	0	0	-	0	0	-	0	0	0	0	0	0	0	0	-	0	0	0	0	0	0	0
D12969	39980033	TGCAGCTGGAGCTGAGGAGCCTGTTTCTTTGGAGCTTCCAGCTCCATCTGGTTGGACGAAAAAGGTTTA	TGCAGCGGGAGCTGAGGAGCCTGTTTCTTTGGAGCTTCCAGCTCCATCTGGTTGGACGAAAAAGGTTTA	chr4	1222816219	1	9.88e-28	Minus	6:T>G	0	-	0	0	0	0	0	0	0	0	0	0	0	0	0	0	0	0	0	0	-	0	0	-	0	0	-	0	0	0	0	0	0	0	0	0	0	0	-	0
D12970	39980033	TGCAGCTGGAGCTGAGGAGCCTGTTTCTTTGGAGCTTCCAGCTCCATCTGGTTGGACGAAAAAGGTTTA	TGCAGCTGGAGCTGAGGAGCCCGTTTCTTTGGAGCTTCCAGCTCCATCTGGTTGGACGAAAAAGGTTTA	chr4	1222816204	1	9.88e-28	Minus	21:T>C	0	-	0	0	0	0	0	0	0	0	0	0	0	0	2	2	0	0	2	0	1	0	0	-	0	0	1	0	2	0	0	0	0	0	0	0	0	0	-	0
D12984	13908954	TGCAGCTTCCCTAATTGCGGTTGCCACAAGCACTCGAACCATCTGCAATATTTGGAATGATAAATGTAT	TGCAGCTTCCCTAATTGCGGTTGCCACAAGCACTCGAACCATCTGCAATATTTGGAATGAAAAATGTAT	chr6	1387132231	1	4.6e-26	Minus	60:T>A	0	0	0	0	0	0	-	0	0	0	0	0	0	0	-	0	0	-	0	-	0	0	0	0	0	-	0	1	0	2	0	0	-	0	0	0	0	0	0	-
D12985	13908954	TGCAGCTTCCCTAATTGCGGTTGCCACAAGCACTCGAACCATCTGCAATATTTGGAATGATAAATGTAT	TGCAGCTTCCCTAATTGCGGTTGCCACAAGCACTCGAACCATCTGCAATATTTGGAATGATATATGTAT	chr6	1387132229	1	4.6e-26	Minus	62:A>T	0	0	0	0	0	0	-	0	0	0	0	0	0	0	-	0	0	-	0	-	0	0	0	0	0	-	2	-	0	0	0	2	-	0	0	2	0	2	0	-
D12986	13908954	TGCAGCTTCCCTAATTGCGGTTGCCACAAGCACTCGAACCATCTGCAATATTTGGAATGATAAATGTAT	TGCAGCTTCCCTAATTGCGGTTGCCACAAGCACTCGAACCATCTGCAATATTTGGAATGATAAAAGTAT	chr6	1387132227	1	4.6e-26	Minus	64:T>A	0	2	0	0	0	0	-	0	0	0	0	0	0	0	-	0	0	-	0	-	0	0	0	0	0	-	0	-	0	0	0	0	-	0	0	0	0	0	0	-
D12989	13904718	TGCAGCTTCTCTTTGTGTTCAAGTCAAGGGAGCCATTCCCAGCATGCCTGATAGAAAATCTGTTCTCGA	TGCAGGTTCTCTTTGTGTTCAAGTCAAGGGAGCCATTCCCAGCATGCCTGATAGAAAATCTGTTCTCGA	chr1S	578371846	1	9.88e-28	Minus	5:C>G	0	0	0	0	0	0	0	0	-	-	0	0	0	0	0	0	0	0	-	0	0	0	0	0	0	0	0	0	0	0	0	-	0	0	0	0	0	-	0	-
D13017	3519367	TGCAGGAAGCAATGAAGACAGTATCAGGGTTGCAATACTGGATGAGGCTACAATTGTATGTGTTTTACA	TGCAGGAAGCAATGAAGACAGTATCAGGGTTGCAATATTGGATGAGGCTACAATTGTATGTGTTTTACA	chr3	127868684	1	1.28e-26	Plus	37:C>T	0	0	0	0	0	0	0	1	0	0	0	0	0	-	0	0	0	0	2	-	0	0	0	0	0	0	0	0	2	0	0	0	0	2	0	2	0	0	0	0
D13024	32611673	TGCAGGAATAGAAATCCTTCTGCGCTGCTAAATTGATCGAATATTTTTGGCAGGTACCTAGAAACAGAA	TGCAGGAATAGAAATCCTTCTGCGCTGCTAAATTGATCGAATATTTTTGGTAGGTACCTAGAAACAGAA	chr3	115657128	1	9.88e-28	Plus	50:C>T	0	0	0	0	0	0	0	0	0	-	0	-	0	-	0	0	0	0	0	-	0	0	0	0	0	0	0	0	0	0	0	0	0	0	0	-	0	0	0	0
D13032	22856786	TGCAGGAGAACCCATGATGAACAAAGATATATACTTACGAAAACAAGAAAAGATTTCTACTTTCAACAT	TGCAGGAGAACCCATGATGAACAAAGATATATACTTACGAAAACAAGAAAAGATTTCTACGTTCAACAT	chr1L	810696980	1	4.6e-26	Minus	60:T>G	0	0	0	0	0	0	0	0	0	1	0	0	0	0	0	0	0	0	-	-	0	0	0	-	-	0	-	0	0	0	0	-	0	0	0	0	0	0	0	0
D13039	32608516	TGCAGGAGCATGAAAGAGCATCCTTGGAACCCAGCCTCGCATGAGCCCTCTGGGTCCATCTTTTTTCAC	TGCAGGAGCATGAAAGAGCATCCTTGGAATCCAGCCTCGCATGAGCCCTCTTGGTCCATCTTTTTTCAC	chr1L	231847067	1	9.88e-28	Plus	29:C>T	0	0	0	0	0	0	0	0	0	0	0	0	0	0	0	0	0	0	0	0	0	0	0	0	0	0	0	0	0	0	0	-	0	0	0	-	0	0	-	0
D13041	32608516	TGCAGGAGCATGAAAGAGCATCCTTGGAACCCAGCCTCGCATGAGCCCTCTGGGTCCATCTTTTTTCAC	TGCAGGAGCATGAAAGAGCATCCTTGGAACCCAGCCTCGCATGAGCCCTCTGGGTCCATCTTTTTTACA	chr1L	231847104	1	9.88e-28	Plus	66:C>A	0	0	0	0	0	0	0	0	0	0	0	0	0	0	0	0	0	0	0	0	0	0	0	0	0	0	0	0	0	0	0	-	0	0	0	-	0	0	-	0
D13050	32612117	TGCAGGGTTTTACGCCGGAACAGACAAAGGAAGCCTTTGATGTTGCGAGAAATAGCATTGAACTTCTTT	TGCAGGGTTTTACGCCGGAACAGACAAAGGAAGCCTTTGATGTGGCGAGAAATAGCATTGAACTTCTTT	chr1L	1247855019	1	4.6e-26	Minus	43:T>G	0	0	0	0	0	0	0	0	0	0	0	0	2	0	0	0	0	0	0	0	0	0	0	0	-	0	0	0	-	0	-	-	0	-	0	0	0	0	0	-
D13055	39973820	TGCAGGCAGAAGTTTGAATTTCATAGTGAAAAAAACGTAGGTTGACGTATGCACAGCTGCACTTTTGGT	TGCAGGCAGAAGTTTGAATTTCATAATGAAAAAAACGTAGGTTGACGTATGCACAGCTGCACTTTTGGT	chr2	240493197	1	9.88e-28	Plus	25:G>A	0	2	0	0	2	0	2	1	0	0	0	0	2	-	-	1	0	0	0	2	-	0	0	0	0	0	-	0	0	0	0	0	0	0	0	0	0	2	-	0
D13068	39980984	TGCAGGCTGTCTTCCTAGAACTGTGCTCGAGTCGTGTGTCAATTCTTACCCTTCAAAATCTTACAGATC	TGCAGGCTGTTTTCCTAGAACTGTGCTCGAGTCGTGTGTCAATTCTTACCCTTCAAAATCTTACAGATC	chr6	99917979	1	1.88e-24	Plus	10:C>T	0	-	0	0	0	0	0	0	0	0	-	0	-	0	0	0	0	0	0	-	0	0	0	0	0	0	0	-	0	0	-	-	-	-	0	0	0	0	0	0
D13069	3518963	TGCAGGGATGTCTCAACAACTGTTGAATCAGGTGCTGCAATCATTTCTTCAATATTCCCCCTCCACACA	TGCAGGGATGTCTCAACAACTGTTGAATCAGATGCTGCAATCATTTCTTCAATATTCCCCCTTCACACA	chr2	1189113857	1	9.88e-28	Plus	31:G>A	0	0	0	0	0	0	-	-	1	0	-	0	0	-	-	0	0	0	0	0	0	0	0	0	0	0	0	0	0	0	-	0	0	0	0	0	0	0	0	0
D13070	3518963	TGCAGGGATGTCTCAACAACTGTTGAATCAGGTGCTGCAATCATTTCTTCAATATTCCCCCTCCACACA	TGCAGGGATGTCTCAACAACTGTTGAATCAGGTGCTGCAATCATTTCTTCAATATTCCCCCTTCACACA	chr2	1189113888	1	9.88e-28	Plus	62:C>T	0	0	0	0	0	0	-	-	1	0	-	0	0	-	-	0	0	0	0	0	0	0	0	0	0	0	0	0	0	0	-	0	0	0	2	0	0	0	2	0
D13095	13866641	TGCAGGTATAAAATATTGTCTCTGAAAAGATTTCTATTACCAATATTGCGGTGCCCTTTTACAGATCGG	TGCAGGTATAAAATATTGTCTCTGAGAAGATTTCTATTACCAATATTGCGGTGCCCTTTTACAGATCGG	chr2	1454071257	1	2.29e-23	Plus	25:A>G	0	0	0	0	0	0	0	0	0	0	-	0	0	0	1	0	0	0	0	0	0	0	0	0	0	-	0	-	0	0	0	0	0	0	0	0	0	0	0	0
D13096	13866641	TGCAGGTATAAAATATTGTCTCTGAAAAGATTTCTATTACCAATATTGCGGTGCCCTTTTACAGATCGG	TGCAGGTATAAAATATTGTCTCTGAAAAGATTTCTATTACCAATATGGCGGTGCCCTTTTACAGATCGG	chr2	1454071278	1	2.29e-23	Plus	46:T>G	0	0	0	0	0	0	0	0	0	0	-	0	0	0	-	0	0	0	0	0	0	0	0	0	0	-	0	-	0	0	0	0	0	0	0	0	0	0	0	0
D13124	13865214	TGCAGGTTATGCAAAAACACCAGAAATATTTTGCTGTATGCGATACAAATGGACAACTGCTGCCTTATT	TGCAGGTTATGCAAAAACACCAGAAATATTTTGCTGTATGTGATACAAATGCACAACTGCTGCCTTATT	chr4	7968270	1	9.88e-28	Plus	51:G>C	0	0	-	0	0	2	0	-	0	0	-	0	0	-	0	0	0	0	0	0	0	0	0	0	0	0	0	1	0	0	0	0	0	-	0	0	0	0	0	-
D13129	18318922	TGCAGGTTCACAATACATAAGTTTTGATCACTTGGAAATACAAGCTTATGTTTTATCAACTGTTTCTTC	TGCAGATTCACAATACATAAGCTTTGATCACTTGGAAATACAAGCTTATGTTTTATCAACTGTTTCTTC	chr3	331944771	1	9.88e-28	Minus	5:G>A	0	0	0	0	0	0	0	0	0	0	0	-	0	0	0	0	0	0	0	2	1	0	0	0	0	0	0	0	0	0	0	0	2	0	0	-	2	0	0	0
D13130	22856844	TGCAGGTTCATTGTGAAATGAGGGGTAGCCTTGATCCACCTTGTAATGCGGTGGGATTTATTGATAGAT	TGCAGATTCATTGTGAAATGAGGGGTAGCCTTGATCCACCTTGTAATGCGGTGGGGTTTATTGATAGAT	chr3	612605943	1	9.88e-28	Minus	5:G>A	0	-	-	0	0	0	0	0	0	0	-	0	0	0	0	0	0	0	0	0	0	0	0	0	-	0	0	0	0	0	0	0	0	-	-	0	0	0	0	0
D13131	22856844	TGCAGGTTCATTGTGAAATGAGGGGTAGCCTTGATCCACCTTGTAATGCGGTGGGATTTATTGATAGAT	TGCAGGTTCATTGTGAAGTGAGGGGTAGCCTTGATCCACCTTGTAATGCAGTGGGATTTATTGATAGAT	chr3	612605931	1	9.88e-28	Minus	17:A>G	0	-	-	0	0	0	0	0	0	0	-	0	0	0	0	0	0	0	0	0	0	0	0	0	-	0	0	0	0	0	0	0	0	-	-	0	0	0	0	0
D13138	39981072	TGCAGGTTGCCGAAGTTCATGCTAATGCTCTAGTTTCTGTCAAACCTAAAAAACCTTCTTTACAGATCG	TGCAGGATGCCGAAGTTCATGCTAATGCTCTAGTTTCTGTCAAACCTAAAAAACCTTCTTTACAGATCG	chr2	751329846	1	6.57e-24	Plus	6:T>A	0	0	0	0	0	0	0	0	0	-	0	0	0	-	-	0	0	0	0	-	0	0	2	0	0	0	-	-	0	0	0	0	0	0	0	0	0	-	0	0
D13149	39977827	TGCAGGTTTTGGCACCATCAAAATCTATACATGTCTTATGTAATTATCATGTGGAATTCCAGTTTTTAC	TGCAGGTTTTGGCACCGTCAAGATCTATACATGTCTTATGTAATTATCATGTGGAATTCCAGTTTTTAC	chr2	1370125470	1	3.55e-27	Plus	16:A>G	0	0	0	-	0	0	0	0	0	0	0	0	0	0	-	0	0	0	-	-	0	0	0	0	0	2	0	-	0	0	0	-	0	0	0	-	0	1	0	-
D13159	3523459	TGCAGTAACAAAACGAAATACAGTAAGAATGTCATTTAGATTGAACTGAAGAATCGAATTACAGATCGG	TGCAGTAAGAAAACGAAATACAGTAAGAATGTCATTTAGATTGAACTGAAGAATCGAATTACAGATCGG	chr2	1218845429	1	2.29e-23	Minus	8:C>G	0	0	-	0	2	0	-	0	0	0	0	1	0	0	-	0	0	0	0	0	0	0	0	-	0	2	0	-	0	0	0	0	-	0	0	0	0	0	0	0
D13160	3523459	TGCAGTAACAAAACGAAATACAGTAAGAATGTCATTTAGATTGAACTGAAGAATCGAATTACAGATCGG	TGCAGTAACAAAATGAAATACAGTAAGAATGTCATTTAGATTGAACTGAAGAATCGAATTACAGATCGG	chr2	1218845424	1	2.29e-23	Minus	13:C>T	0	0	-	0	0	0	-	0	0	0	0	-	0	0	-	0	0	0	0	0	0	0	0	-	0	0	0	-	0	0	0	0	-	0	0	0	0	0	0	0
D13161	3523459	TGCAGTAACAAAACGAAATACAGTAAGAATGTCATTTAGATTGAACTGAAGAATCGAATTACAGATCGG	TGCAGTAACAAAACAAAATACAGTAAGAATGTCATTTAGATTGAACTGAAGAATCGAATTACAGATCGG	chr2	1218845423	1	2.29e-23	Minus	14:G>A	0	0	-	0	0	0	-	0	0	0	0	-	0	0	-	0	0	0	0	0	0	0	0	-	0	0	0	-	0	0	0	0	-	0	0	0	0	0	0	0
D13167	3524242	TGCAGTAACTGCACAAAACTACCTTGTGGGTTATCACGAAAATTCTGCTAGGTGTGTTACCATGTCCCC	TGCAGTAACTGCACAAAACTACCTTGTGGGTTATCACGGAAATTCTGCTAGGTGTGTTACCATGTCCCC	contig_8518	88154	1	9.88e-28	Plus	38:A>G	-	-	0	0	0	0	0	0	0	-	-	0	0	0	1	0	0	0	2	0	0	0	0	0	0	0	0	0	1	0	0	0	-	0	0	0	0	1	0	-
D13177	3515137	TGCAGTCATAATTTTGCCTGTTTACTAAGACCATCATGAATTTCATCATGTCTAAAAGATTGTAATGTT	TGCAGTCATAATTTTGCCTGTTTACTAAGACCATCATGAATTGCATCATGTCTAAAAGATTGTAATGTT	chr6	1040631627	1	4.6e-26	Minus	42:T>G	0	0	0	0	0	-	0	-	0	0	0	0	0	0	-	0	0	0	0	0	0	0	0	0	0	-	0	0	-	0	0	0	-	0	-	0	-	-	0	0
D13178	3523271	TGCAGTAATATGTGGAAAATAAAAGTCCTGCTTGATTCAGTGGTTCTATAGTAGGATTGAAGTTCCAAT	TGCAGTAATATGTGGAAAATAAAAGTCCTTCTTGATTCAGTGGTTCTATAGTAGGATTGAAGTTCCAAT	chr1L	731405183	1	9.88e-28	Minus	29:G>T	0	0	-	0	0	0	0	0	0	0	0	0	0	-	0	0	0	0	0	0	-	0	0	0	0	0	0	0	0	0	0	0	0	0	0	0	0	2	0	0
D13195	3507055	TGCAGTACTGAGGAATACAATAACGATATTGGTGAAGGAAAAAGTAAAGGGTCAACTGATTTGAGCTAA	TGCAGTACTGAGGAATAGAATAACGATATTGGTGAAGGAAAAAGTAAAGGGTCAACTGATTTGAGCTAA	chr2	1557364632	1	9.88e-28	Plus	17:C>G	0	0	0	-	-	0	-	-	0	0	0	-	0	0	0	0	-	0	0	-	0	0	0	-	0	-	0	0	0	-	0	0	0	0	0	0	0	0	0	-
D13196	3507055	TGCAGTACTGAGGAATACAATAACGATATTGGTGAAGGAAAAAGTAAAGGGTCAACTGATTTGAGCTAA	TGCAGTACTGAGGAATACAGTAACAATATCGGTGAAGGAAAAAGTAAAGGGTCAACTGATTTGAGCTAA	chr2	1557364634	1	9.88e-28	Plus	19:A>G	0	0	0	1	-	0	-	-	0	0	0	-	0	0	0	0	-	0	0	-	0	0	0	-	0	-	0	0	0	-	0	0	0	0	0	0	0	0	0	-
D13197	3507055	TGCAGTACTGAGGAATACAATAACGATATTGGTGAAGGAAAAAGTAAAGGGTCAACTGATTTGAGCTAA	TGCAGTACTGAGGAATACAATAACAATATCGGTGAAGGAGAAAGTAAAGGGTCAACTGATTTGAGCTAA	chr2	1557364654	1	9.88e-28	Plus	39:A>G	0	0	0	-	-	0	-	-	0	0	0	-	0	0	0	0	1	0	0	-	0	0	0	-	0	-	2	0	0	-	0	0	0	0	0	0	0	0	0	-
D13201	3521063	TGCAGTAGCAATTCCGGATATTTGGTACGTTTTTCAGTTTATGGGATCAACCTCGGCTGTTTGTCTTTC	TGCAGTAGCAATTCCGGATATTTGGTACGTTTTTCAGTTTATGGGATCAACCTCTGCTGTTTGTCTTTC	chr1L	379990538	1	9.88e-28	Minus	54:G>T	0	0	0	0	0	0	0	-	0	0	0	0	2	0	0	-	0	0	0	0	0	0	0	0	-	0	0	0	0	0	0	0	0	-	0	1	0	0	0	-
D13214	13909083	TGCAGTATATGCTCCTCCGTACGAAGTGTTTGATGGTCGGAGACTTTGCATGTTATACTGATATCGTTG	TGCAGTATATGCTCCTCCATACGAAGTGTTTGATGGTCGGAGACTTTGCATGTTATACTGATATCGTTG	chr2	1715984310	1	9.88e-28	Plus	18:G>A	0	0	0	0	0	0	0	0	0	0	0	0	0	0	0	0	0	0	0	2	0	0	0	0	0	0	0	0	0	0	0	0	-	0	2	0	0	-	2	0
D13223	13904921	TGCAGTATTTCTCTGGTTTTCTGTCTTACCTTTTGAAGGTCTTTTATGTAGATTGTAGGACACTCTTTG	TGCAGTATTTCTCTGGTTTTCTGTCTTAGCTTTTGAAGGTCTTTTATGTAGATTGTAGGACACTCTTTG	chr4	352957106	1	9.88e-28	Plus	28:C>G	0	0	0	0	0	0	0	0	0	0	0	0	0	0	0	0	0	0	-	0	1	-	1	0	1	0	0	0	0	0	0	2	0	0	-	0	0	0	0	0
D13226	13909090	TGCAGTCAAATATTCATGTTGTTCAAGATATGGACCGTTCAATCTTGATCGAGCGGTTCACAATTCAAC	TGCAGTCAAATATTTATGTTGTTCAAGATATGGACGGTTCAATCTTGATCGAGCGGTTCACAATTCAAC	chr5	192906955	1	9.88e-28	Plus	14:C>T	0	-	0	0	0	0	-	0	-	0	0	0	0	0	0	0	0	0	0	-	-	0	0	0	0	0	0	0	0	2	0	0	0	0	0	0	-	0	0	0
D13227	13909090	TGCAGTCAAATATTCATGTTGTTCAAGATATGGACCGTTCAATCTTGATCGAGCGGTTCACAATTCAAC	TGCAGTCAAATATTCATGTTGTTCAAGATATGGACCGTTCAATCTTGATCGAACAGTTCACAATTCAAC	chr5	192906993	1	9.88e-28	Plus	52:G>A	0	-	0	0	0	0	-	0	-	0	0	0	0	0	0	2	2	0	0	-	1	0	0	2	0	0	0	0	0	0	0	0	0	0	0	0	-	0	0	2
D13229	18321730	TGCAGTCAAGCCTGAGGATATGGTAGAAGTGTTGAATTGTGTCTGCTTTATTTCAGAAAACGACTCATC	TGCAGTCAAGCCTCAGGATATGGTAGAAGTGTTGAATTGTGTCTGCTTTATTTCAGAAAATGACTCATC	chr2	559533955	1	9.88e-28	Plus	13:G>C	0	-	0	0	0	0	0	0	0	0	-	-	0	0	0	0	0	0	-	0	0	0	0	-	0	0	0	0	0	0	0	-	0	-	0	0	0	0	0	0
D13230	18321730	TGCAGTCAAGCCTGAGGATATGGTAGAAGTGTTGAATTGTGTCTGCTTTATTTCAGAAAACGACTCATC	TGCAGTCAAGCCTGAGGATATGGTAGAAGTGTTGAATTGTGTCTGCTTTATTTCAGAAAATGACTCATC	chr2	559534002	1	9.88e-28	Plus	60:C>T	0	-	0	0	2	0	0	0	0	0	1	1	2	0	0	0	0	0	-	0	0	0	0	-	0	0	0	0	0	0	2	-	0	-	0	0	0	0	0	0
D13233	3515938	TGCAGTCACAGCCAACAATAACCAGCTTCGCAATCGCAAACACTAGCATTACCACGAAGATCCAAAAGT	TGCAGTCACAGCCAACAATAACCAGCTTCGTAATCGCAAACACTAGCATTACCACGAAGATCCAAAAGT	chr1L	625680819	1	9.88e-28	Minus	30:C>T	0	0	-	0	0	0	1	0	0	0	-	-	-	-	-	0	0	0	0	0	-	0	0	0	0	0	0	0	0	0	0	0	-	-	0	0	0	2	0	0
D13234	3515938	TGCAGTCACAGCCAACAATAACCAGCTTCGCAATCGCAAACACTAGCATTACCACGAAGATCCAAAAGT	TGCAGTCACAGCCAACAATAACCAGCTTCGCAATCGCAAACACTAGCATTACCACGAAGATCCAAATGT	chr1L	625680783	1	9.88e-28	Minus	66:A>T	0	0	1	2	0	0	-	0	0	0	-	1	-	-	-	0	0	0	0	0	1	0	0	0	0	0	0	0	2	2	0	0	-	-	0	0	0	0	0	0
D13239	3511151	TGCAGTCACTAGGGCTGAATATATTTCATTCATTTACATTATGTGGTTATAACTATTGTATTAGTGTAA	TGCAGTCACTAGGGCTGAATATATTTCATTCATTTACATTATGTGCTTATAACTATTGTATTAGTGTAA	contig_8885	76701	1	9.88e-28	Minus	45:G>C	0	0	0	0	0	0	0	-	0	0	0	-	2	1	0	0	0	0	0	0	0	0	0	0	0	-	0	0	0	0	0	0	0	-	1	-	0	0	1	0
D13252	32609670	TGCAGTCCCTTTGCAATTCCTATGATAGTGGGACCATCACATTTAGGTCAATCTGAATTTCCTTAGTTT	TGCAGTCCCTTTGCAATTCCTATGATAGTGGGACCATCACATTTAGGTCAATCTGAATTTCCTAAGTTT	chr3	1502597101	1	4.6e-26	Plus	63:T>A	1	1	1	1	1	1	-	1	1	1	0	1	1	1	1	0	1	1	1	1	-	1	1	1	1	1	1	1	1	1	1	1	1	-	1	1	1	1	1	1
D13259	3531422	TGCAGTCGAATAAGGATTAGGCGGTTCATATGACCAAACTATTGGGGATACCCCATGGTTTTATTCCCC	TGCAGTCGCATAAGGATTAGGCGGTTCATATGACCAAACTATTGGGGATACCCCATGGTTTTATTCCCC	chr3	1132518481	1	9.88e-28	Plus	8:A>C	0	0	0	0	0	0	0	0	0	-	-	0	0	-	0	0	0	-	-	0	-	0	0	-	0	0	0	0	0	0	0	-	0	0	-	-	0	-	-	0
D13260	3531422	TGCAGTCGAATAAGGATTAGGCGGTTCATATGACCAAACTATTGGGGATACCCCATGGTTTTATTCCCC	TGCAGTCGAATAAGGATTAGGTGGTTCATATGACCAAACTATTGGGGATACCCCATGGTTTTATTCCCC	chr3	1132518494	1	9.88e-28	Plus	21:C>T	0	0	0	0	0	0	0	0	0	-	-	0	0	-	0	0	0	-	-	0	-	0	0	-	0	0	0	0	0	0	0	-	0	0	-	-	0	-	-	0
D13264	22856000	TGCAGTCGGGAATTGCCCACAGTCATGCATTTGGGACATTAGTGACCCTTCGATCAAGGTCAGATGGTC	TGCAGTCGGGATGTGCCCACAGTCATGCATTTGGGACATTAGTGACCCTTCGATCAAGGTCAGATGGTC	chr1S	755174662	1	9.88e-28	Minus	11:A>T	0	0	0	0	0	2	0	0	0	0	0	0	0	-	0	0	0	0	0	0	-	0	0	-	0	0	0	-	-	0	-	0	0	-	0	0	0	0	0	-
D13266	22856000	TGCAGTCGGGAATTGCCCACAGTCATGCATTTGGGACATTAGTGACCCTTCGATCAAGGTCAGATGGTC	TGCAGTCGGGAATTGCCCACAGTCATGCATTTGGGACATTAGTGACCCTTCGATCAAGCTCAGATGGTC	chr1S	755174615	1	9.88e-28	Minus	58:G>C	0	0	0	0	0	0	0	0	0	0	0	0	0	-	0	0	0	0	0	0	-	0	0	-	0	0	0	-	-	0	-	0	0	-	0	0	0	0	2	-
D13272	39974420	TGCAGTCGTCTTCTTGCTTGATGAGGTTTGGAGAAACAGTGTTCCTGTATTTTTATGTTTTTACTGTAT	TGCAGTCGTCTTCTTGCTTGATGAGGTTTGGAGAAACAGTGGTCCTGTATTTTTATGTTTTTACTGTAT	chr3	603054206	1	9.88e-28	Plus	41:T>G	0	0	0	0	0	0	0	-	0	0	0	-	0	0	2	0	0	0	0	0	0	-	-	0	0	-	0	0	0	0	0	0	0	-	-	0	0	0	0	0
D13273	39974420	TGCAGTCGTCTTCTTGCTTGATGAGGTTTGGAGAAACAGTGTTCCTGTATTTTTATGTTTTTACTGTAT	TGCAGTCGTCTTCTTGCTTGATGAGGTTTGGAGAAACAGTGTTCCTGTATTTTTATGTTTTTGCTGTAT	chr3	603054227	1	9.88e-28	Plus	62:A>G	0	0	0	0	0	0	0	-	0	0	0	-	0	0	0	0	0	0	0	0	0	-	-	0	0	1	0	0	0	0	0	0	0	-	-	0	0	0	0	0
D13293	39967459	TGCAGTGATACCAATAGAAGATTCGGGTATACGGTAGTCACGTCACTAGTGTGATTTCCTTTTGTTTCG	TGCAGTGATACCAATAGAAGATTCGGGTATACGGTAGTCACGTCACTAGTTTGATTTCCTTTTGTTTCG	chr2	310322445	1	9.88e-28	Plus	50:G>T	0	0	0	0	0	0	0	0	0	0	-	0	0	0	0	0	0	0	0	0	0	0	-	0	0	-	0	0	0	0	0	0	0	-	-	-	0	0	0	0
D13314	32608616	TGCAGTGGCAAACATGGCGGGGCGGCTACTATCTAGATTATTGTGGCTCAAAATCGGCATTTATAGATT	TGCAGTGGCAAACGTGGCGGGGCAGCTACTATCTAGATTATTGTGGCTCAAAATCGGCATTTATAGATT	chr5	738802620	1	9.88e-28	Plus	13:A>G	0	0	0	0	0	0	0	0	0	0	0	0	0	0	0	0	0	0	0	-	0	0	0	0	0	0	0	0	0	0	0	0	0	0	0	0	0	0	0	-
D13315	32608616	TGCAGTGGCAAACATGGCGGGGCGGCTACTATCTAGATTATTGTGGCTCAAAATCGGCATTTATAGATT	TGCAGTGGCAAACATGGCAGGGCGGCTACTATCTAGATTATTGTGGCTCAAAATCGGCATTTATAGATT	chr5	738802625	1	9.88e-28	Plus	18:G>A	0	0	0	0	0	0	0	0	0	0	0	0	0	0	0	0	0	0	0	-	0	0	0	0	0	0	0	0	0	0	0	0	0	0	0	0	0	0	0	-
D13316	3524900	TGCAGTGGCACGAAGAAAATGCAAAAGATAACCCTAAAATTCTACATGCCTCAGAGCGCTGTGCATCTG	TGCAGTGGCACGAAGAAAATGCAGAAGATAACCCTAAAATTCTACATGCCTCGGAGCGCTGTGCATCTG	chr3	186714364	1	4.6e-26	Plus	23:A>G	0	-	0	0	0	0	-	0	-	0	0	0	0	-	0	0	0	0	0	0	0	0	0	0	0	0	0	0	0	0	0	0	0	0	0	0	0	-	-	-
D13317	3524900	TGCAGTGGCACGAAGAAAATGCAAAAGATAACCCTAAAATTCTACATGCCTCAGAGCGCTGTGCATCTG	TGCAGTGGCACGAAGAAAATGCAACAGATAACCCTAAAATTCTACATGCCTCGGAGCGCTGTGCATCTG	chr3	186714365	1	4.6e-26	Plus	24:A>C	0	-	0	0	0	0	-	0	-	0	0	0	0	-	0	0	0	0	0	0	0	0	0	0	0	0	0	0	0	0	0	0	0	0	0	0	0	-	-	-
D13318	3524900	TGCAGTGGCACGAAGAAAATGCAAAAGATAACCCTAAAATTCTACATGCCTCAGAGCGCTGTGCATCTG	TGCAGTGGCACGAAGAAAATGCAAAAGATAACCCTAAAATTCTACATGCCTCGGAGCGCTGTGCATCTG	chr3	186714393	1	4.6e-26	Plus	52:A>G	0	-	0	0	0	0	-	0	-	0	0	0	0	-	0	0	0	2	0	0	0	0	0	0	0	0	0	0	0	2	0	0	0	0	0	0	0	-	1	-
D13341	3521879	TGCAGTTAGCTCTGATTTGGAAAATATGATGACAGATGCAGCAAGTTTTGATGGTTTTTTACAGATCGG	TGCAGTTAGCTCTGATTTGGAAATTATGATGACAGATGCAGCAAGTTTTGATGGTTTTTTACAGATCGG	chr6	1314577777	1	2.29e-23	Minus	23:A>T	0	0	0	0	0	2	0	0	0	0	0	0	2	0	0	0	2	0	0	0	1	0	0	0	0	0	0	0	1	0	0	-	2	0	0	2	0	0	0	0
D13351	22857727	TGCAGTTATTGAGTGGGGAAAAAATTTAGATCACGTTTTGAGAGTTTTACTTTCTCATATTTTACAGAT	TGCAGTTATTGAGTGGGGAAAAAATTTAGATCATGTTTTGAGAGTTTTACTTTCTCATATTTTACAGAT	chr5	505124306	1	2.5e-23	Minus	33:C>T	1	1	1	1	1	1	1	2	-	-	1	1	1	1	1	1	1	2	-	2	-	2	0	-	1	1	1	1	1	1	1	1	1	-	1	0	1	-	1	1
D13359	39971915	TGCAGTTCAAGCAGGGTTGGCACGTCTTCTTGGAGCTGCTGTCCCCCCTGGGACCAGTGCCCGTGAAAA	TGCAGTTCAAGCAGGGTTGGCACGTCTTCTTGGAGCTGCTGTCCCCCCAGGGACCAGTGCCCGTGAAAA	chr3	1212823193	1	9.88e-28	Plus	48:T>A	0	-	0	0	0	0	0	0	-	0	-	-	0	-	0	-	0	0	-	0	0	0	0	0	0	0	-	0	0	0	0	-	0	2	0	-	0	0	0	0
D13367	39978041	TGCAGTTCATGTAGTTGCTTAGTCAGTTAGTGTCCAGAAGTTTGCTAGAATAACAAAAATGTAAAATGT	TGCAGTTCATGTAGTTGCTTAGTCAGTTAGTGGCCAGAAGTTTGCTAGAATAACAGAAATGTAAAGTGT	chr3	1215636637	1	9.88e-28	Minus	32:T>G	0	0	0	0	0	0	0	-	0	-	0	0	0	0	0	0	0	0	0	-	0	0	-	-	0	-	0	0	0	0	0	0	0	1	0	0	0	0	0	-
D13374	3512748	TGCAGTTCTGCGAATGATTGGCAGATTTGCATTCTTCAATAAACGTTCCGTCAGGCGGTAAAGCTGTGC	TGCAGTTCTGCGAATGATTGGCAGATTTGCGTTCTTCAATAAACGTTCCGTCAGGCGGTAAAGCTGTGC	chr6	1366110752	1	4.6e-26	Plus	30:A>G	1	1	-	1	1	1	1	1	-	1	1	1	1	1	1	1	1	1	1	1	1	1	-	2	2	1	0	1	1	1	1	1	1	1	1	1	1	1	-	1
D13388	3522643	TGCAGTTGATAATTGATACTCCCCCAAGACTTTCTGTTCTTTTTACTCTGAAAAAACAAAAGTCAAGGA	TGCAGTTGATAATTGATACTCCCCCAAGACTTTCTGTTCTTTTTACTCTGAAAAAACAAAAGTCAAAGA	chr6	794440613	1	4.6e-26	Minus	66:G>A	0	0	0	-	2	0	0	0	0	1	0	0	0	0	0	-	0	0	0	0	0	0	0	0	0	-	0	0	0	0	0	0	0	0	0	0	1	-	0	-
D13390	3523132	TGCAGTTGCCATTCATTGGAATACACCAAAGACATTGCTGGTGGAGTGTAGTACGAAGTGCACGGACTC	TGCAGTTGCCATTCATTGGAATACACCAAAGACATTGCTGGTGGAGTGTAGTACGAAGTGAACGGGCTC	chr2	881742640	1	9.88e-28	Plus	65:A>G	0	0	0	0	0	0	-	0	-	0	-	0	0	0	-	0	2	0	0	0	0	0	0	0	0	2	0	0	0	0	0	2	0	0	0	0	0	0	-	1
D13393	3519012	TGCAGTTGCTAAGGCTGTGTCCCTCTTCAGCATCTGTTTCATTTATGCACAATTATTTTTTTACAGATC	TGCAGTTGCTAAGGCTGTGTCCTTCTTCAGCATCTGTTTCATTTATGCACAATTATTTTTTTACAGATC	chr2	3404314	1	1.88e-24	Minus	22:C>T	0	-	0	0	0	0	0	0	0	0	0	0	0	1	0	0	0	0	-	0	0	0	0	0	0	0	0	0	0	-	0	0	0	0	0	-	0	0	0	-
D13409	13866776	TGCAGTTTATCTTATCAACAGACTACCCACATCATCTCTTCAATTCAAAGTCCCTTTTACTCTTCTTTT	TGCAGTTTATCTTACAAACAGACTACCCACATCATCTCTTCAATTCAAAGTCCCGTTTACTCTTCTTTT	chr2	909094277	1	9.88e-28	Plus	54:T>G	1	0	0	0	0	0	0	0	0	0	-	0	0	-	0	0	0	0	0	-	0	0	0	0	0	0	0	0	0	0	0	0	0	-	0	0	0	0	0	-
D13411	13909197	TGCAGTTTATGCTTTTCATGTGTTTGTCTCATTTCAATTGCCTCTAATAAAATGGTGAAGTAGTTTTAC	TGCAGTTTATGCTTTTCACGTATTTGTCTCATTTCAATTGCCTCTAATAAAATGGTGAAGTAGTTTTAC	chr1S	605374893	1	3.55e-27	Minus	21:G>A	0	0	0	-	0	0	0	0	0	0	0	0	0	-	-	-	0	0	-	0	0	0	0	0	0	0	0	0	0	0	0	0	0	-	0	0	0	0	0	0
D13412	3510033	TGCAGTTTCAGAAGAACGGTACTCTGAGAAGACTGAAAAGGCTAGGAAATCCCGTAAAAGCAAGGTACA	TGCAGTTTCAGAAGAACGGTACTCTGAGAAGACTGAAAAGGCTAGGAAATCTCGTAAAAGCAAGGTACA	chr6	1071373175	1	9.88e-28	Minus	51:C>T	0	0	0	-	0	0	0	0	0	0	-	0	1	0	0	2	0	0	-	0	0	0	0	-	0	0	0	0	0	0	0	0	-	0	0	0	0	0	0	0
D13424	13866786	TGCAGTTTTACACTTTCACTGCTTAGACACGCCGGCGGGGTTATGGGCACGATACAGGGAGGGATTTTG	TGCAGTTTTACACTTTCACTGCTTAGACACGCCGGCGGGGTTATGGGCACGATACAGGGAAGGATTTTG	chr1L	208735220	1	9.88e-28	Minus	60:G>A	2	0	0	0	0	0	0	0	-	0	-	0	0	-	0	0	-	0	0	0	0	0	0	0	0	-	-	0	0	0	0	0	0	0	0	0	2	0	0	0
D13461	32610246	TGCAGAAGTGGTTTCTGTCTCTATAGGTTTGGAAATCTTATATGAAGAGTCGTCTTTATCTGATGATTT	TGCAGAAGTGGTTTCTGTCTCTATAGGTTTGGAAATCTTATATGAAGAGTCGTCTTTATCTAATGATTT	chr1L	1617059150	1	9.88e-28	Plus	61:G>A	0	0	0	0	0	0	0	0	0	0	0	0	0	-	-	0	0	-	0	0	0	-	-	0	0	-	0	0	0	0	0	0	0	0	0	0	0	-	0	-
D13590	22857436	TGCAGGGCTTTCTTTGGTGAGAAGCTTGATTTCCTCCCTAGGTGGATTCAACTGATCATTATATTGATC	TGCAGGGCTTTCTTTGGTGAGAAGCTTGATTTCCTCCCTGGGTGGATTCAACTGATCATTATATTGATC	chr4	812631352	1	9.88e-28	Minus	39:A>G	0	0	0	0	0	0	2	0	0	0	0	0	0	0	0	0	0	0	0	0	0	0	0	0	0	0	0	0	0	0	0	1	0	0	0	0	0	0	0	0
D13641	13863470	TGCAGTGCTATTACCATGTGGTGGAATGATTCTTTTGCTGGTTTTTGGTTTTTTTCTTTTCTGGAGAAA	TGCAGTGCTATTACCATGTGGTGGAATGATTCTTTTGCTGGTTTTGGGTTTTTTTCTTTTCTGGAGAAA	chr2	478576010	1	4.6e-26	Plus	45:T>G	0	-	0	0	0	0	0	1	0	0	0	0	0	-	2	-	0	0	-	-	0	0	0	-	-	0	0	0	0	0	0	0	0	0	-	0	0	0	0	0
D13656	39980313	TGCAGTTCTAATTATTTTTTGTTCTTCCTTGTTGCAGTTATGCTGTATCCTTGTCTCTGAAAAGTTTAC	TGCAGTTCTAATTATTTTTTGTTCTTCCTTGTTGCAGTTATGCTGTATCCTTGTCTCTGAAAAATTTAC	chr1L	1383101630	1	3.55e-27	Minus	63:G>A	0	2	0	0	0	0	0	0	0	0	0	0	0	-	0	0	0	0	0	0	-	0	-	0	0	0	0	0	0	0	0	0	0	-	0	0	0	0	0	0
D13658	32613591	TGCAGTTGCTGCATGTAAGTTGTTCCATGATTATGTAGTTTGAATTTGAAATTGTGTTTTTACAGATCG	TGCAGTTGCTGCATGTAAGTTGTTCCAGGATTATGTAGTTTGAATTTGAATTTGTGTTTTTACAGATCG	chr1S	859193899	1	6.57e-24	Minus	27:T>G	0	0	0	0	0	-	0	0	-	0	0	0	0	1	0	0	0	0	-	0	-	0	2	-	0	0	0	-	0	0	0	0	0	0	0	0	0	0	-	0
D13659	32613591	TGCAGTTGCTGCATGTAAGTTGTTCCATGATTATGTAGTTTGAATTTGAAATTGTGTTTTTACAGATCG	TGCAGTTGCTGCATGTAAGTTGTTCCAGGGTTATGTAGTTTGAATTTGAATTTGTGTTTTTACAGATCG	chr1S	859193897	1	6.57e-24	Minus	29:A>G	0	0	0	0	0	-	0	0	-	0	0	0	0	1	0	0	0	0	-	0	-	0	0	-	0	0	0	-	0	0	0	0	0	0	0	0	0	0	-	0
D13668	18321408	TGCAGTTTGGACATCCATATATGGTTCCTTTTGGACGAGAAGAGTTTGTACGGGGATTCTGCAAATAAA	TGCAGTTTGGACATCCATATATGGTTCCTTTTGGACGAGAAGAGTTTGTACGGGGATTCTGCAAATAAG	chr5	875232290	1	9.88e-28	Plus	68:A>G	0	0	0	0	0	0	0	0	-	0	0	0	0	-	0	-	2	0	-	0	-	0	0	0	0	-	-	0	0	0	0	0	2	0	0	0	0	-	0	0
D13674	39963055	TGCAGAAAATTAGTAATAGCAGTCAACGGGAATACCATATTGAATGATTATTTTCCAGTCGGCACTGAC	TGCAGAAAATTAGTAATAGCAGTCAACGGGAATACCATATTGAATGATTATTTTCCAGTTGGCACTGAC	chr3	520178290	1	9.88e-28	Plus	59:C>T	0	0	1	2	2	0	0	0	0	0	-	0	2	0	0	0	0	0	-	0	0	0	0	0	0	0	1	0	0	0	-	-	2	0	0	-	0	0	0	0
D13688	3525910	TGCAGATACATGGGAACGATTATCGGTATCAGTGATGTCGATCCACTAAGGTGGCCTGGTTCTAAGTGG	TGCAGATACATGGGAACGATTATCGGTATCAGTGATGTCGATCCAGTAAGGTGGCCTGGTTCTAAGTGG	chr3	1616165275	1	4.6e-26	Minus	45:C>G	0	0	0	0	0	0	0	0	0	0	0	-	0	-	0	0	0	0	-	0	0	0	0	0	0	0	0	-	-	0	0	0	0	-	0	0	0	0	0	-
D13781	32611738	TGCAGTCGAGCCAGTGATCCATACAAGTATAACACGCTTCCCCCACTTCCGGCTCAACGCAATTTACAG	TGCAGTCGAGCCAGTGATCCATACAAGTATAACACGCTTCCCCCACTTCCAGCTCAACGCAATTTACAG	chr6	1190135258	1	4.6e-26	Minus	50:G>A	0	0	0	0	2	0	0	0	0	0	0	0	0	0	0	-	0	0	0	0	0	0	0	1	0	0	2	0	0	0	0	0	0	-	0	-	0	-	0	-
D13812	13911848	TGCAGAAAACAACATTGGCTGATGTCGTATCGGTAACTCATCTAACATTATGTTACAGATCGGAAGAGC	TGCAGAAAACAACATTGGCTGATGTCGTATCGGTAACTCATCTAACATTCTGTTACAGATCGGAAGAGC	chr3	401405043	1	4.09e-20	Plus	49:A>C	0	0	0	0	0	0	-	0	-	0	0	0	2	0	0	0	0	-	0	0	0	0	0	0	0	0	0	-	0	0	0	0	0	-	0	0	0	-	-	-
D13822	32609972	TGCAGAAATCATAGACAAAGGAAAATAAAGTAGAACAAAAATGGAATACAAATGCTTTACAGATCGGAA	TGCAGAAATCATAAACAAAGGAAAATAAAGTAGAACAAAAATGGAATACAAATGCTTTACAGATCGGAA	contig_7061	337438	1	2.79e-22	Minus	13:G>A	0	0	0	0	0	0	0	0	0	0	0	0	0	0	-	0	0	-	0	0	0	-	0	-	0	0	0	0	0	0	0	0	-	0	0	0	0	0	0	0
D13833	3529805	TGCAGAACCAGAATCAGGGATATGCATCATTCACATTCAACAAAAATATTACAGATCGGAAGAGCGGTT	TGCAGAACCAGAATCAGGGATATGCATCAATCACATTCAACAAAAATATTACAGATCGGAAGAGCGGTT	chr4	364262246	1	5.87e-18	Plus	29:T>A	0	0	-	0	0	0	0	0	0	0	-	0	2	0	-	0	2	0	0	1	0	0	-	0	0	-	0	0	0	0	-	0	0	1	0	0	0	0	0	0
D13840	39975300	TGCAGAAGCTAGATTTTGTCTAGCTACGGAGTCAACTAAACGTTGGGAACAATGATTACAGATCGGAAG	TGCAGAAGCTAGATTTTGTCTAGCTACGGAGTCAACTAATCGTTGGGAACAATGATTACAGATCGGAAG	chr4	1307214857	1	9.73e-22	Plus	39:A>T	0	0	-	0	0	0	0	0	0	1	0	-	0	0	1	-	2	0	0	-	-	0	0	-	1	0	0	-	0	0	0	0	0	0	0	-	0	0	0	1
D13875	3517015	TGCAGAGTGGATTTAGTGTTGTACTATGCACAAGTTTTTTTACAGATCGGAAGAGCGGTTCAGCAGGAA	TGCAGAGTGGATTTAGTGTTGTACTATGCACATGTTTTTTTACAGATCGGAAGAGCGGTTCAGCAGGAA	chr6	1003135665	1	1.83e-11	Plus	32:A>T	0	0	0	1	0	0	2	0	0	1	0	0	0	0	0	0	0	0	0	0	2	0	2	0	0	-	0	-	-	0	0	2	0	-	0	0	0	0	0	0
D13881	32610787	TGCAGATAACAAGCCGGCCTCCAGCAGTGGACAGCTGAATAAACAGAAACAAATTACAGATCGGAAGAG	TGCAGATAACAAGCCGGCCTCCAGCAGTGGACAGCTGAACAAACAGAAACAAATTACAGATCGGAAGAG	chr3	1545339153	1	1.18e-20	Plus	39:T>C	0	0	-	0	0	0	0	0	0	0	0	0	0	0	0	0	0	0	0	0	0	0	0	0	0	0	0	0	0	0	-	0	0	0	0	0	0	0	0	0
D13896	13863905	TGCAGATTTATCTACTAAAAAAATTTCCGCTCAGAAAGCATTTGCAAGAATTATTTTACAGATCGGAAG	TGCAGATTTATCTACTAAAAGAATTTCCGCTCAGAAAGCATTTGCAAGAATTATTTTACAGATCGGAAG	chr3	393312976	1	9.73e-22	Minus	20:A>G	0	0	0	0	0	0	0	0	0	0	0	-	0	0	-	0	0	0	0	0	0	-	0	0	0	0	0	0	0	0	0	0	-	0	0	0	0	0	0	0
D13897	13863905	TGCAGATTTATCTACTAAAAAAATTTCCGCTCAGAAAGCATTTGCAAGAATTATTTTACAGATCGGAAG	TGCAGATTTATCTACTAAAAAAAATTCCGCTCAGAAAGCATTTGCAAGAATTATTTTACAGATCGGAAG	chr3	393312973	1	9.73e-22	Minus	23:T>A	0	0	2	0	0	0	0	0	0	0	0	-	0	0	-	0	0	0	0	0	0	-	0	0	0	0	0	0	0	0	0	0	-	2	0	0	0	0	0	0
D13900	39968871	TGCAGATTTTACTCACCGCCGCTTTGTTTTGATTACAGATCGGAAGAGCGGTTCAGCAGGAATGCCGAG	TGCAGATTTTACTCACTGCCGCTTTGTTTTGATTACAGATCGGAAGAGCGGTTCAGCAGGAATGCCGAG	chr6	246457221	1	1.92e-09	Plus	16:C>T	0	0	0	0	0	2	0	0	-	-	-	0	0	0	0	0	0	0	0	0	0	0	0	2	0	-	0	0	0	0	0	0	0	-	2	-	0	0	0	0
D13931	13911941	TGCAGCCAAACAAGTTGCTACCCTGTCATAATAAAACAGTTACAGATCGGAAGAGCGGTTCAGCAGGAA	TGCAGCCAAAAAAGTTGCTACCCTGTCATAATAAAACAGTTACAGATCGGAAGAGCGGTTCAGCAGGAA	contig_4126	42405	1	3.94e-13	Minus	10:C>A	0	0	0	0	0	0	0	0	-	0	0	0	0	0	0	-	0	0	-	0	0	0	-	-	0	0	0	0	0	0	0	0	-	-	0	0	0	-	-	-
D13956	13868621	TGCAGCTACGGATATCATAAGATCAAGCAAATATTATTTTACAGATCGGAAGAGCGGTTCAGCAGGAAT	TGCAGCTATGGATATCATAAGATCAAGCAAATATTATTTTACAGATCGGAAGAGCGGTTCAGCAGGAAT	chr6	1181064196	1	1.33e-12	Minus	8:C>T	0	0	0	0	0	0	0	-	0	0	0	0	0	0	0	-	0	0	0	-	0	-	-	0	0	0	0	0	0	0	0	-	0	-	0	-	0	0	0	-
D13959	13867816	TGCAGCTAGTTGATGGCTCGACGGTAGTTGAGATTGTGCAATTTTACAGATCGGAAGAGCGGTTCAGCA	TGCAGCAAGTTGATGGCTCGACGGTAGTTGAGATTGTGCAATTTTACAGATCGGAAGAGCGGTTCAGCA	chr6	1369934361	1	2.94e-15	Plus	6:T>A	0	0	0	0	0	0	-	0	0	0	0	-	0	-	0	0	0	1	0	0	0	0	-	0	0	0	0	0	0	0	-	0	0	0	0	-	0	0	0	0
D13971	3525353	TGCAGGAAAGTTAGGAAAGCTTGAATTCTCAAGCACTGAGATGCCAGGGATTCGTTTTACAGATCGGAA	TGCAGGAAAGTTAGGAAAGCTTGAATTCTCAAGCACTGAGATGCCAGGGATTTGTTTTACAGATCGGAA	chr6	283653757	1	2.79e-22	Plus	52:C>T	0	2	-	0	0	0	2	0	-	0	-	-	0	0	0	0	0	0	0	0	0	-	-	-	0	0	0	0	0	0	0	0	0	0	0	-	2	0	0	0
D13981	32610831	TGCAGGAGATGCCATTTCAAACTAAGAAAACTTGCAAGCAGAATAAATTTACAGATCGGAAGAGCGGTT	TGCAGGAGATGCCATTTCAAACTAAGAAAACTTACAAGCAGAATAAATTTACAGATCGGAAGAGCGGTT	chr5	810205314	1	5.87e-18	Minus	33:G>A	0	0	0	0	0	0	0	0	0	0	-	0	0	-	2	0	0	0	0	0	0	0	0	0	0	0	0	-	0	0	0	0	0	0	0	0	0	0	-	0
D13989	13868423	TGCAGGCAAATGTGAGGCAGTTATCATTCTCCAACTAGTGTCATAGTTTTTACAGATCGGAAGAGCGGT	TGCAGCCAAATGTGAGGCAGTTATCATTCTCCAACTAGTGTCATAGTTTTTACAGATCGGAAGAGCGGT	chr3	442076191	1	1.7e-18	Minus	5:G>C	0	-	0	0	0	0	-	0	0	0	0	0	0	0	0	-	0	0	0	0	0	0	0	0	0	0	0	0	0	0	0	0	-	0	0	0	0	0	0	2
D13998	3522022	TGCAGGCTGCAAGCTTGGACGCAATTGGATTGTTGATAAAGACCAATGCTTTACAGATCGGAAGAGCGG	TGCAGGCTGCAAGCTTGGACGCAATTGGATTGTTGATAAAAACCAATGCTTTACAGATCGGAAGAGCGG	chr5	30856697	1	4.91e-19	Minus	40:G>A	0	0	0	0	0	0	0	0	0	0	0	0	0	0	0	0	0	0	-	0	0	0	0	0	0	-	0	0	0	0	0	0	0	0	0	-	0	0	-	0
D14015	13911231	TGCAGGTCATCCATGGATAAAACACTATGAGGATACGAAAGTACCTTTGGATATTTTACAGATCGGAAG	TGCAGGCCATCCATGGATAAAACACTATGAGGATATGAAAGTACCTTTGGATATTTTACAGATCGGAAG	chr1L	1079847342	1	9.73e-22	Plus	6:T>C	0	0	-	0	0	0	-	0	0	0	-	-	0	-	0	-	0	0	-	0	-	0	0	0	0	0	0	0	0	0	-	0	0	0	0	0	0	0	0	-
D14019	3531401	TGCAGGTGCAGAATGGGACCTCAAAAATTCTTTACAGATCGGAAGAGCGGTTCAGCAGGAATGCCGAGA	TGCAGGTACAGAATGGGACCTCAAAAATTCTTTACAGATCGGAAGAGCGGTTCAGCAGGAATGCCGAGA	contig_7931	92398	1	6.2e-09	Plus	7:G>A	0	0	-	0	-	0	0	0	0	2	0	0	2	-	0	0	0	0	0	0	-	0	0	-	0	0	0	0	0	0	0	0	0	0	0	0	0	0	0	0
D14021	3531401	TGCAGGTGCAGAATGGGACCTCAAAAATTCTTTACAGATCGGAAGAGCGGTTCAGCAGGAATGCCGAGA	TGCAGGTGCAGCATGGGACCTCAAAAATTCTTTACAGATCGGAAGAGCGGTTCAGCAGGAATGCCGAGA	contig_7931	92402	1	6.2e-09	Plus	11:A>C	0	0	-	0	-	0	0	0	0	0	0	0	0	-	0	0	0	0	0	0	-	0	0	-	0	0	2	0	0	0	0	0	0	0	0	0	0	0	0	0
D14074	3519482	TGCAGTGCGACAACAGAAAGGAATGGTGAGTGGAAAAGTCAGATGATAATGTTACAGATCGGAAGAGCG	TGCAGTGCGACAACAGAACGGAATGGTGAGTGGAAAAGTCAGATGATAATGTTACAGATCGGAAGAGCG	chr1S	1237541596	1	1.42e-19	Plus	18:A>C	0	0	0	0	0	0	0	0	0	0	0	-	0	-	0	0	0	0	0	0	0	0	0	0	0	0	0	0	0	0	0	0	0	0	-	0	0	0	0	0
D14075	3519482	TGCAGTGCGACAACAGAAAGGAATGGTGAGTGGAAAAGTCAGATGATAATGTTACAGATCGGAAGAGCG	TGCAGTGCGACAACAGAAAGGAATCGTGAGTGGAAAAGTCAGATGATAATGTTACAGATCGGAAGAGCG	chr1S	1237541602	1	1.42e-19	Plus	24:G>C	0	0	0	0	0	0	0	0	0	0	0	-	0	-	0	0	0	0	0	0	0	0	0	0	0	0	0	0	0	0	0	0	0	0	-	0	0	0	0	0
D14088	3531602	TGCAGTTCATAATAATCATAAACAAGTGAGAAAACAAAAAGACAATTACAGATCGGAAGAGCGGTTCAG	TGCAGTTCATAATAATCATAAACAAGTGAGAAAACAAAAAGTCAATTACAGATCGGAAGAGCGGTTCAG	chr1S	289698946	1	2.5e-16	Minus	41:A>T	-	0	0	0	0	0	0	0	-	0	0	-	0	-	-	0	0	0	-	-	0	0	0	0	0	0	-	0	0	0	0	0	0	-	0	0	0	0	-	-
D14090	3517414	TGCAGTTCGTGTTGTAAGATCAACATTCTCTTACTTTTCTAGATTGGTTTTACAGATCGGAAGAGCGGT	TGCAGTTCGTGTTGTAAGATCAACATTCTCTTACTTTTCGAGATTGGTTTTACAGATCGGAAGAGCGGT	contig_8278	55020	1	1.7e-18	Minus	39:T>G	0	-	0	0	0	0	0	0	-	0	0	0	0	-	0	0	0	0	0	0	0	-	-	0	0	0	-	2	0	0	0	0	0	0	0	-	0	0	0	0
D14095	32610877	TGCAGTTCTTACATGGGCAGTTTTCCTGCTAGCTCAAGTATGTTACAGATCGGAAGAGCGGTTCAGCAG	TGCAGTTCTTACATGGGTAGTTTTCCTGCTAGCTCAAGTATGTTACAGATCGGAAGAGCGGTTCAGCAG	chr1L	1224053289	1	1.01e-14	Plus	17:C>T	0	-	0	0	0	0	0	0	0	-	-	0	0	0	0	0	2	0	-	0	1	0	0	-	0	0	0	0	0	0	0	0	-	0	0	-	0	0	0	0
D14101	13913125	TGCAGTTTACACTGCACTTGAGGATGATGCAAAAACTGTTACAGATCGGAAGAGCGGTTCAGCAGGAAT	TGCAGTTTATACTGCACTTGAGGATGATGCAAAAACTGTTACAGATCGGAAGAGCGGTTCAGCAGGAAT	chr3	1325530247	1	6.18e-11	Plus	9:C>T	0	0	0	1	0	0	0	0	0	2	0	0	1	0	0	-	1	0	2	0	0	0	0	0	1	0	0	-	0	0	0	2	2	-	-	0	0	0	-	-
D14102	18321663	TGCAGTTTACATCCTTCTCGGGAGCAAAATATGGAGGGAATGATTAGAACGAAAATTACAGATCGGAAG	TGCAGTTTACATACTTCTCGGGAGCAAAATATGGAGGGAATGATTAGAACGAAAATTACAGATCGGAAG	chr3	4827949	1	4.53e-20	Plus	12:C>A	0	0	0	-	0	0	0	0	-	2	0	0	-	0	0	0	0	0	1	0	0	-	0	0	0	0	2	-	0	0	0	0	-	0	0	0	0	0	-	-
D14103	18321663	TGCAGTTTACATCCTTCTCGGGAGCAAAATATGGAGGGAATGATTAGAACGAAAATTACAGATCGGAAG	TGCAGTTTACATCCTTCTCGGGAGCAAAATATGGAGAGAATGATTAGAACGAAAATTACAGATCGGAAG	chr3	4827973	1	4.53e-20	Plus	36:G>A	0	0	0	-	0	2	0	0	-	0	0	0	-	0	0	0	0	0	-	0	0	-	0	2	0	0	0	-	0	0	0	0	1	0	0	0	0	0	-	-
D14104	18321663	TGCAGTTTACATCCTTCTCGGGAGCAAAATATGGAGGGAATGATTAGAACGAAAATTACAGATCGGAAG	TGCAGTTTACATCCTTCTCGGGAGCAAAATATGGAGGGAATGATTCGAACGAAAATTACAGATCGGAAG	chr3	4827982	1	4.53e-20	Plus	45:A>C	0	0	0	-	0	0	0	0	-	0	0	0	-	0	0	0	0	0	-	0	0	-	0	0	0	0	0	-	0	0	0	0	-	0	0	0	0	0	-	-
D14181	3527924	TGCAGTAAATCTAGCATATCGATTATAAATCAATAATACCTATCGCAGAATTTTTACAGATCGGAAGAG	TGCAGTAAATCTAGCATATCGATTATAAATCAATAATACCTATCACAGAATTTTTACAGATCGGAAGAG	chr1S	400973287	1	1.18e-20	Minus	44:G>A	-	2	0	0	0	0	0	0	-	0	0	0	0	-	0	0	0	0	0	-	-	0	0	0	-	0	-	0	0	0	-	-	0	0	-	-	0	0	0	0
D14217	13906008	TGCAGTAATCGCATCATGCCGTGATTGCATGTCGCAAAAGAATGTAAAAAGAAAATTACAGATCGGAAG	TGCAGTAATCGCATCATGCCGTGATTGCATGTTGCAAAAGAATGCAAAAAGAAAATTACAGATCGGAAG	chr5	521924395	1	9.73e-22	Plus	32:C>T	0	0	0	0	0	0	-	1	0	0	0	0	0	0	0	1	0	0	1	0	0	0	0	0	0	0	-	0	0	0	0	0	0	-	-	-	0	0	0	0
D14262	3523163	TGCAGAAAAACTGAATGCAGATCCAATGGATGCAGATAACAACTTCGATGATAAAACAAAGAGTAGTGA	TGCAGAAAAACTGAATGCAGATCCAATGGATGCAGATAACAATTTCGATGATAAAACAAAGAGTAGTGA	chr2	1663502004	1	9.88e-28	Plus	42:C>T	0	0	-	0	0	0	0	0	-	0	0	0	0	-	0	0	0	0	0	0	-	2	-	0	0	0	0	-	0	0	0	0	0	0	0	0	0	0	0	0
D14266	22856486	TGCAGAAAATCAGAGCTCATGAACTTATGTTGTGTACACTTACAGGTCTAATCTCAAAATGAAGAAGCT	TGCAGAAAATCAGAGCTCATGAACTTATGTTGTGTACACTTACAGGTCTAATCTCAAAATAAAGAAGCT	chr3	1472691920	1	9.88e-28	Minus	60:G>A	0	0	0	0	0	0	0	0	0	0	0	0	0	0	0	0	0	0	0	0	0	0	0	0	0	0	-	0	0	0	0	-	0	-	0	-	0	0	0	0
D14281	13868220	TGCAGAAAGTTTTTGCAAACTGACATATACATGTTTGGAGCATTGAATTTATAGTGAATGTTTTACAGA	TGCAGAAAGTTTTAGCAAACTGACATATACATGTTTGGAGCATTGAATTTATAGTGAATGTTTTACAGA	chr3	1089861172	1	1.65e-25	Minus	13:T>A	0	-	0	0	0	0	0	0	0	0	0	0	0	0	0	-	0	0	0	0	0	0	0	0	0	0	-	0	0	0	-	0	0	1	0	0	0	0	0	0
D14286	3524129	TGCAGAAATTTATTGAAAGTGTCCCAAGAATTTTCCGCATAACGGTTACGTACATCTGGCAAATGAGAT	TGCAGAAATTTATTGAAAGTGTCCCAAGAATTTTCCGCATAACGGTTGCGTACATCTGGCAAATGAGAT	chr2	1265543727	1	9.88e-28	Plus	47:A>G	0	0	0	0	0	0	0	0	0	0	0	1	0	-	1	2	0	0	-	-	-	0	0	0	0	0	0	0	0	0	0	0	0	0	0	0	0	2	0	0
D14299	22856479	TGCAGAACATCTCATTTTGCGAATACCTTCAAGCGTTTCTTCCCAGCGAGCAGGTAATCCACCTATATC	TGCAGAACATCTCATTTTGCGAATAGCTTCAAGCGTTTCTTCCCAGCGAGCAGGTAATCCACCTATATC	chr6	276133939	1	9.88e-28	Minus	25:C>G	0	0	0	0	0	0	0	0	-	0	0	-	0	-	0	0	0	0	0	0	0	-	0	0	0	0	0	0	0	0	0	0	0	0	0	0	0	0	0	-
D14312	39963069	TGCAGAAGCAACTCTGGAAGCATTCTCCACAGTCCGGAGCAGTCTAATACCTTCTGCATTTGCTAAAAT	TGCAGAAGCAACTCTGGAAGCATTTTCCACAGTCCGGAGCAGTCTAATACCTTCTGCATTTGCTAAAAT	chr4	1227736727	1	9.88e-28	Plus	24:C>T	0	-	0	0	0	0	-	0	0	0	-	0	2	-	-	0	0	0	0	-	0	0	-	0	0	0	0	0	0	0	0	1	0	0	0	0	0	0	0	0
D14336	39981300	TGCAGAATTCCAAACATCATATAAACATCATTGCATAAGATAGAATGTCATGCAAAAGATTACAGATCG	TGCAGAATTCCAAACATCATATAAACATCATTGCAGAAGATAGAATGTCATGCAAAAGATTACAGATCG	contig_4921	177290	1	6.57e-24	Minus	35:T>G	0	0	0	0	0	0	0	0	0	0	-	0	0	0	0	0	0	0	0	0	0	0	0	0	0	0	0	0	0	0	0	0	0	0	0	0	0	0	0	0
D14357	3522744	TGCAGACATAACCGAACATGTTTCTTCGAAGGGGCTTCTTCAAAAGTGACAAAGCAAGCTGAAAACACT	TGCAGACATAACCGAACATGTTTCTTTGAAGGGGCTTCTTCAAAAGTGACAAAGCAAGCTGAAAGCACT	chr3	799629131	1	9.88e-28	Plus	26:C>T	0	0	0	0	0	0	0	0	0	0	-	0	0	0	0	0	0	0	-	0	0	0	0	0	0	-	0	0	0	0	0	0	0	0	0	0	0	0	-	0
D14390	3523105	TGCAGAGCTGACCTGAGTTACTGCTAGCAGATTTTTCGATATCAAGTCTTCCTGAAATAAAAGGAATCG	TGCAGAGCTGACCTGAGTTACCGCTAGCAGATTTTTCGATATCAAGTCTTCCTGAAATAAAAGGAATCG	chr5	801084667	1	1.28e-26	Minus	21:T>C	0	2	0	0	0	0	0	0	1	0	0	0	0	0	0	0	0	0	-	0	0	0	0	0	0	0	-	-	0	0	0	0	-	0	0	0	0	0	0	0
D14391	3523105	TGCAGAGCTGACCTGAGTTACTGCTAGCAGATTTTTCGATATCAAGTCTTCCTGAAATAAAAGGAATCG	TGCAGAGCTGACCTGAGTTACCGCAAGCAGATTTTTCGATATCAAGTCTTCCTGAAATAAAAGGAATCG	chr5	801084664	1	1.28e-26	Minus	24:T>A	0	0	0	0	0	0	0	0	-	0	0	0	0	0	0	0	0	0	-	0	0	0	0	0	0	0	-	-	0	0	0	0	-	0	0	0	0	0	0	0
D14395	39981054	TGCAGAGGTGGGTGTATATTTCATCTTAGTTTTGAAAGATTTGGGTTTTAGTTTCATTTCATTACAGAT	TGCAGAGGTGGGTGTATATTTCATCTTAGTTTTGAAAGATTTGGGTTTTAGTTTCATTTCATTAATGGT	chr3	0	1	5.37e-25	Plus	64:C>A	0	0	0	0	0	0	-	0	-	0	0	0	0	0	-	-	0	0	0	0	0	0	0	0	0	-	0	0	0	0	0	0	0	0	0	0	0	0	0	0
D14398	3519696	TGCAGAGTAAAAGATACAAGAAGTATCATCAGTTTTTACAAAACATCAAACCGCTCTTGTAAAATTTTT	TGCAGAGTAAAAGATACAAGAAGTATCATCAGTTTTTACACAACATCAAACCGCTCTTGTAAAAATTTT	chr2	1241480113	1	9.88e-28	Minus	64:T>A	0	0	0	0	0	0	-	0	0	0	-	0	0	0	0	0	0	0	0	0	0	-	-	0	0	1	-	-	0	-	0	0	0	0	-	0	-	0	0	0
D14421	39977201	TGCAGATAGATTGGTGTTTTCATGTGTACATGAAGAAAAATGATTCTGCAAATTTTTGGACTAGCTAGA	TGCAGATAGATTGGTGTTTTCATGTGTACAGGAAGAAAAATGATTCTGCAAATTTTTGGACTAGCTAGA	chr3	811582607	1	9.88e-28	Minus	30:T>G	0	-	0	0	0	0	0	0	0	0	0	0	0	-	0	0	0	0	0	0	0	0	0	0	0	0	0	-	0	0	0	0	0	-	-	-	0	0	0	-
D14422	39977201	TGCAGATAGATTGGTGTTTTCATGTGTACATGAAGAAAAATGATTCTGCAAATTTTTGGACTAGCTAGA	TGCAGATAGATTGGTGTTTTCATGTGTACAGGAAGAAAAATGATTCTGCAAATTTTTGGACTAGCTAGG	chr3	811582569	1	9.88e-28	Minus	68:A>G	0	-	0	0	0	0	0	0	0	0	0	0	0	-	0	0	0	0	0	0	0	0	0	0	0	0	0	-	0	0	0	0	0	-	-	-	0	0	0	-
D14432	3513762	TGCAGATCAGGTGAAGGTAAATCAGTGATGGATACCACGGATTCCTAGATTGGAACCAGACTCTGATAG	TGCAGATCAGGTGAAGGTAAATCAGTGATGGATACCAAGGATTCCTAGATTGGAACCAGACTCTGATAG	chr3	407408096	1	9.88e-28	Plus	37:C>A	0	-	0	0	0	2	0	0	2	-	0	0	0	0	-	0	0	0	0	0	0	0	0	0	1	0	0	0	0	0	0	0	0	0	0	0	0	0	0	2
D14451	22856638	TGCAGATGGGCATGTCCATGTTCTTGACTCATTCCGTGGTACACTTGTCCGTATCTTCCCTACTTTACT	TGCAGATGGACATGTCCATGTTCTTGACTCATTCCGTGGTACACTTGTCTGTATCTTCCCTACCTTACT	chr4	624123190	1	9.88e-28	Minus	63:T>C	0	0	0	0	0	0	0	0	0	0	0	0	0	-	0	0	0	0	0	0	0	0	-	0	0	0	0	0	0	0	0	0	0	0	0	-	0	0	0	-
D14484	39964816	TGCAGCAAATCAGAGTCGTCGCATGTGCAACGAATACAAAATCTTCACATAACAAGGCCAAAATTTTGA	TGCAGCAAATCAGAGTTGTCGCATGTGCAACGAATACAAAATCTTCACATAACAAGGCCAAAATTTTGA	chr5	491250311	1	9.88e-28	Plus	16:C>T	0	0	0	0	0	0	0	0	0	0	0	0	0	0	0	0	0	0	0	0	0	2	0	-	0	0	0	0	0	0	2	0	0	0	0	0	0	0	0	0
D14485	39964816	TGCAGCAAATCAGAGTCGTCGCATGTGCAACGAATACAAAATCTTCACATAACAAGGCCAAAATTTTGA	TGCAGCAAATCAGAGTCGTCGAATGTGCAACGAATACAAAATCTTCACATAACAAGGCCAAAATTTTGA	chr5	491250316	1	9.88e-28	Plus	21:C>A	0	0	0	0	0	0	0	0	0	0	0	0	0	0	0	0	0	0	0	0	0	0	0	1	0	0	0	0	0	0	0	0	0	0	0	0	0	0	2	0
D14486	39964816	TGCAGCAAATCAGAGTCGTCGCATGTGCAACGAATACAAAATCTTCACATAACAAGGCCAAAATTTTGA	TGCAGCAAATCAGAGTCGTCGCATGTGGAACGAATACAAAATCTTCACATAACAAGGCCAAAATTTTGA	chr5	491250322	1	9.88e-28	Plus	27:C>G	0	2	0	0	0	0	0	0	0	0	0	0	0	0	0	0	0	0	0	0	0	0	0	-	0	0	0	0	0	0	0	0	0	0	0	0	0	0	0	0
D14487	39964816	TGCAGCAAATCAGAGTCGTCGCATGTGCAACGAATACAAAATCTTCACATAACAAGGCCAAAATTTTGA	TGCAGCAAATCAGAGTTGTCGCATGTGCAACGAATACGAAATCTTCACATAACAAGGCCAAAATTTTGA	chr5	491250332	1	9.88e-28	Plus	37:A>G	0	0	0	0	0	0	0	0	0	0	0	0	0	0	0	0	0	0	0	0	0	0	0	-	0	0	0	0	0	0	0	0	0	0	0	0	0	0	0	0
D14498	39979039	TGCAGCAAGAGCAGGAGCAACCTTCCACGTAGCCATCAACATAGGATAATTCCTAAAACAACATTTGAT	TGCAGCAAGAGCGGGAGCAACCTTCCACGTAGCCATCAACATAGGATAATTCCTAAAACAACATTTGAT	chr4	1086135183	1	9.88e-28	Minus	12:A>G	0	0	0	0	0	0	0	0	0	0	0	0	0	0	0	0	0	0	0	0	0	0	0	0	0	0	0	0	0	2	0	-	-	0	0	-	0	-	-	0
D14502	32610354	TGCAGCAATAACTACACACATTACTGTCTTTTTGAACTGAAACAATGACTACAGTTTTGTCTATTCTTG	TGCAGCAATAACTACACACATTACTGGCTTTTTGAACTGAAACAATGACTACAGTTTTGTCTATTCTTG	chr3	1135248748	1	9.88e-28	Plus	26:T>G	0	0	0	0	0	0	-	0	0	-	0	0	0	-	-	0	0	0	-	0	-	0	0	0	0	0	0	0	0	0	0	0	0	0	1	2	0	-	-	0
D14509	3520117	TGCAGCAGAGGCCCTTCAACATCCTTTCTTCAAGGTTTTATTATTACTTGTTCATACTTTCATTTTTTT	TGCAGCAGAGGCCCTTCAACATCCTTTCTTCAAGGTTTTATTATTACTTGTTCATACTTTCATTTTACA	chr4	693043191	1	9.88e-28	Minus	66:T>A	2	0	0	0	0	0	-	0	0	0	-	0	-	-	0	-	0	0	-	0	0	0	0	0	1	0	0	0	0	0	0	1	-	0	-	0	2	0	0	-
D14533	3522786	TGCAGCATTTCCTAATGGACTTGAGGTATGCTGACAAAGAACGAAATCATCTGAAGAAACATAAAGATA	TGCAGCATTTCCTAATGGACTTGAGGTATGCCGACAGAGAACGAAATCATCTGAAGAAACATAAAGATA	chr6	238192289	1	9.88e-28	Plus	31:T>C	0	-	-	0	0	0	0	0	-	0	0	0	0	-	0	0	0	0	0	0	0	-	0	0	0	0	0	0	0	0	0	0	0	0	0	0	0	0	0	-
D14539	3521978	TGCAGCCAAGGACCGTAAACTTGAAGTAACTACTTTAGGTTTGGAAGTTTCTAGATAATAAGAAAACTA	TGCAGCCAAGGACCGTAAACTTGAAGCAACTACTTTAGGTTTGGATGTTTCTAGATAATAAGAAAACTA	chr2	1598552717	1	9.88e-28	Plus	26:T>C	0	-	1	0	1	0	0	0	0	0	0	-	0	-	0	0	0	0	0	0	0	0	0	0	0	-	0	-	0	2	0	-	0	-	0	0	0	0	0	0
D14541	3521978	TGCAGCCAAGGACCGTAAACTTGAAGTAACTACTTTAGGTTTGGAAGTTTCTAGATAATAAGAAAACTA	TGCAGCCAAGGACCGTAAACTTGAAGCAACTACTTTAGGTTTGGATATTTCTAGATAATAAGAAAACTA	chr2	1598552737	1	9.88e-28	Plus	46:G>A	0	-	-	0	-	0	0	0	0	0	0	-	0	-	0	0	0	0	0	0	0	0	0	0	0	-	0	-	0	0	0	-	0	-	0	0	0	0	0	0
D14553	3519130	TGCAGCCATTTTCACCCTCTCATTGGTCCGTCACACCTAGCTGTTGAGTTTTCATGTTTATGTATGAAC	TGCAGCCGTTTTCACCCTCTCATTGGTCCGTCACACCTAGCTGTTGAGTTTTCATGTTTATGTATGAAC	chr5	159796203	1	9.88e-28	Minus	7:A>G	0	-	0	-	0	0	0	0	-	0	0	0	0	0	0	0	0	0	0	0	0	0	-	0	0	0	0	0	0	0	0	0	0	0	-	0	-	0	1	0
D14590	3525162	TGCAGCTACACTTTATCAGGTACATTGGTCATGCAAATCTATCATTGATCATTCGAAGTTACATTGTTA	TGCAGCTACACTTTATCAGGTACATTGGTCATGCAAATCTATTATTGATCATTCGAAGTTACATTGTTA	chr3	406532379	1	9.88e-28	Minus	42:C>T	0	0	0	0	0	0	0	0	0	-	0	-	0	0	0	0	0	-	-	0	-	0	0	0	0	0	0	0	0	0	0	0	-	0	0	0	0	0	-	0
D14591	3525162	TGCAGCTACACTTTATCAGGTACATTGGTCATGCAAATCTATCATTGATCATTCGAAGTTACATTGTTA	TGCAGCTACACTTTATCAGGTACATTGGTCATGCAAATCTATCATTGATCATTCGAAGTTACACTGTTA	chr3	406532358	1	9.88e-28	Minus	63:T>C	0	0	0	0	0	0	0	0	0	-	0	-	0	0	0	0	0	-	-	0	-	0	0	0	0	0	0	0	0	0	0	0	-	0	0	0	0	0	-	0
D14594	13908915	TGCAGCTATGAGAGGAGGAGCCCAATCATTCATTGTAATAATCTCTCTCAAGTGGAAGAAAAAATGTTA	TGCAGCTATGAGAGGAGGAGCCCAATCATTCATTGTAATAATCTCTCTCGAGTAGAAGAAAAAATGTTA	chr5	70648155	1	9.88e-28	Plus	49:A>G	0	1	0	0	0	-	0	0	-	-	-	0	0	0	0	0	1	-	0	0	-	0	-	-	0	1	0	0	0	0	0	0	0	0	0	0	0	0	0	-
D14620	39977591	TGCAGCTGCTGTATGGACCTACAAACAATGTAGCGCATCTTATCTATCCTCTTGAAATTTTTCATTTTT	TGCAGCTGCTATATGGACCTACAAACAATGTGGCGCATCTTATCTATCCTCTTGAAATTTTTCATTTTT	chr4	1096699219	1	9.88e-28	Minus	10:G>A	0	0	0	0	0	0	0	0	0	0	0	0	0	-	0	0	0	0	-	0	-	0	0	0	0	-	0	-	0	0	-	0	0	0	0	0	0	0	0	0
D14621	39977591	TGCAGCTGCTGTATGGACCTACAAACAATGTAGCGCATCTTATCTATCCTCTTGAAATTTTTCATTTTT	TGCAGCTGCTGTGTGGACCTACAAACAATGTAGCGCATCTTATCTATCCTCTTGAAATTTTTCATTTTT	chr4	1096699217	1	9.88e-28	Minus	12:A>G	0	0	0	0	0	0	0	0	0	0	0	0	0	-	0	0	0	0	-	2	-	0	0	0	0	-	0	1	0	0	-	0	0	0	0	0	0	0	0	0
D14622	39977591	TGCAGCTGCTGTATGGACCTACAAACAATGTAGCGCATCTTATCTATCCTCTTGAAATTTTTCATTTTT	TGCAGCTGCTGTATGGACCTACAAACAATGTGGCGCATCTTATCTATCCTCTTGAAATTTTTCATTTTT	chr4	1096699198	1	9.88e-28	Minus	31:A>G	0	0	0	0	0	0	0	0	0	0	0	0	0	-	0	0	0	0	-	0	-	0	0	0	0	-	0	-	0	0	-	0	0	0	0	0	0	0	0	0
D14625	32609555	TGCAGCTGTTGAGAAAGATCATTCAGCTTCCTGCTTTCCCCTAAACTAAATCCATGAGGTGCACTTCCA	TGCAGCTGTTGAGAAAGATTATTCAGCTTCCTGCTTTCCCCTAAACTAAATCCATGAGGTGCACTTCCA	chr5	314929135	1	9.88e-28	Plus	19:C>T	0	0	0	-	0	0	0	0	0	0	1	0	2	0	0	0	0	0	0	0	0	0	0	0	1	-	-	0	0	0	0	0	-	0	2	1	0	0	-	0
D14626	3530954	TGCAGCTGTTTTGTTTATGGTGAAGGAAGAACTAGTAAAACAGACTCGATTTTTGCTCGGAAAGAATGT	TGCAGCTGTTTTGTTTATGGTGAAGGAAGAACTAGTAAAACAGACTCGATATTTGCTTGGAAAGAATGT	chr1L	341174518	1	9.88e-28	Minus	50:T>A	0	0	0	0	0	0	0	0	0	0	1	0	0	0	-	0	0	0	0	0	0	-	0	0	0	0	0	-	0	0	0	0	0	0	-	0	0	0	0	0
D14646	3521058	TGCAGCTTTGAAGCACAGTGTTCTGAGTGCTGGAGCACTTGCGGATATTGCCGATCATTGTAATGAGAG	TGCAGCTTTGAAGCACAGTGTTCTGAGTGCTGGAGCACTTGCTGATATTGCCGATCATTGTAATGAGAG	chr1L	34450570	1	9.88e-28	Minus	42:G>T	0	-	1	0	2	0	-	0	-	0	0	0	0	-	0	0	0	0	-	0	0	1	-	0	0	0	-	0	0	0	0	0	2	0	0	0	0	0	0	-
D14647	3521058	TGCAGCTTTGAAGCACAGTGTTCTGAGTGCTGGAGCACTTGCGGATATTGCCGATCATTGTAATGAGAG	TGCAGCTTTGAAGCACAGTGTTCTGAGTGCTGGAGCACTTGCGGATGTTGCCGATCATTGTAATGAGAG	chr1L	34450566	1	9.88e-28	Minus	46:A>G	0	-	-	0	0	0	-	0	-	0	0	2	0	-	0	0	2	0	-	0	0	-	1	0	0	0	-	0	0	0	0	0	0	0	0	0	0	0	0	-
D14695	3531621	TGCAGGCATAAATTCAGCATATTCTCTCCCTTCATCATTCTTGTGAAGCTGCAAAACAAGAGTTTACAG	TGCAGGCATAAATTCAGCTTATTCTCTCCCTTCATCATTCTTGTGAAGCTGCAAAACAAGAGTTTACAG	chr1L	633187748	1	4.6e-26	Plus	18:A>T	0	0	0	0	0	0	0	0	0	0	0	0	0	0	0	0	1	0	0	-	0	0	-	0	0	-	0	0	1	0	0	0	0	-	0	0	0	1	1	0
D14696	3531621	TGCAGGCATAAATTCAGCATATTCTCTCCCTTCATCATTCTTGTGAAGCTGCAAAACAAGAGTTTACAG	TGCAGGCATAAATTCAGCATATTCTCTCCCTTCATCATTCTTGTGAAGCTGCAAAACAAGAGTTTAACT	chr1L	0	1	4.6e-26	Plus	66:C>A	0	0	0	0	0	0	0	0	0	0	0	0	0	0	0	0	-	0	0	-	0	0	-	0	0	-	0	0	-	0	0	0	0	-	0	0	0	-	-	0
D14718	3523023	TGCAGGGAATTATTCAAATTTTCCAGAAAACATTGGTTGATTATTTTGACAGTAAGAAGTCTCAAATCA	TGCAGGGAATTATTCAAATTTTCCAGAAAACATTGGTTGATTATTTAGACAGTAAAAAGTCTCAAATCA	chr1L	1748479831	1	9.88e-28	Minus	46:T>A	0	0	-	0	0	0	0	-	-	0	-	0	0	0	0	-	-	0	0	0	0	0	0	0	0	0	0	0	0	0	0	0	0	0	0	0	0	0	-	0
D14723	32612116	TGCAGGGCTTGTGGACTCTTCAAGTTCGGGAATAAGCACGGGTGCGGTGGTTGGAATTGTGTTAGGAGC	TGCAGGGCTTGTGGACTCTTCAAGTTCGGGAATAAGCACGGGTGCAGTGGTTGGAATTGTGTTAGGAGC	chr1L	261372394	1	9.88e-28	Minus	45:G>A	0	0	-	0	0	0	0	0	-	0	0	-	0	-	0	0	0	0	0	0	0	0	0	0	0	0	0	-	0	0	0	0	0	0	1	-	0	0	0	0
D14724	32612116	TGCAGGGCTTGTGGACTCTTCAAGTTCGGGAATAAGCACGGGTGCGGTGGTTGGAATTGTGTTAGGAGC	TGCAGGGCTTGTGGACTCTTCAAGTTCGGGAATAAGCACGGGTGCGGTGGTTGGAATTGTGTTGGGAGC	chr1L	261372376	1	9.88e-28	Minus	63:A>G	0	0	-	0	0	0	0	0	-	2	0	-	0	-	0	0	0	0	0	0	0	0	0	0	0	0	0	-	0	0	0	0	0	0	-	-	0	0	0	0
D14758	13904852	TGCAGGTTCTTCAACAGTGGATCTGGAAGAGATTTACTTTGATTTTAGAAAACAATGTTTTGTTTATTC	TGCAGGTTCTTCAACAGTGAATCTGGAAGATATTTACTTTGATTTTAGAAAACAATGTTTTGTTTATTC	chr2	948643175	1	9.88e-28	Plus	19:G>A	0	0	-	0	0	0	0	0	0	0	0	-	0	0	-	0	0	2	0	1	0	0	0	0	0	0	0	0	0	0	0	0	0	2	0	-	0	2	0	0
D14778	13904875	TGCAGTAAGTGTGTAACTTGGACTGCAAGAAAACCAAATTCGGAAAAAAAGACTTCCATGCATCACTAG	TGCAGTAATTGTGTAACTTGGACTGCAAGAAAACCAAATTCGGAAAAAAAGACTTCCATGCATCACTAG	chr1S	1375222815	1	9.88e-28	Plus	8:G>T	0	0	-	0	0	0	0	0	0	0	-	0	0	-	-	0	0	0	0	0	0	0	0	0	0	0	0	0	-	0	0	0	0	0	0	0	0	-	0	0
D14779	13904875	TGCAGTAAGTGTGTAACTTGGACTGCAAGAAAACCAAATTCGGAAAAAAAGACTTCCATGCATCACTAG	TGCAGTAAGTGTGTAACTTGGACTGCAAGAAAACCAAATTCGGAAAAAAAGACTTACATGCATCACTAG	chr1S	1375222862	1	9.88e-28	Plus	55:C>A	0	0	-	0	0	0	0	0	0	0	-	0	0	-	1	0	0	0	0	0	0	0	0	0	0	0	0	0	-	0	0	0	0	0	0	0	0	-	0	0
D14785	32611723	TGCAGTAATAAAGTTTAGTGGAAAACCCACAGAAGATGTTGTTCTCGAAAAGGAGAAAATCTTGCGTTC	TGCAGTAATAAAGTTTAGTGGAAAACCCACAGAAGATGTTGTTCTCGAAAAGAAGAAAATCTTGCGTTC	chr1L	617262190	1	9.88e-28	Minus	52:G>A	0	0	0	0	0	0	0	0	0	0	0	0	0	0	0	0	0	0	-	0	0	0	0	0	0	-	-	0	0	0	0	0	0	0	-	1	0	0	0	0
D14801	3524249	TGCAGTAGAATTGCTCAAATGATCGGACTGTAGACAATGTTGGTACATGGTTCAACCAGTTGAATCGTC	TGCAGTAGAATTGCTCAAATGATCGGACTGTAGGCAATGTTGGTACATGGTTCAACCAGTTGAATTGTC	chr1S	880207513	1	9.88e-28	Plus	33:A>G	0	0	0	0	0	0	0	0	-	0	0	0	0	0	-	0	0	0	0	0	0	0	0	0	0	0	0	0	0	0	-	0	0	-	0	0	0	-	-	-
D14802	3524249	TGCAGTAGAATTGCTCAAATGATCGGACTGTAGACAATGTTGGTACATGGTTCAACCAGTTGAATCGTC	TGCAGTAGAATTGCTCAAATGATCGGACTGTAGACAATGTTTGTACATGGTTCAACCAGTTGAATCGTC	chr1S	880207521	1	9.88e-28	Plus	41:G>T	0	0	0	2	0	0	0	0	-	2	0	0	0	0	-	0	0	0	0	0	0	0	0	0	0	0	0	0	0	0	-	0	2	-	0	0	0	-	-	-
D14815	39980989	TGCAGTAGGTGTTGGAACTGTAGGATCATCAGAGGCAATAATGTTAGCTGGTTTAGCTTTTACAGATCG	TGCAGTAGGTGTTGGAACTGTAGGCTCATCAGAGGCAATAATGTTAGCTGGTTTAGCTTTTACAGATCG	chr1S	587539964	1	6.57e-24	Minus	24:A>C	0	0	0	0	0	0	0	0	0	-	0	0	0	0	0	0	0	0	-	0	0	0	-	0	0	0	0	-	0	0	0	1	-	0	0	-	0	0	-	0
D14821	3521669	TGCAGTAGTTCTTCAACTATATCCTTTGCGTTTGTAACATCACACATGCCATAAAGCAAATCTAGAGCA	TGCAGTAGTTCTTCAACTATATCCTTTGCATTTGTAACATCACACATGCCATAAAGCAAATCTAGAGCA	chr1S	426880971	1	9.88e-28	Plus	29:G>A	0	0	0	-	0	-	0	0	-	1	0	-	0	-	0	0	0	0	0	0	-	0	2	0	0	0	0	-	0	0	-	-	1	0	0	1	0	0	0	2
D14839	13904926	TGCAGTCACAATTTGACTGAAGAAGAAGGTGAAGAACTGAGACGGATGCGATATGAAGTCGGTCACTGG	TGCAGTCACAATTTGACTGAAGAAGAAGGTGAAGAACTGAGACGGATGCAATATGAAATCGGTCACTGG	chr4	1424603251	1	9.88e-28	Plus	49:G>A	0	0	0	0	0	0	0	0	0	0	0	0	0	0	0	0	0	0	0	0	0	0	0	0	0	0	0	0	0	0	0	0	0	0	0	0	0	0	0	-
D14840	13904926	TGCAGTCACAATTTGACTGAAGAAGAAGGTGAAGAACTGAGACGGATGCGATATGAAATCGGTCACTGG	TGCAGTCACAATTTGACTGAAGAAGAAGGTGAAGAACTGAGACGGATGCGATATGAAGTCGGTCACTGG	chr4	1424603259	1	4.6e-26	Plus	57:A>G	1	1	1	1	1	1	2	1	1	1	1	1	2	1	1	1	1	1	1	1	1	1	1	1	1	1	1	1	1	1	1	1	1	1	1	1	1	1	1	-
D14871	3520477	TGCAGTGAGTCCTGTCCGGGATAAGGCGATGACTTGAATGAAGACTTCTTGCTCCAAATGTACGAACCA	TGCAGTGAGTCCTGTCCGGGATAAGGCGATGACTTGAATGAAGACTTCTTGCTCCAAACGTACGAACCA	chr4	1024683096	1	9.88e-28	Minus	58:T>C	0	0	0	0	2	0	0	0	0	0	0	0	0	0	0	0	0	0	0	0	0	0	0	0	0	1	-	0	0	0	0	0	0	0	0	-	0	0	2	0
D14882	39980234	TGCAGTGGTGATGAGCATTGTCACATTCTTCTATGCCTGTTCTTTCTTGTAAGTTATTCATTGAAATTG	TGCAGTGGTGATGAGCATTGTCACATTCTTCTATGCCTGTTCTTTTTTGTAAGTTATTCATTGAAATTG	chr6	741310071	1	4.6e-26	Minus	45:C>T	0	0	0	0	0	0	0	0	0	0	0	0	0	0	0	0	0	0	0	0	0	0	0	0	0	0	0	0	0	0	0	0	0	0	0	-	0	0	0	0
D14883	22857475	TGCAGTGGTGGGGAAGCTTTCACAAAAGGTTTCACTTCGAGCACTAATTCATAGAGTACAGAGTAAACA	TGCAGTGGTGGGGAAGCTTTCACAAAAGGTTTCACTTCAAGCACTAATTCATAGAGTACAGAGTAAACA	chr4	1020430662	1	9.88e-28	Plus	38:G>A	0	0	0	-	0	0	0	0	0	0	0	0	0	-	0	0	0	0	0	0	0	0	0	0	0	0	0	0	0	0	0	0	-	0	0	0	0	0	-	0
D14886	32611756	TGCAGTGGTGGTGGCTATCTAGCTTTATCATCTGAGGACTATTTTCAAATCATCCCGAGACAGCACGTG	TGCAGTGGTGGTGGCTATCTAGCTTTATCATCTGAGTACTATTTTCAAATCATCCCGAGACAGCACGTG	chr3	1089862413	1	4.6e-26	Minus	36:G>T	0	0	0	0	0	0	0	-	-	-	0	0	0	0	-	-	0	0	0	0	-	0	-	0	0	0	0	0	0	0	0	0	-	1	0	-	0	-	0	-
D14894	3527888	TGCAGTGTGAGAAATATCTTTGATTGTGATCAATTGCCATTGCTTTGAGTATAATTATTTTTACAGATC	TGCAGTGTGAGAAATATCTTTGATTGTGATCAATTGCCATTGCTTTGAGTATAATAATTTTTACAGATC	chr6	972145200	1	1.88e-24	Minus	55:T>A	0	0	2	2	2	0	-	0	0	0	0	1	0	-	-	-	0	0	1	0	0	2	0	-	0	0	0	0	-	0	1	0	0	0	0	0	0	0	1	-
D14904	39974637	TGCAGTTAGCTTTCCAGAATACACTCTGAGAAACGTGAGGGAGCCTACAAATGAATCACTCATGATCTT	TGCAGTTAGCTTTCCAGAATACACTCTGAGAAATGTGAGGGAGCCTACGAATGAATCACTCATGATCTT	contig_6566	182733	1	9.88e-28	Plus	33:C>T	0	-	1	0	0	0	0	0	-	0	0	0	0	-	0	0	0	0	0	-	0	0	0	-	0	0	-	0	0	0	-	0	0	0	0	0	0	0	0	-
D14923	3524277	TGCAGTTCGTGATTTGGAGAAGAATTGCCGTAACTCTTCTTATGCTGGCTGCACCAATTGTCTTGCTGC	TGCAGTTCGTGATTTGGAGAAGAATTGCCGTAGCTCTTCTTATGCTGGCTGCACCAATTGTCTTGCTGC	chr1S	335349677	1	4.6e-26	Plus	32:A>G	0	0	0	0	0	0	0	0	0	-	0	0	0	-	-	0	0	0	0	0	0	0	0	0	0	0	0	0	0	0	0	0	-	-	0	0	0	0	0	-
D14925	3524277	TGCAGTTCGTGATTTGGAGAAGAATTGCCGTAACTCTTCTTATGCTGGCTGCACCAATTGTCTTGCTGC	TGCAGTTCGTGATTTGGAGAAGAATTGCCGTAACTCTTCTTATGCTGGCTGCACCAATAGTCTTACTGC	chr1S	335349703	1	4.6e-26	Plus	58:T>A	0	0	0	0	0	0	0	0	0	-	0	0	0	-	-	0	0	0	0	0	0	0	0	0	0	0	0	0	0	0	0	0	-	-	0	0	0	0	0	-
D14926	39980148	TGCAGTTCTGTTACTTAGCTTATGAGATTCAAATATTATGGTTTTCTCTCAATTCTCCTAATAGTTTTT	TGCAGTTCTGTTACTTAGCTTATGAGATTCAAATATTATGGTTTTCTCTCTATTCTCCTAATAGTTTTT	chr6	290489605	1	9.88e-28	Plus	50:A>T	0	0	1	0	0	0	0	0	0	0	0	0	0	0	-	0	0	0	0	-	0	0	0	0	0	-	0	-	0	0	0	0	0	-	-	-	0	-	-	-
D14934	13909186	TGCAGTTGGAGTTGAAGCTTCTCATCCAATTTTGGAGGTAAGCATAATCAGCTAGTTCTGTCCGGTTTT	TGCAGTTGGAGTTGAAGCTTCTCATCCAATTTTGGAGGTAAGCATAATCAGCTAGTTTTGTCCGGTTTT	chr1S	1223711120	1	9.88e-28	Minus	57:C>T	0	0	0	0	0	0	-	0	0	0	-	2	0	0	-	0	0	0	0	-	0	0	-	-	0	0	0	0	0	0	0	0	0	0	0	0	0	0	2	-
D14943	32611781	TGCAGTTTCTCTGTTTTCATGTTGACAACGCTATACATAAACGCAGTTCCAAACATACCATAAATTACA	TGCAGTTTCTCTGTTTTCATGTTGACTCCGCTATACATAAACGCAGTTCCAAACATACCATAAATTACA	chr4	7972755	1	1.28e-26	Minus	26:A>T	-	0	-	0	0	0	0	0	0	0	0	0	0	0	0	0	0	0	0	0	0	0	0	0	0	0	0	-	0	0	0	0	0	-	0	-	0	0	0	0
D14944	32611781	TGCAGTTTCTCTGTTTTCATGTTGACAACGCTATACATAAACGCAGTTCCAAACATACCATAAATTACA	TGCAGTTTCTCTGTTTTCATGTTGACAACGCTATACATAAACTCAGTTCCAAACATACCATAAATTACA	chr4	7972739	1	1.28e-26	Minus	42:G>T	-	0	-	0	0	0	0	0	0	0	0	0	0	0	0	0	0	0	0	0	0	0	0	0	0	0	0	-	0	0	0	2	0	-	0	-	0	0	0	0
D14983	13866364	TGCAGACACTGTAATTCTTGCCAGAACTCAAAGAAACAACTTGAAAGGGTTTGTGGGGTTGAAATTTTA	TGCAGACACTGCAATTCTTGCCAGAACTCAAAGAAACAACTTGAAAGGGTTTTTGGGGTTGAAATTTTA	chr1L	319819356	1	9.88e-28	Plus	11:T>C	0	0	0	0	0	0	0	0	0	0	0	0	0	0	0	0	0	-	0	-	0	0	-	0	0	0	0	0	0	-	0	0	0	-	0	0	0	0	0	0
D14984	13866364	TGCAGACACTGTAATTCTTGCCAGAACTCAAAGAAACAACTTGAAAGGGTTTGTGGGGTTGAAATTTTA	TGCAGACACTGTAATTCTTGCCAGAACTCAAAGAAACAACTTGAAAGGGTTTTTGGGGTTGAAATTTTA	chr1L	319819397	1	9.88e-28	Plus	52:G>T	0	0	0	0	0	0	0	0	0	0	0	0	0	0	0	0	0	-	0	-	0	0	-	0	0	0	0	0	0	-	0	0	0	-	0	0	0	0	0	0
D14985	13866364	TGCAGACACTGTAATTCTTGCCAGAACTCAAAGAAACAACTTGAAAGGGTTTGTGGGGTTGAAATTTTA	TGCAGAAACTGTAATTCTTGCCAGAACTCAAAGAAACAACTTGAAAGGGTTTGTGGGGTTGAAATCTTA	chr1L	319819410	1	9.88e-28	Plus	65:T>C	0	0	0	0	0	0	0	0	0	0	0	0	0	0	0	0	0	1	0	-	0	0	-	0	0	0	0	0	0	-	0	0	0	-	0	0	0	0	0	0
D15007	18320284	TGCAGATGTAAATCCGGTGACACATTCCCGACAATCACACGTGCATGAATCAATCTCCCACAAAAACAA	TGCAGATGTAAATCCGGTGACACATTCCCGACAATCACATGTGCATGAATCAATCTCCCACAAAAACAA	chr1L	1072152862	1	9.88e-28	Plus	39:C>T	0	0	0	-	0	0	0	0	-	1	0	0	0	0	0	-	2	0	-	0	0	0	1	0	0	0	0	0	0	0	0	0	0	-	0	-	0	0	0	-
D15008	18320284	TGCAGATGTAAATCCGGTGACACATTCCCGACAATCACACGTGCATGAATCAATCTCCCACAAAAACAA	TGCAGATGTAAATCCGGTGACACATTCCCGACAATCACACGTGCATGAATCAATCTCCCACAAAAATAA	chr1L	1072152889	1	9.88e-28	Plus	66:C>T	0	0	2	-	2	0	0	0	-	-	0	0	0	0	0	-	0	0	-	0	0	0	-	0	0	0	0	0	2	0	2	0	0	-	0	-	0	0	2	-
D15065	3507710	TGCAGGCCAAACGATGTATGTGACAAAAGAGAACAAGCTTTTGTTGAGTAATTTTTATGTCTTTGTCGA	TGCAGGCCAGACGATGTATGTGACAAAAGAGGACAAGCTTTTGTTGAGTAATTTTTATGTCTTTGTCGA	chr4	269454894	1	9.88e-28	Plus	9:A>G	-	-	0	-	0	0	0	0	0	0	-	0	0	-	0	0	0	0	0	-	-	-	-	0	0	0	0	-	0	0	-	0	0	-	-	-	0	0	0	-
D15066	3507710	TGCAGGCCAAACGATGTATGTGACAAAAGAGAACAAGCTTTTGTTGAGTAATTTTTATGTCTTTGTCGA	TGCAGGCCAAACCATGTATGTGACAAAAGAGAACAAGCTTTTGTTGAGTAATTTTTATGTCTTTATCGA	chr4	269454897	1	9.88e-28	Plus	12:G>C	1	-	0	-	0	0	0	0	0	0	-	0	2	-	0	0	0	0	0	-	-	-	-	0	0	0	0	-	0	0	-	0	0	-	-	-	0	0	0	-
D15232	13909518	TGCAGAAGAGTCTGAAGAAAAGGAACAGCTGCTAGAGCAGGTAAGCAATTTTGTTTTTACAGATCGGAA	TGCAGAAGAGTCTGAAGAAAAGGAACAACTGCTAGAGCAGGTAAGCAATTTTGTTTTTACAGATCGGAA	contig_8614	45812	1	2.79e-22	Minus	27:G>A	0	0	0	0	0	0	0	0	0	0	-	-	0	0	0	0	0	-	0	0	0	0	0	0	0	-	0	0	0	0	0	0	0	0	-	-	0	0	0	-
D15316	3507964	TGCAGCATCCTGATAACAAAGCACAGCTCAATAGATAATGAAGAAAACTTTTACAGATCGGAAGAGCGG	TGCAGCATCCTGATAACAAAGCACAGCTCAATATATAACGAAGAAAACTTTTACAGATCGGAAGAGCGG	chr1L	849199606	1	4.91e-19	Plus	33:G>T	0	0	0	0	0	0	2	1	0	0	0	0	0	-	0	-	0	0	0	0	0	0	0	0	0	1	0	0	0	2	0	-	0	0	0	0	0	0	0	0
D15331	3525605	TGCAGCGTTTGATTTTATATGACAAGTTCCAAAATAAAAATTACAGATCGGAAGAGCGGTTCAGCAGGA	TGCAGTGTTTGATTTTATATGACAAGTTCCAAAATAAAAATTACAGATCGGAAGAGCGGTTCAGCAGGA	contig_9997	28974	1	1.16e-13	Plus	5:C>T	0	0	-	0	0	2	0	0	-	0	0	0	0	0	0	2	0	0	-	0	0	0	0	0	0	0	0	0	0	0	-	0	0	0	2	0	0	0	0	1
D15361	3520318	TGCAGGAGATACTCTCGGACAGATAGCTTCACACAAGGCAGGAATTTTTACAGATCGGAAGAGCGGTTC	TGCAGGAGATACTCTCGGACAGATAGCTTCACACAAGACAGGAATTTTTACAGATCGGAAGAGCGGTTC	chr3	105027916	1	2.11e-17	Plus	37:G>A	0	0	-	0	1	0	2	0	1	1	0	-	0	2	2	0	0	0	0	0	0	0	0	0	0	-	0	0	0	0	0	0	0	0	0	0	0	0	0	0
D15362	3523451	TGCAGGAGTGGAAGGAGAAAGGAGAAGACCAATCACTATTTTGATTTTTTTTACAGATCGGAAGAGCGG	TGCAGAAGTGGAAGGAGAAAGGAGAAGACCAATCACTATTTTGATTTTTTTTACAGATCGGAAGAGCGG	chr5	159796212	1	2.29e-17	Plus	5:G>A	0	0	0	0	0	0	2	0	0	-	0	0	0	-	0	0	0	0	0	0	0	-	0	0	0	0	0	-	2	0	0	0	0	0	-	0	0	0	0	0
D15365	13911987	TGCAGGATGAAGCAAAAAAAAATTGCATATAAAGGCCTCACAAATTGTTTTACAGATCGGAAGAGCGGT	TGCAGGGTGAAGCAAAAAAAAATTGCATATAAATGCCTCACAAATTGTTTTACAGATCGGAAGAGCGGT	chr5	1224360196	1	1.7e-18	Minus	33:G>T	0	0	0	0	0	0	0	-	0	0	0	0	0	0	0	-	0	-	-	0	0	0	0	0	0	0	0	0	0	0	0	0	0	1	-	0	-	0	0	0
D15366	13911987	TGCAGGATGAAGCAAAAAAAAATTGCATATAAAGGCCTCACAAATTGTTTTACAGATCGGAAGAGCGGT	TGCAGGATGAAGCAAAAAAAAATTGCATATAAAGGCCTTACAAATTGTTTTACAGATCGGAAGAGCGGT	chr5	1224360191	1	1.7e-18	Minus	38:C>T	0	0	0	0	0	0	0	1	0	2	0	0	0	0	0	1	0	1	-	2	0	0	0	2	0	0	0	0	0	0	0	2	0	-	-	2	-	0	0	2
D15397	3527335	TGCAGTACACAATCATCTCACATTGGTTCGTGCATGGTCATATGTTTTTTTACAGATCGGAAGAGCGGT	TGCAGTACACAATCATTTCACATTGGTTCGTGCACGGTCATATGTTTTTTTACAGATCGGAAGAGCGGT	chr2	851151979	1	1.7e-18	Minus	16:C>T	0	-	0	0	0	0	0	2	0	-	0	0	0	0	0	0	0	0	0	0	0	0	0	0	1	-	0	-	0	0	0	0	0	0	0	-	0	0	0	0
D15406	3519257	TGCAGTATACAAGATAAATCAAGGCAGATCGTGATACGTCGATATTTCTTTTTACAGATCGGAAGAGCG	TGCAGTATACAAGATAAATCAAGGCAGATCGTAATACGTCGATATTTCTTTTTACAGATCGGAAGAGCG	chr5	804883087	1	6.6e-18	Minus	32:G>A	0	0	0	0	2	2	0	0	0	0	0	0	0	0	0	-	0	0	0	-	0	0	0	0	0	-	-	-	0	0	0	0	0	-	0	0	0	-	1	0
D15412	32609143	TGCAGTCAAATTGAATAGTAAGAAGGACAAAAAGAGACAAGATAATGTAAATAAATTTTACAGATCGGA	TGCAGTCAAATTGAATAGTAAGAAGGACAAAAAGAGAAGAGATAATGTAAATAAATTTTACAGATCGGA	chr4	1337011961	1	8.01e-23	Minus	37:C>A	0	0	0	0	0	0	0	0	0	0	0	0	0	0	0	0	0	0	0	0	0	0	0	0	0	0	-	0	0	0	0	0	0	-	0	0	0	0	0	-
D15494	18320650	TGCAGGTCGGCCAGAATCCGGCTGTTCTGGCAGTGGTGGCATCAATTACAGATCGGAAGAGCGGTTCAG	TGCAGGTCGGCCAGAATCCGGATGTTCTGGCAGTGGTGGCATCAATTACAGATCGGAAGAGCGGTTCAG	chr3	1210879169	1	2.5e-16	Minus	21:C>A	0	-	0	0	0	0	0	0	0	0	-	0	0	-	1	0	0	0	0	0	-	0	0	-	0	-	0	0	0	0	0	0	-	0	0	-	0	0	0	0
D15495	18320650	TGCAGGTCGGCCAGAATCCGGCTGTTCTGGCAGTGGTGGCATCAATTACAGATCGGAAGAGCGGTTCAG	TGCAGGTCGGCCAGAATCCGGCTGTTTTGGCAGTGGTGGCATCAATTACAGATCGGAAGAGCGGTTCAG	chr3	1210879164	1	2.5e-16	Minus	26:C>T	0	-	0	0	0	0	0	0	0	0	-	0	0	-	-	0	0	0	0	0	-	0	0	-	0	-	0	0	0	0	0	0	-	0	0	-	0	0	0	0
D15551	13868934	TGCAGAAAAATGTCTGTAGTTGAGTCCTAATTTCTTGGTGAATGATGATAATAACTGAATTTATTACAG	TGCAGCAAAATGTCTGTAGTCGAGTCCTAATTTCTTGGTGAATGATGATAATAACTGAATTTATTACAG	chr5	629205737	1	4.6e-26	Plus	5:A>C	0	-	-	0	0	0	0	0	-	0	-	0	0	0	0	-	0	0	0	0	0	0	0	0	0	0	0	-	0	0	0	0	0	0	0	0	0	0	0	0
D15556	3512861	TGCAGAAAAGAAGGAGGATGCCACGAAAAGCAAAAAGGCAAGTTTCACCTAACAATACTCCTTTACAGA	TGCAGAAAAGAAGGAGGATGCCACGAAAAGCAAAAAGGCAAGTTTCACCTAACAATACTCCTTTAACCA	chr1L	0	1	1.65e-25	Minus	67:G>C	0	-	0	0	0	0	0	0	-	-	0	0	0	0	0	0	0	0	0	0	0	0	0	0	0	-	0	0	0	-	0	0	-	0	0	-	0	0	0	0
D15570	3528062	TGCAGAAATACTTCAATATCCTCATTATCTGAATTGTTCTATTCTTGCCAACAAATCTTTACAGATCGG	TGCAGAAATACTTCAATATCCTCATTATCTGAATTCTTCTATTCTTGCCAACAAATCTTTACAGATCGG	chr1S	827561822	1	2.29e-23	Minus	35:G>C	0	0	-	0	-	0	0	-	1	0	1	0	0	2	2	2	0	0	0	0	0	0	0	0	1	-	0	0	0	0	1	0	0	0	0	1	0	2	0	0
D15571	3528062	TGCAGAAATACTTCAATATCCTCATTATCTGAATTGTTCTATTCTTGCCAACAAATCTTTACAGATCGG	TGCAGAAATACTTCAATATCCTCATTATCTGAATTGTTCTATTCTTGCCAACAAATTTTTACAGATCGG	chr1S	827561801	1	2.29e-23	Minus	56:C>T	0	0	-	0	1	0	0	-	-	0	-	2	2	0	0	0	0	0	0	0	0	0	0	0	-	1	0	0	0	0	1	2	0	0	0	-	0	0	0	0
D15575	32611493	TGCAGAACAGGAGAAATAGTTAGAGGGAGGATCAACAGTTCAGATAAGTAATAGAAAGATGCCAGCTCA	TGCAGAAAAGGAGAAATAGTTAGAGGGAGGATCAACAGTTCAGATAAGTAATAGATAGATGCCAGCTCA	chr4	1264269240	1	9.88e-28	Minus	7:C>A	0	0	0	0	0	0	0	0	0	0	0	0	0	0	0	0	0	0	-	0	0	0	0	0	0	-	0	0	0	2	2	0	0	0	0	-	0	0	-	0
D15576	32611493	TGCAGAACAGGAGAAATAGTTAGAGGGAGGATCAACAGTTCAGATAAGTAATAGAAAGATGCCAGCTCA	TGCAGAAAAGGAGAAATAGTTAGAGCGAGGATCAACAGTTCAGATAAGTAATAGATAGATGCCAGCTCA	chr4	1264269222	1	9.88e-28	Minus	25:G>C	0	0	0	0	0	0	0	0	0	0	0	0	0	0	0	0	0	0	-	0	0	0	0	0	0	-	0	0	0	0	0	0	0	0	0	-	0	0	-	0
D15577	32611493	TGCAGAACAGGAGAAATAGTTAGAGGGAGGATCAACAGTTCAGATAAGTAATAGAAAGATGCCAGCTCA	TGCAGAACAGGAGAAATAGTTAGAGGGAGGATCAACAGTTCAGATAAGTACTAGAAAGATGCCAGCTCA	chr4	1264269197	1	9.88e-28	Minus	50:A>C	0	0	0	0	0	0	0	0	0	0	0	0	0	0	0	0	0	0	-	0	0	0	0	0	0	-	0	0	0	0	0	0	0	0	0	-	0	0	-	0
D15588	13864680	TGCAGAACGACAGCACTTGTTAGACAAGAAAACAAAACTTTTGTCCATGCTGGATGAGGTAAACTGTTA	TGCAGAACGACAGCACTTGTTAGACAAGAAAACAAAACTTTTGTCCATGCTGGATGAGGTATACTGTTA	chr3	1601281372	1	9.88e-28	Plus	61:A>T	0	0	0	0	0	0	0	0	0	0	-	0	0	0	0	0	0	0	0	0	0	0	0	0	0	0	0	0	0	0	-	0	0	0	0	0	0	0	0	0
D15596	22857662	TGCAGAAGAGTTCGTTGAAGAGATCGTGATAACATCTATCGATCTTCGTAGCGAATTCCCTACAATGTT	TGCAGAAGAGTTCGTTGAAGAGATCGTGATAACATCTATCGATCTTCGTAGCGAATTTCCTACAATGTT	chr2	771261850	1	9.88e-28	Plus	57:C>T	0	0	0	0	-	0	0	-	0	0	0	-	0	0	-	0	0	0	0	-	0	0	0	0	0	0	0	-	0	0	0	0	0	-	0	-	0	0	-	0
D15603	13908668	TGCAGAAGCTAATGAAGCTGATGGGTTTAGAGATTTAGTTCAGCATAACACGTTTTGTTTTACAGATCG	TGCAGAAGCTAATGAAGCTGATGGGTTTAGATATTTAGTTCAGCATAACACGTTTTGTTTTACAGATCG	chr1L	1307169976	1	6.57e-24	Minus	31:G>T	0	0	-	0	0	0	0	0	0	0	1	0	0	-	0	0	2	0	0	0	-	0	0	0	0	2	0	0	0	0	0	0	1	0	0	1	0	0	0	0
D15604	13908668	TGCAGAAGCTAATGAAGCTGATGGGTTTAGAGATTTAGTTCAGCATAACACGTTTTGTTTTACAGATCG	TGCAGAAGCTAATGAAGCTGATGGGTTTAGAGATTTAGTTCAGCATAACAGGTTTTGTTTTACAGATCG	chr1L	1307169957	1	6.57e-24	Minus	50:C>G	0	0	-	0	0	0	0	0	0	0	-	0	0	-	0	0	0	0	0	0	-	0	0	0	0	0	0	0	0	0	0	0	-	0	0	-	0	0	0	0
D15618	3520337	TGCAGAAGTGTAATTCATTTTCATAGGACTTTCTGCTTTTGGAGACCAACAAAATACATTTGAAGTGGT	TGCAGAAGTGTAATTCATTTTCATAGGACTTTCTGCTTTTGGAGACCAACAAAACTCATTTGAAGTGGT	chr4	1627254322	1	9.88e-28	Plus	55:A>T	0	0	-	-	0	0	0	0	-	-	-	0	0	0	0	0	0	0	0	0	0	0	0	0	0	-	0	0	0	0	-	0	0	0	0	0	0	-	0	-
D15651	3519834	TGCAGACTAGTGTGAAGAGTACCTTGTGGCCATATCTGGGTAACCTTTGGCAGTGATAAGAATGCTTGG	TGCAGACTCGTGTGAAGAGTACCTTGTGGCCATATCTGGGTAACCTTTGGCAGTGATAAGAATGCTTGG	chr1L	1216812493	1	9.88e-28	Plus	8:A>C	0	0	0	0	0	0	-	0	0	0	-	0	0	-	0	0	-	0	-	-	-	2	0	0	0	0	0	0	-	0	0	0	0	0	0	0	0	0	0	-
D15666	39980959	TGCAGAGAAAATTCTGGACATTTTTTCCTCAGCTTCTATCATAGATCCAGAATTCTCAGGCATTACAGA	TGCAGAGAAAATTCTGGACATTTTTTCCTCAGCTTCTATCATAGATCCAGAATTCTCAGGCATTAATTA	chr2	0	1	1.65e-25	Plus	66:A>T	0	0	0	0	0	0	0	0	0	0	1	0	0	0	0	0	0	0	-	0	0	0	0	0	0	0	0	-	0	0	-	0	0	0	0	0	0	0	0	-
D15667	39980959	TGCAGAGAAAATTCTGGACATTTTTTCCTCAGCTTCTATCATAGATCCAGAATTCTCAGGCATTACAGA	TGCAGAGAAAATTCTGGACATTTTTTCCTCAGCTTCTATCATAGATCCAGAATTCTCAGGCATTAAATG	chr2	0	1	1.65e-25	Plus	67:G>T	0	0	0	0	0	0	0	0	0	0	-	0	0	0	0	0	0	0	-	0	0	0	0	0	0	0	0	-	0	0	-	0	0	0	0	0	0	0	0	-
D15679	3522839	TGCAGAGATAAAAATCAAATTCTGTCGGATGACAAATTTTGGTGTCGACAACAGTCCCTGAAAGACAAA	TGCAGAGATAAAAATCAAATTCTGTCGGATGACAAATTTTGGTGTCGACAACAGTCCCTGAAATACAAA	chr1L	385139472	1	9.88e-28	Minus	63:G>T	-	0	0	0	0	0	0	0	0	0	0	0	0	0	0	0	0	0	0	0	0	0	0	-	-	1	0	-	-	-	0	0	0	-	0	0	0	0	-	0
D15691	3522185	TGCAGAGCTCTTTACCGATGATGATGGCGTCTTACATGAACCCCCTAGGATCAAGCAGAGATTACCACA	TGCAGAGCTCTTTACTGATGATGATGGCGTCTTACATGAACCCCCTAGGATCAAGCAGAGATTACCACA	chr1L	1185787976	1	9.88e-28	Minus	15:C>T	0	0	0	0	0	0	-	0	-	0	-	0	0	0	1	0	0	0	0	0	0	0	-	0	0	0	0	-	0	0	0	-	0	0	-	0	-	0	0	0
D15692	3522185	TGCAGAGCTCTTTACCGATGATGATGGCGTCTTACATGAACCCCCTAGGATCAAGCAGAGATTACCACA	TGCAGAGCTCTTTACCGATGATGATGGCGTCTTACACGAACCCCCTAGGATCAAGCAGAGATTACCACA	chr1L	1185787955	1	9.88e-28	Minus	36:T>C	0	0	0	0	0	0	-	0	1	0	1	0	0	0	-	0	0	0	0	0	0	2	-	0	0	2	0	-	0	0	0	1	2	0	-	0	1	2	2	0
D15715	3513502	TGCAGATCATATGTTGGATTCCAAGAACCATCAACTATAACAACACGGTTAGCTGCATGAAGATTACAG	TGCAGATCATATGTTGGATTCCAAGAACCATCCACTATAACAACACGGTTAGCTGCATGAAGATTACAG	chr3	499208212	1	4.6e-26	Plus	32:A>C	0	0	0	0	0	0	0	0	0	0	-	-	0	0	0	0	0	0	-	0	0	-	0	-	0	0	0	0	0	0	-	-	0	0	0	0	0	0	0	0
D15716	3513502	TGCAGATCATATGTTGGATTCCAAGAACCATCAACTATAACAACACGGTTAGCTGCATGAAGATTACAG	TGCAGATCATATGTTGGATTCCAAGAACCATCAACTATAACAACACGGTTAGCTGCATGAAGATTAATT	chr3	0	1	4.6e-26	Plus	66:C>A	0	0	0	0	0	0	0	0	0	0	-	-	0	0	0	0	0	0	1	0	0	-	0	-	0	0	0	0	0	0	-	-	0	0	0	0	0	0	0	0
D15717	3513502	TGCAGATCATATGTTGGATTCCAAGAACCATCAACTATAACAACACGGTTAGCTGCATGAAGATTACAG	TGCAGATCATATGTTGGATTCCAAGAACCATCAACTATAACAACACGGTTAGCTGCATGAAGATTAAAA	chr3	0	1	4.6e-26	Plus	68:G>A	0	0	0	0	0	0	0	0	0	0	-	-	0	0	0	0	0	0	-	0	0	-	0	-	0	0	0	0	0	0	-	-	0	0	0	0	0	0	0	0
D15731	3514466	TGCAGATTATTTGAGGTTCGTTGTATTCTTTTAGTAGTGCTAATATAAGTGTGGAAGCTTAGTGTTTTT	TGCAGATTATTTGAGGTTCGTTGTATTCTTTTAGTAATGCTAATATAAGTGTGGAAGCTTAGTGTTTTT	chr1L	1045467111	1	9.88e-28	Plus	36:G>A	0	0	0	0	0	0	0	0	0	-	0	0	0	0	-	-	0	-	0	-	0	0	0	0	0	-	0	0	0	0	0	0	0	0	0	0	0	0	-	0
D15732	3514466	TGCAGATTATTTGAGGTTCGTTGTATTCTTTTAGTAGTGCTAATATAAGTGTGGAAGCTTAGTGTTTTT	TGCAGATTATTTGAGGTTCGTTGTATTCTTTTAGTAGTGCTAATATAATTGTGGAAGCTTAGTGTTTTT	chr1L	1045467123	1	9.88e-28	Plus	48:G>T	0	0	0	2	0	0	0	0	0	-	0	0	0	0	-	-	0	-	2	-	0	0	0	0	0	-	0	0	0	0	0	0	0	0	0	0	0	0	-	0
D15733	3514466	TGCAGATTATTTGAGGTTCGTTGTATTCTTTTAGTAGTGCTAATATAAGTGTGGAAGCTTAGTGTTTTT	TGCAGATTATTTGAGGTTCGTTGTATTCTTTTAGTAGTGCTAATATAATTGTGGAAGCTTAGTGTTTAC	chr1L	1045467142	1	9.88e-28	Plus	67:T>A	0	0	0	0	0	0	0	0	0	-	0	0	0	0	-	-	0	-	0	-	0	0	0	0	0	-	0	0	0	0	0	0	0	0	0	0	0	0	-	0
D15735	32610324	TGCAGATTCCATGCTTCTTGCAGCAATGATGACATGTACATTTCTAAGAGCCAACACTCTTGTTGTCTC	TGCAGATTCCATGCTTCTTGCAGCAATGATGACATATACATTTCTAAGAGCCAGCACTCTTGTTGTCTC	chr5	918683789	1	9.88e-28	Minus	35:G>A	0	-	-	0	0	0	0	0	0	-	0	0	0	0	0	0	0	0	0	0	0	0	0	0	0	0	0	-	0	0	-	0	0	0	0	0	0	0	0	0
D15750	13908792	TGCAGATTTGATCTTCATCCAGCAAGCAACTAGTGGGGTGTCATACAAGAAATAAATTGGTATGGTAGG	TGCAGATTTGATCTTCTTCCAGCAAGCAACTAGTGGGGTGTCATACAAGAAATAAATTGGTATGGTAGG	chr4	1573846115	1	4.6e-26	Minus	16:A>T	0	0	-	-	0	0	0	0	0	0	0	0	0	0	0	0	0	0	0	-	0	0	0	0	0	0	-	-	0	0	-	0	0	0	0	0	0	0	0	0
D15769	13867455	TGCAGCAGACTCTTCTATCCATTGAGAAAAAGGAATACCGCATATATGCCAATGCATCAAATAAATTAC	TGCAGCAGACTCTTCTATCCATTGAGAAAAAGGAATATCGTATACATGCCAATGCATCAAATAAATTAC	chr2	1698217861	1	3.55e-27	Plus	44:T>C	0	0	0	0	0	0	0	0	0	0	0	0	0	0	-	2	0	0	-	0	0	0	0	0	0	0	0	0	0	0	0	0	-	0	0	0	0	0	-	-
D15770	13867455	TGCAGCAGACTCTTCTATCCATTGAGAAAAAGGAATACCGCATATATGCCAATGCATCAAATAAATTAC	TGCAGCAGACTCTTCTATCCATTGAGAAAAAGGAATATCGTATATATGCCAATGCGTCAAATAAATTAC	chr2	1698217872	1	3.55e-27	Plus	55:A>G	0	0	0	0	0	0	0	0	0	0	0	0	0	0	-	0	0	0	-	0	0	0	0	0	0	0	0	0	0	0	0	0	-	0	0	0	0	0	-	-
D15786	39981055	TGCAGCATTAGAACAAAGATAAAAGTATGACCCTCTTGTTCGTAATGATTAGAGTATGATATTACAGAT	TGCAGCATTAGAACAAAGATAAAAGTATGACCCTCTTGTTCGTAATGATTAGAGTATGATATTAACTGG	chr2	0	1	5.37e-25	Plus	64:C>A	0	-	-	0	0	0	0	0	0	0	0	0	0	-	0	0	0	0	0	0	0	-	0	0	0	-	0	0	0	0	-	0	0	0	0	0	0	0	0	-
D15787	39981055	TGCAGCATTAGAACAAAGATAAAAGTATGACCCTCTTGTTCGTAATGATTAGAGTATGATATTACAGAT	TGCAGCATTAGAACAAAGATAAAAGTATGACCCTCTTGTTCGTAATGATTAGAGTATGATATTAATTTC	chr2	0	1	5.37e-25	Plus	65:A>T	0	-	-	0	0	0	0	0	0	0	0	0	0	-	0	0	0	0	0	0	0	-	0	0	0	-	0	0	0	0	-	0	0	0	0	0	0	0	0	-
D15788	39965277	TGCAGCATTCTTCAAAATATACTTTGCTAGCAAAAGCTCACCTTGTAAACCTAAGAAACTCAAAAGATG	TGCAGCATTCTTCAAAATATACTTTGCTAGCAAAAGCTCACCTTGTAAACCTAAAAAACTCAAAAGATG	chr5	204008045	1	9.88e-28	Minus	54:G>A	0	0	-	0	0	0	0	0	0	-	-	0	0	0	-	0	0	0	0	0	0	0	0	0	0	0	0	0	0	0	-	0	0	0	0	0	0	0	0	0
D15789	39965277	TGCAGCATTCTTCAAAATATACTTTGCTAGCAAAAGCTCACCTTGTAAACCTAAGAAACTCAAAAGATG	TGCAGCATTCTTCAAAATATACTTTGCTAGCAAAAGCTCACCTTGTAAACCTAAGAAACTCAAAAGGTG	chr5	204008033	1	9.88e-28	Minus	66:A>G	0	0	1	0	0	0	0	0	0	-	-	2	0	0	-	0	0	0	0	0	2	0	0	0	0	0	0	0	2	0	1	2	0	0	2	0	2	0	0	0
D15803	13868954	TGCAGCCTAGAATTCCCCTTCAGCATCACCCAAGCAACCATTTTGTACAGCCTGGAACAGGGCAGAATA	TGCAGCCTAGAATTCCCCTTCAGCATCACGCAAGCAACCATTTTGTACAGCCTGGAACAGGGCAGAATA	chr3	869722868	1	9.88e-28	Minus	29:C>G	0	-	0	0	0	0	0	0	0	0	0	0	0	0	-	0	0	0	-	0	-	2	-	0	0	0	-	0	0	0	0	-	1	0	0	0	0	0	0	0
D15804	39980730	TGCAGCCTCTGGCACCAAAAAATTTCAGGAGGGATTCTTCCGGTGAAAAGATTAGATGAAACATTACAG	TGCAGCCTCTGGCACCAAAAAATTTCAGGAGGGATTCTTCCGGTGAAAAGATTAGATGAAACATTAATG	chr3	0	1	4.6e-26	Plus	67:A>T	0	0	0	0	0	0	0	0	0	0	0	0	0	0	0	0	0	0	0	0	-	-	-	-	0	0	0	0	0	0	-	0	0	-	0	0	0	0	0	0
D15845	32608486	TGCAGCTGCAACGCCATCTTCATTCTCTATCAACTTAGCAACTTCCATCGCCCGAGATTTCACCTGAAA	TGCAGCTGCAACGCCATCTTCATTTTCTATCAACTTAGCAACTTCCATCGCCCGAGATTTCACCTGAAA	contig_3211	352930	1	9.88e-28	Plus	24:C>T	0	-	0	0	0	0	0	0	-	0	1	0	0	0	0	0	0	0	0	-	0	0	0	0	0	0	0	1	0	0	0	0	-	-	0	-	0	0	-	0
D15846	32608486	TGCAGCTGCAACGCCATCTTCATTCTCTATCAACTTAGCAACTTCCATCGCCCGAGATTTCACCTGAAA	TGCAGCTGCAACGCCATCTTCATTTTCTATCAACCTAGCAACTTCCATCGCCCGAGATTTCACCTGAAA	contig_3211	352940	1	9.88e-28	Plus	34:T>C	0	-	0	0	0	0	0	0	-	0	-	0	0	0	0	0	0	0	0	-	0	0	0	0	0	0	0	-	0	0	0	0	-	-	0	-	0	0	-	0
D15849	39980570	TGCAGCTGGTTATCCAAACCATAAACCTCAGCATGAATGAACTGCTCATCAGTTCTAAGCACTTTACAG	TGCAGCTGGTTATCCAAACCATAAACCTCAGCATGAATGAACTGCTCATCAGTTCTAAGCACTTTAACT	chr6	0	1	4.6e-26	Minus	68:G>T	0	0	0	0	0	0	0	0	0	0	-	0	0	0	0	0	0	0	0	0	0	-	0	0	0	0	0	-	0	0	0	0	0	0	0	0	0	0	-	-
D15863	3526962	TGCAGGAAAATCAAAAACCGTGCCTATCTAAACAAACACATGTAAACAACCGACCATGACCTCGTCCCA	TGCAGGAAAATAAAAAACCGTGCCTATCTAAACAAACACATGTAAACAACCGACCATGACCTCGTCCCA	chr5	442114205	1	9.88e-28	Minus	11:C>A	0	0	0	0	0	0	0	0	0	0	-	0	0	0	0	0	0	0	-	0	0	2	0	0	0	0	0	0	0	0	0	2	0	0	0	-	0	0	0	0
D15875	3521616	TGCAGGAATGGAATAAAAACGTGCATCGTTCATGTGAGTAATTGTGGCAGCAAATGACTGCATTTCGTT	TGCAGGAATGGAATAAAAATGTGCATCGTTCATGTGAGTAATTGTGGCGGCAAATGACTGCATTTCGTT	chr5	249937023	1	4.6e-26	Plus	19:C>T	-	0	0	0	0	0	0	0	0	0	0	-	0	-	0	0	0	0	0	0	-	0	0	0	0	0	0	-	-	0	0	0	0	0	0	0	0	0	0	0
D15876	3521616	TGCAGGAATGGAATAAAAACGTGCATCGTTCATGTGAGTAATTGTGGCAGCAAATGACTGCATTTCGTT	TGCAGGAATGGAATAAAAATGTGCATCGTTCATGTGAGTAATTGTGGCAGCAAATGACTGCATTTTGTT	chr5	249937069	1	4.6e-26	Plus	65:C>T	-	0	0	0	0	0	0	0	0	0	0	-	0	-	0	0	0	0	0	0	-	0	0	0	0	0	0	-	1	0	0	0	0	0	0	0	0	0	2	0
D15901	39979189	TGCAGGCACATAAAACCACACTATCAAGAAAATGAACCATAAGTTTTTGGCGAGTAACCACCAAAAGGT	TGCAGGCACATAAAACCACACTATCAAGAAAATGAACCATACGTTTTTGGCGAGTAACCACCAAAAGGT	chr5	95271954	1	9.88e-28	Plus	41:A>C	0	0	-	0	0	0	0	-	-	0	0	-	0	-	0	0	0	0	0	0	0	0	0	0	0	0	-	0	0	0	0	0	-	0	1	-	0	0	-	-
D15939	39974020	TGCAGGTATGGTTGGTTGCATTTTCGCTTAGATGTATGTCGTTTTTTGAACTCTCTGGGCAATGCTCGT	TGCAGGTATGGTTGGTTGCATTTTCGCTTAGATGTATGTCGTTTTTTGAACTCTCTGGGCAATGCTCGA	chr6	1026976430	1	9.88e-28	Plus	68:T>A	0	0	-	0	0	0	0	-	0	0	-	0	0	0	0	0	0	0	0	0	-	0	0	0	0	0	0	0	0	0	0	0	0	0	0	0	0	0	0	0
D15967	3524729	TGCAGTACAAAACAAGTCAAGGGTAACTTCATAGCAACTAGGCAACTAAAATTTGACTGTGAAAAAACT	TGCAGTACAAAACAAGTCAAGGGTAACTTCATAGCAACTAGGCAACTAAAATTTGACTGTGAAAAAGCT	chr1L	427503036	1	9.88e-28	Minus	66:A>G	2	0	0	-	2	0	0	0	0	0	2	0	0	1	0	0	0	0	-	0	0	0	2	-	-	0	0	0	0	0	0	-	0	0	-	2	0	0	2	0
D15969	18321041	TGCAGTAGAAAGAAGTGCCATGCTATCTTCTTCTTCCTTTCATCCAAACTATATTTAGAATCTGACGCT	TGCAGTAGAAAGAAGTGCCATGCTATCTTCTCCTTCCTTTCATCCAAACTATATTTAGAATCTGACGCT	chr2	1468882163	1	9.88e-28	Minus	31:T>C	0	0	-	0	0	0	0	0	0	0	0	0	2	0	0	0	0	-	0	0	0	0	0	-	0	0	0	0	0	0	0	0	0	-	-	0	0	0	-	0
D15970	18321041	TGCAGTAGAAAGAAGTGCCATGCTATCTTCTTCTTCCTTTCATCCAAACTATATTTAGAATCTGACGCT	TGCAGTAGAAAGAAGTGCCATGCTATCTTCTTCTTCCTTTCATCCAAACTGTATTTAGAATCTGACGCT	chr2	1468882144	1	9.88e-28	Minus	50:A>G	0	0	1	0	2	0	0	0	0	0	0	2	0	0	2	0	0	1	0	0	0	0	0	-	0	0	0	2	0	0	0	0	0	-	1	0	0	0	-	0
D15972	39974281	TGCAGTAGGATCAGCCAAGATGTAGTTCTTGTGAAGTATGCATGTTAGCGATAATGGAATGCTTTTTAC	TGCAGTAGGATCAGCCAAGATGTAGTTCTTGTGAAGTATGCATGTTAGCGATAATGGAGTGCTTTTTAC	chr3	1341209862	1	3.55e-27	Minus	58:A>G	0	0	2	0	0	0	0	0	0	0	0	0	0	0	0	-	0	0	0	-	0	-	0	0	0	-	0	-	0	0	0	2	0	0	-	1	0	0	-	0
D15973	39974281	TGCAGTAGGATCAGCCAAGATGTAGTTCTTGTGAAGTATGCATGTTAGCGATAATGGAATGCTTTTTAC	TGCAGTAGGATCAGCCAAGATGTAGTTCTTGTGAAGTATGCATGTTAGCGATAATGGAATGCTTTACAG	chr3	1341209855	1	3.55e-27	Minus	65:T>A	0	0	0	0	0	0	0	0	0	0	0	0	0	0	0	-	0	0	0	-	0	-	0	0	0	-	0	-	0	0	0	0	0	0	-	-	0	0	-	0
D15981	13868781	TGCAGTCAATTGTGACCGCAGAGAATCCATATCCATCCATTAGGTGATCTTTGAAGGGCATAGATAAAA	TGCAGTCAATTGTGACCGCAGAGAATCCATATCTATCCATTAGGTGATCTTTGAAGGGCATAGATAAAA	chr3	1594142800	1	9.88e-28	Plus	33:C>T	0	0	2	0	0	0	0	0	0	0	0	2	0	0	-	0	0	0	-	0	-	0	0	0	0	0	0	0	-	0	2	0	0	0	0	0	-	0	0	0
D15986	3512911	TGCAGTCACTGCCCGTGACAGCCTTACAAAGTCCTTCATATGAAGTGTTGTATCAGAATTTTACAGATC	TGCAGTCACTTCCCGTGACAGCCTTACAAAGTCCTTCATATGAAGTGTTGTATCAAAATTTTACAGATC	chr2	1645858929	1	1.88e-24	Minus	10:G>T	0	-	0	0	0	0	0	-	0	0	0	0	0	-	0	0	0	-	0	0	0	2	-	0	0	0	1	0	1	0	0	0	0	0	-	0	0	0	0	0
D16007	13912328	TGCAGTGGTAAGGGTTTCATCAGAGGTGAAAAGCTTACAGAACTTGTCACTATCAGAAAGATTTGAGCA	TGCAGTGGTAGGGGTTTCATCAGAGGTGAAAAGCGTACAGAACTTGTCACTATCAGAAAGATTTGAGCA	chr6	776011954	1	9.88e-28	Plus	10:A>G	0	0	0	0	0	0	0	0	-	0	0	0	0	0	0	-	0	0	0	0	0	0	0	0	0	0	0	0	0	0	0	0	0	0	0	0	0	-	0	-
D16022	13909158	TGCAGTGTTGACATAAGTTCATCAGAGTCATTTCTTCGAGGAGGACACAAACCGAGCATTACAGATCGG	TGCAGTGTTGACATAAGTTCATCAGAGTCATTTCTTCGAGGAGGACGCAAACCGAGCATTACAGATCGG	chr2	1292850628	1	2.29e-23	Plus	46:A>G	0	0	0	0	0	0	2	0	-	-	-	0	0	0	-	0	0	0	0	0	-	0	0	0	0	0	0	0	0	0	0	0	0	0	0	-	0	0	0	0
D16038	3520075	TGCAGTTCAATCTTTCTCATCTTTTTGTTTTCTGTATAAAAAGATAATTGGAAAAATTATTTACAGATC	TGCAGTTCAATCTTTCTCATCTTTTTGTTTTCTGTATAAAAAAATAATTGGAAAAATTATTTACAGATC	chr3	314189413	1	1.88e-24	Plus	42:G>A	-	0	0	0	0	0	0	0	-	0	-	0	0	0	0	0	0	0	0	0	0	0	0	0	0	0	0	0	0	0	0	0	0	0	0	0	0	0	0	0
D16059	3524384	TGCAGTTGCACCATAATGTGCCACTATTGACAACATAGGATTGAAAGGGAAACACAGTGTTTTGATGGT	TGCAGTTGCACCATAATGTGCCACTATTGACAACATAAGATTGAAAGGGAAACACCGTGTTTTGATGGT	chr1S	1022124116	1	9.88e-28	Plus	37:G>A	0	0	0	0	0	0	0	0	0	0	0	0	0	0	-	0	0	0	0	0	0	0	0	0	0	0	0	0	0	0	0	0	0	0	-	0	0	-	0	-
D16060	3524384	TGCAGTTGCACCATAATGTGCCACTATTGACAACATAGGATTGAAAGGGAAACACAGTGTTTTGATGGT	TGCAGTTGCACCATAATGTGCCACTATTGACAACATAGGGTTGAAAGGGAAACACAGTGTTTTGATGGT	chr1S	1022124118	1	9.88e-28	Plus	39:A>G	0	0	0	0	0	2	0	0	0	0	0	0	2	2	-	0	0	0	0	0	0	0	0	0	0	0	0	0	0	0	0	0	0	0	-	0	0	-	0	-
D16066	13865388	TGCAGTTGCTTATCATTTGAATTCCCCACGTTGAACTTCAAAGCTTGGCGTAACACTTCTCTTACTGAA	TGCAGCTGCTTATCATTTGAATTCCCCACGCTGAACTTCAAAGCTTGGCGTAACACTTCTCTTACTGAA	chr3	1310587526	1	9.88e-28	Minus	30:T>C	0	0	0	-	0	0	0	0	0	-	0	0	0	0	0	0	0	0	0	0	0	-	0	0	0	0	0	0	0	0	0	0	0	-	0	0	0	-	0	0
D16067	13865388	TGCAGTTGCTTATCATTTGAATTCCCCACGTTGAACTTCAAAGCTTGGCGTAACACTTCTCTTACTGAA	TGCAGCTGCTTATCATTTGAATTCCCCACGTTGAACTTCAAAGCTTGACGTAACACTTCTCTTACTGAA	chr3	1310587509	1	9.88e-28	Minus	47:G>A	0	0	0	-	0	0	0	0	0	-	0	0	0	0	0	0	0	0	0	0	0	-	0	0	0	0	0	0	0	0	0	0	0	-	0	0	0	-	0	0
D16069	13865388	TGCAGTTGCTTATCATTTGAATTCCCCACGTTGAACTTCAAAGCTTGGCGTAACACTTCTCTTACTGAA	TGCAGCTGCTTATCATTTGAATTCCCCACGTTGAACTTCAAAGCTTGGCGTAACACCTCTCTTACTGAA	chr3	1310587500	1	9.88e-28	Minus	56:T>C	0	0	0	-	0	0	0	0	0	-	0	0	0	0	0	0	0	0	0	0	0	-	0	0	0	0	0	0	0	0	0	0	0	-	0	0	0	-	0	0
D16073	3526978	TGCAGTTGTACTTCTTTTGCAAATCAACAGAAAACCCAGAACATGGTGCGTACAACAGCCACAATCAAT	TGCAGTTGTACTTCTTTTGCAAATCAACAGAAAACCCAGAACATGGTGCATACAACAGCCACAATCAAT	chr4	46167362	1	3.55e-27	Minus	49:G>A	0	-	-	0	0	0	0	0	-	0	0	0	0	0	-	0	0	0	-	0	0	0	0	0	0	-	0	0	-	0	0	0	0	0	0	0	0	0	0	0
D16082	39968010	TGCAGTTTCCTATTTTGTTTTGTGTCACTTTTGCCTACACTGCCAAAATCCAGTTGTTCTTATAGTTGT	TGCAGTTTCCTATTTTGTTTTGTGTCACTTTTGCCTACACTGCCAAAATCCAGTTGTTCTTATAGTTAT	contig_6988	28167	1	9.88e-28	Minus	67:G>A	0	0	-	0	0	0	0	-	-	0	0	0	0	0	0	0	0	0	0	0	0	0	0	0	0	0	-	0	0	0	0	0	0	0	0	0	0	0	0	-
D16131	39971900	TGCAGATTATAGGCATGCATTGATCATAATTTGTTTTGTCATGCTTTGGGTCACACTAAGCTACTATAA	TGCAGATTATAGGCATGGATTGATCATAATTTGTTTTGTCGTGCTTTGGGTCACACTAAGCTACTATAA	chr1L	1412458856	1	9.88e-28	Plus	17:C>G	0	0	0	2	0	0	-	0	0	-	-	2	0	-	-	0	0	0	0	-	0	0	0	0	0	-	0	0	0	0	2	0	-	-	0	0	0	0	0	-
D16133	3519410	TGCAGCACGTTGAGCATTCACAGGATGAGAAACCAAAATTTTTGTTATTTCCTTAGACAGCTCATTACA	TGCAGCACGTTGAGCATTCACAGGATGAGAAACCAAAATTTTTGTTATTTCCTTAGACATCTCATTACA	chr1S	128091810	1	1.28e-26	Minus	59:G>T	0	-	0	0	0	-	0	0	0	0	0	0	0	-	-	-	0	0	0	0	0	0	0	0	0	-	0	0	0	0	0	-	0	0	0	0	-	0	0	-
D16222	3522765	TGCAGAGTTTACTACAAGTTTAGGAATAAGTAATAATTCTGGTTGCAAAATTGATGTCTCATTCCATTC	TGCAGAGTTTACTACAAGTTTAGGAATAAGTAATAATTCTGGTTGCAAAATTGATGTCTCCTTCCATTC	chr1S	1240511111	1	9.88e-28	Minus	60:A>C	0	2	0	0	0	0	0	0	0	0	0	0	0	0	0	-	0	0	-	0	0	0	-	0	0	0	0	-	0	-	0	0	0	1	-	-	2	0	1	-
D16223	3522765	TGCAGAGTTTACTACAAGTTTAGGAATAAGTAATAATTCTGGTTGCAAAATTGATGTCTCATTCCATTC	TGCAGAGTTTACTACAAGTTTAGGAATAAGTAATAATTCTGGTTGCAAAATTGATGTCTCAGTCCATTC	chr1S	1240511110	1	9.88e-28	Minus	61:T>G	0	0	0	0	0	0	0	0	0	0	0	0	0	0	0	-	0	0	-	0	0	0	-	0	0	0	0	-	0	-	0	0	0	-	-	-	0	0	-	-
D16284	13869678	TGCAGGTAAAGGAAAAGTCATCCGTCAGTAAGGTGGTTGTTGACGAAATTGCCGAATTCATTACAGATC	TGCAGGTAAAGGAAAAGTCATCCGTCAGTAAGGTGGTTGTTGATGAAATTGCCGAATTCATTACAGATC	chr1L	938429788	1	1.88e-24	Plus	43:C>T	0	0	0	0	0	0	0	0	0	0	0	0	0	0	0	0	0	0	0	0	0	0	0	2	2	1	2	0	0	0	2	-	0	0	0	-	0	0	0	-
D16285	13869678	TGCAGGTAAAGGAAAAGTCATCCGTCAGTAAGGTGGTTGTTGACGAAATTGCCGAATTCATTACAGATC	TGCAGGTAAAGGAAAAGTCATCTGTCAGTAAGGTGGTTGTTGACGAAATTGCCGAATTCATTAAAAACA	chr1L	0	1	1.88e-24	Plus	63:C>A	0	0	0	0	0	0	0	0	0	0	0	0	0	0	0	0	0	0	0	0	0	0	0	0	0	-	0	0	0	0	0	-	0	0	0	-	0	0	0	-
D16286	13869678	TGCAGGTAAAGGAAAAGTCATCCGTCAGTAAGGTGGTTGTTGACGAAATTGCCGAATTCATTACAGATC	TGCAGGTAAAGGAAAAGTCATCTGTCAGTAAGGTGGTTGTTGACGAAATTGCCGAATTCATTAATAATG	chr1L	0	1	1.88e-24	Plus	64:A>T	0	0	0	0	0	0	0	0	0	0	0	0	0	0	0	0	0	0	0	0	0	0	0	0	0	-	0	0	0	0	0	-	0	0	0	-	0	0	0	-
D16292	39980988	TGCAGCAATTGCTGTTAGAAGTAAGCATAGTTAGACAAGAATCCACCTTATATTGCATTTTACAGATCG	TGCAGCAATTGCTGTTAGAAGTAAGCATAGTTAGACAAGAATCCACCTTATATTGCATTTTAACCCTTG	chr4	0	1	6.57e-24	Minus	62:C>A	0	0	0	0	0	0	0	0	0	0	-	0	0	0	0	0	0	0	-	0	-	0	-	0	0	0	0	-	0	0	0	0	-	0	0	0	0	0	-	0
D16293	39980988	TGCAGCAATTGCTGTTAGAAGTAAGCATAGTTAGACAAGAATCCACCTTATATTGCATTTTACAGATCG	TGCAGCAATTGCTGTTAGAAGTAAGCATAGTTAGACAAGAATCCACCTTATATTGCATTTTAAGCATCG	chr4	0	1	6.57e-24	Minus	63:A>G	0	0	0	0	0	0	0	0	0	0	-	0	0	0	0	0	0	0	-	0	-	0	-	0	0	0	0	-	0	0	0	0	-	0	0	0	0	0	-	0
D16313	32612257	TGCAGAATGGAAATGTTTTGCAGTGGATTGTTGTAAAGTATCTATATCAATAAGAGATTACAGATCGGA	TGCAGAATGGAAATGTTTTGCAGTGGATTGTTGTAAAGTATCTATATCAAAAAGAGATTACAGATCGGA	chr2	898516435	1	8.01e-23	Minus	50:T>A	0	0	0	0	0	0	0	0	0	0	0	0	0	0	-	0	0	0	0	0	-	0	0	0	0	-	-	-	0	1	0	0	0	0	0	0	0	0	-	0
D16314	32612257	TGCAGAATGGAAATGTTTTGCAGTGGATTGTTGTAAAGTATCTATATCAATAAGAGATTACAGATCGGA	TGCAGAATGGAAATGTTTTGCAGTGGATTGTTGTAAAGTATCTGTGTCAATAAGAAATTACAGATCGGA	chr2	898516430	1	8.01e-23	Minus	55:G>A	0	0	0	0	0	0	0	0	0	0	0	0	0	0	-	0	0	0	0	0	-	0	0	0	0	-	-	-	0	-	0	0	0	0	0	0	0	0	-	0
D16320	39968453	TGCAGACAAGCATTGGTATGAATGACAATACATGAAATACTAAAGTGTTTTACAGATCGGAAGAGCGGT	TGCAGACAAGCATTGGTGTGAATGACAATACATGAAATACTAAAGTGTTTTACAGATCGGAAGAGCGGT	chr6	1210673935	1	1.7e-18	Minus	17:A>G	0	0	0	0	0	0	0	0	0	0	0	0	0	0	0	0	0	0	0	0	-	0	0	0	0	0	0	0	0	0	0	0	-	0	0	0	0	0	0	-
D16348	13905899	TGCAGCATGTTCTATATCGGAGATAGATCATCCATAGATAGTTTTTTACAGATCGGAAGAGCGGTTCAG	TGCAGCATGTTCTATATCGGAGATAGATCACCCATAGATAGTTTTTTACAGATCGGAAGAGCGGTTCAG	chr1S	233532536	1	2.5e-16	Plus	30:T>C	0	0	0	0	0	0	0	0	0	0	0	0	0	0	-	0	1	0	2	-	0	0	0	-	0	0	0	0	0	0	0	0	0	0	0	0	0	0	0	0
D16383	18321654	TGCAGGTAGGCGACTTCCAAAGAGAGTTTGCACCAATGTGTTACAGATCGGAAGAGCGGTTCAGCAGGA	TGCAGGCAAGCGACTTCCAAAGAGAGTTTGCACCAATGTGTTACAGATCGGAAGAGCGGTTCAGCAGGA	chr2	545960082	1	1.16e-13	Minus	6:T>C	0	0	1	-	1	0	0	0	0	0	-	-	0	0	-	0	0	0	0	0	0	0	0	0	0	0	-	0	0	0	0	0	0	0	0	0	0	0	0	0
D16402	32611435	TGCAGTAGGTGGCTTTTGATTTACACTCTAAGGACACTGTTTTACAGATCGGAAGAGCGGTTCAGCAGG	TGCAGTAGGTGGCTTTTGATTTACACTCTAAGGACAATGTTTTACAGATCGGAAGAGCGGTTCAGCAGG	chr6	1211160834	1	3.42e-14	Plus	36:C>A	0	0	-	0	0	0	0	0	0	0	0	0	0	0	0	0	1	0	0	0	0	0	0	0	0	0	-	0	0	0	0	1	0	2	2	0	0	0	0	0
D16434	3527998	TGCAGCATGCATCTTTCTCTTTAGCGTTAGGGGCACCTTTTACAGATCGGAAGAGCGGTTCAGCAGGAA	TGCAGCATGCATCTTTCTCTTTAGTGTTAGGGGCACCTTTTACAGATCGGAAGAGCGGTTCAGCAGGAA	chr3	201576343	1	3.94e-13	Plus	24:C>T	0	0	-	0	0	0	0	0	0	0	0	0	0	0	2	0	1	-	0	0	0	0	0	0	0	-	0	1	0	1	2	0	-	2	0	0	0	2	0	0
D16435	3527998	TGCAGCATGCATCTTTCTCTTTAGCGTTAGGGGCACCTTTTACAGATCGGAAGAGCGGTTCAGCAGGAA	TGCAGCATGCATCTTTCTCTTTAGCGTTAGGAGCACCTTTTACAGATCGGAAGAGCGGTTCAGCAGGAA	chr3	201576350	1	3.94e-13	Plus	31:G>A	0	0	-	0	0	0	0	0	0	0	0	0	0	0	0	0	-	-	0	0	0	0	0	0	0	-	0	-	0	0	0	0	-	0	0	0	0	0	0	0
D16479	22856359	TGCAGCTTATGGAAAATACTAATAATGCTTATTAGGTCTCAATTGATAGGTTACCAATTTATTTTTACA	TGCAGCTTATGGAAAATACTAATAATGCTTATTAGGTCTCAATTGATAGGTTACCAATATATTTTTACA	chr6	1464212397	1	1.28e-26	Plus	58:T>A	0	0	0	0	0	0	0	0	0	0	0	0	0	-	0	0	0	0	0	-	0	0	0	0	0	0	0	0	0	0	0	0	0	0	0	0	0	0	0	2
D16493	3524503	TGCAGAAACAAAGTAAACAATCATCAAATTCCATAATTTGAAAAGCAATAAAACTATAAAAAAAAGACT	TGCAGAAACAAAGTAAACAATCATCAAATTCCATAATTTGAAAAGCAATAAAACTATAAAAAAAAAAAG	chr6	1320866856	1	9.88e-28	Plus	67:C>A	0	0	0	1	0	0	-	0	0	0	0	0	0	-	0	0	0	2	0	0	0	-	0	0	-	1	0	0	0	0	-	0	0	0	0	-	0	-	0	0
D16509	3522129	TGCAGAACATGTAGATTTGTGTAAGACACTTGATTAGACGAAACATGTAAAGTTCGAAAATATTTCTTA	TGCAGAACATGTAGATTTGTGTAAGACACTTGATTAGACGAAACATGTAAAGTTCCAAAACATTTCTTA	chr5	1266656800	1	9.88e-28	Plus	55:G>C	-	0	0	0	0	0	0	0	-	0	-	0	0	-	2	-	0	0	0	0	0	0	0	0	0	0	0	-	0	0	0	0	0	-	-	0	0	0	0	0
D16554	32613174	TGCAGACAATGGAGAATGTAGTGGCGTCTCTCCCTTCTCAGAAGCTAGCTTTGGAGGATAAATTACAGA	TGCAGACAATGGAGAATGTAGTGGCCTCTCTCCCTTCTCAGAAGCTAGCTTTGGAGGATAAATTAACAC	chr1S	0	1	7.69e-24	Plus	65:C>A	0	0	0	-	0	0	0	0	0	0	0	0	0	0	0	-	0	0	0	0	0	0	0	0	0	0	-	0	0	0	0	0	0	0	0	0	0	0	0	-
D16564	3521177	TGCAGACCGAGAACGAGCACCCACCAGCAAACCAGACCCCTAATTGTATGCATCATCCATTCCGGTGCA	TGCAGACCGAGAACAAGCACCCACCAGCAAACCAGACCCCTGATTGTATGCATCATCCATTCCGGTGCA	chr2	1492500975	1	9.88e-28	Minus	14:G>A	0	0	-	0	0	0	-	0	0	-	-	0	0	0	0	-	0	0	0	0	0	0	0	0	0	2	-	0	0	0	0	0	0	0	0	0	0	0	-	-
D16565	3521177	TGCAGACCGAGAACGAGCACCCACCAGCAAACCAGACCCCTAATTGTATGCATCATCCATTCCGGTGCA	TGCAGACCGAGAACGAGCACCCACCAGCAAACCAGACCCCTAATCGTATGCATCATCCATTCCGGTGCA	chr2	1492500945	1	9.88e-28	Minus	44:T>C	0	0	-	0	0	0	-	0	0	-	-	0	0	0	0	-	0	0	0	0	0	0	0	0	0	0	-	0	2	0	0	2	0	0	0	0	0	0	-	-
D16577	13868482	TGCAGAGAGGGCAAGTCCTTTCTCTCTCAAACCTGACAAGAGAATTGCCTTTGTTGGTTACAACTTACA	TGCAGAGAGGGCAAGTCCTTTCTCTCTCAAACCTGACAAGAGAATTGCCTTTGTTGGTTACATCTTACA	chr1L	187039546	1	4.6e-26	Plus	62:A>T	0	0	0	0	0	0	0	0	0	0	-	0	0	-	0	0	0	0	0	0	0	0	2	0	0	0	0	0	0	0	0	0	0	0	2	-	0	0	-	-
D16605	13910595	TGCAGATCATCTTGGTAGCATGGTTCTAGATACTGGCTCCAACAAAAACCCGATTAGGTTATAATTTTA	TGCAGATCATCTTGGTAGCATGGTTCTAGATACTGGCTCCAACAAAAATCCGATTAGGTTATAATTTTA	chr6	1487171413	1	4.6e-26	Minus	48:C>T	1	-	-	1	1	1	1	0	1	1	1	1	1	1	1	1	1	1	1	-	1	1	1	1	1	1	1	1	1	1	1	1	1	1	1	1	1	1	1	1
D16606	3523655	TGCAGATCTGAAACTCTTTCGATCTTCAAAAGAACTCATTTTCATTTCTGGGTTTTGATATTTGCCTTA	TGCAGATCTGAAACTCTTTGGATCTTCAAAAGAACTCATTTTGATTTCTGGGTTTTGATATTTGGCTTA	chr1L	945863209	1	9.88e-28	Plus	19:C>G	0	0	0	0	0	0	0	0	-	0	0	0	0	-	0	0	0	0	0	0	0	0	0	0	0	0	2	0	0	0	0	-	-	0	0	0	0	0	0	0
D16608	3523655	TGCAGATCTGAAACTCTTTCGATCTTCAAAAGAACTCATTTTCATTTCTGGGTTTTGATATTTGCCTTA	TGCAGATCTGAAACTCTTTCGATCTTCAAAAGAACTCATTTTGATTTCTGGGTTTTGATATTTGCCTTA	chr1L	945863232	1	9.88e-28	Plus	42:C>G	0	0	0	0	2	0	0	0	-	0	0	0	0	-	0	0	0	0	0	0	0	0	0	0	0	0	0	0	0	0	2	-	-	0	0	0	0	2	2	0
D16628	3519988	TGCAGATTGCTAGATGAAGGATCTAACAGATCAAGGATCTGTTCATTGTATATCTCCAAGAAAGAACAT	TGCAGATTGCTAGATGAAGGATCTAACAGATCAAGGATCTGTTCATTGTAGATCTCCAAGAAAGAACAC	chr1S	377532097	1	9.88e-28	Minus	68:T>C	0	0	0	0	0	0	-	-	0	0	0	-	0	-	0	0	0	0	0	0	0	0	0	0	0	1	0	0	0	0	0	0	-	0	-	-	0	0	-	-
D16649	13868088	TGCAGCAACTGGACAGTGGTGGGGCAAAAGCCGGACTGGAAGTGGATGGATGGGGAAACAACAATTTTT	TGCAGCAACTGGATAGTGGTGGGGCAAAAGCCGGACTGGAAGTGGATGGATGGGGAAACAACAATTTTT	chr2	1342165444	1	4.6e-26	Minus	13:C>T	0	-	0	0	0	0	0	0	0	0	0	0	0	-	-	0	0	-	-	0	0	0	0	0	0	-	0	-	0	0	0	0	-	0	0	0	0	0	0	0
D16651	13868088	TGCAGCAACTGGACAGTGGTGGGGCAAAAGCCGGACTGGAAGTGGATGGATGGGGAAACAACAATTTTT	TGCAGCAACTGGACAGTGGTGGGGCAAAAGCCGGACTGGAAGTGGATGGATGGGGAGACAACAAATTTT	chr2	1342165401	1	4.6e-26	Minus	56:A>G	0	-	0	0	0	0	0	0	0	0	0	0	0	-	-	0	0	-	1	0	0	0	0	0	0	-	0	-	0	0	0	0	-	0	0	0	0	0	0	0
D16652	13868088	TGCAGCAACTGGACAGTGGTGGGGCAAAAGCCGGACTGGAAGTGGATGGATGGGGAAACAACAATTTTT	TGCAGCAACTGGACAGTGGTGGGGCAAAAGCCGGACTGGAAGTGGATGGATGGGGAAACAACAAATTTT	chr2	1342165393	1	4.6e-26	Minus	64:T>A	0	-	0	0	0	0	0	0	0	0	0	0	0	-	-	0	0	-	1	0	0	0	0	0	0	-	0	-	0	0	0	0	-	0	0	0	0	0	0	0
D16659	3519993	TGCAGCAGACACGACTCCAGCAGAGCAGGTCGGACCAGTTTGTTACGAAAACCAGAAAATGAATCACAG	TGCAGCAGACACGACTCCAGCAGAGCAGGTCGGACCAATTTGTTACGAAGACCAGAAAATGAATCACAG	chr3	810142358	1	9.88e-28	Plus	49:A>G	0	0	0	0	0	0	0	-	0	0	0	0	0	-	0	0	0	0	0	0	0	0	-	0	0	-	0	0	0	-	0	0	0	-	0	0	0	0	0	-
D16660	3519993	TGCAGCAGACACGACTCCAGCAGAGCAGGTCGGACCAGTTTGTTACGAAAACCAGAAAATGAATCACAG	TGCAGCAGACACGACTCCAGCAGAGCAGGTCGGACCAGTTTGTTACGAAAACCAGAAAATGAATCAAAG	chr3	810142375	1	9.88e-28	Plus	66:C>A	0	0	0	2	0	0	0	-	0	0	0	0	0	1	0	0	0	0	0	0	0	0	-	0	0	-	0	0	0	-	0	0	0	-	0	0	0	0	0	-
D16661	3519993	TGCAGCAGACACGACTCCAGCAGAGCAGGTCGGACCAGTTTGTTACGAAAACCAGAAAATGAATCACAG	TGCAGCAGACACGACTCCAGCAGAGCAGGTCGGACCAGTTTGTTACGAAAACCAGAAAATGAATCACAT	chr3	810142377	1	9.88e-28	Plus	68:G>T	0	0	0	0	0	0	0	-	0	0	0	0	0	-	0	0	0	0	0	0	0	0	-	0	0	-	0	0	0	-	0	0	0	-	0	0	0	0	0	-
D16663	3521622	TGCAGTAGCAACAACCCTGAAAGACTGACCAACATATTAGGTGTGCCACAATGAAAATAATAGTCAAAA	TGCAGTAGCAACAACCCTGAAAGACTGACCAACATGTTAGGTGTGCCACAATGAAAATAATAGTCAAAA	chr5	246289968	1	9.88e-28	Plus	35:A>G	0	0	0	0	0	0	0	2	0	0	0	0	0	0	0	0	0	0	-	-	0	0	0	0	0	0	0	0	0	0	0	0	0	0	0	2	0	0	0	2
D16664	3521622	TGCAGTAGCAACAACCCTGAAAGACTGACCAACATATTAGGTGTGCCACAATGAAAATAATAGTCAAAA	TGCAGTAGCAACAACCCTGAAAGACTGACCAACATATTAGGTGTGCCAGAATGAAAATAATAGTCAAAA	chr5	246289981	1	9.88e-28	Plus	48:C>G	0	0	0	0	0	0	0	0	2	0	0	0	0	0	0	0	0	0	-	-	0	0	0	0	0	0	0	0	0	0	0	0	0	0	2	0	0	0	0	0
D16704	3522756	TGCAGCGCAATTCGGGTTTAGATTAGTAGACAGATGGCCTACTGCTGGAAATTCGACTGAAACATCACG	TGCAGCGCAGTTCGGGTTTAGATTAGTAGACAGATGGCCTACTGCCGGAAATTCGACTGAAACATCACG	contig_5374	208724	1	4.6e-26	Minus	9:A>G	0	0	-	0	0	0	0	-	-	0	0	0	0	0	0	-	0	0	0	-	0	0	0	-	-	-	0	0	0	0	-	0	0	0	-	-	0	0	0	0
D16712	3524325	TGCAGCTAAATACTGCTTTTTATGGCAAACAAACTGTGTTGTCAATCGCAGATTGCGGAAAACACATTA	TGCAGCTAAATACTGCTTTTTATGGCAAACAAACTGTGTTGTCAATAGCAGATTGCGGAAAACACATTA	chr2	34736585	1	9.88e-28	Plus	46:C>A	1	2	0	0	0	0	1	0	0	1	0	0	0	0	0	-	0	1	0	0	1	0	0	2	2	0	0	-	0	0	0	-	0	0	0	0	0	0	-	0
D16726	22857003	TGCAGCTCGCATTCTACGTGCAATTAGAATTGCTGCTCGCTTAGGATTTAGTATTTCTAAGGAAACAGC	TGCAGCTCGCATTCTACGTGCAATTAGAATTGCTGCTCGCATAGGCTTTAGTATTTCTAAGGAAACAGC	chr2	965950225	1	9.88e-28	Minus	45:A>C	0	0	0	0	0	0	0	0	0	0	0	0	0	0	0	0	0	0	-	-	0	0	0	0	0	0	0	-	-	0	0	0	0	0	0	-	0	0	0	0
D16728	3527342	TGCAGCTCTGATGACATCGCATGTCCAATCACGTGAGTCCCATACCCATACTACTACTTTTGTTTTTAC	TGCAGCTCTGATGACATCGCATGTCCAATCACGTGAGTCCCATACCCATACTACTACTCCTGTTTTTAC	chr1L	19223181	1	3.55e-27	Minus	58:T>C	0	0	-	0	0	0	0	0	0	0	0	0	0	1	-	-	0	0	0	1	0	0	1	0	0	-	0	-	0	0	-	1	0	0	0	0	0	0	0	0
D16733	39981152	TGCAGCTGCCGAGAACATTGTGTCTATACTTGACGTGGAGACACAGGCCTGCCGATATTCATTACAGAT	TGCAGCTGCCGAGAACATTGTGTCTATACTTGATGTGGAGACACAGGCCTGCCGATATTCATTACAGAT	chr2	1177682573	1	5.37e-25	Plus	33:C>T	0	2	0	0	0	1	0	0	-	0	0	0	0	0	0	0	0	2	0	0	0	0	0	2	0	0	0	0	0	0	0	0	0	-	0	-	0	0	0	0
D16734	3522762	TGCAGCTGCCGCCCTGCTATAGATTTCGAGGATTTCTTTTTTTACTCTATGTTCTTCTAGTGCACCACA	TGCAGCTGCCGCCCTGCTATAGATTTCAAGGATTTCTTTTTTTACTCTATGTTCTTCTAGTGCACCACA	chr2	159257328	1	9.88e-28	Minus	27:G>A	0	0	0	0	0	0	2	0	0	0	0	0	0	-	0	-	0	0	0	0	0	0	0	0	0	0	0	0	0	0	0	0	0	0	0	-	0	0	-	-
D16738	13908947	TGCAGCTGTCAATTCAAGGGAGTCTTGTACCGTTTGTACAATGTGGCAACTACTAATTTTTTTACAGAT	TGCAGCTGTCAATTCAAGGGAGTCTTGTACCGTTTGTACAATGTGGCAACTACTAATTTTTTTAACAAT	chr5	0	1	5.37e-25	Minus	64:C>A	0	0	0	0	0	0	0	0	0	0	0	0	0	0	0	0	0	0	0	0	0	0	0	0	0	-	0	0	0	0	0	0	0	0	0	-	-	0	0	-
D16739	13908947	TGCAGCTGTCAATTCAAGGGAGTCTTGTACCGTTTGTACAATGTGGCAACTACTAATTTTTTTACAGAT	TGCAGCTGTCAATTCAAGGGAGTCTTGTACCGTTTGTACAATGTGGCAACTACTAATTTTTTTAATTCT	chr5	0	1	5.37e-25	Minus	65:A>T	0	0	0	0	0	0	0	0	0	0	0	0	0	0	0	0	0	0	0	0	0	0	0	0	0	-	0	0	0	0	0	0	0	0	0	1	-	0	0	-
D16740	13908947	TGCAGCTGTCAATTCAAGGGAGTCTTGTACCGTTTGTACAATGTGGCAACTACTAATTTTTTTACAGAT	TGCAGCTGTCAATTCAAGGGAGTCTTGTACCGTTTGTACAATGTGGCAACTACTAATTTTTTTAATTTT	chr5	0	1	5.37e-25	Minus	67:A>T	0	0	0	0	0	0	0	0	0	0	0	0	0	0	0	0	0	0	0	0	0	0	0	0	0	-	0	0	0	0	0	0	0	0	0	-	-	0	0	-
D16776	39980939	TGCAGGCAGCAGACAAGGAATGTGAAGCAACTGGTCACATAATCTCTGAAGGAGACTTATTTTTACAGA	TGCAGGCAGCAGACAAGGAATGTGAAGCAACTGGTCACATAATCTCTGAAGGAGACTTATTTTTAATAG	chr3	0	1	1.65e-25	Plus	65:C>A	0	-	0	0	0	0	0	0	0	-	0	0	0	0	0	0	0	0	-	0	-	0	0	0	0	0	0	0	0	0	0	0	-	0	-	0	0	0	0	0
D16777	39980939	TGCAGGCAGCAGACAAGGAATGTGAAGCAACTGGTCACATAATCTCTGAAGGAGACTTATTTTTACAGA	TGCAGGCAGCAGACAAGGAATGTGAAGCAACTGGTCACATAATCTCTGAAGGAGACTTATTTTTAACTT	chr3	0	1	1.65e-25	Plus	66:A>C	0	-	0	0	0	0	0	0	0	-	0	0	0	0	0	0	0	0	-	0	-	0	0	0	0	0	0	0	0	0	0	0	-	0	1	0	0	0	0	0
D16809	32610507	TGCAGGTTATTGCAAAAATCATTGTATATAAAAAGGAAAATCACAGTAGAGCTTGGCATACTTTTACAG	TGCAGGTTATTGCAAAAATCATTGTATATAAAAAGGAAAATCACAATAGAGCTTGGCATACTTTTACAG	contig_8181	91443	1	4.6e-26	Plus	45:G>A	0	0	0	0	0	0	-	0	-	0	0	-	0	-	0	-	0	0	0	0	0	0	0	0	-	0	0	0	-	-	0	0	2	0	-	-	0	0	0	-
D16830	13866855	TGCAGTCGAGAGGGATCCCGCTACCATTGCTTCTGTCACTGCGGGTGTGTTGTGTGGTGCTAATATTGT	TGCAGTCAAGAGGGATCCCGCTACCATTGCTTCTGTCACTGCGGGTGTGTTGTGTGGTGCTAATATTGT	chr1L	866913344	1	9.88e-28	Plus	7:G>A	0	0	0	0	0	2	0	0	0	0	-	0	-	0	0	0	0	0	2	0	1	0	2	0	0	0	-	0	0	0	0	0	-	0	0	-	0	0	-	0
D16847	3524991	TGCAGTCCTCTGAGATGCTCGGTGTCCCCCTATTTGGCGTTAGGCGAAAGCAAATTTTGCATACACTGA	TGCAGTCCTCTGAGATGCTCGGTGTCCCCCTATTTGGCGTTAGGCGAAAGCAAATTTTGCATACACTTA	chr4	1075939215	1	9.88e-28	Plus	67:G>T	0	0	0	0	0	0	0	0	-	0	0	0	0	-	0	0	0	0	-	0	0	-	0	0	0	0	-	0	0	0	0	0	0	0	-	0	0	0	0	0
D16848	13863883	TGCAGTCCTTCCCTTTTGGATCGTTGCACAAGGTTGATACGGGCTTACCTTTAGATTATTTTTCATGTA	TGCAGTCTTTCCCTTTTGGATCGTTGCACAAGGTTGATACGGGCTTACCTTTAGATTATTTTTCATGTA	chr5	880924064	1	9.88e-28	Plus	7:C>T	0	0	0	0	0	0	0	0	0	0	0	0	0	0	0	0	0	0	0	0	0	0	0	0	0	0	0	0	0	-	0	0	0	0	0	0	0	0	0	-
D16849	13863883	TGCAGTCCTTCCCTTTTGGATCGTTGCACAAGGTTGATACGGGCTTACCTTTAGATTATTTTTCATGTA	TGCAGTCCTTCCCTTTTGGATTGTTGCACAAGGTTGATACGGGCTTACCTTTAGATTATTTTTCATGTA	chr5	880924078	1	9.88e-28	Plus	21:C>T	0	0	0	0	2	0	0	0	0	0	0	0	0	0	0	0	0	0	0	0	0	0	0	0	0	0	0	0	0	1	0	0	0	2	0	0	0	0	0	1
D16865	13866725	TGCAGTGATATTTCTCTTGGCTGTTCTTGTGGTGACTGTCCTTCATCTTCAGTATGCTCTAATTCATCT	TGCAGTGATATTTCTCTTGGCTGTTCTTGTGGTGACTGTCCTACATCTTCAGTATGCTCTAATTCATCT	chr2	1342178619	1	9.88e-28	Minus	42:T>A	0	0	0	2	0	0	0	-	0	-	0	0	0	0	1	-	2	0	0	0	0	0	0	0	0	-	0	0	0	0	0	0	1	0	0	0	0	-	0	-
D16871	3523766	TGCAGTGCGGTACCATCTACGTTGAAAACATTCCTCAAACAATCTATATAGAAGTAAAAAATTACAGAT	TGCAGTGCGGTACCATCTACGTTGAAAACATTCCTCAAACAATCTATATAGAAGTAAAAAATTAAGAAA	chr5	0	1	5.37e-25	Minus	64:C>A	0	0	0	0	0	0	0	0	0	0	-	0	0	0	0	0	0	0	0	0	0	0	0	0	0	0	-	0	0	0	0	0	-	0	0	0	0	0	0	0
D16892	32608628	TGCAGTTAGTATCACAATCCACAAGGGCATCTCAATTTAGAAATAAACACAGCAGCCAGAGTCAAAATT	TGCAGTTAGTATCACAATCCACAAGGGCATCTCAATTTAGAAATAAAGACAGCGGCCAGAGTCAAAATC	chr6	1495110805	1	9.88e-28	Plus	47:C>G	0	0	0	2	2	0	0	0	0	0	0	0	2	0	0	0	0	0	0	0	0	0	0	0	0	0	0	0	0	0	0	0	0	0	0	0	0	0	0	0
D16898	18320413	TGCAGTTCTCCCTAATGTCTCCAAAGGTGCAGCCAACTAAACAAATATCACTGCCAATTTTTAGCCACT	TGCAGTTCTCCCTAACGTCTCCAAAGGTGCAGCCAACTAAACAAATATCACTGCCAATTTTTAGCTACT	chr4	410990568	1	9.88e-28	Plus	15:T>C	0	0	0	0	0	0	0	0	-	0	-	0	0	-	0	0	0	0	-	0	0	-	0	2	2	2	0	2	0	0	0	0	0	-	0	-	2	0	0	0
D16903	13869516	TGCAGTTGCCTAAATCCTTCAGCCATCACGTTGGTGAACATTGGATCAAGATCAGACGGTGCAGATTTT	TGCAGTCGCCTAAATCCTTCAGCCACCACGTCGGTGAACATTGGATCAAGATCAGACGGTGCAGATTTT	chr3	1426933510	1	9.88e-28	Minus	6:T>C	0	0	0	0	0	0	-	0	0	-	0	0	0	0	0	-	-	0	0	0	0	0	0	0	-	0	0	-	0	0	0	0	0	0	0	-	0	0	0	-
D16912	39980359	TGCAGTTTGTACTCTTTTACTGTGAAATGTGATGGACTTTTATGAGTATATGAGTTGTTATTTTTTACA	TGCAGTTTGTACTCTTTTACTGTGAAATGTGATGGATTTTTATGAGTATATGAGTTGTTATTTTTTACA	chr3	973891204	1	1.28e-26	Plus	36:C>T	0	0	0	-	0	0	0	0	0	0	0	0	0	-	0	-	0	-	0	0	0	0	0	0	0	-	0	0	0	0	0	0	0	-	0	0	0	0	0	-
D16913	39980359	TGCAGTTTGTACTCTTTTACTGTGAAATGTGATGGACTTTTATGAGTATATGAGTTGTTATTTTTTACA	TGCAGTTTGTACTCTTTTACTGTGAAATTTGATGGACTTTTATGAGTATACGAGTTGTTATTTTTTACA	chr3	973891218	1	1.28e-26	Plus	50:T>C	0	0	0	-	0	0	0	0	0	0	0	0	0	-	0	-	0	-	0	0	0	0	0	0	0	-	0	0	0	0	0	0	0	-	0	0	0	0	0	-
D16914	39980359	TGCAGTTTGTACTCTTTTACTGTGAAATGTGATGGACTTTTATGAGTATATGAGTTGTTATTTTTTACA	TGCAGTTTGTACTCTTTTACTGTGAAATGTGATGGACTTTTATGAGTATATAAGTTGTTATTTTTTACA	chr3	973891219	1	1.28e-26	Plus	51:G>A	2	0	0	-	0	0	0	0	0	0	0	0	0	-	0	-	2	-	0	0	0	0	0	0	0	1	0	0	0	0	0	0	0	-	0	0	0	0	0	-
D16937	3518846	TGCAGATCACCAACTTCATTGACCTAGTCTCTTTCAACAATTGTAAAAAGTCAATATTTTACAGATCGG	TGCAGATCACCTACTTCATTGACCTAGTCTCTTTCAACAATCGTAAAAAGTCAATATTTTACAGATCGG	chr2	513773490	1	2.29e-23	Plus	41:T>C	0	-	0	0	0	0	0	0	0	0	0	0	0	0	-	0	0	0	0	-	0	-	0	0	0	-	0	0	0	0	0	0	0	1	0	0	0	0	0	0
D16946	3509160	TGCAGCATCAGTGCTTCTTATGTTTTAGTTGCCATAATTGGTTTCAGCGACGATATTTCTTTGATCCCT	TGCAGCATCAGTGCTTCTTATGTTTTAGTTGCCATAAAGGGTTTCAGCGACGATATTTCTTTGGTCCCT	chr1L	1454565903	1	9.88e-28	Minus	63:A>G	0	0	0	-	-	0	0	0	0	0	0	0	0	-	-	-	0	0	0	0	0	0	0	0	0	0	0	0	0	0	-	0	0	0	-	0	0	0	0	-
D16959	3522695	TGCAGGAATCAAAAGTTATGCTGTCACAGTAATAAGTGTGTGCACAAGATGCCAAACTTTTCTCATAAC	TGCAGGAATCAAAAGTTATGCTGTCACAGTAATAAGTGCGCGGACAAGATGCCAAACTTTTCTCATAAC	chr3	353864288	1	4.6e-26	Minus	38:T>C	0	-	0	0	0	-	-	0	-	0	-	0	-	-	0	-	0	0	0	0	0	-	0	0	-	0	-	0	0	2	0	0	0	-	0	-	0	0	0	-
D16986	32613218	TGCAGTGGTGTCAAATTTTGCAATCCAACATTAGCTGTTGTTGTTGGATACTGTTATGTCTATTACAGA	TGCAGTGGTGTCAAATTTTGCAATCCAACATTAGCTGTTGTTGTTGGATACTGTTATGTCTATTAATAG	chr1L	0	1	1.65e-25	Plus	65:C>A	0	-	0	0	0	0	0	-	0	0	0	0	0	0	0	-	0	0	-	0	-	-	0	0	0	0	0	0	0	0	0	0	0	-	-	0	0	0	0	-
D17064	39979965	TGCAGATTTCACCTGAATGTTTATCATTGATGTATGAGAAGTTTTTACAGATCGGAAGAGCGGTTCAGC	TGCAGATTTCACCTGAATGTTTATCATTGATGTATGAAAAGTTTTTACAGATCGGAAGAGCGGTTCAGC	chr1L	1515449222	1	8.59e-16	Minus	37:G>A	0	0	2	0	2	0	0	0	0	0	0	0	0	0	0	0	0	0	0	0	0	0	2	-	0	0	0	0	0	0	0	0	0	2	0	0	0	1	2	0
D17109	3519921	TGCAGTCAGGAAGTAAAACTGAAAATTCTAGCGATCGTAGCTTTGAAATTTTTTACAGATCGGAAGAGC	TGCAGTCAGGAAGTAAAACTGAAAATTCTAGCAATCGTAGCTTTGAAATTTTTTACAGATCGGAAGAGC	chr2	276498515	1	4.09e-20	Plus	32:G>A	0	0	0	0	0	0	0	0	0	2	0	0	0	0	0	0	0	0	0	0	0	0	0	2	0	0	0	0	0	0	0	0	0	0	0	0	0	0	0	0
D17110	3519921	TGCAGTCAGGAAGTAAAACTGAAAATTCTAGCGATCGTAGCTTTGAAATTTTTTACAGATCGGAAGAGC	TGCAGTCAGGAAGTAAAACTGAAAATTCTAGCAATCGTAGCTTTGAGATTTTTTACAGATCGGAAGAGC	chr2	276498529	1	4.09e-20	Plus	46:A>G	0	0	0	0	0	0	0	0	0	0	0	0	0	0	0	0	0	0	0	0	0	0	0	0	0	0	0	0	0	0	0	0	0	0	0	0	0	0	0	0
D17161	3526010	TGCAGGATCATATCACACCAGCTAGCTATCAATGAAAACTTCATTATACGATTTGAATTACAGATCGGA	TGCAGGATCATATCACACCCGCTAGCTATCAACGAAAACTTCATTATACGATTTGAATTACAGATCGGA	chr3	210074061	1	8.01e-23	Minus	19:A>C	0	0	0	-	0	0	0	0	-	-	-	0	0	0	0	0	0	0	0	0	0	0	0	-	0	0	0	0	0	0	-	0	0	0	0	0	0	0	0	0
D17162	3526010	TGCAGGATCATATCACACCAGCTAGCTATCAATGAAAACTTCATTATACGATTTGAATTACAGATCGGA	TGCAGGATCATATCACACCAGCTAGTTATCAATGAAAACTTCATTATACGATTTGAATTACAGATCGGA	chr3	210074055	1	8.01e-23	Minus	25:C>T	0	0	0	-	0	0	0	0	-	-	-	0	0	0	0	0	0	0	0	0	0	0	0	-	0	0	0	0	0	0	1	0	0	0	0	0	0	0	0	0
D17163	3526010	TGCAGGATCATATCACACCAGCTAGCTATCAATGAAAACTTCATTATACGATTTGAATTACAGATCGGA	TGCAGGATCATATCACACCAGCTAGCTATCAACGAAAACCTCATTATACGATTTGAATTACAGATCGGA	chr3	210074041	1	8.01e-23	Minus	39:T>C	0	0	0	-	0	0	0	0	-	-	-	0	0	0	0	0	0	0	0	0	0	0	0	-	0	0	0	0	0	0	-	0	0	0	0	0	0	0	0	0
D17218	13867366	TGCAGAACATAAGGCATGACCACTTTTCAAATATTTTTTTGGACAGATTACATAATTATTCTATTACAG	TGCAGAACATAAGGCATGACCACTTTTCAAATATTTTTTTGGACAGATTACATAATTATTCTACTAACA	chr1L	1441119710	1	4.6e-26	Plus	63:T>C	0	0	1	2	0	0	0	-	0	1	-	0	0	0	1	0	2	0	0	0	0	0	-	0	0	0	0	0	0	0	1	0	0	0	2	0	0	0	0	0
D17225	39981080	TGCAGAAGATCCAGCTGTCAATGAAGCTAGCATTATCTGCATATATGTAGTATAGAGTCAATTACAGAT	TGCAGAAGATCCAGCTGTCAATGAAGCTAGCATTATCTGCATATATGTAGTATAGAGTCAATTAATGTA	chr1S	0	1	5.37e-25	Minus	64:C>A	0	0	0	0	0	0	0	0	0	1	-	0	0	0	-	0	0	0	0	0	0	0	0	0	0	0	-	0	0	0	0	0	-	0	0	0	0	-	0	0
D17226	3523503	TGCAGAAGGAAGAAAACATACTACAAAAGAAAAAATTGAATCGATAGATGATGACAATAAGATAATAAA	TGCAGAAGGAAGAAAACATACTACAAAAGAAAAAATCGAATCTATAGATGATGACAATAAGATAATAAA	contig_4299	69957	1	9.88e-28	Plus	36:T>C	0	0	0	-	0	0	0	0	0	0	-	0	0	-	-	0	0	-	-	0	0	0	-	0	0	0	0	2	0	0	0	-	0	0	0	-	0	2	0	0
D17280	39980250	TGCAGAGCAGGATCATATTTAGAAGCATTGATATCCAGAATGTCTTGTCTGCTGATTTGTATTTTTACA	TGCAGAGCAGAATCATATTTAGAAGCATTGATATCCAGAATGTCTTGTCCGCTGATTTGTATTTTTACA	chr5	804883126	1	1.28e-26	Plus	10:G>A	0	0	0	0	0	0	0	0	0	-	0	-	0	0	0	-	0	-	0	0	0	-	0	-	0	0	0	0	0	0	0	0	0	-	0	0	0	-	0	-
D17281	39980250	TGCAGAGCAGGATCATATTTAGAAGCATTGATATCCAGAATGTCTTGTCTGCTGATTTGTATTTTTACA	TGCAGAGCAGGATCATATTTAGAAGCACCGATATCCAGAATGTCTTGTCTGCTGATTTGTATTTTTACA	chr5	804883143	1	1.28e-26	Plus	27:T>C	0	0	0	0	0	0	0	0	0	-	0	-	0	0	0	-	0	-	0	0	0	-	0	-	0	0	0	0	0	0	0	0	0	-	0	0	0	-	0	-
D17282	39980250	TGCAGAGCAGGATCATATTTAGAAGCATTGATATCCAGAATGTCTTGTCTGCTGATTTGTATTTTTACA	TGCAGAGCAGGATCATATTTAGAAGCATCGATATCCAGAATGTCTTGTCTGCTGATTTGTATTTTTACA	chr5	804883144	1	1.28e-26	Plus	28:T>C	0	0	0	0	0	0	0	0	0	-	0	1	0	0	0	-	0	-	0	0	0	-	0	-	0	0	0	0	0	2	2	2	0	-	0	0	0	-	0	-
D17318	39981107	TGCAGATTGGAAAGCTTGCTTATTTGAGAAGGCAACCTTTCAATATTAGTGTGAGAAAGATTTACAGAT	TGCAGATTGGAAAGCTTGCTTATTTGAGAAGGCAACCTTTCAATATTAGTGTGAGAAAGATTTAATTTC	chr2	0	1	5.37e-25	Minus	64:C>A	0	0	0	0	0	0	-	0	-	0	0	-	0	0	0	0	0	0	0	0	0	-	0	-	0	0	0	0	0	0	0	0	0	0	0	0	0	0	0	0
D17361	39980652	TGCAGCATTATTTGAAATTTTGAGCGCGTGGAATCTTATGTATTCTTCTTTTGATGACTTCTTTTACAG	TGCAGCATTATTTGAAACTTTGAGGGCGTGGAATCTTATGTATTCTTCTTTTGATGACTTCTTTTACAG	chr2	1099028001	1	4.6e-26	Minus	17:T>C	0	0	0	0	0	0	-	0	0	0	0	0	0	0	-	0	0	0	0	0	0	-	0	0	0	-	0	0	0	0	0	0	0	0	-	-	0	0	0	-
D17362	39980652	TGCAGCATTATTTGAAATTTTGAGCGCGTGGAATCTTATGTATTCTTCTTTTGATGACTTCTTTTACAG	TGCAGCATTATTTGAAATTTTGAGGGCGTGGAATCTTATGTATTCTTCTTTTGATGACTTCTTTTACAG	chr2	1099027994	1	4.6e-26	Minus	24:C>G	0	0	0	0	0	0	-	0	0	0	0	0	0	0	-	0	0	0	0	0	0	-	0	0	0	-	0	0	0	0	0	0	0	0	1	-	0	0	0	-
D17384	39981082	TGCAGCTGACTTTTTAGTTGCTGCTTCTGATTGTGAAGCTGTATCAATGCCTGAAGTTCTTTTACAGAT	TGCAGCTGACTTTTTAGTTGCTGCTTCTGATTGTGAAGCTGTATCAATGCCTGAAGTTCTTTTAAAAAA	chr2	0	1	5.37e-25	Minus	64:C>A	0	0	0	0	0	0	0	0	0	0	0	0	0	0	0	0	0	0	0	-	0	0	0	0	0	0	0	2	0	0	0	0	0	-	0	0	0	0	0	-
D17416	13865133	TGCAGGATTTATTGGGGTCTGGAAAAGTAAAACAAAAGGATTGATGCATAATGATGAAATTTGCTTGAA	TGCAGGATTTACTGGGGTCTGGAAAAGTAAAACAAAAGGATTGATGCATAATGATGGAATTTGCTTGAA	chr6	1003138224	1	9.88e-28	Minus	11:T>C	0	0	0	0	0	0	0	0	0	0	0	0	0	0	0	0	0	0	-	0	0	0	0	0	0	0	0	0	0	0	0	0	0	0	0	0	0	0	0	0
D17417	13865133	TGCAGGATTTATTGGGGTCTGGAAAAGTAAAACAAAAGGATTGATGCATAATGATGAAATTTGCTTGAA	TGCAGGATTTATTGGGGTCTGGAAAAGTAAAACAAAAGGATTGATGCATACTGATGAAATTTGCTTGAA	chr6	1003138185	1	9.88e-28	Minus	50:A>C	0	0	0	0	0	0	0	2	0	0	2	0	0	0	0	0	0	2	-	0	0	0	0	0	0	0	0	0	0	0	0	0	0	0	0	0	0	0	2	0
D17451	39980849	TGCAGGTGTAAATGAGCGATGCTTGGAACTTCAAAAGAAAAAGAAAAATGATGCGTCAAAAGTTACAGA	TGCAGGTGTAAATGAGCGATGCTTGGAACTTCAAAAGAAAAAGAAAAATGATGCGTCAAAAGTTAATAA	chr2	0	1	1.65e-25	Plus	66:A>T	0	0	0	0	0	0	0	0	-	0	0	0	0	-	0	-	0	0	0	-	0	0	0	-	0	0	-	-	0	0	0	0	0	0	-	-	0	0	0	2
D17452	39980849	TGCAGGTGTAAATGAGCGATGCTTGGAACTTCAAAAGAAAAAGAAAAATGATGCGTCAAAAGTTACAGA	TGCAGGTGTAAATGAGCGATGCTTGGAACTTCAAAAGAAAAAGAAAAATGATGCGTCAAAAGTTAACTG	chr2	0	1	1.65e-25	Plus	68:A>G	0	0	0	0	0	0	0	0	-	0	0	0	0	-	0	-	0	0	0	-	0	0	0	-	0	0	-	-	0	0	0	0	0	0	-	-	0	0	0	0
D17636	13909108	TGCAGTCGACGACAGCTGCGCCCAGTGTAATAAAATGTCATGAATAGAGGTGACAACAAATATTACAGA	TGCAGTCGACGACAGCTGCGCCCAGTGTAATAAAATGTCATGAATAGAGGTGACAACAAGTATTACAGA	chr4	1592807449	1	1.65e-25	Plus	59:A>G	0	-	0	0	0	0	0	0	-	0	0	0	0	2	0	0	0	0	-	0	0	0	0	0	0	0	0	-	0	1	-	0	0	0	0	-	0	0	0	-
D17638	3518194	TGCAGGACGTCGGTTTCCCATATGGATTCACCAAATATTGTAGAAATGGGCATTTCTCAAATGTTACAG	TGCAGGACGTCGGTTTCCCATATGGATTCACCAAATATTGTAGAAATGGGCATTTCTCAAATGTTAATC	chr1L	0	1	4.6e-26	Plus	67:A>T	0	0	0	0	0	-	0	0	-	0	0	0	0	0	0	-	0	0	0	0	-	0	0	-	-	0	0	0	0	0	0	0	-	0	0	0	0	-	0	0
D17667	3526624	TGCAGAAGATCATGGTTTGATGAATTGATAGTGTAAAAGTTTTTACAGATCGGAAGAGCGGTTCAGCAG	TGCAGAAGATCATGGTGTTATGAATTGATAGTGTAAAAGTTTTTACAGATCGGAAGAGCGGTTCAGCAG	chr1L	669581376	1	1.01e-14	Plus	16:T>G	1	0	0	0	0	0	0	0	0	0	0	0	0	-	0	0	0	0	0	-	0	0	0	-	0	-	0	0	0	0	0	0	0	-	0	-	0	0	0	0
D17668	3526624	TGCAGAAGATCATGGTTTGATGAATTGATAGTGTAAAAGTTTTTACAGATCGGAAGAGCGGTTCAGCAG	TGCAGAAGATCATGGTTAGATGAATTGATAGTGTAAAAGTTTTTACAGATCGGAAGAGCGGTTCAGCAG	chr1L	669581377	1	1.01e-14	Plus	17:T>A	-	0	0	0	0	0	0	0	0	0	0	0	0	-	0	0	0	0	0	-	0	0	0	-	0	-	0	0	0	0	0	0	0	-	0	-	0	0	0	0
D17669	3526624	TGCAGAAGATCATGGTTTGATGAATTGATAGTGTAAAAGTTTTTACAGATCGGAAGAGCGGTTCAGCAG	TGCAGAAGATCATGGTTTGATGAATCGATAGTGTAAAAGTTTTTACAGATCGGAAGAGCGGTTCAGCAG	chr1L	669581385	1	1.01e-14	Plus	25:T>C	-	0	0	0	0	0	0	0	0	0	0	0	0	-	0	0	0	0	0	-	0	0	0	-	0	1	2	0	0	0	0	0	0	-	0	-	2	0	0	0
D17670	3526624	TGCAGAAGATCATGGTTTGATGAATTGATAGTGTAAAAGTTTTTACAGATCGGAAGAGCGGTTCAGCAG	TGCAGAAGATCATGGTTTGATGAATTGATAGGGTAAAAGTTTTTACAGATCGGAAGAGCGGTTCAGCAG	chr1L	669581391	1	1.01e-14	Plus	31:T>G	-	0	0	0	0	0	2	0	0	2	0	0	2	1	2	0	0	0	0	-	0	2	0	1	0	-	0	0	2	2	0	0	0	-	0	1	2	0	0	0
D17718	13913387	TGCAGTACAGAGAAGGCTTCGGCATCTCTTCTATCTTGACCAAAAGCGTTGATTACAGATCGGAAGAGC	TGCAGTACAGAGAAGGCTTCAGCATCTCTTCTATCTTGACCAAAAGCGTTGATTACAGATCGGAAGAGC	chr2	1336337308	1	4.09e-20	Minus	20:G>A	2	0	-	-	1	0	0	-	-	0	0	1	0	0	0	0	0	0	0	2	2	2	0	0	0	-	0	-	0	0	-	0	0	-	0	0	-	0	0	0
D17778	39980241	TGCAGAAACTGGAACATACCGGTGGATGGCTCCAGAGGTATGTGTATGTGTTGATTACTTCCTTTTACA	TGCAGAAACTGGAACATACCGGTGGATGGCTCTAGAGGTATGTGTATGTGTTGATTACTTCCTTTTACA	chr3	1594456658	1	1.28e-26	Minus	32:C>T	0	-	-	0	0	0	0	0	0	0	-	-	0	0	0	0	0	0	0	0	0	0	0	0	0	-	-	0	0	0	0	0	0	-	0	0	0	0	0	0
D17809	3512353	TGCAGACACTTGCTTGAAAGTCATAGTTGGAGAATATCTTTGTATCTGCATAAGCATAAAGGCATTGTT	TGCAGACACTTGCTTGAAAGTTATAGTTGGAGAATATCTTTGTATCTGCATAAGCATAAAGGCATTGTT	chr1L	236334570	1	9.88e-28	Plus	21:C>T	0	0	-	0	0	0	0	0	1	-	0	0	0	0	-	-	0	1	0	0	0	0	0	0	0	0	0	0	0	0	0	0	0	-	0	0	0	0	0	0
D17838	3519055	TGCAGAGTAATACTACAGTTCATTTCTATTATTTCTAGCTTAGAGTTTACGGTATACAACGTATATTTT	TGCAGAGTAATCCTACAGTTCATTTCTATTATTTCTAGCTTAGAGTTTACGGTATACAACGTATATTTT	chr2	1667438763	1	9.88e-28	Plus	11:A>C	0	0	0	0	0	0	0	0	0	-	-	1	0	-	0	-	0	0	0	0	0	0	0	0	0	0	0	-	0	1	0	0	-	-	0	-	0	0	1	1
D17888	3522979	TGCAGCGAGAAACAAGGAACGTTAGAATGTTAGATTGTGTGATGCAAGGCTTGGCTTGAAGTTGTTTAC	TGCAGCGAGAAACAAGGAACGTTAGAATGTTAGACTGTGTGATGCAAGGCTTGGCTTGAAGTTGTTTAC	contig_6051	79645	1	1.65e-25	Plus	34:T>C	0	-	0	0	0	0	-	1	0	0	0	0	0	-	0	2	0	0	-	0	0	0	0	0	0	0	2	0	0	0	0	0	0	0	0	0	0	2	0	0
D17889	3522979	TGCAGCGAGAAACAAGGAACGTTAGAATGTTAGATTGTGTGATGCAAGGCTTGGCTTGAAGTTGTTTAC	TGCAGCGAGAAACGAGGAACGTTAGAATGTTAGATTGTGTGATGCAAGGCTTGGCTTGAGGTTGTTTAC	contig_6051	79670	1	1.65e-25	Plus	59:A>G	0	-	0	0	0	0	-	-	0	0	0	0	0	-	0	0	0	0	-	0	0	0	0	0	0	0	0	0	0	0	0	0	0	0	0	0	0	0	0	0
D17897	3521912	TGCAGCTATGGCAGCAACCACCAAAAGATAGCTTGCTCAAGTTGATATTCATGTAGCACAACATGCAAG	TGCAGCTATGGCAGCAACCTCCAAAAGATAGCTTGCTCAAGTTGATATTCATGTAGCACAACATGCAAG	chr1L	353034560	1	4.6e-26	Minus	19:A>T	0	0	-	2	2	0	0	0	-	0	0	-	0	-	0	0	0	0	-	0	0	0	0	0	0	0	0	0	0	0	-	-	0	-	0	0	0	0	0	0
D17920	13911651	TGCAGGAACTCTTATTCTTTCTGATGCCTCACCTCCTACTATGCCTTCACTCCTTGTTTTACAGATCGG	TGCAGGAACTCTTATTCTTTCTGATGCCTCACCACCCACTATGCCTTCACTCCTTGTTTTACAGATCGG	chr6	1476631628	1	2.29e-23	Minus	33:T>A	0	-	0	-	0	0	0	0	0	0	0	0	0	0	-	-	0	0	0	-	0	-	0	-	0	0	0	0	0	0	0	0	0	1	0	0	0	0	-	0
D17928	13912924	TGCAGGACATACTCAACAAGCAACCACGGTCAACCATGTCCAAACCAGCAAAACAATTATATTACAGAT	TGCAGGACATACTCAACAAGCAACCACGGTCAACCATGTCCAAACCAGCAAAACAATTATATTAATAAT	chr2	0	1	5.37e-25	Minus	66:G>A	0	0	0	0	0	0	0	0	0	0	0	0	0	0	0	0	0	0	0	0	0	0	0	0	0	0	0	-	0	0	0	0	-	0	0	0	0	0	0	0
D17956	32612438	TGCAGGTACTGTTCTATTCTGCATGTGATCCAGCTATAGATTTTCCTTTTCAGTTTTGTGTTTTTTACA	TGCAGGTACTGTTTTATTCTGCATGTGATCCAGCTATAGATTTTCCTTTTCAGTTTTGTGTTTTTTACA	chr2	994073043	1	1.28e-26	Plus	13:C>T	0	0	0	0	0	0	-	0	0	0	-	0	0	0	0	-	0	0	-	0	0	0	1	0	2	1	1	0	0	0	0	0	1	0	0	0	0	0	0	0
D17957	32612438	TGCAGGTACTGTTCTATTCTGCATGTGATCCAGCTATAGATTTTCCTTTTCAGTTTTGTGTTTTTTACA	TGCAGGTACTGTTTTATTCTGCATGTGATCCAGCTATAGATTTTCCTTTTCAGTTTTGTGTTTTTTAAC	chr2	0	1	1.28e-26	Plus	67:C>A	0	0	0	0	0	0	-	0	0	0	-	0	0	0	0	-	0	0	-	0	0	0	-	0	0	-	1	0	0	0	0	0	-	0	0	0	0	0	0	0
D17971	39980973	TGCAGGTTTTCCTGCAAGTGCCTGTGTGCGCCATAGGCCTCCAGTTGCATCTAAGAATGCTTTACAGAT	TGCAGGTTTTCCTGCAAGTGCCTGTGTGCGCCATAGGCCTCCAGTTGCATCTAAGAATGCTTTAACATA	chr6	0	1	5.37e-25	Plus	64:C>A	0	-	0	0	0	0	0	0	0	0	0	0	0	0	0	0	0	0	0	0	0	0	0	-	0	0	0	0	0	0	0	-	0	0	0	0	0	0	0	0
D17976	3524057	TGCAGTAAAGGAGCTACAAAAGGTCAATAACAAAAGCAAAGAAGCGTTGTAAACGACGCAACAATTTGA	TGCAGTAAAGGAGCTACAAAAGGTCAATAACAAAAGCAAAGAAGCATTGTAAACGACGCAACAATTTGA	chr6	1386361762	1	9.88e-28	Plus	45:G>A	1	0	0	0	0	0	0	-	0	0	-	-	-	1	-	-	0	0	2	0	0	0	-	0	0	0	0	-	0	2	1	0	1	0	0	0	2	0	0	0
D17983	3520776	TGCAGTAACAGAATTCATGTATGTCACTTGGTCATATTCAAAGAAAAACTACATCAAAATTTTTACAGA	TGCAGTAACAGAATTTATGTATGTCACTTGGTCATATTCAAAGAAAAACTACATCAAAATTTTTACAGA	chr2	1224836698	1	1.65e-25	Plus	15:C>T	0	0	2	0	2	2	-	0	0	0	0	0	0	-	0	0	0	0	0	0	2	0	0	0	0	0	-	-	0	0	0	0	-	0	0	2	0	0	0	0
D18009	13910837	TGCAGTCATAATGCTGTAGTATGTAAATTTTGATCATTAGATGGAGATCGGCTGGTTTGAGTTTTACAG	TGCAGTCATAATGCTCTAGTATGTAAATTTTGATCATTAGATGGAGGTCGGCTGGTTTGAGTTTTACAG	chr3	1491635949	1	4.6e-26	Minus	46:A>G	0	0	0	0	0	0	0	0	0	0	0	0	0	0	0	0	0	0	0	0	0	0	0	0	0	0	0	0	0	0	0	0	-	0	0	-	0	0	0	-
D18030	3524690	TGCAGTGGGGATTTTGGCACAACACGTTTACGGGTATCAGCCTATTCCTGAAGGCTCTAGCGAATCTCA	TGCAGTGGGGATTTTGGCACAACACGTTTACGGGTATCAGCCTATTTCTGAAGGCTCTAGCGAATCTCA	chr1L	79317401	1	9.88e-28	Plus	46:C>T	0	0	0	0	0	0	0	-	0	-	0	0	0	0	0	0	0	0	0	-	0	0	0	-	0	0	-	0	0	0	0	0	0	0	-	0	0	0	0	0
D18031	3524690	TGCAGTGGGGATTTTGGCACAACACGTTTACGGGTATCAGCCTATTCCTGAAGGCTCTAGCGAATCTCA	TGCAGTGGGGATTTTGGCACAACACGTTTACGGGTATCAGCCTATTCCTGAAGGCTCTAACGAATCTCA	chr1L	79317414	1	9.88e-28	Plus	59:G>A	0	0	0	0	0	0	0	-	0	-	2	0	2	0	0	0	0	0	0	-	0	0	0	-	0	0	-	0	0	0	0	0	0	0	1	0	0	0	0	0
D18080	3523777	TGCAGGTGAACCTGTAGAATATTTTTTCTACAGATGAACTGGGTATTTCTAGTTGTGATTTATAATATT	TGCAGGTGAACCTGTAGAATATTTTTTATACAGATGAACTGGGTATTTCTAGTTGTGATTTATAATATT	chr1S	939327569	1	2.14e-24	Plus	27:C>A	0	0	0	0	0	0	0	0	0	0	0	0	0	0	0	0	0	0	-	2	-	-	0	0	0	0	0	-	0	0	0	0	0	-	0	0	0	0	0	-
D18098	39980974	TGCAGTATTCTTTGCTTCCTGTAGCTTCGACCCAAGCTTTTGAAGGTACTTTTCAGTTGCTTTACAGAT	TGCAGTATTCTTTGCTTCCTGTAGCTTCGACCCAAGCTTTTGAAGGTACTTCTCAGTTGCTTTACAGAT	chr4	1304320429	1	5.37e-25	Minus	51:T>C	0	-	-	-	0	0	0	2	0	1	-	-	0	0	0	0	0	0	0	-	0	0	0	0	0	0	0	0	0	0	0	0	0	-	0	0	0	0	-	-
D18156	32612986	TGCAGCTAAAATAAAACATTCCGTGATTGTGATATCTATTAGAGAAATTTTTTACAGATCGGAAGAGCG	TGCAGCTAAAATAAAACATTCCGTGATTGTGATATCTATTAGAGAAGTTTTTTACAGATCGGAAGAGCG	chr2	677461088	1	5.1e-19	Plus	46:A>G	0	0	0	0	0	0	0	0	0	-	1	0	2	-	0	0	0	0	0	0	-	0	0	-	0	0	0	0	0	0	0	0	-	0	0	0	0	0	0	0
D18158	3508300	TGCAGGAAAAATTCCTATTGGATGTCGATGGGTTTATAGAATTACAGATCGGAAGAGCGGTTCAGCAGG	TGCAGGAAAATTTCCTATTGGATGTCGATGGGTTTATAGAATTACAGATCGGAAGAGCGGTTCAGCAGG	contig_7113	212053	1	3.42e-14	Plus	10:A>T	0	0	0	0	0	0	0	0	-	0	0	0	0	-	0	-	-	0	0	0	0	0	0	0	0	0	-	0	0	0	0	0	0	0	0	0	0	0	0	0
D18226	3517763	TGCAGAAAATTTAGAGATGTAATTGACGGACTGAATTGCACGCTATTTAGAGATTTCTTCACACTATCT	TGCAGAAAATTTAGAGATGTAATTGACGGACTGAATTGCACGCTATTTAGAGATTTATTCACACTCTCC	chr1S	1053185629	1	9.88e-28	Minus	56:C>A	0	-	0	2	0	0	0	0	0	2	-	0	0	0	0	-	0	0	0	0	0	0	0	0	0	0	0	0	0	0	0	0	0	0	0	0	0	0	2	0
D18308	3519587	TGCAGGAACAAGAACATCACAATCTTGAACCAAAATTGATTTGGGATCAATTGAATCACCACCATGAAA	TGCAGGAACAAGAACATCACAATCTTCAACCAGAATTGATTTGGGATCAATTGAATCACCACCATGAAA	chr1S	1277708377	1	9.88e-28	Plus	32:A>G	0	0	0	0	0	0	0	0	0	0	0	0	0	-	0	0	0	0	0	0	-	0	0	-	0	0	0	-	0	0	0	0	-	0	0	-	-	0	-	-
D18320	32613356	TGCAGGGGAACTAGAATCAGAAAATGCAGGTAAGGTGTTTCATGACTTATCATGATTTCTTTTTACAGA	TGCAGGGGAACTAGAATCAGAAAATGCAGGTAAGGTGTTTCATGAATTATCATGATTTCTTTTTTTACA	contig_7075	23989	1	1.65e-25	Minus	45:C>A	0	0	0	-	0	0	0	0	0	0	0	0	0	-	2	0	0	0	0	0	0	0	0	0	0	0	0	0	0	0	0	1	0	0	0	-	0	0	0	1
D18345	13869129	TGCAGTAAAAACTCCAACTAGTAAAACACAGATATGAGTTGTGCAAACACAAGTAAAGCATTGTTTACA	TGCAGTAAAAACTACAACTAGTAAAACACAGATATGAGTTGTGCAAACACAAGTAAAGCATTGTTTACA	chr3	114359279	1	1.28e-26	Plus	13:C>A	0	0	0	-	0	0	0	0	0	0	0	0	0	-	0	0	-	0	-	0	0	2	0	-	0	0	0	0	0	0	0	0	0	0	-	0	0	1	0	-
D18453	18321449	TGCAGAGATATGTAGCAACATCAAAGAGCCAAAATACTTTACAGATCGGAAGAGCGGTTCAGCAGGAAT	TGCAGAGTTATGTAGTATCATCAAAGAGCCAAAATACTTTACAGATCGGAAGAGCGGTTCAGCAGGAAT	chr3	1206285206	1	1.33e-12	Plus	7:A>T	-	0	0	0	0	0	-	0	0	0	0	0	0	0	0	0	0	0	-	0	0	0	0	0	0	0	0	0	0	0	0	0	-	0	0	0	0	0	0	0
D18454	18321449	TGCAGAGATATGTAGCAACATCAAAGAGCCAAAATACTTTACAGATCGGAAGAGCGGTTCAGCAGGAAT	TGCAGAGATATGTAGCAACACCAAAGAGCCAAAATACTTTACAGATCGGAAGAGCGGTTCAGCAGGAAT	chr3	1206285219	1	1.33e-12	Plus	20:T>C	-	0	0	0	0	0	-	0	0	0	0	0	0	0	0	0	0	0	-	0	0	0	0	0	0	0	0	0	2	0	0	0	-	0	0	0	0	0	0	0
D18459	13912965	TGCAGATCGAGGTTTGTTGTTTGTTTCATCTTTCTAGCAAGAATTATTTTACAGATCGGAAGAGCGGTT	TGCAGATCGAGGTTTGTTGTTTGTTTCATCTTTCTAGCAAAAAATGATTTACAGATCGGAAGAGCGGTT	chr6	979368051	1	5.87e-18	Plus	46:T>A	0	0	0	0	0	0	0	0	0	0	0	0	0	1	0	0	0	0	0	-	0	0	0	0	-	0	0	0	0	0	0	0	-	0	0	0	0	0	0	0
D18464	13912425	TGCAGCAGCTGCTGCTGATTCTAAGCTCAAGGCTTCTAATTTTCCTGCTACTGTTTTACAGATCGGAAG	TGCAGCAGCAGCTGCTGATTCTAAGCTCAAGGCTTCTAATTTTCCTGCTACTGTTTTACAGATCGGAAG	chr2	1696639892	1	4.53e-20	Minus	9:T>A	0	-	0	0	0	0	0	2	0	0	-	0	0	0	-	0	0	0	1	0	1	-	0	0	0	2	0	0	0	2	0	0	0	0	0	0	0	0	-	-
D18511	13911511	TGCAGAAGAAACAGCAGATATATTTCAACAGACCCCGTGTTACTCTTCAAATAGAAGAAGTGTTTACAG	TGCAGAAGAAACAGCAGATATATTTCAGCAGACCCCATGTTACTCTTCAAATAGAAGAAGTGTTTACAG	chr5	156298205	1	7.75e-19	Plus	27:A>G	0	0	-	0	-	0	-	0	0	0	0	-	0	0	0	0	0	0	-	0	0	0	-	0	0	-	0	0	0	0	0	0	0	-	-	-	0	0	0	0
D18577	3518634	TGCAGCTGCTGCTCAGATGCAGCACCGAAAGAACCGGGAGAAGTGAGGCTGACACCGTAGCCTGCAATG	TGCAGCTGCTGCTCCGATGCAGCACCGAAAGAACCGGGAGAAGTGAGGCTGACACCGTACCCTGCAATG	chr1L	1235087690	1	9.88e-28	Plus	14:A>C	0	0	0	0	0	0	0	0	0	0	0	0	0	0	0	0	0	0	-	0	-	0	0	0	0	0	0	0	0	0	0	0	0	0	0	2	0	0	0	-
D18605	18321040	TGCAGTACCTCAAATACTTCACTCATAGAGGGCCTCAATTCCTTCTCATCTTGCAAACACCGGAAGGCC	TGCAGTACCTCCAATACATCACTCATAGAGGGTCTCAATTCCTTCTCATCTTGCAAACACTGGAAGGCC	chr1S	1550317519	1	9.88e-28	Plus	11:A>C	0	-	0	0	0	0	0	0	0	-	0	0	0	0	0	0	2	0	0	0	0	0	0	0	0	0	0	0	0	0	0	0	0	0	0	1	0	0	-	-
D18615	39980964	TGCAGTGACTTCATGTACTCAATTGCCTCGTCGAGGATAGACTCTTCGTCAAACTATGAATTACAGATC	TGCAGTGACTTCATGTACTCAATTGCCTCATCGAGGATAGACTCTTCGTCAAACTATGAATTACAGATC	chr5	910236852	1	1.88e-24	Minus	29:G>A	0	0	0	0	0	0	0	0	0	1	0	0	0	0	0	2	1	0	0	0	0	0	0	0	0	0	0	0	0	0	0	0	-	0	0	0	0	-	0	-
D18630	3520514	TGCAGTTGATGAAGATGACGAGGATGATGAGTGAAATGCATTTGTATGCATCCAAGAGACAGATATCTA	TGCAGTTGATGAAGATGACGAGGATGATGAGTGAAATGCATTTTTATGCATCCAAGAGACAGATATCTA	contig_5838	246777	1	4.6e-26	Minus	43:G>T	2	0	0	0	0	0	0	0	0	2	0	-	0	-	0	1	0	0	0	0	-	0	0	0	0	-	0	1	0	2	0	0	-	-	0	-	0	0	0	0
D18633	3514176	TGCAGTTGCTCTCAGACTATGATTGGACTTTTTCTCCCTTGGTTGTTGACATCAATAATGACTTACAGA	TGCAGTTGCTCTCAGACTATGATTGGACTTTTTCTCCCCTGGTTGTTGACATCAATAATGACTTACAGA	chr1L	1040882016	1	1.65e-25	Plus	38:T>C	0	0	0	-	0	1	0	0	0	0	0	-	-	0	0	-	0	0	0	0	0	-	0	1	0	0	-	0	0	0	0	0	-	-	0	-	0	0	0	0
D18658	39978857	TGCAGTGCTGTGTTTTTCCCTCACACAAAAATTGAAACAATCATGAGAACGATCTGGACATGCTCCCAA	TGCAGTGCTGTGTTTTTCCCTCACACAAAAATTGAAACAATCGTGAGAGCGATCTGGACATGCTCCCAA	chr1S	1064325568	1	9.88e-28	Plus	42:A>G	0	0	0	0	0	0	0	0	0	0	-	0	0	0	0	0	0	0	0	0	0	0	0	0	0	0	0	0	0	0	0	0	0	0	0	0	0	0	-	0
D18660	39978857	TGCAGTGCTGTGTTTTTCCCTCACACAAAAATTGAAACAATCATGAGAACGATCTGGACATGCTCCCAA	TGCAGTGCTGTGTTTTTCCCTCACACAAAAATTGAAACAATCATGAGAGCGATCTGGACATGCTCCCAA	chr1S	1064325574	1	9.88e-28	Plus	48:A>G	0	0	0	0	0	0	0	0	0	0	-	0	0	0	0	0	0	0	0	0	0	0	0	0	0	0	0	0	0	0	0	0	0	0	0	0	0	0	-	0
D18669	39980679	TGCAGATGTCTGCGCTGAACATCTATCACTGTTATCTGCTCCACAGTTTTGGAAGCAATAAAGTTACAG	TGCAGATGTCTGCGCTGAACATCTATCACTGTTATCTGCTCCACAGTTTTGGAAGCAATGAAGTTACAG	chr3	93350790	1	4.6e-26	Minus	59:A>G	-	0	0	0	0	0	0	0	0	0	-	-	0	-	0	0	0	0	-	-	0	0	0	0	-	0	0	-	0	0	0	0	-	0	0	0	0	-	0	-
D18690	39981003	TGCAGATCATCCACTTGGAGAAGAAGAAAAAAAGAAGCTGACTGTGATCACTCTTTTGTTTTACAGATC	TGCAGATCATCCACTTGGAGAAGAAGAAAAAAAGAAGCCGACTGTGGTCACTCTTTTGTTTTACAGATC	chr2	1267443761	1	1.88e-24	Plus	46:A>G	0	0	1	0	0	0	0	0	-	0	-	0	0	0	0	-	0	0	0	0	0	0	0	0	0	0	-	0	0	0	0	0	0	0	0	0	0	0	0	0
D18708	13912025	TGCAGTCGATGATAATAATTCGTAAAAACCGGAAGAGTAGAAGAGCATTACAGATCGGAAGAGCGGTTC	TGCAGTCGATGATAATAATTCGTAAAAACCAGAAAAGTAGAAGAGCATTACAGATCGGAAGAGCGGTTC	chr1L	1003489875	1	2.11e-17	Plus	34:G>A	0	-	0	0	0	0	0	0	0	0	-	0	0	-	0	-	0	0	-	-	0	-	0	0	0	0	0	0	0	0	0	0	0	-	1	0	0	-	-	0
D18728	13912613	TGCAGAAATTTGTCAAATGATTGCCTCATTCAGTTTTCAGCCAAAAACAAAACTAGAAAAACAATTACA	TGCAGAAATTTGTCAAATGATTGCCTCATTCAATTTTCAGCCAAAAACAAAACTAGAAAAACAATTACA	chr6	761345961	1	1.28e-26	Plus	32:G>A	0	0	1	0	2	0	0	0	0	0	0	2	0	-	0	-	0	0	0	0	0	0	0	0	0	0	0	-	0	0	-	0	-	0	0	0	0	0	0	0
D18729	13912613	TGCAGAAATTTGTCAAATGATTGCCTCATTCAGTTTTCAGCCAAAAACAAAACTAGAAAAACAATTACA	TGCAGAAATTTGTCAAATGATTGCCTCATTCAGTTTTCAGCCAAAAACAAAACTACAAAAACAATTACA	chr6	761345984	1	1.28e-26	Plus	55:G>C	0	0	-	0	0	0	0	0	0	0	0	0	0	-	0	-	0	0	0	0	0	0	0	0	0	0	0	-	0	0	-	2	-	0	0	0	2	0	0	0
D18744	18322069	TGCAGATCATCTACTCGGAGAAGAAGAAGAAAAAGATGCTGACTGTGATCACTCTTTTGTTTTACAGAT	TGCAGATCATCTACTCGGAGAAGAAGAAGAACAAGATGCTGACTGTGATCACTCTTTTGTTTTACAGAT	chr1L	1430262321	1	5.37e-25	Minus	31:A>C	0	0	0	0	0	0	0	0	0	0	-	0	0	-	0	0	0	0	0	0	0	0	-	0	0	0	-	0	0	0	0	0	-	0	0	0	0	0	0	0
D18819	39980883	TGCAGTGAGAGTGTCTGGTCAAAAGCTGAAGCTACTTTATATGATTTTTGAACTTGAATGGATTACAGA	TGCAGTGAGAGTGTCTGGTCAAAAGCTGAAGCTACTTTATATGATTTTTGAACTTGAATGGATTAACGA	chr2	0	1	1.65e-25	Plus	65:C>A	0	0	0	0	0	0	0	0	0	0	-	-	0	0	0	-	0	0	0	-	0	0	0	0	0	0	-	-	0	0	0	0	0	0	0	0	0	0	0	0
D18877	13869441	TGCAGCATTGGTTGTTCCATTAGGGTCGATTGGAAAATGGTGTAACTCGCTTTTTACAGATCGGAAGAG	TGCAGCATTGGTTGTTCCATTAGGGTCTGTTGGAAAATGGTGTAACTCGCTTTTTACAGATCGGAAGAG	contig_7839	1390	1	5.48e-19	Minus	28:A>G	0	0	-	-	0	0	0	0	0	0	0	0	0	0	0	0	0	0	0	0	0	0	-	0	0	0	-	0	-	0	0	0	-	0	0	0	0	0	0	0
D18918	39981125	TGCAGAGAGGACAAAGTCGGGTCCGTCGCTCCGAACGAAAGAAGCGGTACATGAAGTTCATTACAGATC	TGCAGAGAGGACAAAGTCGGGTCCGTCGCTCCGAACGAAAGAAGCGGTACATGAAGTTCATTAAAACTG	chr1S	0	1	1.88e-24	Plus	66:A>C	0	0	0	0	0	0	0	0	-	0	0	0	0	0	-	0	0	0	0	-	0	0	0	0	0	0	0	-	0	0	0	0	0	0	0	0	0	0	0	0
D18932	3524243	TGCAGCATAGCATGAAAAAATCCATAAGTAGCGGTAAAACAATCATGAACAACAAACAAACTTTACAGA	TGCAGCATAGCATGAAAATATCCATAAGTAGCGGTAAAACAATCATGAACAACAAACAAACTTTACAGA	chr2	1454070406	1	1.65e-25	Minus	18:A>T	0	0	0	0	0	0	-	0	-	0	0	0	0	0	2	0	2	0	0	0	0	-	0	0	0	-	0	0	0	0	0	0	0	1	0	0	0	0	0	0
D18951	39973825	TGCAGGCATGCAGGGAGGTGGGCATGATCGTTTTAGTGACTCTAATCCATGCTATCACCTAGAAAAAAT	TGCAGACATGCAGGGAGGCGGGTATGATCATTTTAGTCACTCTAATTCATGCTATCACCTAGAAAAAAT	chr5	959256745	1	9.88e-28	Minus	18:T>C	0	0	0	0	0	0	0	-	-	0	0	0	0	0	0	0	0	0	0	0	0	0	0	0	0	-	0	0	0	0	0	0	0	0	0	-	0	0	0	0
D18956	13869127	TGCAGGTGGAATATAGATAGGCGTCGCAGATCAAATGAGAGAGTCAAGAATTACCAAATTCTTTACAGA	TGCAGGTGAAATATAGATAGGCGTCGCAGATCAAATGAGAGAGTCAAGAATTACCAAATTCTTTACAGA	contig_5310	37938	1	1.65e-25	Minus	8:G>A	0	0	-	0	0	0	0	0	0	0	-	2	0	0	0	0	0	0	0	2	0	0	0	0	0	-	0	-	0	0	1	0	0	0	2	-	2	0	1	0
D19034	3521643	TGCAGCAAAAGCTCGAGAGTATCTTGACAAACCTGCCATACACGAGACAATGGTTACAGATCGGAAGAG	TGCAGCAAAAGCTCAAGAGTATCTCGACAAACCTGCCATACACGAGACAATGGTTACAGATCGGAAGAG	chr1S	426880030	1	1.18e-20	Minus	24:T>C	0	0	0	0	0	0	0	0	0	0	-	0	0	-	-	0	0	0	0	0	0	-	0	0	0	0	0	0	0	0	0	0	0	0	0	-	0	0	0	-
D19140	39980970	TGCAGACACCATTCAAAGAAACACACACACTTGCAGAGAGAAAGAGAGTTTTTCTTACAGTTTTACAGA	TGCAGACACCATTCAAAGAAACAGACACACTTGCAGAGAGAAAGAGAGTTTTTCTTACAGTTTTACAGA	chr1S	1083504358	1	1.65e-25	Minus	23:C>G	0	0	0	0	0	0	-	0	0	0	0	0	0	0	0	-	0	0	-	0	0	0	0	0	0	-	0	0	0	0	0	0	0	0	0	-	0	0	0	0
D19141	39980970	TGCAGACACCATTCAAAGAAACACACACACTTGCAGAGAGAAAGAGAGTTTTTCTTACAGTTTTACAGA	TGCAGACACCATTCAAAGAAACACACACACTTGCAGAGAGAAAGAGAGTTTTTCTTACAGTTTTAAAGA	chr1S	0	1	1.65e-25	Minus	65:C>A	0	0	0	0	0	0	-	0	0	0	0	0	0	0	0	-	0	0	-	0	0	0	0	0	0	-	0	0	0	0	0	0	0	0	0	-	0	0	0	0
D19213	13912638	TGCAGCCTTGGTAGTAGTTTGAACTTCATTCTCAGTTTACTGCAAATTTTTATCGAACATTTTACAGAT	TGCAGCTTTGGTAGTAGTTTGAACTTCATTCTCAGTTTACTGCAAATTTTTATCGAACATTTTACAGAT	chr2	1038464496	1	5.37e-25	Minus	6:C>T	0	0	0	0	0	0	0	0	-	0	0	0	2	0	0	0	0	0	0	0	0	0	0	0	0	-	0	0	0	0	0	0	0	0	0	0	0	0	0	-
D19254	3521034	TGCAGCCTATCATGTTTTCAGAAATGTCGCTGCTTCCCCTAGTTGCATGTAAGAATATACGCATTATTA	TGCAGCCTATCATGTTTTCAGAAATGTCGCTGCTTCCCCTAGTTGCATGTAAGAATATATGCATTATTA	chr2	1105686482	1	4.6e-26	Plus	59:C>T	0	-	0	0	-	0	-	0	-	0	0	0	0	0	0	0	0	0	-	0	0	0	-	-	0	0	0	0	0	0	0	0	2	0	0	-	0	0	0	0
D19271	18322057	TGCAGTGCATTCATCTCATTTGTAATGCTTTCAATTCGAGTTGAAGCTTCGTTACTTTTACAGATCGGA	TGCAGTACTGTCATCTCATTTGTAATACTTTCAATTTGAGTTGAAGCTTCATTGCTTTTACAGATCGGA	chr6	1353267941	1	8.01e-23	Minus	8:A>T	0	0	-	0	0	-	-	0	0	0	0	0	0	-	-	-	0	0	-	0	-	0	0	0	0	0	0	-	0	0	-	0	0	0	-	0	0	0	-	-
D19273	18322057	TGCAGTGCATTCATCTCATTTGTAATGCTTTCAATTCGAGTTGAAGCTTCGTTACTTTTACAGATCGGA	TGCAGTGCATTCATCTCATTTGTAATGCTTTCAATTCGAGTTGAAGCTTCATTAGTTTTACAGATCGGA	chr6	1353267899	1	8.01e-23	Minus	50:G>A	0	0	-	0	0	1	-	0	0	0	0	0	0	-	-	-	0	0	-	0	-	0	0	0	0	0	0	-	0	0	-	0	0	0	-	0	0	0	-	-
D19348	3523379	TGCAGAAGCTGATGATGAAGCTGATGATCCAGGTGCTCTGGCCGCAGTTGGTTGTTTACGTGCTATTAG	TGCAGAAGCTGATGATGAAGCTGATGATCCAGATGCTCTGGCCGCAATTGGTTGTTTACGTGCTATTAG	chr1S	155721617	1	9.88e-28	Plus	32:G>A	0	0	0	0	0	0	0	0	0	0	0	0	2	0	0	0	0	0	0	0	0	0	-	0	0	0	0	0	0	0	0	0	-	0	0	0	0	0	0	0
D19432	39981227	TGCAGATTGTCTTTTTGGAATTGTGTAAGAGTCGTGAGCAAGTTCTTTACCGCGAAAAGATTACAGATC	TGCAGATTGTCTTTTTGGAATTGTGTAAGAGTCGTGAGCAAGTTCTTTACCGCGAAAAGATTAAACTGG	chr6	0	1	1.88e-24	Plus	63:C>A	0	0	0	0	0	0	0	0	0	0	0	0	0	0	0	0	0	0	0	0	-	0	0	0	0	0	0	0	0	0	0	0	0	0	0	0	0	0	0	0
D19475	13869125	TGCAGGTGATCTGTTTCCGCGGTGTCGGTATTGTCGTGGCCGTTTTTGCGGTCACGAACGGTTTTTTAC	TGCAGGTGATCTGTTTCCGTGGTGTCGGTATTGTCGTGGCCGTTTTTGCGGTCACGAACGGTTTTTTAC	chr3	1558587922	1	3.55e-27	Plus	19:C>T	0	1	0	0	-	2	2	-	0	0	0	0	0	0	0	-	0	0	0	0	-	0	0	0	0	0	0	0	0	0	0	0	0	0	-	0	0	0	-	-
D19476	13869125	TGCAGGTGATCTGTTTCCGCGGTGTCGGTATTGTCGTGGCCGTTTTTGCGGTCACGAACGGTTTTTTAC	TGCAGGTGATCTGTTTCCGTGGTGTCGGTATTGTCGTGGCCGCTTTTGCGGTCACGAACGGTTTTTTAC	chr3	1558587945	1	3.55e-27	Plus	42:T>C	0	-	0	0	-	0	0	-	0	0	0	0	0	0	0	-	0	0	0	0	-	0	0	0	0	0	0	0	0	0	0	0	0	0	-	0	0	0	-	-
D19477	13869125	TGCAGGTGATCTGTTTCCGCGGTGTCGGTATTGTCGTGGCCGTTTTTGCGGTCACGAACGGTTTTTTAC	TGCAGGTGATCTGTTTCCGCGGTGTCGGTATTGTCGTGGCCGTTTTTGCGGTAACGAACGGTTTTTTAC	chr3	1558587955	1	3.55e-27	Plus	52:C>A	0	-	0	0	-	0	0	-	0	0	0	0	0	0	0	-	0	0	0	0	-	0	0	0	0	0	0	0	0	0	0	0	0	0	-	0	0	0	1	-
D19709	3522746	TGCAGTAAATCCATTTTTTATACTGAGTTGTTTGAATTTCAAAGCAATTCATGACAAATGAGCTCTAAC	TGCAGTAAATCCATTTTTTATACTGAATTGTTTGAATTTCAAAGCAATTCATGACAAATGAGCTCTAAA	chr2	337322099	1	4.6e-26	Plus	26:G>A	0	0	0	0	0	0	0	-	-	0	0	-	0	-	0	0	0	0	0	0	0	0	0	0	0	-	0	-	0	0	0	0	0	-	-	-	0	0	0	0
[truncated: 5,166 more rows]
[truncated: 147 more columns]
